# Supplementary material for: Global burden and temporal trends in incidence and mortality of oesophageal cancer
Source: PubMed Central journal article supplement — J Adv Res. 2022 Oct 20;50:135–44. doi: 10.1016/j.jare.2022.10.007 (PMC10403692; doi:10.1016/j.jare.2022.10.007), 2022-10-20
Supplement: mmc1.pdf [file mmc1.pdf]

## Supplemental Materials

Figure S1: The average annual percentage change (AAPC) of the incidence of oesophageal cancer in men and women older than 50 years old. \**P* values less than 0.05.

Figure S2: The average annual percentage change (AAPC) of the incidence of oesophageal cancer in men and women younger than 50 years old. \**P* values less than 0.05.

Table S1: The incidence and mortality data of oesophageal cancer.

Table S2: The AAPC of the mortality of oesophageal cancer in individuals of all ages.

Table S3: The AAPC of the incidence of oesophageal cancer in individuals of all ages.

Table S4: The AAPC of the incidence of oesophageal cancer in individuals older than 50 years old.

Table S5: The AAPC of the incidence of oesophageal cancer in individuals younger than 50 years old.

Table S6: The mortality ASR and correlated 95%CI.

Table S7: The incidence ASR and correlated 95%CI.

Incidence AAPC for Men (>= 50 years old)

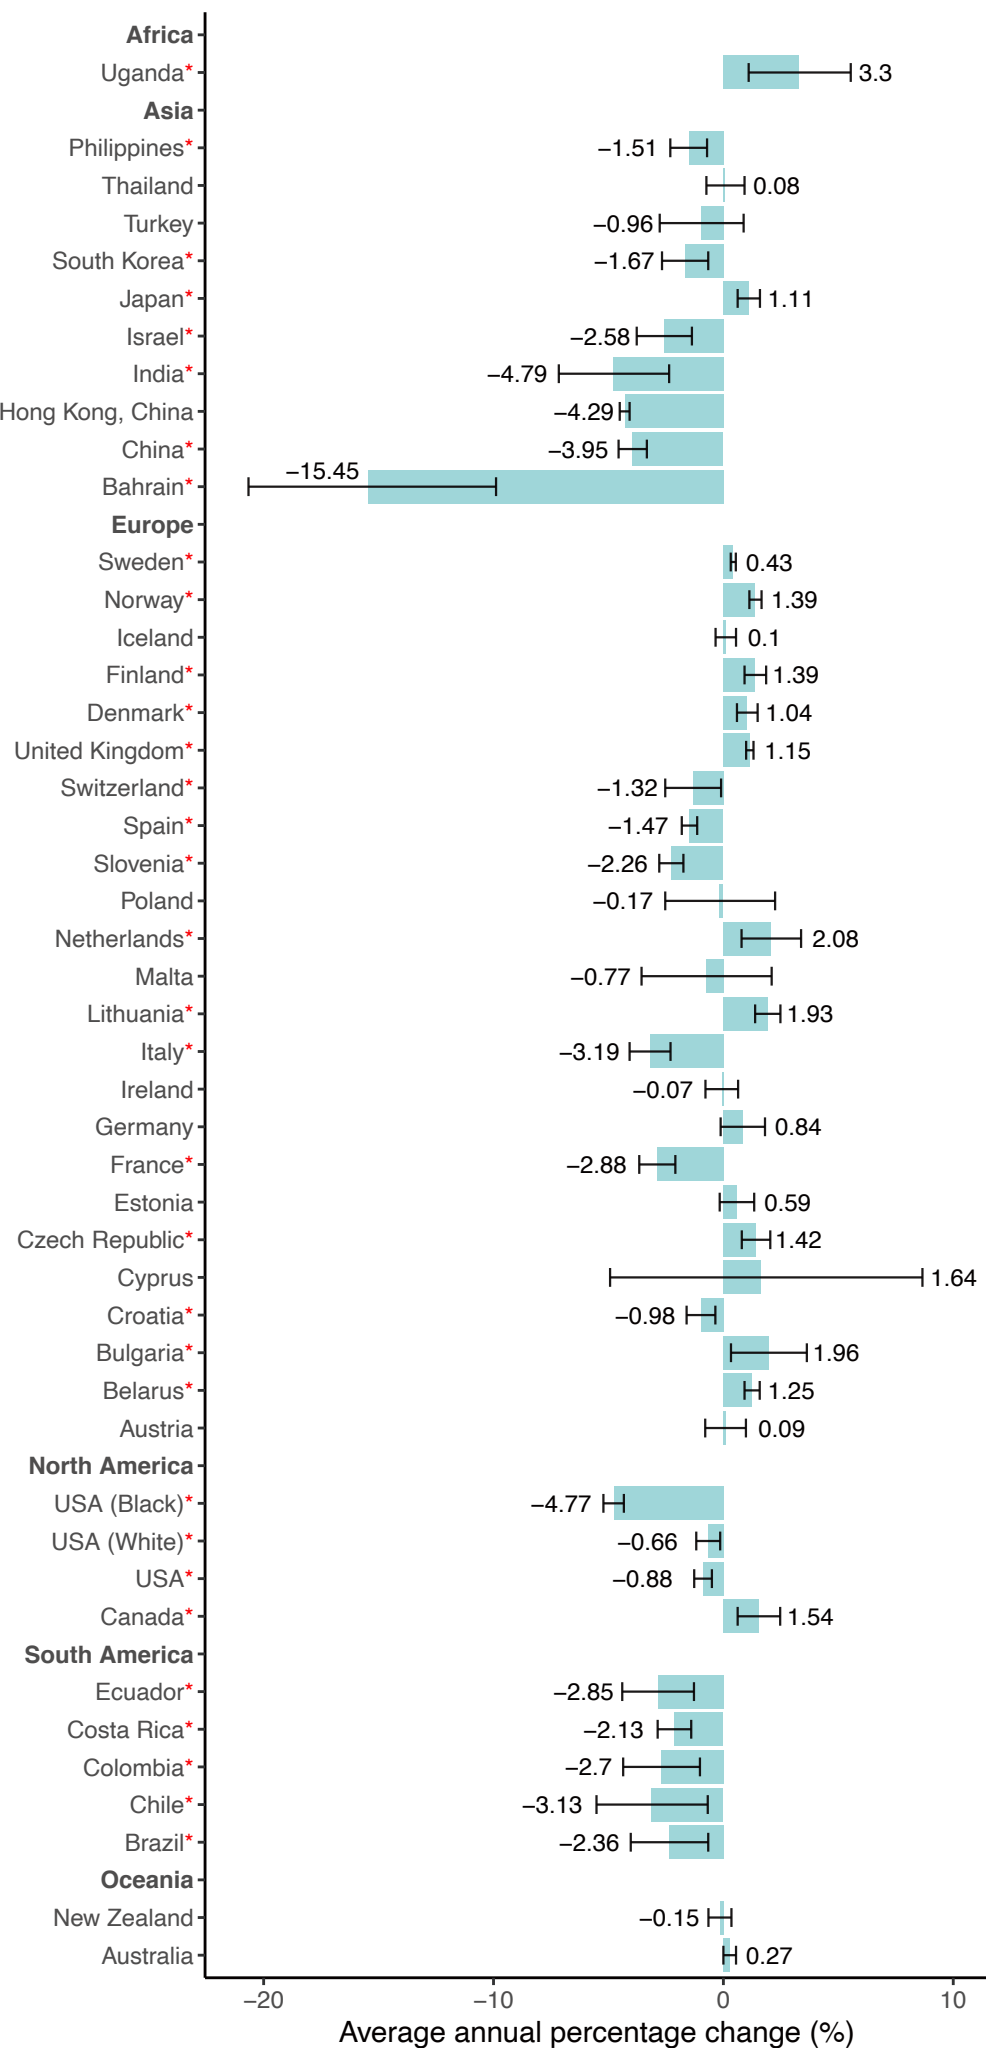

Incidence AAPC for Women (>= 50 years old)

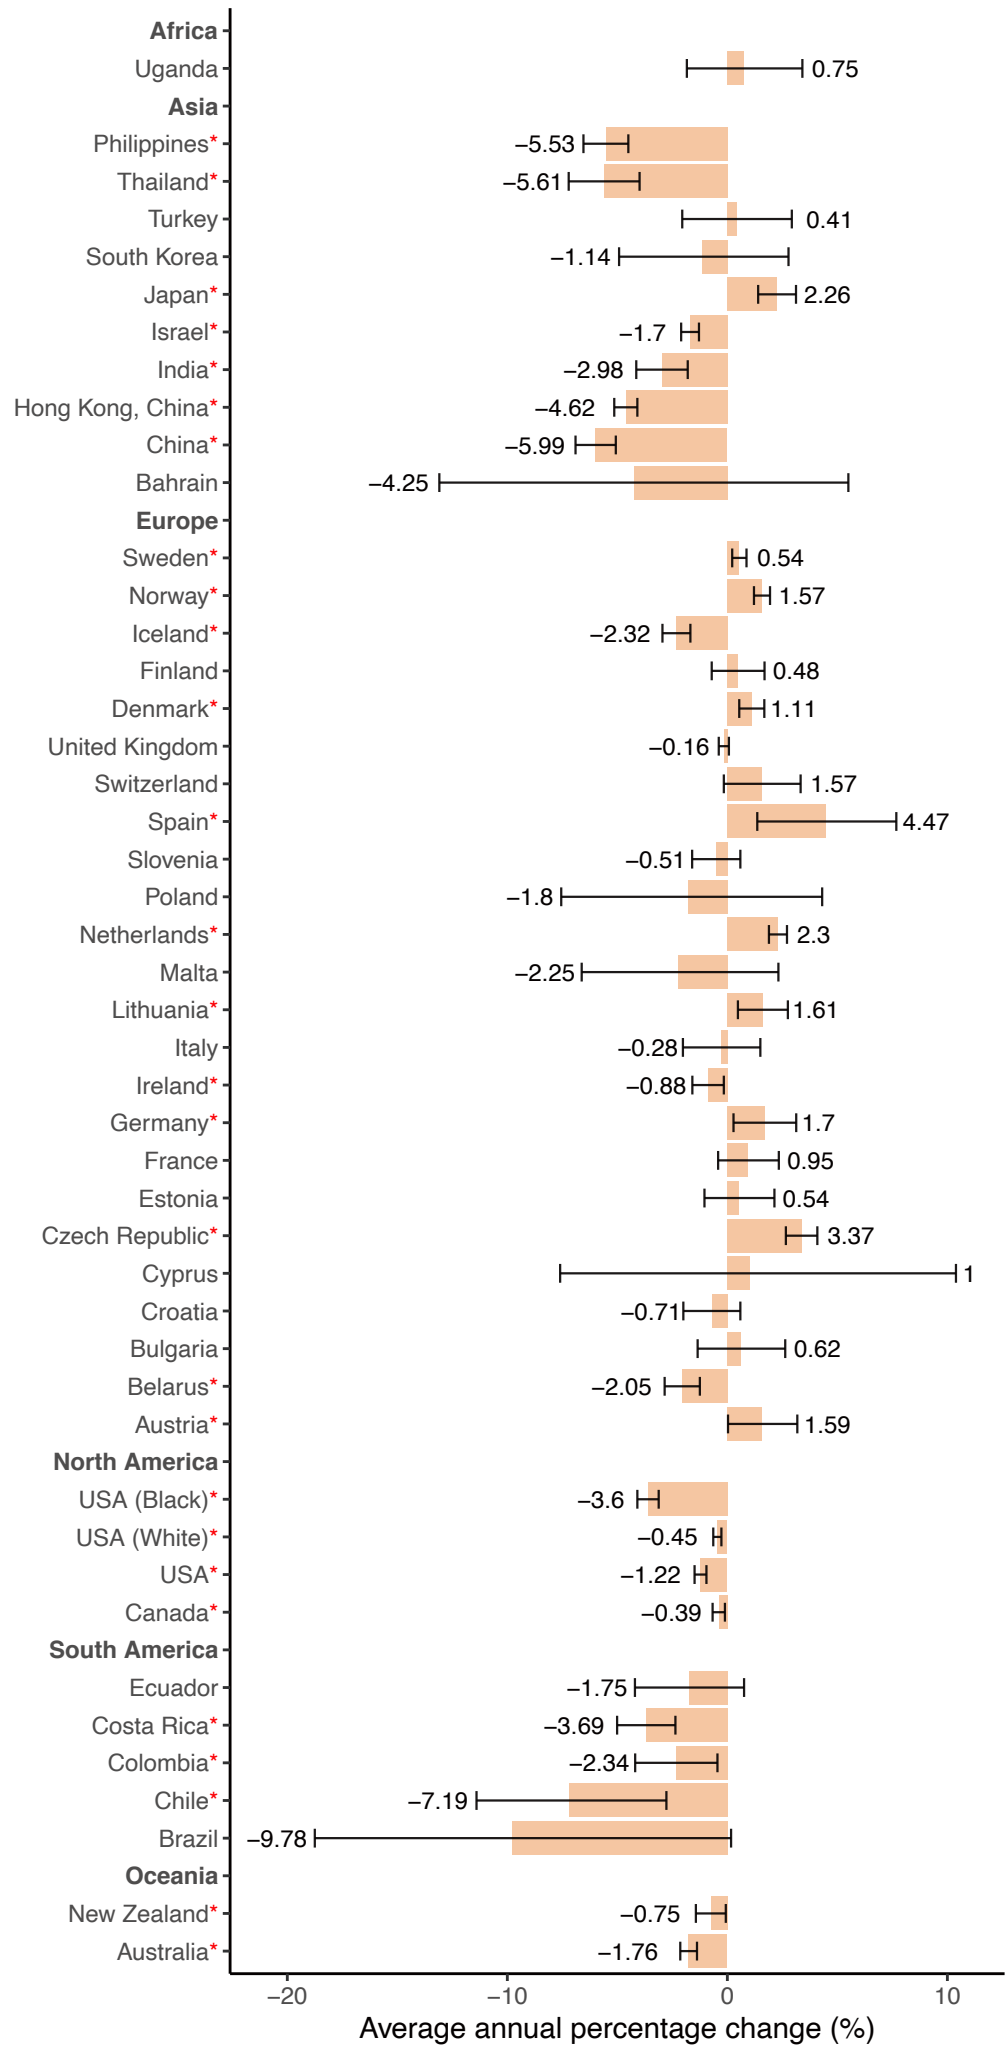

Incidence AAPC for Men (< 50 years old)

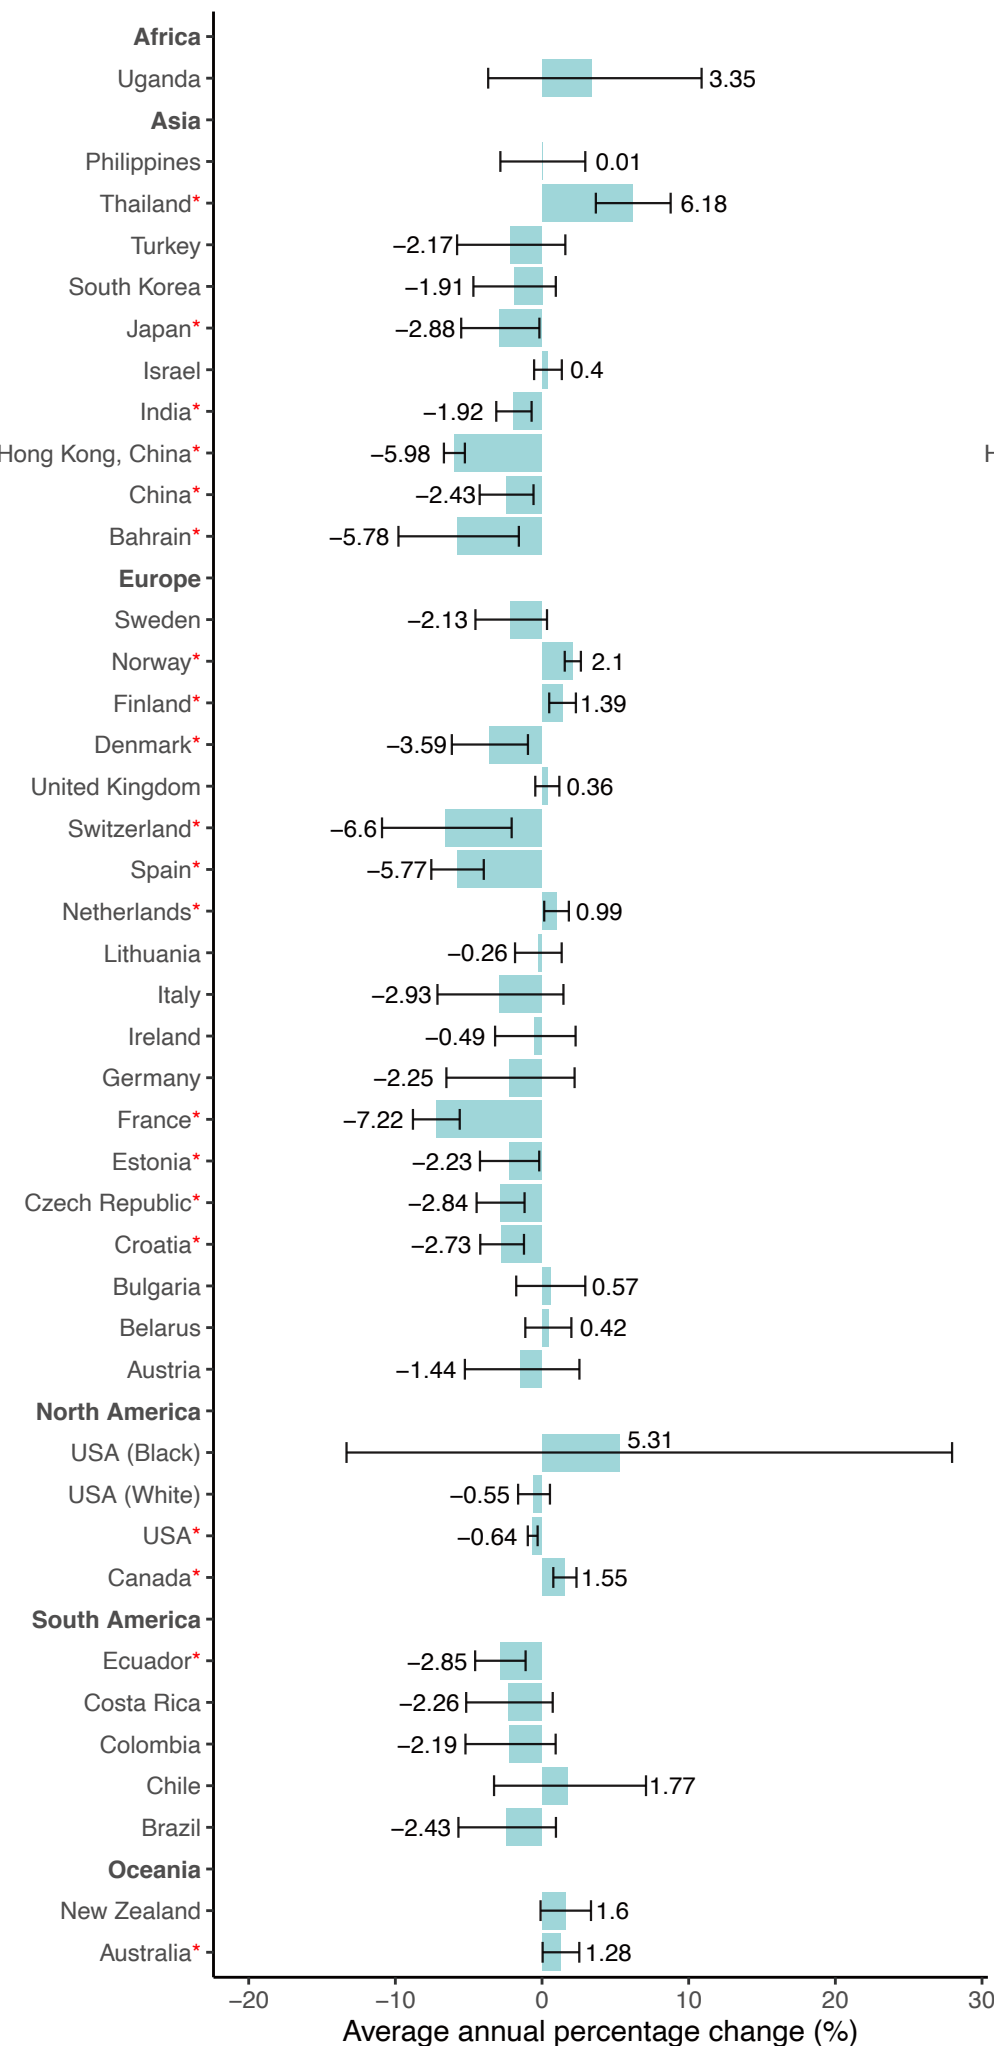

Incidence AAPC for Women (< 50 years old)

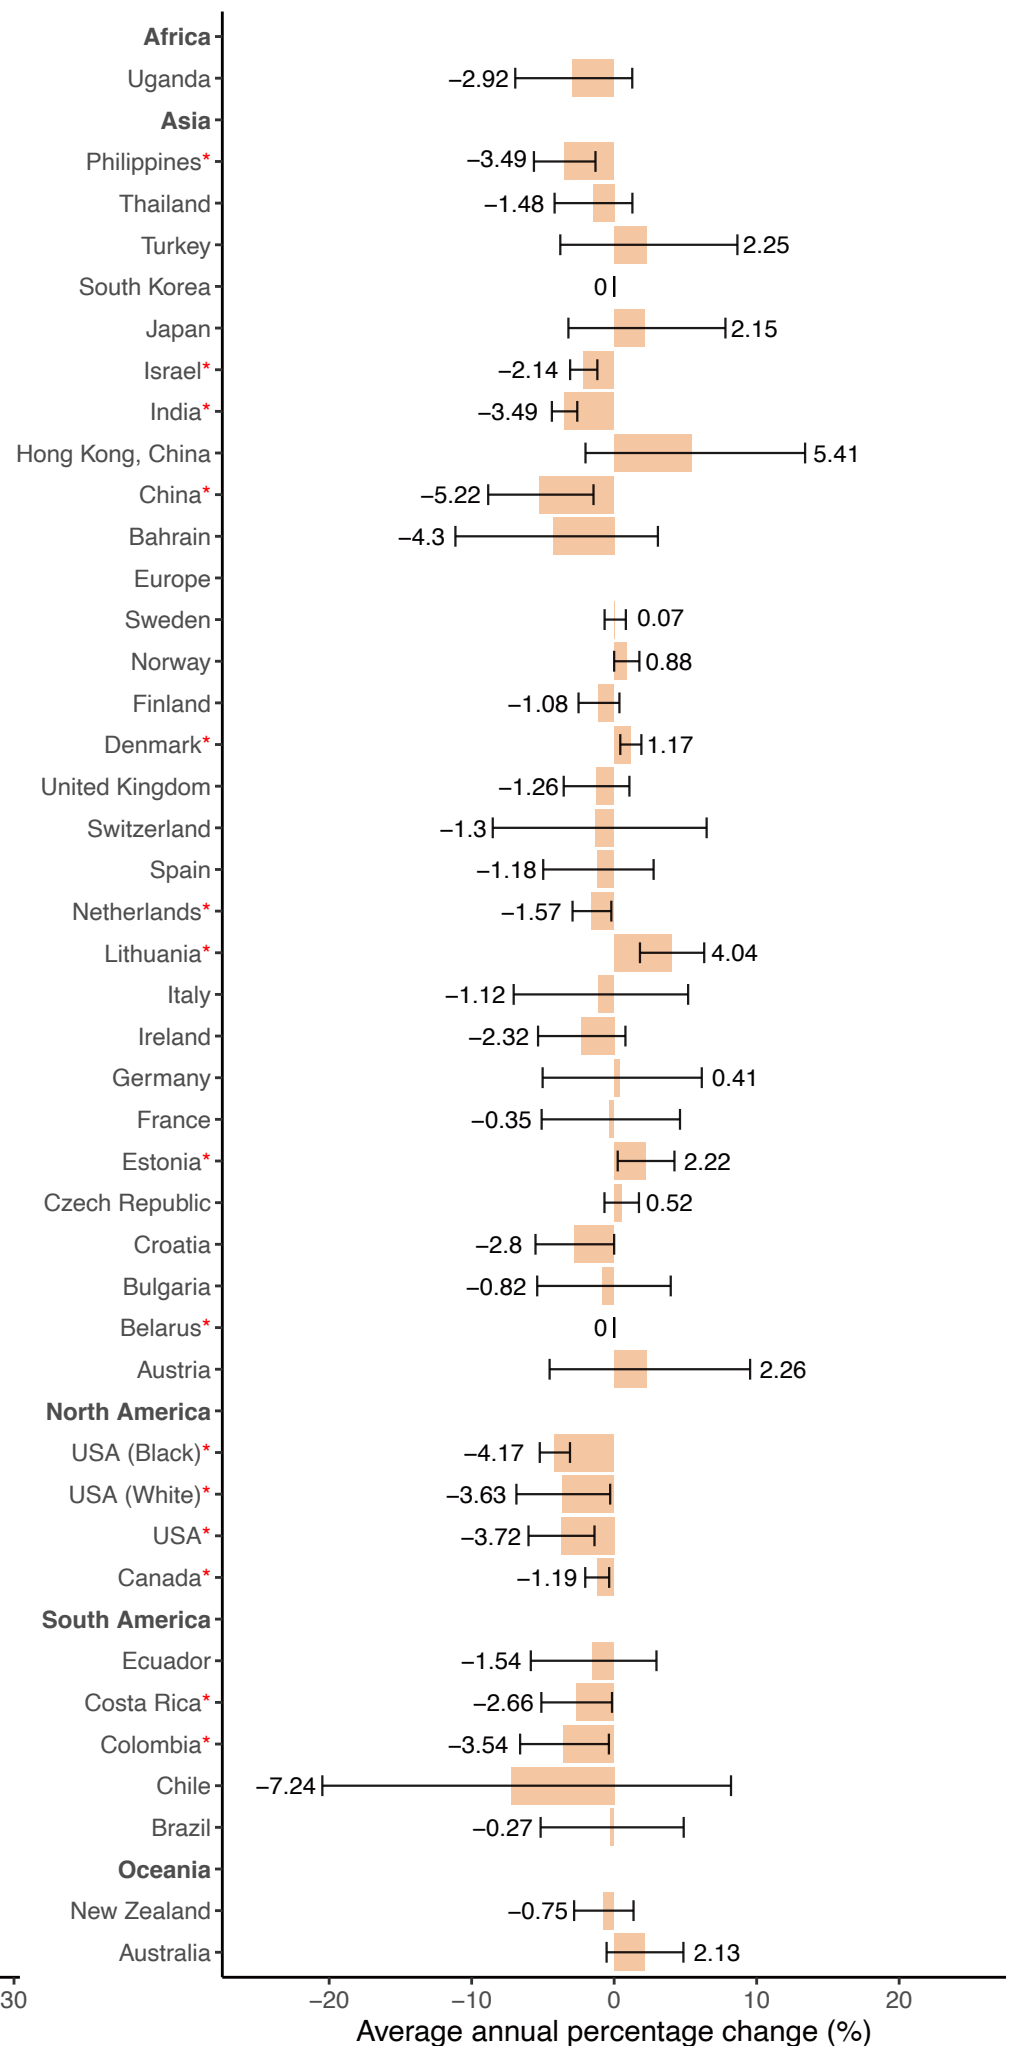

Table S1: The incidence and mortality data of oesophageal cancer

| Country            | Incidence |         | Mortality |         |
|--------------------|-----------|---------|-----------|---------|
| Australia          | 1993-2012 | CI5     | 1979-2018 | WHO     |
| Austria            | 1998-2012 | CI5     | 1980-2019 | WHO     |
| Belarus            | 1983-2012 | CI5     | 1981-2018 | WHO     |
| Belgium            | NA        | NA      | 1979-2016 | WHO     |
| Brazil             | 1993-2012 | CI5*    | 1979-2018 | WHO     |
| Bahrain            | 1998-2012 | CI5     | NA        | NA      |
| Bulgaria           | 1998-2012 | CI5     | 1980-2018 | WHO     |
| Canada             | 1983-2012 | CI5*    | 1979-2019 | WHO     |
| Chile              | 1998-2012 | CI5*    | 1980-2018 | WHO     |
| China              | 1998-2012 | CI5*    | NA        | NA      |
| Colombia           | 1983-2012 | CI5*    | 1981-2017 | WHO     |
| Costa Rica         | 1982-2011 | CI5     | 1980-2018 | WHO     |
| Croatia            | 1988-2012 | CI5     | 1985-2017 | WHO     |
| Cyprus             | 1998-2012 | CI5     | 1999-2018 | WHO     |
| Czech Republic     | 1983-2012 | CI5     | 1986-2019 | WHO     |
| Denmark            | 1943-2019 | Nordcan | 1970-2019 | Nordcan |
| Ecuador            | 1985-2012 | CI5*    | 1979-2017 | WHO     |
| Estonia            | 1983-2012 | CI5     | 1994-2019 | WHO     |
| Finland            | 1953-2019 | Nordcan | 1953-2019 | Nordcan |
| France             | 1998-2011 | CI5*    | 1979-2016 | WHO     |
| Germany            | 1998-2012 | CI5*    | 1990-2019 | WHO     |
| China, Hong Kong   | 1983-2012 | CI5     | 1979-2017 | WHO     |
| Iceland            | 1955-2019 | Nordcan | 1951-2019 | Nordcan |
| India              | 1983-2012 | CI5*    | NA        | NA      |
| Ireland            | 1994-2012 | CI5     | 1979-2015 | WHO     |
| Israel             | 1963-2012 | CI5     | 1979-2018 | WHO     |
| Italy              | 1998-2010 | CI5*    | 1979-2017 | WHO     |
| Japan              | 1998-2010 | CI5*    | 1979-2017 | WHO     |
| Korea              | 1999-2012 | CI5*    | 1985-2019 | WHO     |
| Latvia             | NA        | NA      | 1980-2018 | WHO     |
| Lithuania          | 1988-2012 | CI5     | 1993-2019 | WHO     |
| Malta              | 1993-2012 | CI5     | 1979-2017 | WHO     |
| Netherlands        | 1989-2012 | CI5     | 1979-2018 | WHO     |
| New Zealand        | 1983-2012 | CI5     | 1979-2016 | WHO     |
| Norway             | 1953-2019 | Nordcan | 1961-2019 | Nordcan |
| Philippines        | 1983-2012 | CI5*    | 1992-2014 | WHO     |
| Poland             | 1998-2012 | CI5*    | 1980-2018 | WHO     |
| Portugal           | NA        | NA      | 1980-2018 | WHO     |
| Russian Federation | NA        | NA      | 1980-2019 | WHO     |
| Singapore          | NA        | NA      | 1979-2019 | WHO     |
| Slovenia           | 1983-2012 | CI5     | 1985-2019 | WHO     |

|                |           |         |           |         |
|----------------|-----------|---------|-----------|---------|
| Spain          | 1993-2010 | CI5*    | 1980-2017 | WHO     |
| Sweden         | 1960-2019 | Nordcan | 1952-2019 | Nordcan |
| Switzerland    | 1998-2012 | CI5*    | 1995-2017 | WHO     |
| Turkey         | 1998-2012 | CI5*    | 2009-2019 | WHO     |
| Thailand       | 1993-2012 | CI5*    | 1979-2019 | WHO     |
| Uganda         | 1993-2012 | CI5*    | NA        | NA      |
| United Kingdom | 1995-2012 | CI5*    | 1979-2016 | WHO     |
| USA            | 1975-2018 | SEER*   | 1969-2019 | SEER    |
| USA Black      | 1975-2018 | SEER*   | 1969-2020 | SEER    |
| USA White      | 1975-2018 | SEER*   | 1969-2021 | SEER    |

---

CI5: Cancer Incidence in Five Continents V; NORDCAN: Nordic Cancer Registries; SEER: Surveillance, Epidemiology, and End Results Program; WHO: World Health Organization; NA: not available.

\*Subnational data

TableS2. The AAPC of the mortality of oesophageal cancer in individuals of all ages.

| Country            | Lower endpoint | Upper endpoint | AAPC   | Low95  | High95 | Pvalue  | Sex    |
|--------------------|----------------|----------------|--------|--------|--------|---------|--------|
| Australia          | 2009           | 2018           | -1.86* | -2.2   | -1.53  | < 0.001 | Female |
| Austria            | 2010           | 2019           | 1.44*  | 0.98   | 1.91   | < 0.001 | Female |
| Belarus            | 2002           | 2018           | -1.43* | -2.34  | -0.5   | 0.004   | Female |
| Belgium            | 2007           | 2016           | 1.05*  | 0.73   | 1.37   | < 0.001 | Female |
| Brazil             | 2010           | 2019           | -2.18* | -2.63  | -1.73  | < 0.001 | Female |
| Bulgaria           | 2009           | 2018           | -0.31  | -2.85  | 2.29   | 0.805   | Female |
| Canada             | 2010           | 2019           | -0.33* | -0.5   | -0.15  | 0.001   | Female |
| Chile              | 2009           | 2018           | -4.76* | -5.35  | -4.16  | < 0.001 | Female |
| Colombia           | 2008           | 2017           | -4.04* | -4.31  | -3.77  | < 0.001 | Female |
| Costa Rica         | 2010           | 2019           | -4.84* | -5.74  | -3.94  | < 0.001 | Female |
| Croatia            | 2008           | 2017           | -1.25* | -1.91  | -0.58  | 0.001   | Female |
| Cyprus             | 2005           | 2018           | -3.67  | -12.85 | 6.48   | 0.42    | Female |
| Czech Republic     | 2010           | 2019           | 1.50*  | 1.01   | 1.98   | < 0.001 | Female |
| Ecuador            | 2008           | 2017           | -3.08* | -3.75  | -2.41  | < 0.001 | Female |
| Estonia            | 2010           | 2019           | 6.70*  | 1.34   | 12.34  | 0.015   | Female |
| France             | 2007           | 2016           | -0.18* | -0.33  | -0.03  | 0.021   | Female |
| Germany            | 2010           | 2019           | -0.38  | -0.99  | 0.23   | 0.214   | Female |
| Hong Kong SAR      | 2008           | 2017           | -4.20* | -4.51  | -3.89  | < 0.001 | Female |
| Ireland            | 2006           | 2015           | -1.52* | -1.84  | -1.19  | < 0.001 | Female |
| Israel             | 2009           | 2018           | -1.70* | -2.28  | -1.12  | < 0.001 | Female |
| Italy              | 2008           | 2017           | 0.93   | -1.43  | 3.34   | 0.445   | Female |
| Japan              | 2009           | 2018           | -0.29* | -0.43  | -0.15  | < 0.001 | Female |
| Republic of Korea  | 2010           | 2019           | -1.49  | -3.66  | 0.72   | 0.177   | Female |
| Latvia             | 2009           | 2018           | 4.64*  | 2.88   | 6.42   | < 0.001 | Female |
| Lithuania          | 2010           | 2019           | 1.98*  | 1.21   | 2.76   | < 0.001 | Female |
| Malta              | 2008           | 2017           | -2.65* | -4.36  | -0.9   | 0.004   | Female |
| Netherlands        | 2009           | 2018           | 0.52*  | 0.14   | 0.89   | 0.008   | Female |
| New Zealand        | 2007           | 2016           | -1.17* | -1.61  | -0.72  | < 0.001 | Female |
| Philippines        | 2001           | 2014           | -3.03* | -4.12  | -1.92  | < 0.001 | Female |
| Poland             | 2009           | 2018           | -0.33* | -0.54  | -0.11  | 0.004   | Female |
| Portugal           | 2009           | 2018           | -3.86* | -4.33  | -3.38  | < 0.001 | Female |
| Russian Federation | 2010           | 2019           | 0.47   | -0.49  | 1.44   | 0.328   | Female |
| Singapore          | 2009           | 2019           | -6.89* | -7.63  | -6.15  | < 0.001 | Female |
| Slovenia           | 2010           | 2019           | -0.21  | -1.2   | 0.78   | 0.664   | Female |
| Spain              | 2008           | 2017           | 0.41   | -0.21  | 1.03   | 0.187   | Female |
| Switzerland        | 2008           | 2017           | -0.68  | -1.58  | 0.22   | 0.132   | Female |
| Thailand           | 2010           | 2019           | 0.36   | -1.15  | 1.9    | 0.629   | Female |

|                   |      |      |        |       |       |         |        |
|-------------------|------|------|--------|-------|-------|---------|--------|
| United Kingdom    | 2007 | 2016 | -1.40* | -1.6  | -1.19 | < 0.001 | Female |
| Denmark           | 2010 | 2019 | 1.85   | -5.17 | 9.37  | 0.615   | Female |
| Finland           | 2010 | 2019 | -0.25  | -1.35 | 0.85  | 0.646   | Female |
| Iceland           | 2010 | 2019 | -2.44* | -3.05 | -1.83 | < 0.001 | Female |
| Norway            | 2010 | 2019 | 0.89*  | 0.42  | 1.37  | < 0.001 | Female |
| Sweden            | 2010 | 2019 | 0.34*  | 0.04  | 0.65  | 0.029   | Female |
| USA               | 2010 | 2019 | -1.52* | -1.69 | -1.36 | < 0.001 | Female |
| USA (White)       | 2010 | 2019 | -0.95* | -1.16 | -0.73 | < 0.001 | Female |
| USA (Black)       | 2010 | 2019 | -4.38* | -4.62 | -4.13 | < 0.001 | Female |
| Australia         | 2009 | 2018 | -1.29* | -1.84 | -0.75 | < 0.001 | Male   |
| Austria           | 2010 | 2019 | -1.46* | -2.44 | -0.46 | 0.005   | Male   |
| Belarus           | 2002 | 2018 | 0.3    | 0     | 0.59  | 0.051   | Male   |
| Belgium           | 2007 | 2016 | -0.3   | -0.69 | 0.1   | 0.139   | Male   |
| Brazil            | 2010 | 2019 | -1.58* | -2    | -1.16 | < 0.001 | Male   |
| Bulgaria          | 2009 | 2018 | 0.71   | -0.5  | 1.94  | 0.24    | Male   |
| Canada            | 2010 | 2019 | -0.42* | -0.65 | -0.18 | 0.001   | Male   |
| Chile             | 2009 | 2018 | -4.95* | -5.31 | -4.58 | < 0.001 | Male   |
| Colombia          | 2008 | 2017 | -3.72* | -4.37 | -3.08 | < 0.001 | Male   |
| Costa Rica        | 2010 | 2019 | -3.13* | -3.72 | -2.54 | < 0.001 | Male   |
| Croatia           | 2008 | 2017 | -1.05* | -1.46 | -0.64 | < 0.001 | Male   |
| Cyprus            | 2009 | 2018 | -1.26  | -6.62 | 4.4   | 0.634   | Male   |
| Czech Republic    | 2010 | 2019 | -0.27  | -0.54 | 0.01  | 0.06    | Male   |
| Ecuador           | 2008 | 2017 | -1.60* | -2.58 | -0.6  | 0.003   | Male   |
| Estonia           | 2010 | 2019 | 0.15   | -0.46 | 0.76  | 0.621   | Male   |
| France            | 2007 | 2016 | -3.70* | -3.8  | -3.59 | < 0.001 | Male   |
| Germany           | 2010 | 2019 | -0.41* | -0.52 | -0.3  | < 0.001 | Male   |
| Hong Kong SAR     | 2008 | 2017 | -4.50* | -4.78 | -4.22 | < 0.001 | Male   |
| Ireland           | 2006 | 2015 | -0.96* | -1.43 | -0.49 | < 0.001 | Male   |
| Israel            | 2009 | 2018 | -0.83* | -1.35 | -0.31 | 0.003   | Male   |
| Italy             | 2008 | 2017 | -1.86* | -2.36 | -1.36 | < 0.001 | Male   |
| Japan             | 2009 | 2018 | -3.58* | -3.92 | -3.23 | < 0.001 | Male   |
| Republic of Korea | 2010 | 2019 | -4.62* | -4.88 | -4.35 | < 0.001 | Male   |
| Latvia            | 2009 | 2018 | 1.47*  | 1.1   | 1.83  | < 0.001 | Male   |
| Lithuania         | 2010 | 2019 | 1.15*  | 0.69  | 1.61  | < 0.001 | Male   |
| Malta             | 2008 | 2017 | -0.9   | -2.08 | 0.3   | 0.138   | Male   |
| Netherlands       | 2009 | 2018 | -0.47  | -1.1  | 0.17  | 0.146   | Male   |
| New Zealand       | 2007 | 2016 | -0.54  | -1.51 | 0.44  | 0.267   | Male   |
| Philippines       | 2001 | 2014 | -1.09* | -1.83 | -0.34 | 0.007   | Male   |
| Poland            | 2009 | 2018 | -0.56  | -1.63 | 0.52  | 0.294   | Male   |
| Portugal          | 2009 | 2018 | -0.33* | -0.48 | -0.18 | < 0.001 | Male   |

|                    |      |      |        |       |       |         |      |
|--------------------|------|------|--------|-------|-------|---------|------|
| Russian Federation | 2010 | 2019 | -0.50* | -0.85 | -0.15 | 0.006   | Male |
| Singapore          | 2009 | 2019 | -4.78* | -5.1  | -4.47 | < 0.001 | Male |
| Slovenia           | 2010 | 2019 | -2.75* | -3.24 | -2.24 | < 0.001 | Male |
| Spain              | 2008 | 2017 | -2.49* | -2.67 | -2.32 | < 0.001 | Male |
| Switzerland        | 2008 | 2017 | -3.40* | -6.04 | -0.68 | 0.015   | Male |
| Thailand           | 2010 | 2019 | 4.72*  | 3.79  | 5.66  | < 0.001 | Male |
| United Kingdom     | 2007 | 2016 | -0.98* | -1.19 | -0.77 | < 0.001 | Male |
| Denmark            | 2010 | 2019 | 0.34   | -0.89 | 1.58  | 0.583   | Male |
| Finland            | 2010 | 2019 | 0.33*  | 0.03  | 0.63  | 0.03    | Male |
| Iceland            | 2010 | 2019 | 0.37   | -0.55 | 1.3   | 0.427   | Male |
| Norway             | 2010 | 2019 | 0.68*  | 0.51  | 0.86  | < 0.001 | Male |
| Sweden             | 2010 | 2019 | 0.30*  | 0.2   | 0.39  | < 0.001 | Male |
| USA                | 2010 | 2019 | -1.24* | -1.36 | -1.12 | < 0.001 | Male |
| USA (White)        | 2010 | 2019 | -0.81* | -0.95 | -0.68 | < 0.001 | Male |
| USA (Black)        | 2010 | 2019 | -5.15* | -5.31 | -4.98 | < 0.001 | Male |

---

\**P* values less than 0.05.



Table S3. The AAPC of the incidence of oesophageal cancer in individuals of all ages.

| Country           | Lower endpoint | Upper endpoint | AAPC   | Low95  | High95 | Pvalue  | Sex  |
|-------------------|----------------|----------------|--------|--------|--------|---------|------|
| Australia         | 2003           | 2012           | 0.35*  | 0.06   | 0.63   | 0.019   | Male |
| Austria           | 2003           | 2012           | -1.06  | -2.38  | 0.26   | 0.116   | Male |
| Bahrain           | 2003           | 2012           | -9.10* | -15.51 | -2.2   | 0.015   | Male |
| Belarus           | 2003           | 2012           | 1.57*  | 1.12   | 2.02   | < 0.001 | Male |
| Brazil            | 2003           | 2012           | -2.33* | -3.89  | -0.76  | 0.006   | Male |
| Bulgaria          | 2003           | 2012           | 1.67*  | 0.11   | 3.24   | 0.037   | Male |
| Canada            | 2003           | 2012           | 0.75*  | 0.57   | 0.94   | < 0.001 | Male |
| Chile             | 2003           | 2012           | -3.09* | -5.27  | -0.87  | 0.01    | Male |
| China             | 2003           | 2012           | -3.78* | -4.35  | -3.2   | < 0.001 | Male |
| Colombia          | 2003           | 2012           | -2.61* | -4.17  | -1.02  | 0.002   | Male |
| Costa Rica        | 2002           | 2011           | -2.34* | -3.08  | -1.59  | < 0.001 | Male |
| Croatia           | 2003           | 2012           | -1.23* | -1.85  | -0.61  | < 0.001 | Male |
| Cyprus            | 2003           | 2012           | 0.23   | -5.52  | 6.34   | 0.934   | Male |
| Czech Republic    | 2003           | 2012           | 0.82*  | 0.18   | 1.46   | 0.014   | Male |
| Ecuador           | 2003           | 2012           | -2.89* | -4.44  | -1.32  | 0.001   | Male |
| Estonia           | 2003           | 2012           | 0.35   | -0.33  | 1.03   | 0.303   | Male |
| France            | 2002           | 2011           | -3.37* | -4.09  | -2.64  | < 0.001 | Male |
| Germany           | 2003           | 2012           | 0.62   | -0.44  | 1.7    | 0.231   | Male |
| Hong Kong SAR     | 2003           | 2012           | -4.43* | -4.63  | -4.22  | < 0.001 | Male |
| India             | 2003           | 2012           | -5.43* | -8.51  | -2.24  | 0.001   | Male |
| Ireland           | 2003           | 2012           | -0.07  | -0.78  | 0.64   | 0.831   | Male |
| Israel            | 1979           | 1988           | -2.49* | -3.37  | -1.6   | < 0.001 | Male |
| Italy             | 2001           | 2010           | -2.62* | -4.57  | -0.63  | 0.01    | Male |
| Japan             | 2001           | 2010           | 0.89*  | 0.41   | 1.38   | 0.002   | Male |
| Republic of Korea | 2003           | 2012           | -1.50* | -2.4   | -0.58  | 0.001   | Male |
| Lithuania         | 2003           | 2012           | 1.68*  | 1.09   | 2.28   | < 0.001 | Male |
| Malta             | 2003           | 2012           | -0.29  | -3.05  | 2.56   | 0.832   | Male |
| Netherlands       | 2003           | 2012           | 1.96*  | 0.66   | 3.28   | 0.003   | Male |
| New Zealand       | 2003           | 2012           | -0.04  | -0.54  | 0.45   | 0.858   | Male |
| Philippines       | 2003           | 2012           | -1.30* | -2.15  | -0.44  | 0.004   | Male |
| Poland            | 2003           | 2012           | -0.8   | -2.96  | 1.4    | 0.441   | Male |
| Slovenia          | 2003           | 2012           | -2.42* | -2.87  | -1.97  | < 0.001 | Male |
| Spain             | 2001           | 2010           | -2.05* | -2.51  | -1.59  | < 0.001 | Male |
| Switzerland       | 2003           | 2012           | -1.79* | -2.84  | -0.74  | 0.003   | Male |
| Turkey            | 2003           | 2012           | -3.23* | -5.45  | -0.95  | 0.011   | Male |
| Thailand          | 2003           | 2012           | 1.80*  | 0.4    | 3.22   | 0.017   | Male |
| Uganda            | 2003           | 2012           | 3.30*  | 1.17   | 5.48   | 0.004   | Male |

|                   |      |      |        |        |       |         |        |
|-------------------|------|------|--------|--------|-------|---------|--------|
| United Kingdom    | 2003 | 2012 | 1.10*  | 0.92   | 1.28  | < 0.001 | Male   |
| Denmark           | 2010 | 2019 | 0.89*  | 0.52   | 1.26  | < 0.001 | Male   |
| Finland           | 2010 | 2019 | 1.34*  | 0.89   | 1.78  | < 0.001 | Male   |
| Iceland           | 2010 | 2019 | 0.80*  | 0.13   | 1.48  | 0.021   | Male   |
| Norway            | 2010 | 2019 | 1.49*  | 1.22   | 1.76  | < 0.001 | Male   |
| Sweden            | 2010 | 2019 | -0.47  | -1.18  | 0.24  | 0.191   | Male   |
| USA               | 2009 | 2018 | -0.92* | -1.27  | -0.58 | < 0.001 | Male   |
| USA (White)       | 2009 | 2018 | -0.68* | -1.2   | -0.15 | 0.013   | Male   |
| USA (Black)       | 2009 | 2018 | -4.99* | -5.38  | -4.59 | < 0.001 | Male   |
| Australia         | 2003 | 2012 | -1.66* | -2.03  | -1.28 | < 0.001 | Female |
| Austria           | 2003 | 2012 | 1.54   | -0.43  | 3.54  | 0.115   | Female |
| Bahrain           | 2002 | 2012 | -4.81  | -13.23 | 4.42  | 0.268   | Female |
| Belarus           | 2003 | 2012 | -1.68* | -2.6   | -0.76 | 0.001   | Female |
| Brazil            | 2003 | 2012 | -3.53* | -6.02  | -0.97 | 0.01    | Female |
| Bulgaria          | 2003 | 2012 | 0.93   | -1.25  | 3.15  | 0.377   | Female |
| Canada            | 2003 | 2012 | -0.40* | -0.67  | -0.12 | 0.006   | Female |
| Chile             | 2003 | 2012 | -7.20* | -11.21 | -3.01 | 0.003   | Female |
| China             | 2003 | 2012 | -6.07* | -6.98  | -5.14 | < 0.001 | Female |
| Colombia          | 2003 | 2012 | -2.27* | -4.07  | -0.43 | 0.017   | Female |
| Costa Rica        | 2002 | 2011 | -3.65* | -4.95  | -2.34 | < 0.001 | Female |
| Croatia           | 2003 | 2012 | -1.09  | -2.42  | 0.26  | 0.109   | Female |
| Cyprus            | 2002 | 2012 | 1.62   | -6.32  | 10.22 | 0.672   | Female |
| Czech Republic    | 2003 | 2012 | 3.48*  | 2.69   | 4.28  | < 0.001 | Female |
| Ecuador           | 2003 | 2012 | -1.47  | -3.54  | 0.64  | 0.162   | Female |
| Estonia           | 2003 | 2012 | 0.52   | -0.97  | 2.04  | 0.482   | Female |
| France            | 2002 | 2011 | 0.77   | -0.73  | 2.3   | 0.287   | Female |
| Germany           | 2003 | 2012 | 1.66   | -0.07  | 3.41  | 0.058   | Female |
| Hong Kong SAR     | 2003 | 2012 | -4.83* | -5.32  | -4.33 | < 0.001 | Female |
| India             | 2003 | 2012 | -3.18* | -4.27  | -2.08 | < 0.001 | Female |
| Ireland           | 2003 | 2012 | -1.01* | -1.6   | -0.42 | 0.002   | Female |
| Israel            | 2003 | 2012 | -1.59* | -1.98  | -1.2  | < 0.001 | Female |
| Italy             | 2001 | 2010 | -0.21  | -2.08  | 1.69  | 0.808   | Female |
| Japan             | 2001 | 2010 | 2.20*  | 1.26   | 3.14  | < 0.001 | Female |
| Republic of Korea | 2003 | 2012 | -2.22* | -4.19  | -0.22 | 0.033   | Female |
| Lithuania         | 2003 | 2012 | 3.27   | -6.7   | 14.3  | 0.535   | Female |
| Malta             | 2002 | 2012 | -1.51  | -5.35  | 2.48  | 0.429   | Female |
| Netherlands       | 2003 | 2012 | 1.97*  | 1.51   | 2.43  | < 0.001 | Female |
| New Zealand       | 2003 | 2012 | -0.72* | -1.34  | -0.09 | 0.026   | Female |
| Philippines       | 2003 | 2012 | -5.22* | -6.2   | -4.24 | < 0.001 | Female |
| Poland            | 2003 | 2012 | -2.26  | -7.51  | 3.3   | 0.389   | Female |

|                |      |      |        |       |       |         |        |
|----------------|------|------|--------|-------|-------|---------|--------|
| Slovenia       | 2003 | 2012 | -0.63  | -1.82 | 0.57  | 0.288   | Female |
| Spain          | 2001 | 2010 | 1.61*  | 0.39  | 2.84  | 0.013   | Female |
| Switzerland    | 2003 | 2012 | 1.5    | -0.38 | 3.42  | 0.109   | Female |
| Turkey         | 2003 | 2012 | 1.02   | -1.28 | 3.36  | 0.359   | Female |
| Thailand       | 2003 | 2012 | -5.58* | -7.3  | -3.84 | < 0.001 | Female |
| Uganda         | 2003 | 2012 | 0.4    | -2.11 | 2.96  | 0.747   | Female |
| United Kingdom | 2003 | 2012 | -0.15  | -0.38 | 0.07  | 0.166   | Female |
| Denmark        | 2010 | 2019 | 0.88*  | 0.32  | 1.45  | 0.003   | Female |
| Finland        | 2010 | 2019 | 0.62   | -0.53 | 1.79  | 0.283   | Female |
| Iceland        | 2010 | 2019 | -2.24* | -2.89 | -1.58 | < 0.001 | Female |
| Norway         | 2010 | 2019 | 1.67*  | 1.33  | 2.01  | < 0.001 | Female |
| Sweden         | 2010 | 2019 | 0.54*  | 0.21  | 0.86  | 0.001   | Female |
| USA            | 2009 | 2018 | -0.96* | -1.12 | -0.8  | < 0.001 | Female |
| USA (White)    | 2009 | 2018 | -0.42* | -0.59 | -0.25 | < 0.001 | Female |
| USA (Black)    | 2009 | 2018 | -3.67* | -4.09 | -3.24 | < 0.001 | Female |

\**P* values less than 0.05.

Table S4. The AAPC of the incidence of oesophageal cancer in individuals older than 50 years old.

| Country           | Lower endpoint | Upper endpoint | AAPC    | Low95  | High95 | Pvalue  | Sex  |
|-------------------|----------------|----------------|---------|--------|--------|---------|------|
| Australia         | 2003           | 2012           | 0.27    | 0      | 0.55   | 0.05    | Male |
| Austria           | 2003           | 2012           | 0.09    | -0.79  | 0.98   | 0.821   | Male |
| Bahrain           | 2002           | 2012           | -15.45* | -20.66 | -9.89  | < 0.001 | Male |
| Belarus           | 2003           | 2012           | 1.25*   | 0.92   | 1.58   | < 0.001 | Male |
| Brazil            | 2003           | 2012           | -2.36*  | -4.03  | -0.66  | 0.009   | Male |
| Bulgaria          | 2003           | 2012           | 1.96*   | 0.33   | 3.63   | 0.022   | Male |
| Canada            | 2003           | 2012           | 1.54*   | 0.62   | 2.47   | 0.001   | Male |
| Chile             | 2003           | 2012           | -3.13*  | -5.52  | -0.68  | 0.016   | Male |
| China             | 2003           | 2012           | -3.95*  | -4.56  | -3.33  | < 0.001 | Male |
| Colombia          | 2003           | 2012           | -2.70*  | -4.36  | -1.02  | 0.003   | Male |
| Costa Rica        | 2002           | 2011           | -2.13*  | -2.86  | -1.4   | < 0.001 | Male |
| Croatia           | 2003           | 2012           | -0.98*  | -1.6   | -0.35  | 0.004   | Male |
| Cyprus            | 2003           | 2012           | 1.64    | -4.93  | 8.66   | 0.608   | Male |
| Czech Republic    | 2003           | 2012           | 1.42*   | 0.8    | 2.04   | < 0.001 | Male |
| Ecuador           | 2003           | 2012           | -2.85*  | -4.4   | -1.28  | 0.001   | Male |
| Estonia           | 2003           | 2012           | 0.59    | -0.16  | 1.34   | 0.117   | Male |
| France            | 2002           | 2011           | -2.88*  | -3.66  | -2.09  | < 0.001 | Male |
| Germany           | 2003           | 2012           | 0.84    | -0.12  | 1.81   | 0.08    | Male |
| Hong Kong SAR     | 2003           | 2012           | -4.29*  | -4.51  | -4.08  | < 0.001 | Male |
| India             | 2003           | 2012           | -4.79*  | -7.16  | -2.36  | < 0.001 | Male |
| Ireland           | 2003           | 2012           | -0.07   | -0.78  | 0.64   | 0.828   | Male |
| Israel            | 2003           | 2012           | -2.58*  | -3.77  | -1.37  | < 0.001 | Male |
| Italy             | 2001           | 2010           | -3.19*  | -4.08  | -2.3   | < 0.001 | Male |
| Japan             | 2001           | 2010           | 1.11*   | 0.62   | 1.59   | < 0.001 | Male |
| Republic of Korea | 2003           | 2012           | -1.67*  | -2.67  | -0.66  | 0.001   | Male |
| Lithuania         | 2003           | 2012           | 1.93*   | 1.38   | 2.48   | < 0.001 | Male |
| Malta             | 2003           | 2012           | -0.77   | -3.56  | 2.1    | 0.577   | Male |
| Netherlands       | 2003           | 2012           | 2.08*   | 0.79   | 3.38   | 0.002   | Male |
| New Zealand       | 2003           | 2012           | -0.15   | -0.65  | 0.35   | 0.543   | Male |
| Philippines       | 2003           | 2012           | -1.51*  | -2.31  | -0.71  | 0.001   | Male |
| Poland            | 2003           | 2012           | -0.17   | -2.53  | 2.25   | 0.883   | Male |
| Slovenia          | 2003           | 2012           | -2.26*  | -2.79  | -1.74  | < 0.001 | Male |
| Spain             | 2001           | 2010           | -1.47*  | -1.81  | -1.14  | < 0.001 | Male |
| Switzerland       | 2003           | 2012           | -1.32*  | -2.53  | -0.1   | 0.036   | Male |
| Turkey            | 2003           | 2012           | -0.96   | -2.77  | 0.88   | 0.276   | Male |
| Thailand          | 2003           | 2012           | 0.08    | -0.74  | 0.92   | 0.835   | Male |
| Uganda            | 2003           | 2012           | 3.30*   | 1.1    | 5.54   | 0.005   | Male |
| United Kingdom    | 2003           | 2012           | 1.15*   | 0.99   | 1.31   | < 0.001 | Male |

|                   |      |      |        |        |       |         |        |
|-------------------|------|------|--------|--------|-------|---------|--------|
| Denmark           | 2010 | 2019 | 1.04*  | 0.59   | 1.49  | < 0.001 | Male   |
| Finland           | 2010 | 2019 | 1.39*  | 0.92   | 1.86  | < 0.001 | Male   |
| Iceland           | 2010 | 2019 | 0.1    | -0.34  | 0.55  | 0.648   | Male   |
| Norway            | 2010 | 2019 | 1.39*  | 1.13   | 1.66  | < 0.001 | Male   |
| Sweden            | 2010 | 2019 | 0.43*  | 0.32   | 0.54  | < 0.001 | Male   |
| USA               | 2009 | 2018 | -0.88* | -1.27  | -0.5  | < 0.001 | Male   |
| USA (White)       | 2009 | 2018 | -0.66* | -1.18  | -0.14 | 0.015   | Male   |
| USA (Black)       | 2009 | 2018 | -4.77* | -5.22  | -4.33 | < 0.001 | Male   |
| Australia         | 2003 | 2012 | -1.76* | -2.14  | -1.38 | < 0.001 | Female |
| Austria           | 2003 | 2012 | 1.59*  | 0.03   | 3.18  | 0.047   | Female |
| Bahrain           | 2002 | 2012 | -4.25  | -13.09 | 5.5   | 0.349   | Female |
| Belarus           | 2003 | 2012 | -2.05* | -2.85  | -1.25 | < 0.001 | Female |
| Brazil            | 2003 | 2012 | -9.78  | -18.75 | 0.17  | 0.054   | Female |
| Bulgaria          | 2003 | 2012 | 0.62   | -1.35  | 2.63  | 0.512   | Female |
| Canada            | 2003 | 2012 | -0.39* | -0.67  | -0.11 | 0.008   | Female |
| Chile             | 2003 | 2012 | -7.19* | -11.4  | -2.77 | 0.004   | Female |
| China             | 2003 | 2012 | -5.99* | -6.9   | -5.07 | < 0.001 | Female |
| Colombia          | 2003 | 2012 | -2.34* | -4.19  | -0.45 | 0.017   | Female |
| Costa Rica        | 2002 | 2011 | -3.69* | -5.01  | -2.36 | < 0.001 | Female |
| Croatia           | 2003 | 2012 | -0.71  | -2     | 0.59  | 0.268   | Female |
| Cyprus            | 2002 | 2012 | 1      | -7.6   | 10.39 | 0.811   | Female |
| Czech Republic    | 2003 | 2012 | 3.37*  | 2.66   | 4.09  | < 0.001 | Female |
| Ecuador           | 2003 | 2012 | -1.75  | -4.2   | 0.76  | 0.163   | Female |
| Estonia           | 2003 | 2012 | 0.54   | -1.04  | 2.14  | 0.492   | Female |
| France            | 2002 | 2011 | 0.95   | -0.42  | 2.34  | 0.159   | Female |
| Germany           | 2003 | 2012 | 1.70*  | 0.28   | 3.13  | 0.022   | Female |
| Hong Kong SAR     | 2003 | 2012 | -4.62* | -5.14  | -4.09 | < 0.001 | Female |
| India             | 2003 | 2012 | -2.98* | -4.14  | -1.8  | < 0.001 | Female |
| Ireland           | 2003 | 2012 | -0.88* | -1.59  | -0.16 | 0.019   | Female |
| Israel            | 2003 | 2012 | -1.70* | -2.1   | -1.29 | < 0.001 | Female |
| Italy             | 2001 | 2010 | -0.28  | -2.02  | 1.5   | 0.738   | Female |
| Japan             | 2001 | 2010 | 2.26*  | 1.4    | 3.12  | < 0.001 | Female |
| Republic of Korea | 2003 | 2012 | -1.14  | -4.92  | 2.78  | 0.563   | Female |
| Lithuania         | 2003 | 2012 | 1.61*  | 0.48   | 2.75  | 0.007   | Female |
| Malta             | 2002 | 2012 | -2.25  | -6.62  | 2.32  | 0.307   | Female |
| Netherlands       | 2003 | 2012 | 2.30*  | 1.89   | 2.71  | < 0.001 | Female |
| New Zealand       | 2003 | 2012 | -0.75* | -1.43  | -0.07 | 0.031   | Female |
| Philippines       | 2003 | 2012 | -5.53* | -6.54  | -4.5  | < 0.001 | Female |
| Poland            | 2003 | 2012 | -1.8   | -7.55  | 4.31  | 0.528   | Female |
| Slovenia          | 2003 | 2012 | -0.51  | -1.6   | 0.59  | 0.346   | Female |
| Spain             | 2001 | 2010 | 4.47*  | 1.36   | 7.68  | 0.005   | Female |
| Switzerland       | 2003 | 2012 | 1.57   | -0.16  | 3.33  | 0.072   | Female |

|                |      |      |        |       |       |         |        |
|----------------|------|------|--------|-------|-------|---------|--------|
| Turkey         | 2003 | 2012 | 0.41   | -2.05 | 2.93  | 0.729   | Female |
| Thailand       | 2003 | 2012 | -5.61* | -7.21 | -3.99 | < 0.001 | Female |
| Uganda         | 2003 | 2012 | 0.75   | -1.84 | 3.41  | 0.553   | Female |
| United Kingdom | 2003 | 2012 | -0.16  | -0.39 | 0.07  | 0.156   | Female |
| Denmark        | 2010 | 2019 | 1.11*  | 0.54  | 1.68  | < 0.001 | Female |
| Finland        | 2010 | 2019 | 0.48   | -0.71 | 1.69  | 0.422   | Female |
| Iceland        | 2010 | 2019 | -2.32* | -2.95 | -1.68 | < 0.001 | Female |
| Norway         | 2010 | 2019 | 1.57*  | 1.21  | 1.94  | < 0.001 | Female |
| Sweden         | 2010 | 2019 | 0.54*  | 0.22  | 0.87  | 0.002   | Female |
| USA            | 2009 | 2018 | -1.22* | -1.49 | -0.95 | < 0.001 | Female |
| USA (White)    | 2009 | 2018 | -0.45* | -0.64 | -0.27 | < 0.001 | Female |
| USA (Black)    | 2009 | 2018 | -3.60* | -4.09 | -3.12 | < 0.001 | Female |

\**P* values less than 0.05.

Table S5. The AAPC of the incidence of oesophageal cancer in individuals younger than 50 years old.

| Country           | Lower endpoint | Upper endpoint | AAPC   | Low95  | High95 | Pvalue  | Sex  |
|-------------------|----------------|----------------|--------|--------|--------|---------|------|
| Australia         | 2003           | 2012           | 1.28*  | 0.04   | 2.54   | 0.044   | Male |
| Austria           | 2003           | 2012           | -1.44  | -5.26  | 2.55   | 0.444   | Male |
| Bahrain           | 1998           | 2012           | -5.78* | -9.79  | -1.58  | 0.019   | Male |
| Belarus           | 2003           | 2012           | 0.42   | -1.14  | 2      | 0.583   | Male |
| Brazil            | 2003           | 2012           | -2.43  | -5.7   | 0.95   | 0.147   | Male |
| Bulgaria          | 2003           | 2012           | 0.57   | -1.76  | 2.95   | 0.61    | Male |
| Canada            | 2003           | 2012           | 1.55*  | 0.77   | 2.35   | < 0.001 | Male |
| Chile             | 1998           | 2011           | 1.77   | -3.27  | 7.09   | 0.44    | Male |
| China             | 2003           | 2012           | -2.43* | -4.25  | -0.58  | 0.014   | Male |
| Colombia          | 2000           | 2012           | -2.19  | -5.22  | 0.93   | 0.157   | Male |
| Costa Rica        | 1995           | 2008           | -2.26  | -5.17  | 0.73   | 0.129   | Male |
| Croatia           | 2003           | 2012           | -2.73* | -4.21  | -1.23  | 0.001   | Male |
| Czech Republic    | 2003           | 2012           | -2.84* | -4.46  | -1.19  | 0.002   | Male |
| Ecuador           | 1996           | 2012           | -2.85* | -4.56  | -1.12  | 0.003   | Male |
| Estonia           | 2003           | 2012           | -2.23* | -4.23  | -0.19  | 0.034   | Male |
| France            | 2002           | 2011           | -7.22* | -8.8   | -5.61  | < 0.001 | Male |
| Germany           | 2003           | 2012           | -2.25  | -6.52  | 2.22   | 0.292   | Male |
| Hong Kong SAR     | 2003           | 2012           | -5.98* | -6.69  | -5.26  | < 0.001 | Male |
| India             | 2003           | 2012           | -1.92* | -3.12  | -0.71  | 0.003   | Male |
| Ireland           | 2003           | 2012           | -0.49  | -3.2   | 2.29   | 0.71    | Male |
| Israel            | 2003           | 2012           | 0.4    | -0.54  | 1.35   | 0.394   | Male |
| Italy             | 2001           | 2010           | -2.93  | -7.13  | 1.46   | 0.167   | Male |
| Japan             | 2001           | 2010           | -2.88* | -5.51  | -0.18  | 0.039   | Male |
| Republic of Korea | 2003           | 2012           | -1.91  | -4.68  | 0.94   | 0.168   | Male |
| Lithuania         | 2003           | 2012           | -0.26  | -1.84  | 1.34   | 0.735   | Male |
| Malta             |                |                |        |        |        |         | Male |
| Netherlands       | 2003           | 2012           | 0.99*  | 0.15   | 1.83   | 0.022   | Male |
| New Zealand       | 2003           | 2012           | 1.6    | -0.1   | 3.34   | 0.065   | Male |
| Philippines       | 2003           | 2012           | 0.01   | -2.84  | 2.95   | 0.995   | Male |
| Spain             | 2001           | 2010           | -5.77* | -7.55  | -3.97  | < 0.001 | Male |
| Switzerland       | 2003           | 2012           | -6.60* | -10.91 | -2.07  | 0.008   | Male |
| Turkey            | 2003           | 2012           | -2.17  | -5.79  | 1.59   | 0.231   | Male |
| Thailand          | 2003           | 2012           | 6.18*  | 3.67   | 8.77   | < 0.001 | Male |
| Uganda            | 2003           | 2012           | 3.35   | -3.67  | 10.88  | 0.359   | Male |
| United Kingdom    | 2003           | 2012           | 0.36   | -0.46  | 1.18   | 0.368   | Male |
| Denmark           | 2010           | 2019           | -3.59* | -6.15  | -0.96  | 0.008   | Male |
| Finland           | 2010           | 2019           | 1.39*  | 0.49   | 2.31   | 0.003   | Male |
| Norway            | 2010           | 2019           | 2.10*  | 1.55   | 2.65   | < 0.001 | Male |

|                   |      |      |        |        |       |         |        |
|-------------------|------|------|--------|--------|-------|---------|--------|
| Sweden            | 2010 | 2019 | -2.13  | -4.54  | 0.34  | 0.089   | Male   |
| USA               | 2009 | 2018 | -0.64* | -0.97  | -0.3  | < 0.001 | Male   |
| USA (White)       | 2009 | 2018 | -0.55  | -1.63  | 0.54  | 0.316   | Male   |
| USA (Black)       | 2009 | 2018 | 5.31   | -13.33 | 27.96 | 0.603   | Male   |
| Australia         | 2002 | 2012 | 2.13   | -0.53  | 4.86  | 0.11    | Female |
| Austria           | 1999 | 2012 | 2.26   | -4.53  | 9.54  | 0.48    | Female |
| Bahrain           | 2001 | 2010 | -4.3   | -11.14 | 3.07  | 0.084   | Female |
| Belarus           | 1984 | 2012 | -0.00* | 0      | 0     | < 0.001 | Female |
| Brazil            | 1996 | 2012 | -0.27  | -5.16  | 4.88  | 0.908   | Female |
| Bulgaria          | 2002 | 2012 | -0.82  | -5.4   | 3.97  | 0.707   | Female |
| Canada            | 2002 | 2012 | -1.19* | -2.03  | -0.35 | 0.007   | Female |
| Chile             | 1998 | 2011 | -7.24  | -20.48 | 8.2   | 0.171   | Female |
| China             | 2001 | 2012 | -5.22* | -8.84  | -1.45 | 0.012   | Female |
| Colombia          | 1998 | 2012 | -3.54* | -6.6   | -0.37 | 0.031   | Female |
| Costa Rica        | 1985 | 2010 | -2.66* | -5.11  | -0.15 | 0.04    | Female |
| Croatia           | 1998 | 2012 | -2.8   | -5.52  | 0     | 0.05    | Female |
| Czech Republic    | 2002 | 2012 | 0.52   | -0.68  | 1.74  | 0.38    | Female |
| Ecuador           | 1989 | 2012 | -1.54  | -5.85  | 2.97  | 0.453   | Female |
| Estonia           | 1985 | 2012 | 2.22*  | 0.25   | 4.23  | 0.031   | Female |
| France            | 2002 | 2011 | -0.35  | -5.09  | 4.62  | 0.877   | Female |
| Germany           | 2003 | 2012 | 0.41   | -5.02  | 6.15  | 0.877   | Female |
| Hong Kong SAR     | 2000 | 2012 | 5.41   | -2.01  | 13.4  | 0.147   | Female |
| India             | 2003 | 2012 | -3.49* | -4.37  | -2.59 | < 0.001 | Female |
| Ireland           | 2003 | 2012 | -2.32  | -5.34  | 0.79  | 0.132   | Female |
| Israel            | 1999 | 2012 | -2.14* | -3.09  | -1.18 | < 0.001 | Female |
| Italy             | 2001 | 2010 | -1.12  | -7.05  | 5.19  | 0.696   | Female |
| Japan             | 2001 | 2010 | 2.15   | -3.21  | 7.81  | 0.404   | Female |
| Republic of Korea | 1999 | 2012 | 0      | 0      | 0     | 0.688   | Female |
| Lithuania         | 2001 | 2012 | 4.04*  | 1.81   | 6.32  | 0.001   | Female |
| Netherlands       | 2003 | 2012 | -1.57* | -2.92  | -0.2  | 0.027   | Female |
| New Zealand       | 1999 | 2012 | -0.75  | -2.81  | 1.36  | 0.466   | Female |
| Philippines       | 1999 | 2012 | -3.49* | -5.63  | -1.31 | 0.004   | Female |
| Spain             | 2001 | 2010 | -1.18  | -4.98  | 2.77  | 0.529   | Female |
| Switzerland       | 2002 | 2012 | -1.3   | -8.52  | 6.49  | 0.709   | Female |
| Turkey            | 2003 | 2012 | 2.25   | -3.78  | 8.65  | 0.443   | Female |
| Thailand          | 1996 | 2011 | -1.48  | -4.18  | 1.28  | 0.26    | Female |
| Uganda            | 2003 | 2012 | -2.92  | -6.94  | 1.27  | 0.157   | Female |
| United Kingdom    | 2003 | 2012 | -1.26  | -3.54  | 1.07  | 0.266   | Female |
| Denmark           | 2009 | 2019 | 1.17*  | 0.43   | 1.91  | 0.002   | Female |
| Finland           | 2010 | 2019 | -1.08  | -2.5   | 0.37  | 0.14    | Female |
| Norway            | 2009 | 2019 | 0.88   | 0      | 1.77  | 0.051   | Female |



|             |      |      |        |       |       |         |        |
|-------------|------|------|--------|-------|-------|---------|--------|
| Sweden      | 2010 | 2019 | 0.07   | -0.67 | 0.82  | 0.853   | Female |
| USA         | 2009 | 2018 | -3.72* | -6.01 | -1.38 | 0.003   | Female |
| USA (White) | 2009 | 2018 | -3.63* | -6.86 | -0.28 | 0.035   | Female |
| USA (Black) | 2008 | 2018 | -4.17* | -5.22 | -3.1  | < 0.001 | Female |

---

\**P* values less than 0.05.

Table S6. The mortality ASR and correlated 95%CI.

| sex  | Year | ASR | CI95_low | CI95_high | Country   |
|------|------|-----|----------|-----------|-----------|
| Male | 1979 | 4.0 | 3.5      | 4.4       | Australia |
| Male | 1980 | 4.0 | 3.6      | 4.4       | Australia |
| Male | 1981 | 3.9 | 3.5      | 4.4       | Australia |
| Male | 1982 | 3.8 | 3.4      | 4.2       | Australia |
| Male | 1983 | 4.0 | 3.6      | 4.4       | Australia |
| Male | 1984 | 4.3 | 3.9      | 4.7       | Australia |
| Male | 1985 | 4.3 | 3.9      | 4.7       | Australia |
| Male | 1986 | 3.9 | 3.6      | 4.3       | Australia |
| Male | 1987 | 4.3 | 3.9      | 4.7       | Australia |
| Male | 1988 | 4.7 | 4.3      | 5.1       | Australia |
| Male | 1989 | 4.7 | 4.3      | 5.1       | Australia |
| Male | 1990 | 4.5 | 4.1      | 4.9       | Australia |
| Male | 1991 | 4.5 | 4.1      | 4.9       | Australia |
| Male | 1992 | 4.7 | 4.3      | 5.1       | Australia |
| Male | 1993 | 4.4 | 4.0      | 4.8       | Australia |
| Male | 1994 | 4.6 | 4.2      | 5.0       | Australia |
| Male | 1995 | 4.7 | 4.3      | 5.0       | Australia |
| Male | 1996 | 4.4 | 4.1      | 4.8       | Australia |
| Male | 1997 | 4.8 | 4.4      | 5.1       | Australia |
| Male | 1998 | 4.5 | 4.1      | 4.8       | Australia |
| Male | 1999 | 4.3 | 4.0      | 4.6       | Australia |
| Male | 2000 | 4.5 | 4.1      | 4.8       | Australia |
| Male | 2001 | 4.4 | 4.1      | 4.7       | Australia |
| Male | 2002 | 4.3 | 3.9      | 4.6       | Australia |
| Male | 2003 | 4.7 | 4.4      | 5.0       | Australia |
| Male | 2004 | 4.6 | 4.3      | 4.9       | Australia |
| Male | 2006 | 4.6 | 4.2      | 4.9       | Australia |
| Male | 2007 | 4.3 | 4.0      | 4.6       | Australia |
| Male | 2008 | 4.3 | 4.1      | 4.6       | Australia |
| Male | 2009 | 4.1 | 3.9      | 4.4       | Australia |
| Male | 2010 | 4.5 | 4.2      | 4.8       | Australia |
| Male | 2011 | 4.2 | 4.0      | 4.5       | Australia |
| Male | 2012 | 4.0 | 3.8      | 4.3       | Australia |
| Male | 2013 | 4.1 | 3.8      | 4.4       | Australia |
| Male | 2014 | 3.8 | 3.5      | 4.0       | Australia |
| Male | 2015 | 4.0 | 3.7      | 4.2       | Australia |
| Male | 2016 | 4.1 | 3.9      | 4.4       | Australia |
| Male | 2017 | 3.8 | 3.6      | 4.1       | Australia |
| Male | 2018 | 3.8 | 3.6      | 4.1       | Australia |
| Male | 1980 | 3.4 | 3.0      | 3.9       | Austria   |
| Male | 1981 | 3.8 | 3.3      | 4.4       | Austria   |
| Male | 1982 | 3.4 | 2.9      | 3.9       | Austria   |
| Male | 1983 | 3.9 | 3.4      | 4.5       | Austria   |
| Male | 1984 | 3.5 | 3.0      | 4.0       | Austria   |

|      |      |     |     |     |         |
|------|------|-----|-----|-----|---------|
| Male | 1985 | 3.6 | 3.1 | 4.1 | Austria |
| Male | 1986 | 3.4 | 2.9 | 3.9 | Austria |
| Male | 1987 | 3.4 | 2.9 | 3.9 | Austria |
| Male | 1988 | 3.3 | 2.8 | 3.8 | Austria |
| Male | 1989 | 3.5 | 3.0 | 3.9 | Austria |
| Male | 1990 | 3.6 | 3.0 | 4.1 | Austria |
| Male | 1991 | 3.8 | 3.3 | 4.3 | Austria |
| Male | 1992 | 3.5 | 3.0 | 4.0 | Austria |
| Male | 1993 | 3.4 | 2.9 | 3.9 | Austria |
| Male | 1994 | 3.3 | 2.8 | 3.8 | Austria |
| Male | 1995 | 3.8 | 3.3 | 4.3 | Austria |
| Male | 1996 | 3.7 | 3.2 | 4.2 | Austria |
| Male | 1997 | 3.6 | 3.1 | 4.1 | Austria |
| Male | 1998 | 3.7 | 3.2 | 4.2 | Austria |
| Male | 1999 | 3.9 | 3.4 | 4.4 | Austria |
| Male | 2000 | 3.4 | 2.9 | 3.8 | Austria |
| Male | 2001 | 3.8 | 3.4 | 4.3 | Austria |
| Male | 2002 | 4.0 | 3.5 | 4.5 | Austria |
| Male | 2003 | 3.4 | 3.0 | 3.9 | Austria |
| Male | 2004 | 3.5 | 3.1 | 4.0 | Austria |
| Male | 2005 | 3.6 | 3.1 | 4.0 | Austria |
| Male | 2006 | 3.8 | 3.4 | 4.3 | Austria |
| Male | 2007 | 3.6 | 3.2 | 4.1 | Austria |
| Male | 2008 | 3.9 | 3.5 | 4.4 | Austria |
| Male | 2009 | 3.6 | 3.1 | 4.0 | Austria |
| Male | 2010 | 3.4 | 3.0 | 3.8 | Austria |
| Male | 2011 | 3.3 | 2.9 | 3.7 | Austria |
| Male | 2012 | 3.6 | 3.2 | 4.0 | Austria |
| Male | 2013 | 3.5 | 3.1 | 3.9 | Austria |
| Male | 2014 | 3.4 | 3.0 | 3.7 | Austria |
| Male | 2015 | 3.1 | 2.7 | 3.5 | Austria |
| Male | 2016 | 3.1 | 2.8 | 3.5 | Austria |
| Male | 2017 | 3.5 | 3.1 | 3.8 | Austria |
| Male | 2018 | 3.5 | 3.1 | 3.9 | Austria |
| Male | 2019 | 2.9 | 2.5 | 3.2 | Austria |
| Male | 1981 | 2.7 | 2.2 | 3.2 | Belarus |
| Male | 1982 | 3.2 | 2.7 | 3.7 | Belarus |
| Male | 1985 | 3.7 | 3.2 | 4.3 | Belarus |
| Male | 1986 | 3.9 | 3.3 | 4.4 | Belarus |
| Male | 1987 | 4.0 | 3.4 | 4.5 | Belarus |
| Male | 1988 | 4.7 | 4.1 | 5.2 | Belarus |
| Male | 1989 | 4.7 | 4.1 | 5.3 | Belarus |
| Male | 1990 | 5.2 | 4.6 | 5.8 | Belarus |
| Male | 1991 | 5.1 | 4.5 | 5.7 | Belarus |
| Male | 1992 | 5.5 | 4.9 | 6.1 | Belarus |
| Male | 1993 | 5.7 | 5.0 | 6.3 | Belarus |

|      |      |     |     |     |         |
|------|------|-----|-----|-----|---------|
| Male | 1994 | 5.3 | 4.7 | 5.9 | Belarus |
| Male | 1995 | 5.7 | 5.1 | 6.3 | Belarus |
| Male | 1997 | 5.1 | 4.6 | 5.7 | Belarus |
| Male | 1998 | 4.9 | 4.3 | 5.4 | Belarus |
| Male | 1999 | 5.8 | 5.2 | 6.5 | Belarus |
| Male | 2000 | 4.9 | 4.3 | 5.5 | Belarus |
| Male | 2001 | 5.2 | 4.6 | 5.8 | Belarus |
| Male | 2002 | 5.5 | 4.9 | 6.1 | Belarus |
| Male | 2003 | 5.2 | 4.6 | 5.8 | Belarus |
| Male | 2007 | 5.2 | 4.7 | 5.8 | Belarus |
| Male | 2008 | 5.5 | 4.9 | 6.1 | Belarus |
| Male | 2009 | 5.8 | 5.2 | 6.4 | Belarus |
| Male | 2010 | 5.1 | 4.6 | 5.7 | Belarus |
| Male | 2011 | 5.7 | 5.1 | 6.3 | Belarus |
| Male | 2013 | 5.6 | 5.0 | 6.2 | Belarus |
| Male | 2014 | 5.4 | 4.9 | 6.0 | Belarus |
| Male | 2018 | 5.9 | 5.3 | 6.5 | Belarus |
| Male | 1979 | 3.8 | 3.3 | 4.2 | Belgium |
| Male | 1980 | 4.2 | 3.8 | 4.7 | Belgium |
| Male | 1981 | 3.6 | 3.2 | 4.1 | Belgium |
| Male | 1982 | 3.8 | 3.4 | 4.3 | Belgium |
| Male | 1983 | 4.3 | 3.8 | 4.8 | Belgium |
| Male | 1984 | 4.2 | 3.7 | 4.6 | Belgium |
| Male | 1985 | 4.4 | 3.9 | 4.8 | Belgium |
| Male | 1986 | 4.2 | 3.7 | 4.6 | Belgium |
| Male | 1987 | 4.8 | 4.3 | 5.3 | Belgium |
| Male | 1988 | 4.4 | 3.9 | 4.8 | Belgium |
| Male | 1989 | 4.5 | 4.0 | 5.0 | Belgium |
| Male | 1990 | 4.6 | 4.1 | 5.1 | Belgium |
| Male | 1991 | 4.2 | 3.8 | 4.7 | Belgium |
| Male | 1992 | 4.3 | 3.8 | 4.7 | Belgium |
| Male | 1993 | 5.0 | 4.5 | 5.5 | Belgium |
| Male | 1994 | 5.2 | 4.8 | 5.7 | Belgium |
| Male | 1995 | 5.2 | 4.7 | 5.6 | Belgium |
| Male | 1996 | 5.0 | 4.5 | 5.5 | Belgium |
| Male | 1997 | 5.3 | 4.8 | 5.8 | Belgium |
| Male | 1998 | 5.5 | 5.0 | 6.0 | Belgium |
| Male | 1999 | 5.0 | 4.6 | 5.5 | Belgium |
| Male | 2000 | 5.0 | 4.6 | 5.5 | Belgium |
| Male | 2001 | 4.9 | 4.4 | 5.3 | Belgium |
| Male | 2002 | 5.1 | 4.6 | 5.5 | Belgium |
| Male | 2003 | 5.0 | 4.5 | 5.4 | Belgium |
| Male | 2004 | 5.2 | 4.8 | 5.7 | Belgium |
| Male | 2005 | 5.0 | 4.5 | 5.4 | Belgium |
| Male | 2006 | 4.7 | 4.3 | 5.1 | Belgium |
| Male | 2007 | 5.1 | 4.6 | 5.5 | Belgium |

|      |      |     |     |     |         |
|------|------|-----|-----|-----|---------|
| Male | 2008 | 5.1 | 4.7 | 5.6 | Belgium |
| Male | 2009 | 4.8 | 4.4 | 5.2 | Belgium |
| Male | 2010 | 5.0 | 4.6 | 5.4 | Belgium |
| Male | 2011 | 4.6 | 4.2 | 5.0 | Belgium |
| Male | 2012 | 4.9 | 4.4 | 5.3 | Belgium |
| Male | 2013 | 5.4 | 5.0 | 5.8 | Belgium |
| Male | 2014 | 4.9 | 4.5 | 5.3 | Belgium |
| Male | 2015 | 4.9 | 4.5 | 5.3 | Belgium |
| Male | 2016 | 4.9 | 4.5 | 5.3 | Belgium |
| Male | 1979 | 6.7 | 6.4 | 7.0 | Brazil  |
| Male | 1980 | 7.1 | 6.8 | 7.3 | Brazil  |
| Male | 1981 | 6.8 | 6.6 | 7.1 | Brazil  |
| Male | 1982 | 6.6 | 6.3 | 6.8 | Brazil  |
| Male | 1983 | 6.5 | 6.3 | 6.8 | Brazil  |
| Male | 1984 | 6.4 | 6.1 | 6.6 | Brazil  |
| Male | 1985 | 6.6 | 6.4 | 6.9 | Brazil  |
| Male | 1986 | 6.5 | 6.2 | 6.7 | Brazil  |
| Male | 1987 | 6.8 | 6.6 | 7.1 | Brazil  |
| Male | 1988 | 6.8 | 6.6 | 7.1 | Brazil  |
| Male | 1989 | 6.5 | 6.3 | 6.8 | Brazil  |
| Male | 1990 | 6.4 | 6.2 | 6.6 | Brazil  |
| Male | 1991 | 6.3 | 6.0 | 6.5 | Brazil  |
| Male | 1992 | 6.6 | 6.4 | 6.8 | Brazil  |
| Male | 1993 | 6.5 | 6.3 | 6.7 | Brazil  |
| Male | 1994 | 6.4 | 6.2 | 6.6 | Brazil  |
| Male | 1995 | 6.1 | 5.9 | 6.3 | Brazil  |
| Male | 1996 | 6.6 | 6.4 | 6.8 | Brazil  |
| Male | 1997 | 6.4 | 6.2 | 6.6 | Brazil  |
| Male | 1998 | 6.4 | 6.2 | 6.6 | Brazil  |
| Male | 1999 | 6.2 | 6.0 | 6.4 | Brazil  |
| Male | 2000 | 6.3 | 6.1 | 6.5 | Brazil  |
| Male | 2001 | 6.2 | 6.0 | 6.3 | Brazil  |
| Male | 2002 | 6.3 | 6.1 | 6.5 | Brazil  |
| Male | 2003 | 6.3 | 6.1 | 6.4 | Brazil  |
| Male | 2004 | 6.5 | 6.3 | 6.7 | Brazil  |
| Male | 2005 | 6.3 | 6.2 | 6.5 | Brazil  |
| Male | 2006 | 6.4 | 6.3 | 6.6 | Brazil  |
| Male | 2007 | 6.3 | 6.1 | 6.5 | Brazil  |
| Male | 2008 | 6.3 | 6.1 | 6.5 | Brazil  |
| Male | 2009 | 6.2 | 6.1 | 6.4 | Brazil  |
| Male | 2010 | 6.3 | 6.1 | 6.4 | Brazil  |
| Male | 2011 | 6.1 | 6.0 | 6.3 | Brazil  |
| Male | 2012 | 5.9 | 5.8 | 6.1 | Brazil  |
| Male | 2013 | 6.0 | 5.8 | 6.1 | Brazil  |
| Male | 2014 | 5.8 | 5.7 | 6.0 | Brazil  |
| Male | 2015 | 5.8 | 5.7 | 6.0 | Brazil  |

|      |      |     |     |     |          |
|------|------|-----|-----|-----|----------|
| Male | 2016 | 5.6 | 5.5 | 5.8 | Brazil   |
| Male | 2017 | 5.6 | 5.4 | 5.7 | Brazil   |
| Male | 2018 | 5.5 | 5.4 | 5.6 | Brazil   |
| Male | 2019 | 5.4 | 5.2 | 5.5 | Brazil   |
| Male | 1980 | 1.0 | 0.7 | 1.2 | Bulgaria |
| Male | 1981 | 1.2 | 0.9 | 1.4 | Bulgaria |
| Male | 1982 | 1.4 | 1.1 | 1.7 | Bulgaria |
| Male | 1983 | 1.1 | 0.8 | 1.3 | Bulgaria |
| Male | 1984 | 1.2 | 1.0 | 1.5 | Bulgaria |
| Male | 1985 | 1.3 | 1.0 | 1.6 | Bulgaria |
| Male | 1986 | 1.6 | 1.3 | 1.9 | Bulgaria |
| Male | 1987 | 1.8 | 1.5 | 2.1 | Bulgaria |
| Male | 1988 | 1.6 | 1.3 | 1.9 | Bulgaria |
| Male | 1989 | 3.1 | 2.7 | 3.5 | Bulgaria |
| Male | 1990 | 3.0 | 2.6 | 3.5 | Bulgaria |
| Male | 1991 | 4.8 | 4.3 | 5.4 | Bulgaria |
| Male | 1992 | 2.8 | 2.4 | 3.2 | Bulgaria |
| Male | 1993 | 3.7 | 3.3 | 4.2 | Bulgaria |
| Male | 1994 | 2.6 | 2.2 | 3.0 | Bulgaria |
| Male | 1995 | 3.6 | 3.1 | 4.1 | Bulgaria |
| Male | 1996 | 2.9 | 2.5 | 3.3 | Bulgaria |
| Male | 1997 | 3.2 | 2.7 | 3.6 | Bulgaria |
| Male | 1998 | 2.9 | 2.5 | 3.3 | Bulgaria |
| Male | 1999 | 2.6 | 2.2 | 3.0 | Bulgaria |
| Male | 2000 | 2.0 | 1.7 | 2.4 | Bulgaria |
| Male | 2001 | 1.8 | 1.5 | 2.2 | Bulgaria |
| Male | 2002 | 1.9 | 1.6 | 2.3 | Bulgaria |
| Male | 2003 | 1.9 | 1.6 | 2.2 | Bulgaria |
| Male | 2004 | 1.9 | 1.6 | 2.3 | Bulgaria |
| Male | 2005 | 2.4 | 2.0 | 2.8 | Bulgaria |
| Male | 2006 | 2.4 | 2.0 | 2.8 | Bulgaria |
| Male | 2007 | 2.2 | 1.8 | 2.5 | Bulgaria |
| Male | 2008 | 2.4 | 2.0 | 2.8 | Bulgaria |
| Male | 2009 | 2.3 | 2.0 | 2.7 | Bulgaria |
| Male | 2010 | 2.2 | 1.9 | 2.6 | Bulgaria |
| Male | 2011 | 2.3 | 1.9 | 2.6 | Bulgaria |
| Male | 2012 | 2.4 | 2.0 | 2.7 | Bulgaria |
| Male | 2013 | 2.4 | 2.0 | 2.7 | Bulgaria |
| Male | 2014 | 2.2 | 1.8 | 2.5 | Bulgaria |
| Male | 2015 | 2.5 | 2.1 | 2.9 | Bulgaria |
| Male | 2016 | 2.1 | 1.8 | 2.5 | Bulgaria |
| Male | 2017 | 2.1 | 1.7 | 2.4 | Bulgaria |
| Male | 2018 | 2.5 | 2.1 | 2.9 | Bulgaria |
| Male | 1979 | 3.5 | 3.2 | 3.8 | Canada   |
| Male | 1980 | 3.3 | 3.0 | 3.6 | Canada   |
| Male | 1981 | 3.5 | 3.2 | 3.8 | Canada   |

|      |      |     |     |      |        |
|------|------|-----|-----|------|--------|
| Male | 1982 | 3.4 | 3.1 | 3.7  | Canada |
| Male | 1983 | 3.8 | 3.5 | 4.2  | Canada |
| Male | 1984 | 4.0 | 3.7 | 4.3  | Canada |
| Male | 1985 | 4.0 | 3.7 | 4.3  | Canada |
| Male | 1986 | 3.7 | 3.4 | 4.0  | Canada |
| Male | 1987 | 4.1 | 3.8 | 4.4  | Canada |
| Male | 1988 | 4.2 | 3.8 | 4.5  | Canada |
| Male | 1989 | 3.7 | 3.4 | 4.0  | Canada |
| Male | 1990 | 4.1 | 3.8 | 4.4  | Canada |
| Male | 1991 | 4.0 | 3.7 | 4.2  | Canada |
| Male | 1992 | 4.2 | 3.9 | 4.5  | Canada |
| Male | 1993 | 4.0 | 3.8 | 4.3  | Canada |
| Male | 1994 | 4.2 | 3.9 | 4.5  | Canada |
| Male | 1995 | 4.1 | 3.9 | 4.4  | Canada |
| Male | 1996 | 4.2 | 4.0 | 4.5  | Canada |
| Male | 1997 | 4.4 | 4.1 | 4.7  | Canada |
| Male | 1998 | 4.4 | 4.1 | 4.7  | Canada |
| Male | 1999 | 4.2 | 4.0 | 4.5  | Canada |
| Male | 2000 | 4.5 | 4.2 | 4.8  | Canada |
| Male | 2001 | 4.2 | 4.0 | 4.5  | Canada |
| Male | 2002 | 4.3 | 4.1 | 4.6  | Canada |
| Male | 2003 | 4.1 | 3.8 | 4.3  | Canada |
| Male | 2004 | 4.3 | 4.0 | 4.6  | Canada |
| Male | 2005 | 4.3 | 4.0 | 4.5  | Canada |
| Male | 2006 | 4.2 | 4.0 | 4.5  | Canada |
| Male | 2007 | 4.4 | 4.1 | 4.6  | Canada |
| Male | 2008 | 4.6 | 4.3 | 4.8  | Canada |
| Male | 2009 | 4.1 | 3.9 | 4.3  | Canada |
| Male | 2010 | 4.3 | 4.1 | 4.6  | Canada |
| Male | 2011 | 4.1 | 3.8 | 4.3  | Canada |
| Male | 2012 | 4.1 | 3.9 | 4.3  | Canada |
| Male | 2013 | 4.2 | 4.0 | 4.4  | Canada |
| Male | 2014 | 4.2 | 4.0 | 4.4  | Canada |
| Male | 2015 | 4.0 | 3.8 | 4.2  | Canada |
| Male | 2016 | 3.9 | 3.7 | 4.1  | Canada |
| Male | 2017 | 4.1 | 3.9 | 4.3  | Canada |
| Male | 2018 | 4.0 | 3.8 | 4.2  | Canada |
| Male | 2019 | 4.0 | 3.9 | 4.2  | Canada |
| Male | 1980 | 9.2 | 8.3 | 10.2 | Chile  |
| Male | 1981 | 8.4 | 7.5 | 9.3  | Chile  |
| Male | 1982 | 8.2 | 7.3 | 9.0  | Chile  |
| Male | 1983 | 8.0 | 7.1 | 8.8  | Chile  |
| Male | 1984 | 7.8 | 7.0 | 8.6  | Chile  |
| Male | 1985 | 7.7 | 7.0 | 8.5  | Chile  |
| Male | 1986 | 7.6 | 6.8 | 8.4  | Chile  |
| Male | 1987 | 7.4 | 6.6 | 8.1  | Chile  |

|      |      |     |     |     |          |
|------|------|-----|-----|-----|----------|
| Male | 1988 | 7.3 | 6.5 | 8.0 | Chile    |
| Male | 1989 | 7.1 | 6.4 | 7.9 | Chile    |
| Male | 1990 | 6.4 | 5.7 | 7.0 | Chile    |
| Male | 1991 | 7.3 | 6.6 | 8.0 | Chile    |
| Male | 1992 | 7.0 | 6.3 | 7.6 | Chile    |
| Male | 1993 | 6.7 | 6.1 | 7.4 | Chile    |
| Male | 1994 | 6.4 | 5.8 | 7.0 | Chile    |
| Male | 1995 | 6.1 | 5.5 | 6.7 | Chile    |
| Male | 1996 | 6.5 | 5.9 | 7.1 | Chile    |
| Male | 1997 | 6.0 | 5.4 | 6.6 | Chile    |
| Male | 1998 | 5.7 | 5.2 | 6.3 | Chile    |
| Male | 1999 | 5.8 | 5.2 | 6.3 | Chile    |
| Male | 2000 | 5.9 | 5.4 | 6.5 | Chile    |
| Male | 2001 | 5.5 | 5.0 | 6.0 | Chile    |
| Male | 2002 | 5.3 | 4.8 | 5.8 | Chile    |
| Male | 2003 | 5.4 | 4.9 | 5.9 | Chile    |
| Male | 2004 | 4.5 | 4.1 | 4.9 | Chile    |
| Male | 2005 | 4.6 | 4.2 | 5.1 | Chile    |
| Male | 2006 | 4.5 | 4.1 | 4.9 | Chile    |
| Male | 2007 | 4.1 | 3.7 | 4.5 | Chile    |
| Male | 2008 | 4.0 | 3.7 | 4.4 | Chile    |
| Male | 2009 | 3.8 | 3.4 | 4.2 | Chile    |
| Male | 2010 | 3.4 | 3.1 | 3.7 | Chile    |
| Male | 2011 | 3.5 | 3.2 | 3.8 | Chile    |
| Male | 2012 | 3.1 | 2.8 | 3.4 | Chile    |
| Male | 2013 | 2.9 | 2.6 | 3.2 | Chile    |
| Male | 2014 | 2.7 | 2.5 | 3.0 | Chile    |
| Male | 2015 | 2.6 | 2.3 | 2.9 | Chile    |
| Male | 2016 | 2.7 | 2.4 | 3.0 | Chile    |
| Male | 2017 | 2.5 | 2.3 | 2.8 | Chile    |
| Male | 2018 | 2.5 | 2.2 | 2.7 | Chile    |
| Male | 1984 | 4.3 | 3.9 | 4.8 | Colombia |
| Male | 1985 | 4.6 | 4.1 | 5.0 | Colombia |
| Male | 1986 | 3.9 | 3.5 | 4.3 | Colombia |
| Male | 1987 | 4.0 | 3.6 | 4.4 | Colombia |
| Male | 1988 | 3.2 | 2.9 | 3.6 | Colombia |
| Male | 1989 | 3.0 | 2.7 | 3.4 | Colombia |
| Male | 1990 | 3.6 | 3.2 | 4.0 | Colombia |
| Male | 1991 | 3.2 | 2.9 | 3.6 | Colombia |
| Male | 1992 | 3.3 | 3.0 | 3.6 | Colombia |
| Male | 1993 | 3.1 | 2.8 | 3.4 | Colombia |
| Male | 1994 | 3.1 | 2.8 | 3.4 | Colombia |
| Male | 1995 | 2.8 | 2.5 | 3.1 | Colombia |
| Male | 1996 | 3.1 | 2.8 | 3.4 | Colombia |
| Male | 1997 | 2.8 | 2.5 | 3.1 | Colombia |
| Male | 1998 | 2.7 | 2.5 | 3.0 | Colombia |



|      |      |     |     |     |            |
|------|------|-----|-----|-----|------------|
| Male | 1999 | 2.9 | 2.6 | 3.2 | Colombia   |
| Male | 2000 | 2.8 | 2.6 | 3.1 | Colombia   |
| Male | 2001 | 2.7 | 2.5 | 3.0 | Colombia   |
| Male | 2002 | 2.6 | 2.3 | 2.8 | Colombia   |
| Male | 2003 | 2.5 | 2.3 | 2.8 | Colombia   |
| Male | 2004 | 2.5 | 2.3 | 2.7 | Colombia   |
| Male | 2005 | 2.4 | 2.2 | 2.6 | Colombia   |
| Male | 2006 | 2.4 | 2.2 | 2.6 | Colombia   |
| Male | 2007 | 2.3 | 2.0 | 2.5 | Colombia   |
| Male | 2008 | 2.2 | 2.0 | 2.4 | Colombia   |
| Male | 2009 | 2.2 | 2.0 | 2.4 | Colombia   |
| Male | 2010 | 2.0 | 1.8 | 2.1 | Colombia   |
| Male | 2011 | 1.8 | 1.7 | 2.0 | Colombia   |
| Male | 2012 | 1.7 | 1.5 | 1.9 | Colombia   |
| Male | 2013 | 1.9 | 1.7 | 2.0 | Colombia   |
| Male | 2014 | 1.7 | 1.5 | 1.8 | Colombia   |
| Male | 2015 | 1.7 | 1.6 | 1.9 | Colombia   |
| Male | 2016 | 1.6 | 1.5 | 1.7 | Colombia   |
| Male | 2017 | 1.6 | 1.4 | 1.7 | Colombia   |
| Male | 1980 | 3.0 | 1.7 | 4.3 | Costa Rica |
| Male | 1981 | 1.9 | 1.0 | 2.7 | Costa Rica |
| Male | 1982 | 0.7 | 0.1 | 1.3 | Costa Rica |
| Male | 1983 | 3.8 | 2.4 | 5.1 | Costa Rica |
| Male | 1984 | 3.4 | 2.1 | 4.6 | Costa Rica |
| Male | 1985 | 3.4 | 2.2 | 4.7 | Costa Rica |
| Male | 1986 | 3.2 | 2.1 | 4.3 | Costa Rica |
| Male | 1987 | 2.6 | 1.6 | 3.6 | Costa Rica |
| Male | 1988 | 2.8 | 1.8 | 3.8 | Costa Rica |
| Male | 1989 | 3.6 | 2.5 | 4.8 | Costa Rica |
| Male | 1990 | 2.7 | 1.8 | 3.6 | Costa Rica |
| Male | 1991 | 2.7 | 1.7 | 3.6 | Costa Rica |
| Male | 1992 | 3.1 | 2.2 | 4.1 | Costa Rica |
| Male | 1993 | 2.5 | 1.7 | 3.3 | Costa Rica |
| Male | 1994 | 3.0 | 2.0 | 4.0 | Costa Rica |
| Male | 1995 | 2.0 | 1.4 | 2.7 | Costa Rica |
| Male | 1996 | 2.8 | 2.0 | 3.7 | Costa Rica |
| Male | 1997 | 1.7 | 1.0 | 2.3 | Costa Rica |
| Male | 1998 | 1.8 | 1.2 | 2.4 | Costa Rica |
| Male | 1999 | 1.9 | 1.3 | 2.6 | Costa Rica |
| Male | 2000 | 1.5 | 1.0 | 2.1 | Costa Rica |
| Male | 2001 | 2.0 | 1.3 | 2.6 | Costa Rica |
| Male | 2002 | 1.6 | 1.1 | 2.2 | Costa Rica |
| Male | 2003 | 1.7 | 1.1 | 2.2 | Costa Rica |
| Male | 2004 | 1.6 | 1.1 | 2.2 | Costa Rica |
| Male | 2005 | 1.5 | 1.0 | 2.0 | Costa Rica |
| Male | 2006 | 2.3 | 1.6 | 2.9 | Costa Rica |

|      |      |     |       |     |                |
|------|------|-----|-------|-----|----------------|
| Male | 2007 | 1.5 | 1.0   | 2.0 | Costa Rica     |
| Male | 2008 | 1.4 | 0.9   | 1.8 | Costa Rica     |
| Male | 2009 | 1.0 | 0.6   | 1.4 | Costa Rica     |
| Male | 2010 | 1.3 | 0.9   | 1.7 | Costa Rica     |
| Male | 2011 | 1.2 | 0.8   | 1.6 | Costa Rica     |
| Male | 2012 | 1.7 | 1.3   | 2.2 | Costa Rica     |
| Male | 2013 | 1.5 | 1.0   | 2.0 | Costa Rica     |
| Male | 2014 | 1.1 | 0.7   | 1.4 | Costa Rica     |
| Male | 2015 | 0.9 | 0.6   | 1.2 | Costa Rica     |
| Male | 2016 | 1.1 | 0.8   | 1.5 | Costa Rica     |
| Male | 2017 | 1.3 | 0.9   | 1.6 | Costa Rica     |
| Male | 2018 | 1.0 | 0.7   | 1.3 | Costa Rica     |
| Male | 2019 | 1.1 | 0.8   | 1.5 | Costa Rica     |
| Male | 1999 | 0.2 | (0.2) | 0.6 | Cyprus         |
| Male | 2000 | 0.4 | (0.2) | 0.9 | Cyprus         |
| Male | 2004 | 0.8 | 0.2   | 1.5 | Cyprus         |
| Male | 2005 | 0.3 | (0.0) | 0.7 | Cyprus         |
| Male | 2006 | 1.6 | 0.7   | 2.5 | Cyprus         |
| Male | 2007 | 1.1 | 0.4   | 1.9 | Cyprus         |
| Male | 2008 | 1.1 | 0.5   | 1.8 | Cyprus         |
| Male | 2009 | 0.5 | 0.1   | 1.0 | Cyprus         |
| Male | 2010 | 0.6 | 0.0   | 1.2 | Cyprus         |
| Male | 2011 | 0.8 | 0.2   | 1.4 | Cyprus         |
| Male | 2012 | 1.2 | 0.4   | 2.0 | Cyprus         |
| Male | 2013 | 0.5 | 0.0   | 1.0 | Cyprus         |
| Male | 2014 | 1.3 | 0.6   | 2.1 | Cyprus         |
| Male | 2015 | 0.4 | 0.1   | 0.8 | Cyprus         |
| Male | 2016 | 0.7 | 0.2   | 1.2 | Cyprus         |
| Male | 2017 | 0.8 | 0.3   | 1.4 | Cyprus         |
| Male | 2018 | 0.4 | 0.0   | 0.9 | Cyprus         |
| Male | 1986 | 3.1 | 2.7   | 3.5 | Czech Republic |
| Male | 1987 | 3.6 | 3.1   | 4.0 | Czech Republic |
| Male | 1988 | 3.6 | 3.2   | 4.1 | Czech Republic |
| Male | 1989 | 3.8 | 3.3   | 4.2 | Czech Republic |
| Male | 1990 | 4.1 | 3.6   | 4.6 | Czech Republic |
| Male | 1991 | 4.0 | 3.5   | 4.5 | Czech Republic |
| Male | 1992 | 4.5 | 4.0   | 5.1 | Czech Republic |
| Male | 1993 | 4.4 | 3.9   | 4.9 | Czech Republic |
| Male | 1994 | 4.4 | 3.9   | 4.9 | Czech Republic |
| Male | 1995 | 4.7 | 4.2   | 5.2 | Czech Republic |
| Male | 1996 | 4.6 | 4.1   | 5.1 | Czech Republic |
| Male | 1997 | 5.0 | 4.5   | 5.6 | Czech Republic |
| Male | 1998 | 5.0 | 4.5   | 5.5 | Czech Republic |
| Male | 1999 | 4.3 | 3.8   | 4.7 | Czech Republic |
| Male | 2000 | 4.6 | 4.1   | 5.1 | Czech Republic |
| Male | 2001 | 4.2 | 3.7   | 4.6 | Czech Republic |

|      |      |     |     |     |                |
|------|------|-----|-----|-----|----------------|
| Male | 2002 | 4.5 | 4.0 | 5.0 | Czech Republic |
| Male | 2003 | 4.9 | 4.4 | 5.4 | Czech Republic |
| Male | 2004 | 4.5 | 4.1 | 5.0 | Czech Republic |
| Male | 2005 | 4.5 | 4.0 | 5.0 | Czech Republic |
| Male | 2006 | 4.7 | 4.2 | 5.1 | Czech Republic |
| Male | 2007 | 4.0 | 3.6 | 4.4 | Czech Republic |
| Male | 2008 | 4.2 | 3.8 | 4.7 | Czech Republic |
| Male | 2009 | 4.1 | 3.7 | 4.5 | Czech Republic |
| Male | 2010 | 4.4 | 4.0 | 4.9 | Czech Republic |
| Male | 2011 | 4.2 | 3.8 | 4.6 | Czech Republic |
| Male | 2012 | 4.5 | 4.1 | 5.0 | Czech Republic |
| Male | 2013 | 4.8 | 4.3 | 5.2 | Czech Republic |
| Male | 2014 | 4.4 | 4.0 | 4.8 | Czech Republic |
| Male | 2015 | 4.4 | 4.0 | 4.8 | Czech Republic |
| Male | 2016 | 4.1 | 3.7 | 4.5 | Czech Republic |
| Male | 2017 | 4.4 | 4.0 | 4.8 | Czech Republic |
| Male | 2018 | 4.3 | 3.9 | 4.7 | Czech Republic |
| Male | 2019 | 4.5 | 4.1 | 4.9 | Czech Republic |
| Male | 1979 | 1.9 | 1.4 | 2.4 | Ecuador        |
| Male | 1980 | 1.7 | 1.2 | 2.2 | Ecuador        |
| Male | 1981 | 2.1 | 1.6 | 2.7 | Ecuador        |
| Male | 1982 | 2.3 | 1.7 | 2.8 | Ecuador        |
| Male | 1983 | 2.6 | 2.0 | 3.2 | Ecuador        |
| Male | 1984 | 2.2 | 1.7 | 2.8 | Ecuador        |
| Male | 1985 | 2.2 | 1.7 | 2.8 | Ecuador        |
| Male | 1986 | 2.0 | 1.5 | 2.5 | Ecuador        |
| Male | 1987 | 1.9 | 1.5 | 2.4 | Ecuador        |
| Male | 1988 | 2.4 | 1.8 | 2.9 | Ecuador        |
| Male | 1989 | 2.3 | 1.8 | 2.8 | Ecuador        |
| Male | 1990 | 2.2 | 1.7 | 2.7 | Ecuador        |
| Male | 1991 | 2.0 | 1.5 | 2.4 | Ecuador        |
| Male | 1992 | 2.1 | 1.6 | 2.5 | Ecuador        |
| Male | 1993 | 1.9 | 1.4 | 2.3 | Ecuador        |
| Male | 1994 | 2.0 | 1.6 | 2.5 | Ecuador        |
| Male | 1995 | 0.9 | 0.6 | 1.2 | Ecuador        |
| Male | 1996 | 1.0 | 0.7 | 1.3 | Ecuador        |
| Male | 1997 | 1.7 | 1.3 | 2.0 | Ecuador        |
| Male | 1998 | 1.4 | 1.1 | 1.7 | Ecuador        |
| Male | 1999 | 1.3 | 1.0 | 1.6 | Ecuador        |
| Male | 2000 | 1.5 | 1.1 | 1.8 | Ecuador        |
| Male | 2001 | 0.9 | 0.7 | 1.2 | Ecuador        |
| Male | 2002 | 1.2 | 0.9 | 1.5 | Ecuador        |
| Male | 2003 | 1.1 | 0.8 | 1.3 | Ecuador        |
| Male | 2004 | 1.2 | 0.9 | 1.5 | Ecuador        |
| Male | 2005 | 1.3 | 1.0 | 1.5 | Ecuador        |
| Male | 2006 | 1.3 | 1.0 | 1.6 | Ecuador        |

|      |      |     |     |     |         |
|------|------|-----|-----|-----|---------|
| Male | 2007 | 0.7 | 0.5 | 0.9 | Ecuador |
| Male | 2008 | 1.0 | 0.8 | 1.3 | Ecuador |
| Male | 2009 | 1.1 | 0.9 | 1.4 | Ecuador |
| Male | 2010 | 0.9 | 0.7 | 1.1 | Ecuador |
| Male | 2011 | 0.8 | 0.6 | 1.0 | Ecuador |
| Male | 2012 | 1.1 | 0.9 | 1.3 | Ecuador |
| Male | 2013 | 0.9 | 0.7 | 1.2 | Ecuador |
| Male | 2014 | 0.9 | 0.7 | 1.1 | Ecuador |
| Male | 2015 | 1.0 | 0.8 | 1.2 | Ecuador |
| Male | 2016 | 0.9 | 0.7 | 1.1 | Ecuador |
| Male | 2017 | 1.1 | 0.9 | 1.4 | Ecuador |
| Male | 1981 | 3.1 | 1.8 | 4.3 | Estonia |
| Male | 1982 | 2.0 | 1.0 | 3.0 | Estonia |
| Male | 1985 | 4.3 | 2.8 | 5.7 | Estonia |
| Male | 1986 | 5.1 | 3.6 | 6.6 | Estonia |
| Male | 1987 | 4.3 | 2.9 | 5.7 | Estonia |
| Male | 1988 | 5.1 | 3.6 | 6.6 | Estonia |
| Male | 1989 | 5.1 | 3.6 | 6.6 | Estonia |
| Male | 1990 | 5.3 | 3.7 | 6.8 | Estonia |
| Male | 1991 | 5.5 | 3.9 | 7.0 | Estonia |
| Male | 1992 | 6.2 | 4.5 | 7.8 | Estonia |
| Male | 1993 | 5.9 | 4.3 | 7.6 | Estonia |
| Male | 1994 | 5.5 | 4.0 | 7.1 | Estonia |
| Male | 1995 | 3.9 | 2.6 | 5.2 | Estonia |
| Male | 1996 | 6.9 | 5.2 | 8.7 | Estonia |
| Male | 1997 | 5.3 | 3.8 | 6.8 | Estonia |
| Male | 1998 | 4.5 | 3.1 | 5.8 | Estonia |
| Male | 1999 | 4.9 | 3.4 | 6.3 | Estonia |
| Male | 2000 | 3.8 | 2.6 | 5.0 | Estonia |
| Male | 2001 | 4.7 | 3.4 | 6.1 | Estonia |
| Male | 2002 | 3.9 | 2.6 | 5.1 | Estonia |
| Male | 2003 | 3.9 | 2.7 | 5.2 | Estonia |
| Male | 2004 | 5.2 | 3.7 | 6.6 | Estonia |
| Male | 2005 | 5.2 | 3.8 | 6.6 | Estonia |
| Male | 2006 | 5.2 | 3.7 | 6.6 | Estonia |
| Male | 2007 | 3.8 | 2.6 | 5.1 | Estonia |
| Male | 2008 | 5.1 | 3.7 | 6.6 | Estonia |
| Male | 2009 | 5.5 | 4.0 | 7.0 | Estonia |
| Male | 2010 | 4.8 | 3.4 | 6.1 | Estonia |
| Male | 2011 | 5.0 | 3.6 | 6.4 | Estonia |
| Male | 2012 | 5.6 | 4.2 | 7.1 | Estonia |
| Male | 2013 | 3.0 | 2.0 | 4.0 | Estonia |
| Male | 2014 | 5.3 | 3.9 | 6.7 | Estonia |
| Male | 2015 | 5.9 | 4.4 | 7.4 | Estonia |
| Male | 2016 | 5.8 | 4.4 | 7.2 | Estonia |
| Male | 2017 | 5.1 | 3.8 | 6.4 | Estonia |

|      |      |      |      |      |         |
|------|------|------|------|------|---------|
| Male | 2018 | 5.5  | 4.1  | 6.9  | Estonia |
| Male | 2019 | 6.3  | 4.8  | 7.7  | Estonia |
| Male | 1979 | 13.4 | 13.0 | 13.7 | France  |
| Male | 1980 | 13.2 | 12.8 | 13.6 | France  |
| Male | 1981 | 12.7 | 12.3 | 13.1 | France  |
| Male | 1982 | 13.1 | 12.7 | 13.4 | France  |
| Male | 1983 | 12.5 | 12.2 | 12.9 | France  |
| Male | 1984 | 12.6 | 12.2 | 12.9 | France  |
| Male | 1985 | 12.1 | 11.7 | 12.5 | France  |
| Male | 1986 | 12.0 | 11.6 | 12.3 | France  |
| Male | 1987 | 11.7 | 11.4 | 12.0 | France  |
| Male | 1988 | 11.3 | 11.0 | 11.7 | France  |
| Male | 1989 | 11.1 | 10.8 | 11.4 | France  |
| Male | 1990 | 11.0 | 10.6 | 11.3 | France  |
| Male | 1991 | 10.5 | 10.2 | 10.8 | France  |
| Male | 1992 | 10.2 | 9.9  | 10.5 | France  |
| Male | 1993 | 9.7  | 9.4  | 10.0 | France  |
| Male | 1994 | 9.6  | 9.3  | 9.9  | France  |
| Male | 1995 | 9.2  | 8.9  | 9.4  | France  |
| Male | 1996 | 8.9  | 8.6  | 9.2  | France  |
| Male | 1997 | 8.2  | 7.9  | 8.5  | France  |
| Male | 1998 | 8.3  | 8.0  | 8.6  | France  |
| Male | 1999 | 8.1  | 7.9  | 8.4  | France  |
| Male | 2000 | 7.5  | 7.2  | 7.7  | France  |
| Male | 2001 | 7.1  | 6.9  | 7.4  | France  |
| Male | 2002 | 7.1  | 6.8  | 7.3  | France  |
| Male | 2003 | 6.7  | 6.4  | 6.9  | France  |
| Male | 2004 | 6.3  | 6.1  | 6.5  | France  |
| Male | 2005 | 6.2  | 6.0  | 6.5  | France  |
| Male | 2006 | 5.8  | 5.6  | 6.0  | France  |
| Male | 2007 | 5.7  | 5.5  | 5.9  | France  |
| Male | 2008 | 5.5  | 5.3  | 5.7  | France  |
| Male | 2009 | 5.3  | 5.1  | 5.5  | France  |
| Male | 2010 | 5.3  | 5.1  | 5.5  | France  |
| Male | 2011 | 4.9  | 4.7  | 5.1  | France  |
| Male | 2012 | 4.9  | 4.7  | 5.1  | France  |
| Male | 2013 | 4.5  | 4.4  | 4.7  | France  |
| Male | 2014 | 4.4  | 4.3  | 4.6  | France  |
| Male | 2015 | 4.4  | 4.3  | 4.6  | France  |
| Male | 2016 | 4.3  | 4.1  | 4.4  | France  |
| Male | 1990 | 4.7  | 4.5  | 4.9  | Germany |
| Male | 1991 | 4.9  | 4.7  | 5.1  | Germany |
| Male | 1992 | 4.9  | 4.7  | 5.1  | Germany |
| Male | 1993 | 5.0  | 4.8  | 5.1  | Germany |
| Male | 1994 | 4.9  | 4.8  | 5.1  | Germany |
| Male | 1995 | 5.0  | 4.8  | 5.2  | Germany |

|      |      |      |      |      |                  |
|------|------|------|------|------|------------------|
| Male | 1996 | 5.1  | 4.9  | 5.2  | Germany          |
| Male | 1997 | 5.0  | 4.9  | 5.2  | Germany          |
| Male | 1998 | 4.7  | 4.5  | 4.8  | Germany          |
| Male | 1999 | 4.7  | 4.6  | 4.9  | Germany          |
| Male | 2000 | 4.7  | 4.5  | 4.9  | Germany          |
| Male | 2001 | 4.8  | 4.6  | 5.0  | Germany          |
| Male | 2002 | 4.9  | 4.8  | 5.1  | Germany          |
| Male | 2003 | 4.8  | 4.7  | 5.0  | Germany          |
| Male | 2004 | 4.7  | 4.6  | 4.9  | Germany          |
| Male | 2005 | 4.8  | 4.7  | 5.0  | Germany          |
| Male | 2006 | 4.7  | 4.5  | 4.8  | Germany          |
| Male | 2007 | 4.6  | 4.5  | 4.8  | Germany          |
| Male | 2008 | 4.5  | 4.4  | 4.7  | Germany          |
| Male | 2009 | 4.6  | 4.4  | 4.7  | Germany          |
| Male | 2010 | 4.5  | 4.4  | 4.7  | Germany          |
| Male | 2011 | 4.6  | 4.5  | 4.7  | Germany          |
| Male | 2012 | 4.6  | 4.5  | 4.8  | Germany          |
| Male | 2013 | 4.8  | 4.6  | 4.9  | Germany          |
| Male | 2014 | 4.4  | 4.3  | 4.5  | Germany          |
| Male | 2015 | 4.5  | 4.4  | 4.7  | Germany          |
| Male | 2016 | 4.6  | 4.4  | 4.7  | Germany          |
| Male | 2017 | 4.3  | 4.2  | 4.5  | Germany          |
| Male | 2018 | 4.3  | 4.2  | 4.5  | Germany          |
| Male | 2019 | 4.5  | 4.3  | 4.6  | Germany          |
| Male | 1979 | 12.4 | 10.9 | 13.9 | Hong Kong, China |
| Male | 1980 | 13.1 | 11.6 | 14.6 | Hong Kong, China |
| Male | 1981 | 11.4 | 10.0 | 12.8 | Hong Kong, China |
| Male | 1982 | 11.1 | 9.8  | 12.5 | Hong Kong, China |
| Male | 1983 | 11.2 | 9.9  | 12.5 | Hong Kong, China |
| Male | 1984 | 11.1 | 9.8  | 12.4 | Hong Kong, China |
| Male | 1985 | 12.1 | 10.8 | 13.5 | Hong Kong, China |
| Male | 1986 | 11.5 | 10.2 | 12.8 | Hong Kong, China |
| Male | 1987 | 10.9 | 9.7  | 12.1 | Hong Kong, China |
| Male | 1988 | 10.7 | 9.5  | 11.9 | Hong Kong, China |
| Male | 1989 | 10.1 | 9.0  | 11.2 | Hong Kong, China |
| Male | 1990 | 9.8  | 8.7  | 10.9 | Hong Kong, China |
| Male | 1991 | 9.2  | 8.2  | 10.3 | Hong Kong, China |
| Male | 1992 | 9.0  | 8.0  | 10.1 | Hong Kong, China |
| Male | 1993 | 9.6  | 8.6  | 10.7 | Hong Kong, China |
| Male | 1994 | 8.3  | 7.4  | 9.3  | Hong Kong, China |
| Male | 1995 | 8.2  | 7.3  | 9.1  | Hong Kong, China |
| Male | 1996 | 7.7  | 6.8  | 8.5  | Hong Kong, China |
| Male | 1997 | 8.4  | 7.5  | 9.3  | Hong Kong, China |
| Male | 1998 | 7.0  | 6.2  | 7.8  | Hong Kong, China |
| Male | 1999 | 6.9  | 6.2  | 7.7  | Hong Kong, China |
| Male | 2000 | 7.2  | 6.4  | 7.9  | Hong Kong, China |

|      |      |     |     |     |                  |
|------|------|-----|-----|-----|------------------|
| Male | 2001 | 6.3 | 5.6 | 7.1 | Hong Kong, China |
| Male | 2002 | 6.1 | 5.4 | 6.8 | Hong Kong, China |
| Male | 2003 | 5.8 | 5.2 | 6.5 | Hong Kong, China |
| Male | 2004 | 5.1 | 4.5 | 5.7 | Hong Kong, China |
| Male | 2005 | 5.3 | 4.7 | 5.9 | Hong Kong, China |
| Male | 2006 | 5.0 | 4.4 | 5.6 | Hong Kong, China |
| Male | 2007 | 4.8 | 4.2 | 5.3 | Hong Kong, China |
| Male | 2008 | 4.5 | 4.0 | 5.1 | Hong Kong, China |
| Male | 2009 | 4.4 | 3.9 | 4.9 | Hong Kong, China |
| Male | 2010 | 4.2 | 3.7 | 4.7 | Hong Kong, China |
| Male | 2011 | 4.1 | 3.7 | 4.6 | Hong Kong, China |
| Male | 2012 | 3.6 | 3.1 | 4.0 | Hong Kong, China |
| Male | 2013 | 3.6 | 3.2 | 4.1 | Hong Kong, China |
| Male | 2014 | 3.5 | 3.1 | 3.9 | Hong Kong, China |
| Male | 2015 | 3.2 | 2.8 | 3.6 | Hong Kong, China |
| Male | 2016 | 3.5 | 3.1 | 4.0 | Hong Kong, China |
| Male | 2017 | 3.1 | 2.7 | 3.5 | Hong Kong, China |
| Male | 1979 | 5.1 | 4.1 | 6.0 | Ireland          |
| Male | 1980 | 5.8 | 4.8 | 6.8 | Ireland          |
| Male | 1981 | 5.6 | 4.7 | 6.6 | Ireland          |
| Male | 1982 | 5.9 | 4.9 | 7.0 | Ireland          |
| Male | 1983 | 6.4 | 5.3 | 7.5 | Ireland          |
| Male | 1984 | 5.6 | 4.7 | 6.6 | Ireland          |
| Male | 1985 | 6.3 | 5.2 | 7.4 | Ireland          |
| Male | 1986 | 5.8 | 4.8 | 6.8 | Ireland          |
| Male | 1987 | 6.3 | 5.2 | 7.3 | Ireland          |
| Male | 1988 | 7.1 | 6.0 | 8.3 | Ireland          |
| Male | 1989 | 6.7 | 5.6 | 7.8 | Ireland          |
| Male | 1990 | 7.2 | 6.1 | 8.3 | Ireland          |
| Male | 1991 | 7.6 | 6.5 | 8.7 | Ireland          |
| Male | 1992 | 7.2 | 6.0 | 8.3 | Ireland          |
| Male | 1993 | 7.6 | 6.5 | 8.6 | Ireland          |
| Male | 1994 | 8.4 | 7.3 | 9.6 | Ireland          |
| Male | 1995 | 6.5 | 5.5 | 7.5 | Ireland          |
| Male | 1996 | 7.9 | 6.7 | 9.0 | Ireland          |
| Male | 1997 | 8.3 | 7.1 | 9.4 | Ireland          |
| Male | 1998 | 7.7 | 6.6 | 8.8 | Ireland          |
| Male | 1999 | 7.5 | 6.4 | 8.6 | Ireland          |
| Male | 2000 | 8.3 | 7.1 | 9.4 | Ireland          |
| Male | 2001 | 6.7 | 5.8 | 7.7 | Ireland          |
| Male | 2002 | 7.2 | 6.2 | 8.2 | Ireland          |
| Male | 2003 | 7.5 | 6.5 | 8.5 | Ireland          |
| Male | 2004 | 7.4 | 6.4 | 8.5 | Ireland          |
| Male | 2005 | 6.2 | 5.3 | 7.1 | Ireland          |
| Male | 2006 | 6.5 | 5.6 | 7.4 | Ireland          |
| Male | 2007 | 6.7 | 5.8 | 7.6 | Ireland          |

|      |      |     |     |     |         |
|------|------|-----|-----|-----|---------|
| Male | 2008 | 7.7 | 6.8 | 8.7 | Ireland |
| Male | 2009 | 6.5 | 5.6 | 7.3 | Ireland |
| Male | 2010 | 6.2 | 5.3 | 7.0 | Ireland |
| Male | 2011 | 6.5 | 5.7 | 7.3 | Ireland |
| Male | 2012 | 6.1 | 5.3 | 6.9 | Ireland |
| Male | 2013 | 6.8 | 6.0 | 7.6 | Ireland |
| Male | 2014 | 6.9 | 6.0 | 7.7 | Ireland |
| Male | 2015 | 6.7 | 5.9 | 7.5 | Ireland |
| Male | 1979 | 1.7 | 1.2 | 2.2 | Israel  |
| Male | 1980 | 1.2 | 0.8 | 1.7 | Israel  |
| Male | 1981 | 1.6 | 1.1 | 2.1 | Israel  |
| Male | 1982 | 1.8 | 1.3 | 2.4 | Israel  |
| Male | 1983 | 1.4 | 1.0 | 1.9 | Israel  |
| Male | 1984 | 1.7 | 1.2 | 2.2 | Israel  |
| Male | 1985 | 1.6 | 1.1 | 2.1 | Israel  |
| Male | 1986 | 1.4 | 0.9 | 1.8 | Israel  |
| Male | 1987 | 1.3 | 0.8 | 1.7 | Israel  |
| Male | 1988 | 1.8 | 1.3 | 2.4 | Israel  |
| Male | 1989 | 1.4 | 0.9 | 1.8 | Israel  |
| Male | 1990 | 1.7 | 1.2 | 2.1 | Israel  |
| Male | 1991 | 1.5 | 1.1 | 1.9 | Israel  |
| Male | 1992 | 1.0 | 0.7 | 1.4 | Israel  |
| Male | 1993 | 1.5 | 1.1 | 1.8 | Israel  |
| Male | 1994 | 1.8 | 1.4 | 2.3 | Israel  |
| Male | 1995 | 1.8 | 1.3 | 2.2 | Israel  |
| Male | 1996 | 2.1 | 1.6 | 2.5 | Israel  |
| Male | 1997 | 1.5 | 1.1 | 1.9 | Israel  |
| Male | 1998 | 1.4 | 1.0 | 1.8 | Israel  |
| Male | 1999 | 1.5 | 1.1 | 1.9 | Israel  |
| Male | 2000 | 1.1 | 0.8 | 1.4 | Israel  |
| Male | 2001 | 1.6 | 1.2 | 2.0 | Israel  |
| Male | 2002 | 1.2 | 0.9 | 1.6 | Israel  |
| Male | 2003 | 2.0 | 1.5 | 2.4 | Israel  |
| Male | 2004 | 1.5 | 1.1 | 1.8 | Israel  |
| Male | 2005 | 1.7 | 1.4 | 2.1 | Israel  |
| Male | 2006 | 1.8 | 1.4 | 2.2 | Israel  |
| Male | 2007 | 1.2 | 0.9 | 1.6 | Israel  |
| Male | 2008 | 1.7 | 1.3 | 2.0 | Israel  |
| Male | 2009 | 1.3 | 1.0 | 1.6 | Israel  |
| Male | 2010 | 1.1 | 0.8 | 1.3 | Israel  |
| Male | 2011 | 1.3 | 1.0 | 1.6 | Israel  |
| Male | 2012 | 1.3 | 1.0 | 1.6 | Israel  |
| Male | 2013 | 1.4 | 1.1 | 1.7 | Israel  |
| Male | 2014 | 1.1 | 0.9 | 1.4 | Israel  |
| Male | 2015 | 1.3 | 1.0 | 1.6 | Israel  |
| Male | 2016 | 1.3 | 1.0 | 1.6 | Israel  |



|      |      |     |     |     |        |
|------|------|-----|-----|-----|--------|
| Male | 2017 | 1.2 | 0.9 | 1.4 | Israel |
| Male | 2018 | 0.8 | 0.6 | 1.0 | Israel |
| Male | 1979 | 4.6 | 4.4 | 4.8 | Italy  |
| Male | 1980 | 4.3 | 4.1 | 4.5 | Italy  |
| Male | 1981 | 4.7 | 4.5 | 4.9 | Italy  |
| Male | 1982 | 4.4 | 4.2 | 4.6 | Italy  |
| Male | 1983 | 4.6 | 4.4 | 4.8 | Italy  |
| Male | 1984 | 4.3 | 4.1 | 4.5 | Italy  |
| Male | 1985 | 4.5 | 4.3 | 4.7 | Italy  |
| Male | 1986 | 4.4 | 4.2 | 4.6 | Italy  |
| Male | 1987 | 4.2 | 4.0 | 4.4 | Italy  |
| Male | 1988 | 4.2 | 4.0 | 4.4 | Italy  |
| Male | 1989 | 4.1 | 3.9 | 4.3 | Italy  |
| Male | 1990 | 4.0 | 3.8 | 4.2 | Italy  |
| Male | 1991 | 3.9 | 3.7 | 4.0 | Italy  |
| Male | 1992 | 3.7 | 3.6 | 3.9 | Italy  |
| Male | 1993 | 3.7 | 3.6 | 3.9 | Italy  |
| Male | 1994 | 3.7 | 3.5 | 3.9 | Italy  |
| Male | 1995 | 3.4 | 3.2 | 3.6 | Italy  |
| Male | 1996 | 3.3 | 3.1 | 3.4 | Italy  |
| Male | 1997 | 3.1 | 2.9 | 3.2 | Italy  |
| Male | 1998 | 3.1 | 3.0 | 3.3 | Italy  |
| Male | 1999 | 3.2 | 3.0 | 3.4 | Italy  |
| Male | 2000 | 2.8 | 2.7 | 3.0 | Italy  |
| Male | 2001 | 2.9 | 2.8 | 3.1 | Italy  |
| Male | 2002 | 2.6 | 2.5 | 2.8 | Italy  |
| Male | 2003 | 2.5 | 2.4 | 2.6 | Italy  |
| Male | 2004 | 2.3 | 2.2 | 2.4 | Italy  |
| Male | 2005 | 2.2 | 2.1 | 2.3 | Italy  |
| Male | 2006 | 2.1 | 2.0 | 2.2 | Italy  |
| Male | 2007 | 2.2 | 2.0 | 2.3 | Italy  |
| Male | 2008 | 2.1 | 2.0 | 2.2 | Italy  |
| Male | 2009 | 2.1 | 1.9 | 2.2 | Italy  |
| Male | 2010 | 2.2 | 2.0 | 2.3 | Italy  |
| Male | 2011 | 2.0 | 1.9 | 2.1 | Italy  |
| Male | 2012 | 1.9 | 1.8 | 2.0 | Italy  |
| Male | 2013 | 1.9 | 1.8 | 2.0 | Italy  |
| Male | 2014 | 1.8 | 1.7 | 1.9 | Italy  |
| Male | 2015 | 1.8 | 1.7 | 1.9 | Italy  |
| Male | 2016 | 1.9 | 1.8 | 2.0 | Italy  |
| Male | 2017 | 1.8 | 1.7 | 1.9 | Italy  |
| Male | 1979 | 6.8 | 6.6 | 7.0 | Japan  |
| Male | 1980 | 6.7 | 6.5 | 6.9 | Japan  |
| Male | 1981 | 6.5 | 6.3 | 6.6 | Japan  |
| Male | 1982 | 6.5 | 6.3 | 6.7 | Japan  |
| Male | 1983 | 6.5 | 6.3 | 6.7 | Japan  |

|      |      |     |     |     |                   |
|------|------|-----|-----|-----|-------------------|
| Male | 1984 | 6.3 | 6.1 | 6.5 | Japan             |
| Male | 1985 | 6.4 | 6.2 | 6.6 | Japan             |
| Male | 1986 | 6.5 | 6.3 | 6.6 | Japan             |
| Male | 1987 | 6.7 | 6.5 | 6.8 | Japan             |
| Male | 1988 | 6.5 | 6.4 | 6.7 | Japan             |
| Male | 1989 | 6.5 | 6.4 | 6.7 | Japan             |
| Male | 1990 | 6.6 | 6.4 | 6.8 | Japan             |
| Male | 1991 | 6.7 | 6.5 | 6.8 | Japan             |
| Male | 1992 | 6.8 | 6.6 | 7.0 | Japan             |
| Male | 1993 | 6.8 | 6.6 | 6.9 | Japan             |
| Male | 1994 | 6.6 | 6.4 | 6.7 | Japan             |
| Male | 1995 | 6.8 | 6.6 | 7.0 | Japan             |
| Male | 1996 | 7.0 | 6.9 | 7.2 | Japan             |
| Male | 1997 | 7.2 | 7.0 | 7.3 | Japan             |
| Male | 1998 | 7.1 | 6.9 | 7.2 | Japan             |
| Male | 1999 | 7.1 | 6.9 | 7.2 | Japan             |
| Male | 2000 | 7.0 | 6.9 | 7.2 | Japan             |
| Male | 2001 | 7.1 | 7.0 | 7.3 | Japan             |
| Male | 2002 | 6.9 | 6.7 | 7.0 | Japan             |
| Male | 2003 | 7.0 | 6.8 | 7.1 | Japan             |
| Male | 2004 | 6.8 | 6.6 | 6.9 | Japan             |
| Male | 2005 | 6.5 | 6.4 | 6.7 | Japan             |
| Male | 2006 | 6.5 | 6.3 | 6.6 | Japan             |
| Male | 2007 | 6.5 | 6.4 | 6.7 | Japan             |
| Male | 2008 | 6.4 | 6.2 | 6.5 | Japan             |
| Male | 2009 | 6.2 | 6.0 | 6.3 | Japan             |
| Male | 2010 | 6.0 | 5.9 | 6.1 | Japan             |
| Male | 2011 | 5.9 | 5.8 | 6.0 | Japan             |
| Male | 2012 | 5.5 | 5.4 | 5.6 | Japan             |
| Male | 2013 | 5.3 | 5.2 | 5.4 | Japan             |
| Male | 2014 | 5.2 | 5.1 | 5.3 | Japan             |
| Male | 2015 | 5.1 | 5.0 | 5.2 | Japan             |
| Male | 2016 | 4.9 | 4.8 | 5.0 | Japan             |
| Male | 2017 | 4.7 | 4.6 | 4.8 | Japan             |
| Male | 2018 | 4.4 | 4.3 | 4.5 | Japan             |
| Male | 1985 | 5.3 | 4.9 | 5.7 | Republic of Korea |
| Male | 1986 | 5.0 | 4.6 | 5.4 | Republic of Korea |
| Male | 1987 | 6.0 | 5.6 | 6.4 | Republic of Korea |
| Male | 1988 | 6.0 | 5.6 | 6.4 | Republic of Korea |
| Male | 1989 | 6.2 | 5.8 | 6.6 | Republic of Korea |
| Male | 1990 | 7.1 | 6.7 | 7.5 | Republic of Korea |
| Male | 1991 | 6.7 | 6.3 | 7.1 | Republic of Korea |
| Male | 1992 | 6.8 | 6.3 | 7.2 | Republic of Korea |
| Male | 1993 | 7.0 | 6.6 | 7.4 | Republic of Korea |
| Male | 1994 | 7.1 | 6.7 | 7.5 | Republic of Korea |
| Male | 1995 | 7.4 | 7.0 | 7.9 | Republic of Korea |

|      |      |     |     |     |                   |
|------|------|-----|-----|-----|-------------------|
| Male | 1996 | 6.9 | 6.5 | 7.3 | Republic of Korea |
| Male | 1997 | 7.2 | 6.8 | 7.6 | Republic of Korea |
| Male | 1998 | 6.4 | 6.1 | 6.8 | Republic of Korea |
| Male | 1999 | 6.4 | 6.0 | 6.7 | Republic of Korea |
| Male | 2000 | 6.4 | 6.1 | 6.7 | Republic of Korea |
| Male | 2001 | 5.8 | 5.5 | 6.2 | Republic of Korea |
| Male | 2002 | 6.0 | 5.7 | 6.3 | Republic of Korea |
| Male | 2003 | 5.7 | 5.4 | 6.0 | Republic of Korea |
| Male | 2004 | 5.5 | 5.2 | 5.8 | Republic of Korea |
| Male | 2005 | 5.1 | 4.8 | 5.3 | Republic of Korea |
| Male | 2006 | 4.9 | 4.7 | 5.2 | Republic of Korea |
| Male | 2007 | 4.6 | 4.3 | 4.8 | Republic of Korea |
| Male | 2008 | 4.1 | 3.9 | 4.3 | Republic of Korea |
| Male | 2009 | 4.1 | 3.9 | 4.3 | Republic of Korea |
| Male | 2010 | 3.7 | 3.5 | 3.9 | Republic of Korea |
| Male | 2011 | 3.8 | 3.6 | 4.0 | Republic of Korea |
| Male | 2012 | 3.4 | 3.2 | 3.6 | Republic of Korea |
| Male | 2013 | 3.3 | 3.1 | 3.5 | Republic of Korea |
| Male | 2014 | 3.4 | 3.2 | 3.6 | Republic of Korea |
| Male | 2015 | 3.2 | 3.0 | 3.3 | Republic of Korea |
| Male | 2016 | 3.0 | 2.8 | 3.1 | Republic of Korea |
| Male | 2017 | 2.6 | 2.5 | 2.7 | Republic of Korea |
| Male | 2018 | 2.6 | 2.4 | 2.7 | Republic of Korea |
| Male | 2019 | 2.7 | 2.5 | 2.8 | Republic of Korea |
| Male | 1980 | 3.0 | 2.1 | 3.9 | Latvia            |
| Male | 1981 | 3.1 | 2.2 | 4.0 | Latvia            |
| Male | 1982 | 4.1 | 3.0 | 5.2 | Latvia            |
| Male | 1983 | 3.9 | 2.9 | 5.0 | Latvia            |
| Male | 1984 | 4.4 | 3.3 | 5.6 | Latvia            |
| Male | 1985 | 3.7 | 2.7 | 4.7 | Latvia            |
| Male | 1986 | 3.8 | 2.9 | 4.8 | Latvia            |
| Male | 1987 | 5.4 | 4.2 | 6.6 | Latvia            |
| Male | 1988 | 3.8 | 2.8 | 4.8 | Latvia            |
| Male | 1989 | 5.1 | 3.9 | 6.2 | Latvia            |
| Male | 1990 | 5.3 | 4.1 | 6.4 | Latvia            |
| Male | 1991 | 4.6 | 3.5 | 5.6 | Latvia            |
| Male | 1992 | 4.1 | 3.1 | 5.1 | Latvia            |
| Male | 1993 | 5.6 | 4.4 | 6.8 | Latvia            |
| Male | 1994 | 5.2 | 4.1 | 6.3 | Latvia            |
| Male | 1995 | 5.2 | 4.0 | 6.3 | Latvia            |
| Male | 1996 | 5.6 | 4.4 | 6.8 | Latvia            |
| Male | 1997 | 5.7 | 4.5 | 6.9 | Latvia            |
| Male | 1998 | 4.6 | 3.5 | 5.7 | Latvia            |
| Male | 1999 | 6.3 | 5.1 | 7.6 | Latvia            |
| Male | 2000 | 5.6 | 4.4 | 6.8 | Latvia            |
| Male | 2001 | 5.6 | 4.4 | 6.8 | Latvia            |

|      |      |     |     |     |             |
|------|------|-----|-----|-----|-------------|
| Male | 2002 | 4.7 | 3.6 | 5.8 | Latvia      |
| Male | 2003 | 6.1 | 4.8 | 7.3 | Latvia      |
| Male | 2004 | 5.5 | 4.3 | 6.6 | Latvia      |
| Male | 2005 | 5.6 | 4.4 | 6.8 | Latvia      |
| Male | 2006 | 5.9 | 4.6 | 7.1 | Latvia      |
| Male | 2007 | 5.7 | 4.5 | 6.9 | Latvia      |
| Male | 2008 | 5.6 | 4.4 | 6.7 | Latvia      |
| Male | 2009 | 6.4 | 5.2 | 7.7 | Latvia      |
| Male | 2010 | 7.4 | 6.1 | 8.8 | Latvia      |
| Male | 2011 | 6.2 | 5.0 | 7.5 | Latvia      |
| Male | 2012 | 6.5 | 5.3 | 7.8 | Latvia      |
| Male | 2013 | 6.7 | 5.4 | 8.0 | Latvia      |
| Male | 2014 | 7.4 | 6.0 | 8.7 | Latvia      |
| Male | 2015 | 6.4 | 5.2 | 7.7 | Latvia      |
| Male | 2016 | 5.2 | 4.1 | 6.3 | Latvia      |
| Male | 2017 | 6.4 | 5.2 | 7.7 | Latvia      |
| Male | 2018 | 6.1 | 4.9 | 7.3 | Latvia      |
| Male | 1979 | 3.1 | 2.7 | 3.4 | Netherlands |
| Male | 1980 | 2.8 | 2.5 | 3.1 | Netherlands |
| Male | 1981 | 3.1 | 2.8 | 3.4 | Netherlands |
| Male | 1982 | 3.4 | 3.0 | 3.8 | Netherlands |
| Male | 1983 | 3.6 | 3.2 | 3.9 | Netherlands |
| Male | 1984 | 3.7 | 3.3 | 4.1 | Netherlands |
| Male | 1985 | 3.9 | 3.6 | 4.3 | Netherlands |
| Male | 1986 | 4.1 | 3.7 | 4.5 | Netherlands |
| Male | 1987 | 4.0 | 3.6 | 4.4 | Netherlands |
| Male | 1988 | 4.5 | 4.1 | 4.9 | Netherlands |
| Male | 1989 | 4.6 | 4.2 | 5.0 | Netherlands |
| Male | 1990 | 5.1 | 4.7 | 5.6 | Netherlands |
| Male | 1991 | 4.9 | 4.4 | 5.3 | Netherlands |
| Male | 1992 | 5.5 | 5.0 | 5.9 | Netherlands |
| Male | 1993 | 5.2 | 4.8 | 5.6 | Netherlands |
| Male | 1994 | 5.8 | 5.3 | 6.2 | Netherlands |
| Male | 1995 | 6.0 | 5.5 | 6.4 | Netherlands |
| Male | 1996 | 6.1 | 5.7 | 6.6 | Netherlands |
| Male | 1997 | 5.7 | 5.3 | 6.1 | Netherlands |
| Male | 1998 | 5.7 | 5.3 | 6.1 | Netherlands |
| Male | 1999 | 6.5 | 6.0 | 6.9 | Netherlands |
| Male | 2000 | 6.8 | 6.3 | 7.3 | Netherlands |
| Male | 2001 | 6.3 | 5.9 | 6.8 | Netherlands |
| Male | 2002 | 6.4 | 6.0 | 6.8 | Netherlands |
| Male | 2003 | 7.0 | 6.6 | 7.4 | Netherlands |
| Male | 2004 | 6.6 | 6.2 | 7.1 | Netherlands |
| Male | 2005 | 6.9 | 6.5 | 7.3 | Netherlands |
| Male | 2006 | 7.1 | 6.6 | 7.5 | Netherlands |
| Male | 2007 | 7.2 | 6.8 | 7.6 | Netherlands |

|      |      |     |     |     |             |
|------|------|-----|-----|-----|-------------|
| Male | 2008 | 7.4 | 6.9 | 7.8 | Netherlands |
| Male | 2009 | 7.1 | 6.7 | 7.5 | Netherlands |
| Male | 2010 | 7.3 | 6.9 | 7.7 | Netherlands |
| Male | 2011 | 7.0 | 6.6 | 7.4 | Netherlands |
| Male | 2012 | 7.4 | 7.0 | 7.8 | Netherlands |
| Male | 2013 | 6.9 | 6.5 | 7.3 | Netherlands |
| Male | 2014 | 7.1 | 6.7 | 7.5 | Netherlands |
| Male | 2015 | 7.1 | 6.7 | 7.4 | Netherlands |
| Male | 2016 | 7.2 | 6.8 | 7.5 | Netherlands |
| Male | 2017 | 6.8 | 6.4 | 7.2 | Netherlands |
| Male | 2018 | 7.0 | 6.7 | 7.4 | Netherlands |
| Male | 1979 | 3.7 | 2.8 | 4.6 | New Zealand |
| Male | 1980 | 4.0 | 3.1 | 4.9 | New Zealand |
| Male | 1981 | 4.8 | 3.8 | 5.8 | New Zealand |
| Male | 1982 | 5.3 | 4.3 | 6.4 | New Zealand |
| Male | 1983 | 3.9 | 3.1 | 4.8 | New Zealand |
| Male | 1984 | 3.8 | 3.0 | 4.7 | New Zealand |
| Male | 1985 | 4.9 | 3.9 | 5.8 | New Zealand |
| Male | 1986 | 4.2 | 3.3 | 5.1 | New Zealand |
| Male | 1987 | 5.2 | 4.2 | 6.2 | New Zealand |
| Male | 1988 | 5.0 | 4.0 | 6.0 | New Zealand |
| Male | 1989 | 5.3 | 4.3 | 6.3 | New Zealand |
| Male | 1990 | 4.8 | 3.9 | 5.7 | New Zealand |
| Male | 1991 | 4.9 | 4.0 | 5.8 | New Zealand |
| Male | 1992 | 4.8 | 3.9 | 5.7 | New Zealand |
| Male | 1993 | 5.7 | 4.7 | 6.6 | New Zealand |
| Male | 1994 | 5.5 | 4.5 | 6.4 | New Zealand |
| Male | 1995 | 5.7 | 4.8 | 6.6 | New Zealand |
| Male | 1996 | 4.8 | 3.9 | 5.6 | New Zealand |
| Male | 1997 | 5.6 | 4.7 | 6.5 | New Zealand |
| Male | 1998 | 3.9 | 3.1 | 4.6 | New Zealand |
| Male | 1999 | 3.7 | 3.0 | 4.4 | New Zealand |
| Male | 2000 | 4.3 | 3.6 | 5.1 | New Zealand |
| Male | 2001 | 4.3 | 3.6 | 5.0 | New Zealand |
| Male | 2002 | 3.6 | 2.9 | 4.2 | New Zealand |
| Male | 2003 | 3.9 | 3.2 | 4.5 | New Zealand |
| Male | 2004 | 4.1 | 3.4 | 4.8 | New Zealand |
| Male | 2005 | 3.7 | 3.0 | 4.3 | New Zealand |
| Male | 2006 | 3.9 | 3.2 | 4.6 | New Zealand |
| Male | 2007 | 4.5 | 3.8 | 5.2 | New Zealand |
| Male | 2008 | 4.0 | 3.4 | 4.7 | New Zealand |
| Male | 2009 | 4.1 | 3.5 | 4.7 | New Zealand |
| Male | 2010 | 3.4 | 2.8 | 4.0 | New Zealand |
| Male | 2011 | 4.4 | 3.8 | 5.1 | New Zealand |
| Male | 2012 | 3.8 | 3.2 | 4.3 | New Zealand |
| Male | 2013 | 3.6 | 3.0 | 4.1 | New Zealand |

|      |      |     |     |     |             |
|------|------|-----|-----|-----|-------------|
| Male | 2014 | 4.1 | 3.5 | 4.7 | New Zealand |
| Male | 2015 | 3.9 | 3.3 | 4.5 | New Zealand |
| Male | 2016 | 3.1 | 2.6 | 3.6 | New Zealand |
| Male | 1992 | 1.2 | 1.0 | 1.3 | Philippines |
| Male | 1993 | 1.4 | 1.2 | 1.5 | Philippines |
| Male | 1994 | 1.3 | 1.1 | 1.5 | Philippines |
| Male | 1995 | 1.6 | 1.4 | 1.7 | Philippines |
| Male | 1996 | 1.2 | 1.0 | 1.3 | Philippines |
| Male | 1997 | 1.2 | 1.1 | 1.4 | Philippines |
| Male | 1998 | 1.3 | 1.2 | 1.5 | Philippines |
| Male | 1999 | 1.3 | 1.1 | 1.5 | Philippines |
| Male | 2000 | 1.1 | 1.0 | 1.3 | Philippines |
| Male | 2001 | 1.4 | 1.2 | 1.5 | Philippines |
| Male | 2002 | 1.3 | 1.1 | 1.4 | Philippines |
| Male | 2003 | 1.4 | 1.3 | 1.6 | Philippines |
| Male | 2006 | 1.2 | 1.0 | 1.3 | Philippines |
| Male | 2007 | 1.3 | 1.2 | 1.5 | Philippines |
| Male | 2008 | 1.2 | 1.1 | 1.4 | Philippines |
| Male | 2009 | 1.1 | 1.0 | 1.2 | Philippines |
| Male | 2010 | 1.2 | 1.0 | 1.3 | Philippines |
| Male | 2011 | 1.1 | 1.0 | 1.2 | Philippines |
| Male | 2014 | 0.9 | 0.8 | 1.0 | Philippines |
| Male | 1980 | 3.9 | 3.6 | 4.2 | Poland      |
| Male | 1981 | 4.0 | 3.7 | 4.3 | Poland      |
| Male | 1982 | 4.5 | 4.2 | 4.8 | Poland      |
| Male | 1983 | 4.7 | 4.4 | 5.1 | Poland      |
| Male | 1984 | 4.6 | 4.3 | 4.9 | Poland      |
| Male | 1985 | 4.8 | 4.5 | 5.1 | Poland      |
| Male | 1986 | 4.8 | 4.5 | 5.1 | Poland      |
| Male | 1987 | 5.0 | 4.7 | 5.3 | Poland      |
| Male | 1988 | 5.1 | 4.8 | 5.4 | Poland      |
| Male | 1989 | 4.7 | 4.4 | 5.0 | Poland      |
| Male | 1990 | 4.7 | 4.4 | 5.0 | Poland      |
| Male | 1991 | 4.9 | 4.6 | 5.2 | Poland      |
| Male | 1992 | 4.6 | 4.3 | 4.9 | Poland      |
| Male | 1993 | 4.7 | 4.4 | 5.0 | Poland      |
| Male | 1994 | 4.8 | 4.6 | 5.1 | Poland      |
| Male | 1995 | 4.6 | 4.4 | 4.9 | Poland      |
| Male | 1996 | 5.0 | 4.7 | 5.3 | Poland      |
| Male | 1999 | 4.4 | 4.1 | 4.7 | Poland      |
| Male | 2000 | 4.7 | 4.4 | 4.9 | Poland      |
| Male | 2001 | 4.5 | 4.3 | 4.8 | Poland      |
| Male | 2002 | 5.1 | 4.8 | 5.4 | Poland      |
| Male | 2003 | 4.6 | 4.3 | 4.9 | Poland      |
| Male | 2004 | 4.8 | 4.5 | 5.1 | Poland      |
| Male | 2005 | 4.4 | 4.1 | 4.6 | Poland      |

|      |      |     |     |     |          |
|------|------|-----|-----|-----|----------|
| Male | 2006 | 4.4 | 4.1 | 4.7 | Poland   |
| Male | 2007 | 4.4 | 4.2 | 4.7 | Poland   |
| Male | 2008 | 4.0 | 3.8 | 4.2 | Poland   |
| Male | 2009 | 3.9 | 3.6 | 4.1 | Poland   |
| Male | 2010 | 3.8 | 3.6 | 4.0 | Poland   |
| Male | 2011 | 3.9 | 3.6 | 4.1 | Poland   |
| Male | 2012 | 4.2 | 3.9 | 4.4 | Poland   |
| Male | 2013 | 3.7 | 3.5 | 3.9 | Poland   |
| Male | 2014 | 3.7 | 3.5 | 3.9 | Poland   |
| Male | 2015 | 3.6 | 3.4 | 3.9 | Poland   |
| Male | 2016 | 3.7 | 3.5 | 3.9 | Poland   |
| Male | 2017 | 3.6 | 3.4 | 3.8 | Poland   |
| Male | 2018 | 3.9 | 3.7 | 4.1 | Poland   |
| Male | 1980 | 5.3 | 4.7 | 5.8 | Portugal |
| Male | 1981 | 5.1 | 4.5 | 5.6 | Portugal |
| Male | 1982 | 5.4 | 4.8 | 6.0 | Portugal |
| Male | 1983 | 5.9 | 5.3 | 6.5 | Portugal |
| Male | 1984 | 5.4 | 4.9 | 6.0 | Portugal |
| Male | 1985 | 5.5 | 5.0 | 6.1 | Portugal |
| Male | 1986 | 5.2 | 4.7 | 5.8 | Portugal |
| Male | 1987 | 5.6 | 5.1 | 6.2 | Portugal |
| Male | 1988 | 5.8 | 5.2 | 6.3 | Portugal |
| Male | 1989 | 5.2 | 4.7 | 5.7 | Portugal |
| Male | 1990 | 5.2 | 4.7 | 5.7 | Portugal |
| Male | 1991 | 5.2 | 4.7 | 5.8 | Portugal |
| Male | 1992 | 4.8 | 4.3 | 5.3 | Portugal |
| Male | 1993 | 5.5 | 5.0 | 6.1 | Portugal |
| Male | 1994 | 4.8 | 4.3 | 5.3 | Portugal |
| Male | 1995 | 4.8 | 4.3 | 5.2 | Portugal |
| Male | 1996 | 4.7 | 4.3 | 5.2 | Portugal |
| Male | 1997 | 5.1 | 4.6 | 5.6 | Portugal |
| Male | 1998 | 4.9 | 4.4 | 5.4 | Portugal |
| Male | 1999 | 4.9 | 4.4 | 5.4 | Portugal |
| Male | 2000 | 5.2 | 4.7 | 5.7 | Portugal |
| Male | 2001 | 5.3 | 4.8 | 5.8 | Portugal |
| Male | 2002 | 5.5 | 5.0 | 6.0 | Portugal |
| Male | 2003 | 5.1 | 4.6 | 5.6 | Portugal |
| Male | 2007 | 5.1 | 4.7 | 5.6 | Portugal |
| Male | 2008 | 5.2 | 4.7 | 5.6 | Portugal |
| Male | 2009 | 5.1 | 4.6 | 5.5 | Portugal |
| Male | 2010 | 4.8 | 4.4 | 5.3 | Portugal |
| Male | 2011 | 5.1 | 4.7 | 5.6 | Portugal |
| Male | 2012 | 5.0 | 4.6 | 5.5 | Portugal |
| Male | 2013 | 5.1 | 4.6 | 5.5 | Portugal |
| Male | 2014 | 5.0 | 4.6 | 5.5 | Portugal |
| Male | 2015 | 4.4 | 4.0 | 4.8 | Portugal |

|      |      |      |     |      |                    |
|------|------|------|-----|------|--------------------|
| Male | 2016 | 4.5  | 4.1 | 4.9  | Portugal           |
| Male | 2017 | 4.6  | 4.2 | 5.0  | Portugal           |
| Male | 2018 | 5.0  | 4.6 | 5.4  | Portugal           |
| Male | 1980 | 7.7  | 7.4 | 7.9  | Russian Federation |
| Male | 1981 | 7.3  | 7.1 | 7.5  | Russian Federation |
| Male | 1982 | 7.3  | 7.1 | 7.6  | Russian Federation |
| Male | 1983 | 7.3  | 7.0 | 7.5  | Russian Federation |
| Male | 1984 | 7.6  | 7.4 | 7.8  | Russian Federation |
| Male | 1985 | 7.6  | 7.4 | 7.8  | Russian Federation |
| Male | 1986 | 7.6  | 7.4 | 7.9  | Russian Federation |
| Male | 1987 | 8.0  | 7.8 | 8.2  | Russian Federation |
| Male | 1988 | 8.1  | 7.9 | 8.3  | Russian Federation |
| Male | 1989 | 8.2  | 8.0 | 8.4  | Russian Federation |
| Male | 1990 | 8.3  | 8.1 | 8.5  | Russian Federation |
| Male | 1991 | 8.5  | 8.3 | 8.7  | Russian Federation |
| Male | 1992 | 8.6  | 8.4 | 8.8  | Russian Federation |
| Male | 1993 | 8.6  | 8.4 | 8.8  | Russian Federation |
| Male | 1994 | 8.3  | 8.1 | 8.5  | Russian Federation |
| Male | 1995 | 7.5  | 7.3 | 7.6  | Russian Federation |
| Male | 1996 | 7.3  | 7.1 | 7.5  | Russian Federation |
| Male | 1997 | 7.2  | 7.0 | 7.4  | Russian Federation |
| Male | 1998 | 7.2  | 7.0 | 7.3  | Russian Federation |
| Male | 1999 | 6.7  | 6.6 | 6.9  | Russian Federation |
| Male | 2000 | 6.6  | 6.4 | 6.8  | Russian Federation |
| Male | 2001 | 6.4  | 6.3 | 6.6  | Russian Federation |
| Male | 2002 | 6.2  | 6.0 | 6.4  | Russian Federation |
| Male | 2003 | 6.4  | 6.2 | 6.5  | Russian Federation |
| Male | 2004 | 6.2  | 6.1 | 6.4  | Russian Federation |
| Male | 2005 | 6.0  | 5.8 | 6.1  | Russian Federation |
| Male | 2006 | 5.7  | 5.6 | 5.9  | Russian Federation |
| Male | 2007 | 5.6  | 5.5 | 5.8  | Russian Federation |
| Male | 2008 | 5.7  | 5.5 | 5.8  | Russian Federation |
| Male | 2009 | 5.8  | 5.7 | 6.0  | Russian Federation |
| Male | 2010 | 5.6  | 5.4 | 5.8  | Russian Federation |
| Male | 2011 | 5.7  | 5.5 | 5.9  | Russian Federation |
| Male | 2012 | 5.4  | 5.3 | 5.5  | Russian Federation |
| Male | 2013 | 5.5  | 5.3 | 5.6  | Russian Federation |
| Male | 2014 | 5.5  | 5.3 | 5.6  | Russian Federation |
| Male | 2015 | 5.6  | 5.5 | 5.8  | Russian Federation |
| Male | 2016 | 5.5  | 5.4 | 5.6  | Russian Federation |
| Male | 2017 | 5.4  | 5.3 | 5.6  | Russian Federation |
| Male | 2018 | 5.3  | 5.2 | 5.5  | Russian Federation |
| Male | 2019 | 5.4  | 5.2 | 5.5  | Russian Federation |
| Male | 1979 | 10.2 | 8.0 | 12.5 | Singapore          |
| Male | 1980 | 10.6 | 8.3 | 12.9 | Singapore          |
| Male | 1981 | 9.6  | 7.5 | 11.7 | Singapore          |



|      |      |      |     |      |           |
|------|------|------|-----|------|-----------|
| Male | 1982 | 8.4  | 6.4 | 10.3 | Singapore |
| Male | 1983 | 10.5 | 8.3 | 12.6 | Singapore |
| Male | 1984 | 8.6  | 6.8 | 10.4 | Singapore |
| Male | 1985 | 6.4  | 4.8 | 7.9  | Singapore |
| Male | 1986 | 6.9  | 5.3 | 8.4  | Singapore |
| Male | 1987 | 6.8  | 5.3 | 8.3  | Singapore |
| Male | 1988 | 6.8  | 5.3 | 8.3  | Singapore |
| Male | 1989 | 7.9  | 6.3 | 9.4  | Singapore |
| Male | 1990 | 6.6  | 5.2 | 8.1  | Singapore |
| Male | 1991 | 5.1  | 3.9 | 6.3  | Singapore |
| Male | 1992 | 4.9  | 3.7 | 6.1  | Singapore |
| Male | 1993 | 5.0  | 3.9 | 6.2  | Singapore |
| Male | 1994 | 4.9  | 3.7 | 6.0  | Singapore |
| Male | 1995 | 4.8  | 3.8 | 5.9  | Singapore |
| Male | 1996 | 4.6  | 3.6 | 5.6  | Singapore |
| Male | 1997 | 3.5  | 2.7 | 4.4  | Singapore |
| Male | 1998 | 4.1  | 3.2 | 5.1  | Singapore |
| Male | 1999 | 3.4  | 2.6 | 4.3  | Singapore |
| Male | 2000 | 4.1  | 3.2 | 5.0  | Singapore |
| Male | 2001 | 4.1  | 3.2 | 5.0  | Singapore |
| Male | 2002 | 2.7  | 2.0 | 3.4  | Singapore |
| Male | 2003 | 3.5  | 2.7 | 4.3  | Singapore |
| Male | 2004 | 3.4  | 2.6 | 4.2  | Singapore |
| Male | 2005 | 2.2  | 1.6 | 2.7  | Singapore |
| Male | 2006 | 2.1  | 1.6 | 2.7  | Singapore |
| Male | 2007 | 2.7  | 2.1 | 3.4  | Singapore |
| Male | 2008 | 2.6  | 2.0 | 3.1  | Singapore |
| Male | 2009 | 2.6  | 2.0 | 3.2  | Singapore |
| Male | 2010 | 2.4  | 1.9 | 2.9  | Singapore |
| Male | 2011 | 1.7  | 1.3 | 2.2  | Singapore |
| Male | 2012 | 1.9  | 1.4 | 2.3  | Singapore |
| Male | 2013 | 2.2  | 1.7 | 2.6  | Singapore |
| Male | 2014 | 1.6  | 1.2 | 2.0  | Singapore |
| Male | 2015 | 2.0  | 1.5 | 2.4  | Singapore |
| Male | 2016 | 1.8  | 1.4 | 2.2  | Singapore |
| Male | 2017 | 1.6  | 1.3 | 2.0  | Singapore |
| Male | 2019 | 1.7  | 1.3 | 2.0  | Singapore |
| Male | 1985 | 6.3  | 4.8 | 7.7  | Slovenia  |
| Male | 1986 | 7.0  | 5.4 | 8.5  | Slovenia  |
| Male | 1987 | 8.0  | 6.3 | 9.7  | Slovenia  |
| Male | 1988 | 7.2  | 5.6 | 8.7  | Slovenia  |
| Male | 1989 | 6.8  | 5.3 | 8.3  | Slovenia  |
| Male | 1990 | 5.1  | 3.9 | 6.4  | Slovenia  |
| Male | 1991 | 7.1  | 5.6 | 8.6  | Slovenia  |
| Male | 1992 | 7.6  | 6.1 | 9.2  | Slovenia  |
| Male | 1993 | 5.0  | 3.8 | 6.2  | Slovenia  |

|      |      |     |     |     |          |
|------|------|-----|-----|-----|----------|
| Male | 1994 | 7.4 | 5.9 | 9.0 | Slovenia |
| Male | 1995 | 6.2 | 4.8 | 7.5 | Slovenia |
| Male | 1996 | 6.6 | 5.2 | 8.0 | Slovenia |
| Male | 1997 | 5.6 | 4.3 | 6.9 | Slovenia |
| Male | 1998 | 4.6 | 3.4 | 5.7 | Slovenia |
| Male | 1999 | 6.9 | 5.5 | 8.2 | Slovenia |
| Male | 2000 | 4.5 | 3.4 | 5.6 | Slovenia |
| Male | 2001 | 4.3 | 3.3 | 5.4 | Slovenia |
| Male | 2002 | 6.0 | 4.7 | 7.2 | Slovenia |
| Male | 2003 | 3.8 | 2.8 | 4.8 | Slovenia |
| Male | 2004 | 5.3 | 4.2 | 6.5 | Slovenia |
| Male | 2005 | 4.7 | 3.6 | 5.7 | Slovenia |
| Male | 2006 | 4.1 | 3.1 | 5.1 | Slovenia |
| Male | 2007 | 4.7 | 3.7 | 5.7 | Slovenia |
| Male | 2008 | 3.2 | 2.4 | 4.0 | Slovenia |
| Male | 2009 | 4.4 | 3.4 | 5.4 | Slovenia |
| Male | 2010 | 3.6 | 2.7 | 4.5 | Slovenia |
| Male | 2011 | 3.8 | 2.9 | 4.6 | Slovenia |
| Male | 2012 | 4.1 | 3.2 | 5.1 | Slovenia |
| Male | 2013 | 2.7 | 2.0 | 3.4 | Slovenia |
| Male | 2014 | 3.8 | 2.9 | 4.6 | Slovenia |
| Male | 2015 | 3.3 | 2.5 | 4.0 | Slovenia |
| Male | 2016 | 3.3 | 2.5 | 4.0 | Slovenia |
| Male | 2017 | 3.6 | 2.7 | 4.4 | Slovenia |
| Male | 2018 | 3.0 | 2.3 | 3.7 | Slovenia |
| Male | 2019 | 2.6 | 2.0 | 3.3 | Slovenia |
| Male | 1980 | 5.1 | 4.8 | 5.4 | Spain    |
| Male | 1981 | 5.0 | 4.7 | 5.3 | Spain    |
| Male | 1982 | 5.4 | 5.2 | 5.7 | Spain    |
| Male | 1983 | 5.2 | 4.9 | 5.5 | Spain    |
| Male | 1984 | 5.3 | 5.0 | 5.5 | Spain    |
| Male | 1985 | 5.1 | 4.8 | 5.4 | Spain    |
| Male | 1986 | 5.3 | 5.0 | 5.6 | Spain    |
| Male | 1987 | 5.4 | 5.2 | 5.7 | Spain    |
| Male | 1988 | 5.2 | 4.9 | 5.5 | Spain    |
| Male | 1989 | 5.4 | 5.1 | 5.6 | Spain    |
| Male | 1990 | 5.5 | 5.2 | 5.7 | Spain    |
| Male | 1991 | 5.3 | 5.0 | 5.6 | Spain    |
| Male | 1992 | 5.6 | 5.4 | 5.9 | Spain    |
| Male | 1993 | 5.3 | 5.0 | 5.6 | Spain    |
| Male | 1994 | 5.4 | 5.1 | 5.6 | Spain    |
| Male | 1995 | 5.4 | 5.2 | 5.7 | Spain    |
| Male | 1996 | 5.3 | 5.1 | 5.6 | Spain    |
| Male | 1997 | 5.1 | 4.8 | 5.3 | Spain    |
| Male | 1998 | 5.2 | 4.9 | 5.4 | Spain    |
| Male | 1999 | 4.8 | 4.6 | 5.0 | Spain    |

|      |      |     |     |     |             |
|------|------|-----|-----|-----|-------------|
| Male | 2000 | 4.8 | 4.5 | 5.0 | Spain       |
| Male | 2001 | 4.6 | 4.4 | 4.8 | Spain       |
| Male | 2002 | 4.5 | 4.3 | 4.8 | Spain       |
| Male | 2003 | 4.6 | 4.3 | 4.8 | Spain       |
| Male | 2004 | 4.5 | 4.3 | 4.7 | Spain       |
| Male | 2005 | 4.1 | 3.9 | 4.3 | Spain       |
| Male | 2006 | 3.9 | 3.7 | 4.1 | Spain       |
| Male | 2007 | 3.9 | 3.7 | 4.1 | Spain       |
| Male | 2008 | 3.9 | 3.7 | 4.1 | Spain       |
| Male | 2009 | 3.7 | 3.5 | 3.8 | Spain       |
| Male | 2010 | 3.6 | 3.4 | 3.8 | Spain       |
| Male | 2011 | 3.7 | 3.5 | 3.8 | Spain       |
| Male | 2012 | 3.4 | 3.2 | 3.6 | Spain       |
| Male | 2013 | 3.4 | 3.2 | 3.6 | Spain       |
| Male | 2014 | 3.4 | 3.2 | 3.5 | Spain       |
| Male | 2015 | 3.5 | 3.3 | 3.6 | Spain       |
| Male | 2016 | 3.2 | 3.1 | 3.4 | Spain       |
| Male | 2017 | 3.1 | 3.0 | 3.3 | Spain       |
| Male | 1995 | 4.7 | 4.1 | 5.2 | Switzerland |
| Male | 1996 | 4.5 | 4.0 | 5.1 | Switzerland |
| Male | 1997 | 4.6 | 4.0 | 5.1 | Switzerland |
| Male | 1998 | 4.8 | 4.2 | 5.4 | Switzerland |
| Male | 1999 | 4.3 | 3.8 | 4.9 | Switzerland |
| Male | 2000 | 4.8 | 4.2 | 5.3 | Switzerland |
| Male | 2001 | 4.8 | 4.2 | 5.3 | Switzerland |
| Male | 2002 | 4.8 | 4.3 | 5.4 | Switzerland |
| Male | 2003 | 4.8 | 4.3 | 5.3 | Switzerland |
| Male | 2004 | 4.1 | 3.6 | 4.6 | Switzerland |
| Male | 2005 | 4.6 | 4.1 | 5.1 | Switzerland |
| Male | 2006 | 4.3 | 3.9 | 4.8 | Switzerland |
| Male | 2007 | 4.6 | 4.1 | 5.1 | Switzerland |
| Male | 2008 | 4.2 | 3.7 | 4.6 | Switzerland |
| Male | 2009 | 4.0 | 3.6 | 4.5 | Switzerland |
| Male | 2010 | 4.2 | 3.7 | 4.6 | Switzerland |
| Male | 2011 | 4.2 | 3.7 | 4.6 | Switzerland |
| Male | 2012 | 3.9 | 3.5 | 4.4 | Switzerland |
| Male | 2013 | 4.1 | 3.7 | 4.6 | Switzerland |
| Male | 2014 | 3.9 | 3.5 | 4.3 | Switzerland |
| Male | 2015 | 3.7 | 3.3 | 4.1 | Switzerland |
| Male | 2016 | 3.8 | 3.4 | 4.2 | Switzerland |
| Male | 2017 | 3.0 | 2.6 | 3.3 | Switzerland |
| Male | 1979 | 0.9 | 0.7 | 1.1 | Thailand    |
| Male | 1980 | 1.1 | 0.9 | 1.3 | Thailand    |
| Male | 1981 | 1.2 | 1.0 | 1.4 | Thailand    |
| Male | 1982 | 1.2 | 1.1 | 1.4 | Thailand    |
| Male | 1983 | 1.2 | 1.0 | 1.3 | Thailand    |

|      |      |     |     |     |                |
|------|------|-----|-----|-----|----------------|
| Male | 1984 | 0.8 | 0.6 | 0.9 | Thailand       |
| Male | 1985 | 0.6 | 0.4 | 0.7 | Thailand       |
| Male | 1986 | 0.6 | 0.5 | 0.7 | Thailand       |
| Male | 1987 | 0.7 | 0.6 | 0.8 | Thailand       |
| Male | 1990 | 0.8 | 0.7 | 0.9 | Thailand       |
| Male | 1991 | 0.8 | 0.7 | 1.0 | Thailand       |
| Male | 1992 | 0.7 | 0.6 | 0.9 | Thailand       |
| Male | 1994 | 0.9 | 0.7 | 1.0 | Thailand       |
| Male | 1995 | 0.7 | 0.6 | 0.8 | Thailand       |
| Male | 1996 | 0.6 | 0.5 | 0.7 | Thailand       |
| Male | 1997 | 0.6 | 0.5 | 0.7 | Thailand       |
| Male | 1998 | 0.5 | 0.4 | 0.6 | Thailand       |
| Male | 1999 | 0.8 | 0.7 | 0.9 | Thailand       |
| Male | 2000 | 1.1 | 1.0 | 1.3 | Thailand       |
| Male | 2002 | 1.9 | 1.7 | 2.0 | Thailand       |
| Male | 2003 | 2.5 | 2.4 | 2.7 | Thailand       |
| Male | 2004 | 1.9 | 1.8 | 2.1 | Thailand       |
| Male | 2005 | 1.9 | 1.7 | 2.0 | Thailand       |
| Male | 2006 | 1.9 | 1.8 | 2.1 | Thailand       |
| Male | 2007 | 2.0 | 1.8 | 2.1 | Thailand       |
| Male | 2008 | 2.0 | 1.9 | 2.2 | Thailand       |
| Male | 2009 | 2.1 | 2.0 | 2.3 | Thailand       |
| Male | 2010 | 2.2 | 2.0 | 2.3 | Thailand       |
| Male | 2011 | 2.5 | 2.4 | 2.7 | Thailand       |
| Male | 2012 | 2.6 | 2.4 | 2.7 | Thailand       |
| Male | 2013 | 2.7 | 2.6 | 2.9 | Thailand       |
| Male | 2014 | 2.8 | 2.7 | 3.0 | Thailand       |
| Male | 2015 | 2.9 | 2.8 | 3.1 | Thailand       |
| Male | 2016 | 3.1 | 2.9 | 3.2 | Thailand       |
| Male | 2017 | 3.1 | 2.9 | 3.3 | Thailand       |
| Male | 2018 | 3.3 | 3.1 | 3.5 | Thailand       |
| Male | 2019 | 3.2 | 3.1 | 3.4 | Thailand       |
| Male | 2009 | 1.0 | 0.9 | 1.1 | Turkey         |
| Male | 2010 | 1.1 | 1.0 | 1.2 | Turkey         |
| Male | 2011 | 1.1 | 1.0 | 1.3 | Turkey         |
| Male | 2012 | 1.1 | 1.0 | 1.2 | Turkey         |
| Male | 2013 | 1.3 | 1.2 | 1.4 | Turkey         |
| Male | 2014 | 1.2 | 1.1 | 1.4 | Turkey         |
| Male | 2015 | 1.1 | 1.0 | 1.2 | Turkey         |
| Male | 2016 | 1.1 | 1.0 | 1.2 | Turkey         |
| Male | 2019 | 0.9 | 0.8 | 1.0 | Turkey         |
| Male | 1979 | 5.4 | 5.2 | 5.6 | United Kingdom |
| Male | 1980 | 5.7 | 5.4 | 5.9 | United Kingdom |
| Male | 1981 | 5.7 | 5.5 | 6.0 | United Kingdom |
| Male | 1982 | 6.0 | 5.7 | 6.2 | United Kingdom |
| Male | 1983 | 6.0 | 5.7 | 6.2 | United Kingdom |

|        |      |     |     |     |                |
|--------|------|-----|-----|-----|----------------|
| Male   | 1984 | 6.1 | 5.9 | 6.4 | United Kingdom |
| Male   | 1985 | 6.7 | 6.4 | 6.9 | United Kingdom |
| Male   | 1986 | 6.5 | 6.2 | 6.7 | United Kingdom |
| Male   | 1987 | 6.8 | 6.6 | 7.1 | United Kingdom |
| Male   | 1988 | 7.1 | 6.8 | 7.3 | United Kingdom |
| Male   | 1989 | 7.1 | 6.9 | 7.4 | United Kingdom |
| Male   | 1990 | 7.4 | 7.2 | 7.7 | United Kingdom |
| Male   | 1991 | 7.4 | 7.2 | 7.6 | United Kingdom |
| Male   | 1992 | 7.6 | 7.4 | 7.9 | United Kingdom |
| Male   | 1993 | 7.8 | 7.5 | 8.0 | United Kingdom |
| Male   | 1994 | 8.0 | 7.8 | 8.3 | United Kingdom |
| Male   | 1995 | 7.9 | 7.7 | 8.2 | United Kingdom |
| Male   | 1996 | 7.9 | 7.7 | 8.1 | United Kingdom |
| Male   | 1997 | 7.8 | 7.6 | 8.1 | United Kingdom |
| Male   | 1998 | 8.1 | 7.8 | 8.3 | United Kingdom |
| Male   | 1999 | 8.0 | 7.7 | 8.2 | United Kingdom |
| Male   | 2001 | 8.0 | 7.8 | 8.2 | United Kingdom |
| Male   | 2002 | 8.1 | 7.9 | 8.4 | United Kingdom |
| Male   | 2003 | 8.3 | 8.1 | 8.6 | United Kingdom |
| Male   | 2004 | 8.0 | 7.7 | 8.2 | United Kingdom |
| Male   | 2005 | 8.1 | 7.9 | 8.3 | United Kingdom |
| Male   | 2006 | 8.0 | 7.8 | 8.2 | United Kingdom |
| Male   | 2007 | 7.8 | 7.6 | 8.0 | United Kingdom |
| Male   | 2008 | 8.0 | 7.8 | 8.2 | United Kingdom |
| Male   | 2009 | 7.8 | 7.6 | 8.0 | United Kingdom |
| Male   | 2010 | 7.6 | 7.4 | 7.8 | United Kingdom |
| Male   | 2011 | 7.6 | 7.4 | 7.8 | United Kingdom |
| Male   | 2012 | 7.5 | 7.3 | 7.7 | United Kingdom |
| Male   | 2013 | 7.4 | 7.2 | 7.6 | United Kingdom |
| Male   | 2014 | 7.1 | 6.9 | 7.3 | United Kingdom |
| Male   | 2015 | 7.4 | 7.2 | 7.6 | United Kingdom |
| Male   | 2016 | 7.2 | 7.1 | 7.4 | United Kingdom |
| Female | 1979 | 1.5 | 1.2 | 1.7 | Australia      |
| Female | 1980 | 1.4 | 1.2 | 1.6 | Australia      |
| Female | 1981 | 1.4 | 1.2 | 1.6 | Australia      |
| Female | 1982 | 1.5 | 1.3 | 1.7 | Australia      |
| Female | 1983 | 1.5 | 1.3 | 1.7 | Australia      |
| Female | 1984 | 1.4 | 1.2 | 1.6 | Australia      |
| Female | 1985 | 1.8 | 1.5 | 2.0 | Australia      |
| Female | 1986 | 1.4 | 1.2 | 1.6 | Australia      |
| Female | 1987 | 1.7 | 1.5 | 1.9 | Australia      |
| Female | 1988 | 1.7 | 1.5 | 1.9 | Australia      |
| Female | 1989 | 1.6 | 1.5 | 1.8 | Australia      |
| Female | 1990 | 1.4 | 1.2 | 1.5 | Australia      |
| Female | 1991 | 1.6 | 1.4 | 1.8 | Australia      |
| Female | 1992 | 1.4 | 1.2 | 1.6 | Australia      |

|        |      |     |     |     |           |
|--------|------|-----|-----|-----|-----------|
| Female | 1993 | 1.5 | 1.3 | 1.7 | Australia |
| Female | 1994 | 1.5 | 1.3 | 1.7 | Australia |
| Female | 1995 | 1.5 | 1.3 | 1.6 | Australia |
| Female | 1996 | 1.6 | 1.5 | 1.8 | Australia |
| Female | 1997 | 1.3 | 1.2 | 1.5 | Australia |
| Female | 1998 | 1.5 | 1.3 | 1.6 | Australia |
| Female | 1999 | 1.3 | 1.2 | 1.5 | Australia |
| Female | 2000 | 1.1 | 1.0 | 1.3 | Australia |
| Female | 2001 | 1.4 | 1.3 | 1.6 | Australia |
| Female | 2002 | 1.3 | 1.2 | 1.5 | Australia |
| Female | 2003 | 1.4 | 1.3 | 1.6 | Australia |
| Female | 2004 | 1.3 | 1.1 | 1.4 | Australia |
| Female | 2006 | 1.2 | 1.1 | 1.3 | Australia |
| Female | 2007 | 1.1 | 1.0 | 1.2 | Australia |
| Female | 2008 | 1.2 | 1.1 | 1.3 | Australia |
| Female | 2009 | 1.2 | 1.1 | 1.3 | Australia |
| Female | 2010 | 1.1 | 1.0 | 1.3 | Australia |
| Female | 2011 | 1.1 | 1.0 | 1.2 | Australia |
| Female | 2012 | 1.0 | 0.9 | 1.1 | Australia |
| Female | 2013 | 1.0 | 0.9 | 1.1 | Australia |
| Female | 2014 | 0.9 | 0.8 | 1.0 | Australia |
| Female | 2015 | 1.1 | 1.0 | 1.2 | Australia |
| Female | 2016 | 1.0 | 0.9 | 1.1 | Australia |
| Female | 2017 | 1.0 | 0.9 | 1.1 | Australia |
| Female | 2018 | 0.9 | 0.8 | 0.9 | Australia |
| Female | 1980 | 0.4 | 0.3 | 0.5 | Austria   |
| Female | 1981 | 0.4 | 0.3 | 0.6 | Austria   |
| Female | 1982 | 0.4 | 0.2 | 0.5 | Austria   |
| Female | 1983 | 0.5 | 0.3 | 0.6 | Austria   |
| Female | 1984 | 0.5 | 0.3 | 0.6 | Austria   |
| Female | 1985 | 0.3 | 0.2 | 0.5 | Austria   |
| Female | 1986 | 0.5 | 0.4 | 0.6 | Austria   |
| Female | 1987 | 0.3 | 0.2 | 0.4 | Austria   |
| Female | 1988 | 0.3 | 0.2 | 0.5 | Austria   |
| Female | 1989 | 0.4 | 0.3 | 0.5 | Austria   |
| Female | 1990 | 0.4 | 0.3 | 0.5 | Austria   |
| Female | 1991 | 0.4 | 0.3 | 0.5 | Austria   |
| Female | 1992 | 0.5 | 0.3 | 0.6 | Austria   |
| Female | 1993 | 0.4 | 0.3 | 0.5 | Austria   |
| Female | 1994 | 0.4 | 0.3 | 0.5 | Austria   |
| Female | 1995 | 0.4 | 0.3 | 0.6 | Austria   |
| Female | 1996 | 0.6 | 0.5 | 0.8 | Austria   |
| Female | 1997 | 0.5 | 0.4 | 0.7 | Austria   |
| Female | 1998 | 0.6 | 0.4 | 0.7 | Austria   |
| Female | 1999 | 0.7 | 0.5 | 0.9 | Austria   |
| Female | 2000 | 0.6 | 0.5 | 0.8 | Austria   |

|        |      |     |     |     |         |
|--------|------|-----|-----|-----|---------|
| Female | 2001 | 0.6 | 0.5 | 0.8 | Austria |
| Female | 2002 | 0.6 | 0.4 | 0.7 | Austria |
| Female | 2003 | 0.6 | 0.4 | 0.7 | Austria |
| Female | 2004 | 0.5 | 0.4 | 0.7 | Austria |
| Female | 2005 | 0.5 | 0.4 | 0.7 | Austria |
| Female | 2006 | 0.7 | 0.5 | 0.8 | Austria |
| Female | 2007 | 0.5 | 0.4 | 0.6 | Austria |
| Female | 2008 | 0.6 | 0.4 | 0.7 | Austria |
| Female | 2009 | 0.6 | 0.4 | 0.7 | Austria |
| Female | 2010 | 0.5 | 0.4 | 0.6 | Austria |
| Female | 2011 | 0.5 | 0.4 | 0.6 | Austria |
| Female | 2012 | 0.7 | 0.6 | 0.9 | Austria |
| Female | 2013 | 0.7 | 0.5 | 0.8 | Austria |
| Female | 2014 | 0.7 | 0.5 | 0.9 | Austria |
| Female | 2015 | 0.6 | 0.5 | 0.8 | Austria |
| Female | 2016 | 0.9 | 0.7 | 1.1 | Austria |
| Female | 2017 | 0.6 | 0.4 | 0.7 | Austria |
| Female | 2018 | 0.6 | 0.5 | 0.7 | Austria |
| Female | 2019 | 0.6 | 0.4 | 0.7 | Austria |
| Female | 1981 | 0.4 | 0.3 | 0.5 | Belarus |
| Female | 1982 | 0.5 | 0.4 | 0.7 | Belarus |
| Female | 1985 | 0.4 | 0.3 | 0.5 | Belarus |
| Female | 1986 | 0.5 | 0.4 | 0.7 | Belarus |
| Female | 1987 | 0.4 | 0.3 | 0.6 | Belarus |
| Female | 1988 | 0.5 | 0.4 | 0.7 | Belarus |
| Female | 1989 | 0.5 | 0.3 | 0.6 | Belarus |
| Female | 1990 | 0.3 | 0.2 | 0.4 | Belarus |
| Female | 1991 | 0.7 | 0.6 | 0.9 | Belarus |
| Female | 1992 | 0.5 | 0.3 | 0.6 | Belarus |
| Female | 1993 | 0.5 | 0.4 | 0.7 | Belarus |
| Female | 1994 | 0.4 | 0.3 | 0.5 | Belarus |
| Female | 1995 | 0.5 | 0.4 | 0.6 | Belarus |
| Female | 1997 | 0.3 | 0.2 | 0.4 | Belarus |
| Female | 1998 | 0.4 | 0.3 | 0.6 | Belarus |
| Female | 1999 | 0.3 | 0.2 | 0.4 | Belarus |
| Female | 2000 | 0.4 | 0.3 | 0.5 | Belarus |
| Female | 2001 | 0.4 | 0.3 | 0.5 | Belarus |
| Female | 2002 | 0.3 | 0.2 | 0.4 | Belarus |
| Female | 2003 | 0.3 | 0.2 | 0.4 | Belarus |
| Female | 2007 | 0.4 | 0.2 | 0.5 | Belarus |
| Female | 2008 | 0.2 | 0.1 | 0.3 | Belarus |
| Female | 2009 | 0.3 | 0.2 | 0.4 | Belarus |
| Female | 2010 | 0.3 | 0.2 | 0.4 | Belarus |
| Female | 2011 | 0.3 | 0.2 | 0.4 | Belarus |
| Female | 2013 | 0.5 | 0.3 | 0.6 | Belarus |
| Female | 2014 | 0.4 | 0.3 | 0.5 | Belarus |

|        |      |     |     |     |         |
|--------|------|-----|-----|-----|---------|
| Female | 2018 | 0.4 | 0.3 | 0.5 | Belarus |
| Female | 1979 | 0.9 | 0.8 | 1.1 | Belgium |
| Female | 1980 | 1.1 | 0.9 | 1.2 | Belgium |
| Female | 1981 | 0.7 | 0.5 | 0.8 | Belgium |
| Female | 1982 | 0.9 | 0.8 | 1.1 | Belgium |
| Female | 1983 | 0.8 | 0.7 | 1.0 | Belgium |
| Female | 1984 | 0.9 | 0.7 | 1.0 | Belgium |
| Female | 1985 | 0.9 | 0.7 | 1.1 | Belgium |
| Female | 1986 | 0.9 | 0.8 | 1.1 | Belgium |
| Female | 1987 | 1.1 | 1.0 | 1.3 | Belgium |
| Female | 1988 | 0.9 | 0.8 | 1.1 | Belgium |
| Female | 1989 | 1.0 | 0.8 | 1.1 | Belgium |
| Female | 1990 | 0.8 | 0.7 | 1.0 | Belgium |
| Female | 1991 | 1.0 | 0.8 | 1.2 | Belgium |
| Female | 1992 | 1.1 | 0.9 | 1.3 | Belgium |
| Female | 1993 | 0.9 | 0.8 | 1.1 | Belgium |
| Female | 1994 | 0.9 | 0.7 | 1.0 | Belgium |
| Female | 1995 | 1.0 | 0.8 | 1.2 | Belgium |
| Female | 1996 | 1.3 | 1.1 | 1.5 | Belgium |
| Female | 1997 | 0.9 | 0.8 | 1.1 | Belgium |
| Female | 1998 | 1.2 | 1.0 | 1.4 | Belgium |
| Female | 1999 | 1.1 | 0.9 | 1.3 | Belgium |
| Female | 2000 | 1.2 | 1.0 | 1.4 | Belgium |
| Female | 2001 | 1.1 | 0.9 | 1.3 | Belgium |
| Female | 2002 | 1.2 | 1.0 | 1.4 | Belgium |
| Female | 2003 | 1.4 | 1.2 | 1.6 | Belgium |
| Female | 2004 | 1.3 | 1.1 | 1.5 | Belgium |
| Female | 2005 | 1.2 | 1.0 | 1.4 | Belgium |
| Female | 2006 | 1.2 | 1.0 | 1.4 | Belgium |
| Female | 2007 | 1.2 | 1.0 | 1.4 | Belgium |
| Female | 2008 | 1.1 | 0.9 | 1.2 | Belgium |
| Female | 2009 | 1.3 | 1.1 | 1.5 | Belgium |
| Female | 2010 | 1.2 | 1.0 | 1.4 | Belgium |
| Female | 2011 | 1.3 | 1.1 | 1.5 | Belgium |
| Female | 2012 | 1.2 | 1.1 | 1.4 | Belgium |
| Female | 2013 | 1.1 | 0.9 | 1.2 | Belgium |
| Female | 2014 | 1.3 | 1.1 | 1.5 | Belgium |
| Female | 2015 | 1.3 | 1.1 | 1.5 | Belgium |
| Female | 2016 | 1.2 | 1.0 | 1.3 | Belgium |
| Female | 1979 | 1.8 | 1.6 | 1.9 | Brazil  |
| Female | 1980 | 1.8 | 1.6 | 1.9 | Brazil  |
| Female | 1981 | 1.8 | 1.7 | 1.9 | Brazil  |
| Female | 1982 | 1.7 | 1.6 | 1.9 | Brazil  |
| Female | 1983 | 1.8 | 1.6 | 1.9 | Brazil  |
| Female | 1984 | 1.6 | 1.5 | 1.7 | Brazil  |
| Female | 1985 | 1.7 | 1.5 | 1.8 | Brazil  |



|        |      |     |     |     |          |
|--------|------|-----|-----|-----|----------|
| Female | 1986 | 1.8 | 1.7 | 1.9 | Brazil   |
| Female | 1987 | 1.7 | 1.6 | 1.8 | Brazil   |
| Female | 1988 | 1.8 | 1.7 | 1.9 | Brazil   |
| Female | 1989 | 1.7 | 1.6 | 1.8 | Brazil   |
| Female | 1990 | 1.6 | 1.5 | 1.7 | Brazil   |
| Female | 1991 | 1.6 | 1.5 | 1.7 | Brazil   |
| Female | 1992 | 1.4 | 1.4 | 1.5 | Brazil   |
| Female | 1993 | 1.5 | 1.4 | 1.6 | Brazil   |
| Female | 1994 | 1.6 | 1.5 | 1.7 | Brazil   |
| Female | 1995 | 1.6 | 1.5 | 1.7 | Brazil   |
| Female | 1996 | 1.6 | 1.5 | 1.7 | Brazil   |
| Female | 1997 | 1.5 | 1.4 | 1.6 | Brazil   |
| Female | 1998 | 1.4 | 1.3 | 1.5 | Brazil   |
| Female | 1999 | 1.5 | 1.4 | 1.5 | Brazil   |
| Female | 2000 | 1.4 | 1.3 | 1.5 | Brazil   |
| Female | 2001 | 1.5 | 1.4 | 1.5 | Brazil   |
| Female | 2002 | 1.5 | 1.4 | 1.5 | Brazil   |
| Female | 2003 | 1.5 | 1.4 | 1.6 | Brazil   |
| Female | 2004 | 1.5 | 1.4 | 1.5 | Brazil   |
| Female | 2005 | 1.4 | 1.3 | 1.5 | Brazil   |
| Female | 2006 | 1.5 | 1.4 | 1.5 | Brazil   |
| Female | 2007 | 1.5 | 1.4 | 1.6 | Brazil   |
| Female | 2008 | 1.4 | 1.4 | 1.5 | Brazil   |
| Female | 2009 | 1.5 | 1.4 | 1.5 | Brazil   |
| Female | 2010 | 1.4 | 1.3 | 1.5 | Brazil   |
| Female | 2011 | 1.3 | 1.3 | 1.4 | Brazil   |
| Female | 2012 | 1.3 | 1.3 | 1.4 | Brazil   |
| Female | 2013 | 1.3 | 1.2 | 1.3 | Brazil   |
| Female | 2014 | 1.3 | 1.2 | 1.3 | Brazil   |
| Female | 2015 | 1.2 | 1.2 | 1.3 | Brazil   |
| Female | 2016 | 1.2 | 1.2 | 1.3 | Brazil   |
| Female | 2017 | 1.2 | 1.2 | 1.3 | Brazil   |
| Female | 2018 | 1.2 | 1.1 | 1.2 | Brazil   |
| Female | 2019 | 1.1 | 1.1 | 1.2 | Brazil   |
| Female | 1980 | 0.2 | 0.1 | 0.3 | Bulgaria |
| Female | 1981 | 0.4 | 0.3 | 0.6 | Bulgaria |
| Female | 1982 | 0.3 | 0.2 | 0.5 | Bulgaria |
| Female | 1983 | 0.3 | 0.2 | 0.5 | Bulgaria |
| Female | 1984 | 0.4 | 0.2 | 0.5 | Bulgaria |
| Female | 1985 | 0.5 | 0.3 | 0.6 | Bulgaria |
| Female | 1986 | 0.3 | 0.1 | 0.4 | Bulgaria |
| Female | 1987 | 0.5 | 0.4 | 0.7 | Bulgaria |
| Female | 1988 | 0.4 | 0.3 | 0.6 | Bulgaria |
| Female | 1989 | 1.1 | 0.9 | 1.3 | Bulgaria |
| Female | 1990 | 0.9 | 0.7 | 1.1 | Bulgaria |
| Female | 1991 | 1.9 | 1.6 | 2.2 | Bulgaria |

|        |      |     |     |     |          |
|--------|------|-----|-----|-----|----------|
| Female | 1992 | 1.0 | 0.7 | 1.2 | Bulgaria |
| Female | 1993 | 1.3 | 1.1 | 1.6 | Bulgaria |
| Female | 1994 | 0.7 | 0.5 | 0.9 | Bulgaria |
| Female | 1995 | 0.9 | 0.7 | 1.1 | Bulgaria |
| Female | 1996 | 0.8 | 0.6 | 1.0 | Bulgaria |
| Female | 1997 | 0.9 | 0.7 | 1.2 | Bulgaria |
| Female | 1998 | 0.6 | 0.4 | 0.8 | Bulgaria |
| Female | 1999 | 0.5 | 0.4 | 0.6 | Bulgaria |
| Female | 2000 | 0.4 | 0.3 | 0.6 | Bulgaria |
| Female | 2001 | 0.4 | 0.3 | 0.6 | Bulgaria |
| Female | 2002 | 0.5 | 0.4 | 0.7 | Bulgaria |
| Female | 2003 | 0.3 | 0.2 | 0.4 | Bulgaria |
| Female | 2004 | 0.6 | 0.4 | 0.7 | Bulgaria |
| Female | 2005 | 0.3 | 0.2 | 0.5 | Bulgaria |
| Female | 2006 | 0.4 | 0.2 | 0.5 | Bulgaria |
| Female | 2007 | 0.4 | 0.2 | 0.5 | Bulgaria |
| Female | 2008 | 0.3 | 0.2 | 0.4 | Bulgaria |
| Female | 2009 | 0.5 | 0.3 | 0.6 | Bulgaria |
| Female | 2010 | 0.4 | 0.3 | 0.6 | Bulgaria |
| Female | 2011 | 0.4 | 0.2 | 0.5 | Bulgaria |
| Female | 2012 | 0.3 | 0.2 | 0.4 | Bulgaria |
| Female | 2013 | 0.5 | 0.3 | 0.6 | Bulgaria |
| Female | 2014 | 0.3 | 0.2 | 0.5 | Bulgaria |
| Female | 2015 | 0.5 | 0.4 | 0.7 | Bulgaria |
| Female | 2016 | 0.4 | 0.2 | 0.5 | Bulgaria |
| Female | 2017 | 0.3 | 0.2 | 0.4 | Bulgaria |
| Female | 2018 | 0.5 | 0.3 | 0.6 | Bulgaria |
| Female | 1979 | 1.0 | 0.9 | 1.2 | Canada   |
| Female | 1980 | 1.1 | 0.9 | 1.2 | Canada   |
| Female | 1981 | 0.9 | 0.8 | 1.0 | Canada   |
| Female | 1982 | 0.9 | 0.8 | 1.1 | Canada   |
| Female | 1983 | 1.0 | 0.8 | 1.1 | Canada   |
| Female | 1984 | 1.0 | 0.9 | 1.2 | Canada   |
| Female | 1985 | 1.0 | 0.8 | 1.1 | Canada   |
| Female | 1986 | 1.1 | 1.0 | 1.3 | Canada   |
| Female | 1987 | 0.9 | 0.8 | 1.1 | Canada   |
| Female | 1988 | 1.0 | 0.9 | 1.1 | Canada   |
| Female | 1989 | 1.0 | 0.9 | 1.1 | Canada   |
| Female | 1990 | 1.1 | 1.0 | 1.2 | Canada   |
| Female | 1991 | 1.0 | 0.9 | 1.2 | Canada   |
| Female | 1992 | 1.1 | 0.9 | 1.2 | Canada   |
| Female | 1993 | 1.1 | 1.0 | 1.3 | Canada   |
| Female | 1994 | 1.0 | 0.9 | 1.1 | Canada   |
| Female | 1995 | 1.0 | 0.9 | 1.1 | Canada   |
| Female | 1996 | 1.0 | 0.9 | 1.2 | Canada   |
| Female | 1997 | 1.0 | 0.9 | 1.1 | Canada   |

|        |      |     |     |     |        |
|--------|------|-----|-----|-----|--------|
| Female | 1998 | 1.0 | 0.9 | 1.1 | Canada |
| Female | 1999 | 1.1 | 1.0 | 1.2 | Canada |
| Female | 2000 | 1.0 | 0.9 | 1.1 | Canada |
| Female | 2001 | 0.9 | 0.8 | 1.0 | Canada |
| Female | 2002 | 1.1 | 1.0 | 1.2 | Canada |
| Female | 2003 | 1.0 | 0.9 | 1.1 | Canada |
| Female | 2004 | 0.9 | 0.9 | 1.0 | Canada |
| Female | 2005 | 0.9 | 0.8 | 0.9 | Canada |
| Female | 2006 | 0.9 | 0.8 | 1.0 | Canada |
| Female | 2007 | 0.9 | 0.8 | 1.0 | Canada |
| Female | 2008 | 0.9 | 0.8 | 0.9 | Canada |
| Female | 2009 | 1.0 | 0.9 | 1.1 | Canada |
| Female | 2010 | 1.0 | 0.9 | 1.1 | Canada |
| Female | 2011 | 0.9 | 0.8 | 0.9 | Canada |
| Female | 2012 | 0.9 | 0.8 | 1.0 | Canada |
| Female | 2013 | 1.0 | 0.9 | 1.1 | Canada |
| Female | 2014 | 1.0 | 0.9 | 1.1 | Canada |
| Female | 2015 | 0.9 | 0.9 | 1.0 | Canada |
| Female | 2016 | 0.9 | 0.8 | 1.0 | Canada |
| Female | 2017 | 0.9 | 0.8 | 1.0 | Canada |
| Female | 2018 | 1.0 | 0.9 | 1.1 | Canada |
| Female | 2019 | 0.9 | 0.8 | 1.0 | Canada |
| Female | 1980 | 3.7 | 3.2 | 4.2 | Chile  |
| Female | 1981 | 3.4 | 2.9 | 3.9 | Chile  |
| Female | 1982 | 3.7 | 3.2 | 4.2 | Chile  |
| Female | 1983 | 3.6 | 3.1 | 4.1 | Chile  |
| Female | 1984 | 3.6 | 3.1 | 4.0 | Chile  |
| Female | 1985 | 3.4 | 3.0 | 3.9 | Chile  |
| Female | 1986 | 3.2 | 2.8 | 3.6 | Chile  |
| Female | 1987 | 3.0 | 2.6 | 3.4 | Chile  |
| Female | 1988 | 2.9 | 2.5 | 3.3 | Chile  |
| Female | 1989 | 3.1 | 2.7 | 3.6 | Chile  |
| Female | 1990 | 3.0 | 2.6 | 3.3 | Chile  |
| Female | 1991 | 2.7 | 2.3 | 3.1 | Chile  |
| Female | 1992 | 2.7 | 2.4 | 3.1 | Chile  |
| Female | 1993 | 2.6 | 2.3 | 2.9 | Chile  |
| Female | 1994 | 2.7 | 2.3 | 3.0 | Chile  |
| Female | 1995 | 2.4 | 2.1 | 2.7 | Chile  |
| Female | 1996 | 2.9 | 2.5 | 3.2 | Chile  |
| Female | 1997 | 2.4 | 2.1 | 2.7 | Chile  |
| Female | 1998 | 2.1 | 1.8 | 2.3 | Chile  |
| Female | 1999 | 2.6 | 2.3 | 2.9 | Chile  |
| Female | 2000 | 2.2 | 1.9 | 2.5 | Chile  |
| Female | 2001 | 2.1 | 1.8 | 2.3 | Chile  |
| Female | 2002 | 2.0 | 1.8 | 2.3 | Chile  |
| Female | 2003 | 2.1 | 1.8 | 2.3 | Chile  |

|        |      |     |     |     |          |
|--------|------|-----|-----|-----|----------|
| Female | 2004 | 1.9 | 1.7 | 2.1 | Chile    |
| Female | 2005 | 2.0 | 1.8 | 2.2 | Chile    |
| Female | 2006 | 1.4 | 1.2 | 1.6 | Chile    |
| Female | 2007 | 1.6 | 1.4 | 1.8 | Chile    |
| Female | 2008 | 1.4 | 1.2 | 1.6 | Chile    |
| Female | 2009 | 1.5 | 1.3 | 1.7 | Chile    |
| Female | 2010 | 1.3 | 1.2 | 1.5 | Chile    |
| Female | 2011 | 1.3 | 1.2 | 1.5 | Chile    |
| Female | 2012 | 1.1 | 1.0 | 1.2 | Chile    |
| Female | 2013 | 1.2 | 1.1 | 1.4 | Chile    |
| Female | 2014 | 1.3 | 1.2 | 1.5 | Chile    |
| Female | 2015 | 1.2 | 1.1 | 1.3 | Chile    |
| Female | 2016 | 1.0 | 0.8 | 1.1 | Chile    |
| Female | 2017 | 0.9 | 0.8 | 1.0 | Chile    |
| Female | 2018 | 0.9 | 0.8 | 1.0 | Chile    |
| Female | 1984 | 2.0 | 1.7 | 2.2 | Colombia |
| Female | 1985 | 2.1 | 1.8 | 2.4 | Colombia |
| Female | 1986 | 1.9 | 1.7 | 2.2 | Colombia |
| Female | 1987 | 2.0 | 1.8 | 2.3 | Colombia |
| Female | 1988 | 1.5 | 1.2 | 1.7 | Colombia |
| Female | 1989 | 1.7 | 1.5 | 2.0 | Colombia |
| Female | 1990 | 1.6 | 1.4 | 1.9 | Colombia |
| Female | 1991 | 1.7 | 1.5 | 1.9 | Colombia |
| Female | 1992 | 1.5 | 1.3 | 1.7 | Colombia |
| Female | 1993 | 1.6 | 1.4 | 1.8 | Colombia |
| Female | 1994 | 1.5 | 1.3 | 1.7 | Colombia |
| Female | 1995 | 1.2 | 1.1 | 1.4 | Colombia |
| Female | 1996 | 1.4 | 1.2 | 1.6 | Colombia |
| Female | 1997 | 1.3 | 1.1 | 1.5 | Colombia |
| Female | 1998 | 1.1 | 1.0 | 1.3 | Colombia |
| Female | 1999 | 1.2 | 1.0 | 1.3 | Colombia |
| Female | 2000 | 1.3 | 1.1 | 1.4 | Colombia |
| Female | 2001 | 1.1 | 1.0 | 1.3 | Colombia |
| Female | 2002 | 1.0 | 0.9 | 1.2 | Colombia |
| Female | 2003 | 1.1 | 1.0 | 1.2 | Colombia |
| Female | 2004 | 0.9 | 0.8 | 1.0 | Colombia |
| Female | 2005 | 0.9 | 0.8 | 1.0 | Colombia |
| Female | 2006 | 0.9 | 0.8 | 1.0 | Colombia |
| Female | 2007 | 0.8 | 0.7 | 0.9 | Colombia |
| Female | 2008 | 0.9 | 0.7 | 1.0 | Colombia |
| Female | 2009 | 0.8 | 0.7 | 0.9 | Colombia |
| Female | 2010 | 0.8 | 0.7 | 0.9 | Colombia |
| Female | 2011 | 0.6 | 0.5 | 0.7 | Colombia |
| Female | 2012 | 0.6 | 0.5 | 0.7 | Colombia |
| Female | 2013 | 0.5 | 0.5 | 0.6 | Colombia |
| Female | 2014 | 0.7 | 0.6 | 0.7 | Colombia |

|        |      |     |       |     |            |
|--------|------|-----|-------|-----|------------|
| Female | 2015 | 0.6 | 0.5   | 0.6 | Colombia   |
| Female | 2016 | 0.6 | 0.5   | 0.6 | Colombia   |
| Female | 2017 | 0.6 | 0.5   | 0.7 | Colombia   |
| Female | 1980 | 0.5 | 0.1   | 1.0 | Costa Rica |
| Female | 1981 | 1.3 | 0.5   | 2.0 | Costa Rica |
| Female | 1982 | 1.3 | 0.5   | 2.0 | Costa Rica |
| Female | 1983 | 1.4 | 0.6   | 2.1 | Costa Rica |
| Female | 1984 | 1.1 | 0.4   | 1.7 | Costa Rica |
| Female | 1985 | 2.1 | 1.2   | 3.0 | Costa Rica |
| Female | 1986 | 1.1 | 0.4   | 1.7 | Costa Rica |
| Female | 1987 | 1.0 | 0.4   | 1.6 | Costa Rica |
| Female | 1988 | 1.6 | 0.9   | 2.3 | Costa Rica |
| Female | 1989 | 1.1 | 0.5   | 1.7 | Costa Rica |
| Female | 1990 | 0.5 | 0.2   | 0.8 | Costa Rica |
| Female | 1991 | 0.7 | 0.2   | 1.1 | Costa Rica |
| Female | 1992 | 0.8 | 0.3   | 1.3 | Costa Rica |
| Female | 1993 | 0.6 | 0.2   | 1.1 | Costa Rica |
| Female | 1994 | 1.0 | 0.5   | 1.5 | Costa Rica |
| Female | 1995 | 0.8 | 0.4   | 1.3 | Costa Rica |
| Female | 1996 | 0.7 | 0.3   | 1.1 | Costa Rica |
| Female | 1997 | 1.3 | 0.8   | 1.9 | Costa Rica |
| Female | 1998 | 0.6 | 0.3   | 0.9 | Costa Rica |
| Female | 1999 | 0.3 | 0.1   | 0.5 | Costa Rica |
| Female | 2000 | 0.5 | 0.3   | 0.7 | Costa Rica |
| Female | 2001 | 0.5 | 0.2   | 0.8 | Costa Rica |
| Female | 2002 | 0.3 | 0.1   | 0.5 | Costa Rica |
| Female | 2003 | 0.4 | 0.2   | 0.6 | Costa Rica |
| Female | 2004 | 0.4 | 0.2   | 0.7 | Costa Rica |
| Female | 2005 | 0.4 | 0.2   | 0.7 | Costa Rica |
| Female | 2006 | 0.5 | 0.2   | 0.7 | Costa Rica |
| Female | 2007 | 0.2 | 0.1   | 0.4 | Costa Rica |
| Female | 2008 | 0.3 | 0.1   | 0.5 | Costa Rica |
| Female | 2009 | 0.4 | 0.2   | 0.6 | Costa Rica |
| Female | 2010 | 0.4 | 0.2   | 0.6 | Costa Rica |
| Female | 2011 | 0.3 | 0.1   | 0.5 | Costa Rica |
| Female | 2012 | 0.4 | 0.2   | 0.7 | Costa Rica |
| Female | 2013 | 0.4 | 0.2   | 0.6 | Costa Rica |
| Female | 2014 | 0.3 | 0.1   | 0.5 | Costa Rica |
| Female | 2015 | 0.2 | 0.1   | 0.4 | Costa Rica |
| Female | 2016 | 0.4 | 0.2   | 0.5 | Costa Rica |
| Female | 2017 | 0.1 | 0.0   | 0.2 | Costa Rica |
| Female | 2018 | 0.2 | 0.1   | 0.3 | Costa Rica |
| Female | 2019 | 0.3 | 0.1   | 0.4 | Costa Rica |
| Female | 1999 | 0.4 | (0.1) | 0.9 | Cyprus     |
| Female | 2005 | 0.2 | (0.1) | 0.6 | Cyprus     |
| Female | 2006 | 0.1 | (0.1) | 0.4 | Cyprus     |

|        |      |     |       |     |                |
|--------|------|-----|-------|-----|----------------|
| Female | 2007 | 0.3 | (0.0) | 0.5 | Cyprus         |
| Female | 2008 | 0.1 | (0.0) | 0.1 | Cyprus         |
| Female | 2009 | 0.5 | 0.1   | 1.0 | Cyprus         |
| Female | 2011 | 0.2 | (0.1) | 0.5 | Cyprus         |
| Female | 2012 | 0.4 | (0.1) | 0.9 | Cyprus         |
| Female | 2016 | 0.1 | (0.1) | 0.3 | Cyprus         |
| Female | 2017 | 0.2 | (0.0) | 0.4 | Cyprus         |
| Female | 2018 | 0.1 | (0.1) | 0.3 | Cyprus         |
| Female | 1986 | 0.4 | 0.3   | 0.5 | Czech Republic |
| Female | 1987 | 0.4 | 0.3   | 0.6 | Czech Republic |
| Female | 1988 | 0.4 | 0.3   | 0.5 | Czech Republic |
| Female | 1989 | 0.5 | 0.4   | 0.6 | Czech Republic |
| Female | 1990 | 0.4 | 0.3   | 0.5 | Czech Republic |
| Female | 1991 | 0.6 | 0.4   | 0.7 | Czech Republic |
| Female | 1992 | 0.6 | 0.5   | 0.7 | Czech Republic |
| Female | 1993 | 0.5 | 0.4   | 0.6 | Czech Republic |
| Female | 1994 | 0.4 | 0.3   | 0.5 | Czech Republic |
| Female | 1995 | 0.5 | 0.4   | 0.7 | Czech Republic |
| Female | 1996 | 0.6 | 0.5   | 0.7 | Czech Republic |
| Female | 1997 | 0.5 | 0.4   | 0.7 | Czech Republic |
| Female | 1998 | 0.5 | 0.4   | 0.6 | Czech Republic |
| Female | 1999 | 0.6 | 0.5   | 0.8 | Czech Republic |
| Female | 2000 | 0.6 | 0.4   | 0.7 | Czech Republic |
| Female | 2001 | 0.5 | 0.4   | 0.6 | Czech Republic |
| Female | 2002 | 0.5 | 0.4   | 0.6 | Czech Republic |
| Female | 2003 | 0.5 | 0.4   | 0.7 | Czech Republic |
| Female | 2004 | 0.6 | 0.5   | 0.8 | Czech Republic |
| Female | 2005 | 0.5 | 0.4   | 0.7 | Czech Republic |
| Female | 2006 | 0.5 | 0.4   | 0.7 | Czech Republic |
| Female | 2007 | 0.6 | 0.4   | 0.7 | Czech Republic |
| Female | 2008 | 0.7 | 0.6   | 0.9 | Czech Republic |
| Female | 2009 | 0.6 | 0.4   | 0.7 | Czech Republic |
| Female | 2010 | 0.8 | 0.6   | 0.9 | Czech Republic |
| Female | 2011 | 0.7 | 0.6   | 0.9 | Czech Republic |
| Female | 2012 | 0.8 | 0.6   | 0.9 | Czech Republic |
| Female | 2013 | 0.8 | 0.6   | 0.9 | Czech Republic |
| Female | 2014 | 0.8 | 0.6   | 0.9 | Czech Republic |
| Female | 2015 | 0.6 | 0.5   | 0.8 | Czech Republic |
| Female | 2016 | 0.7 | 0.6   | 0.9 | Czech Republic |
| Female | 2017 | 0.7 | 0.6   | 0.9 | Czech Republic |
| Female | 2018 | 0.6 | 0.4   | 0.7 | Czech Republic |
| Female | 2019 | 0.6 | 0.5   | 0.7 | Czech Republic |
| Female | 1979 | 0.7 | 0.4   | 1.0 | Ecuador        |
| Female | 1980 | 0.6 | 0.4   | 0.9 | Ecuador        |
| Female | 1981 | 0.6 | 0.3   | 0.8 | Ecuador        |
| Female | 1982 | 0.7 | 0.4   | 1.0 | Ecuador        |

|        |      |     |       |     |         |
|--------|------|-----|-------|-----|---------|
| Female | 1983 | 0.7 | 0.4   | 1.0 | Ecuador |
| Female | 1984 | 0.5 | 0.3   | 0.7 | Ecuador |
| Female | 1985 | 0.6 | 0.3   | 0.9 | Ecuador |
| Female | 1986 | 0.7 | 0.4   | 0.9 | Ecuador |
| Female | 1987 | 0.5 | 0.2   | 0.7 | Ecuador |
| Female | 1988 | 0.7 | 0.4   | 1.0 | Ecuador |
| Female | 1989 | 0.6 | 0.3   | 0.8 | Ecuador |
| Female | 1990 | 0.7 | 0.4   | 1.0 | Ecuador |
| Female | 1991 | 0.4 | 0.2   | 0.6 | Ecuador |
| Female | 1992 | 0.6 | 0.4   | 0.8 | Ecuador |
| Female | 1993 | 0.4 | 0.2   | 0.6 | Ecuador |
| Female | 1994 | 0.5 | 0.3   | 0.7 | Ecuador |
| Female | 1995 | 0.2 | 0.1   | 0.4 | Ecuador |
| Female | 1996 | 0.2 | 0.1   | 0.3 | Ecuador |
| Female | 1997 | 0.5 | 0.3   | 0.6 | Ecuador |
| Female | 1998 | 0.4 | 0.3   | 0.6 | Ecuador |
| Female | 1999 | 0.2 | 0.1   | 0.3 | Ecuador |
| Female | 2000 | 0.4 | 0.2   | 0.5 | Ecuador |
| Female | 2001 | 0.5 | 0.3   | 0.7 | Ecuador |
| Female | 2002 | 0.3 | 0.2   | 0.4 | Ecuador |
| Female | 2003 | 0.3 | 0.2   | 0.5 | Ecuador |
| Female | 2004 | 0.2 | 0.1   | 0.4 | Ecuador |
| Female | 2005 | 0.5 | 0.3   | 0.6 | Ecuador |
| Female | 2006 | 0.3 | 0.2   | 0.5 | Ecuador |
| Female | 2007 | 0.3 | 0.2   | 0.4 | Ecuador |
| Female | 2008 | 0.2 | 0.1   | 0.3 | Ecuador |
| Female | 2009 | 0.3 | 0.2   | 0.4 | Ecuador |
| Female | 2010 | 0.2 | 0.1   | 0.3 | Ecuador |
| Female | 2011 | 0.2 | 0.1   | 0.3 | Ecuador |
| Female | 2012 | 0.3 | 0.2   | 0.4 | Ecuador |
| Female | 2013 | 0.3 | 0.2   | 0.4 | Ecuador |
| Female | 2014 | 0.2 | 0.1   | 0.3 | Ecuador |
| Female | 2015 | 0.3 | 0.2   | 0.4 | Ecuador |
| Female | 2016 | 0.2 | 0.1   | 0.3 | Ecuador |
| Female | 2017 | 0.2 | 0.1   | 0.3 | Ecuador |
| Female | 1981 | 0.3 | 0.1   | 0.5 | Estonia |
| Female | 1982 | 0.6 | 0.3   | 1.0 | Estonia |
| Female | 1985 | 0.7 | 0.3   | 1.2 | Estonia |
| Female | 1986 | 0.3 | 0.0   | 0.5 | Estonia |
| Female | 1987 | 0.7 | 0.3   | 1.1 | Estonia |
| Female | 1988 | 0.6 | 0.2   | 1.0 | Estonia |
| Female | 1989 | 0.4 | 0.2   | 0.7 | Estonia |
| Female | 1990 | 0.8 | 0.4   | 1.3 | Estonia |
| Female | 1991 | 0.7 | 0.4   | 1.1 | Estonia |
| Female | 1992 | 0.3 | 0.0   | 0.6 | Estonia |
| Female | 1993 | 0.2 | (0.0) | 0.5 | Estonia |

|        |      |     |     |     |         |
|--------|------|-----|-----|-----|---------|
| Female | 1994 | 0.4 | 0.1 | 0.7 | Estonia |
| Female | 1995 | 0.5 | 0.2 | 0.8 | Estonia |
| Female | 1996 | 0.6 | 0.3 | 0.9 | Estonia |
| Female | 1997 | 0.4 | 0.1 | 0.7 | Estonia |
| Female | 1998 | 0.3 | 0.1 | 0.5 | Estonia |
| Female | 1999 | 0.2 | 0.1 | 0.4 | Estonia |
| Female | 2000 | 0.2 | 0.0 | 0.4 | Estonia |
| Female | 2001 | 0.5 | 0.1 | 0.8 | Estonia |
| Female | 2002 | 0.5 | 0.2 | 0.8 | Estonia |
| Female | 2003 | 0.4 | 0.2 | 0.7 | Estonia |
| Female | 2004 | 0.6 | 0.3 | 1.0 | Estonia |
| Female | 2005 | 0.2 | 0.1 | 0.4 | Estonia |
| Female | 2006 | 0.2 | 0.0 | 0.3 | Estonia |
| Female | 2007 | 0.5 | 0.2 | 0.8 | Estonia |
| Female | 2008 | 0.3 | 0.1 | 0.5 | Estonia |
| Female | 2009 | 0.5 | 0.2 | 0.8 | Estonia |
| Female | 2010 | 0.8 | 0.4 | 1.3 | Estonia |
| Female | 2011 | 0.3 | 0.1 | 0.5 | Estonia |
| Female | 2012 | 1.1 | 0.6 | 1.6 | Estonia |
| Female | 2013 | 0.6 | 0.3 | 0.9 | Estonia |
| Female | 2014 | 1.0 | 0.5 | 1.5 | Estonia |
| Female | 2015 | 0.5 | 0.2 | 0.8 | Estonia |
| Female | 2016 | 0.8 | 0.4 | 1.2 | Estonia |
| Female | 2017 | 0.8 | 0.4 | 1.2 | Estonia |
| Female | 2018 | 0.6 | 0.2 | 0.9 | Estonia |
| Female | 2019 | 1.0 | 0.5 | 1.4 | Estonia |
| Female | 1979 | 1.0 | 0.9 | 1.1 | France  |
| Female | 1980 | 1.0 | 0.9 | 1.0 | France  |
| Female | 1981 | 0.8 | 0.8 | 0.9 | France  |
| Female | 1982 | 0.9 | 0.9 | 1.0 | France  |
| Female | 1983 | 0.9 | 0.9 | 1.0 | France  |
| Female | 1984 | 0.9 | 0.9 | 1.0 | France  |
| Female | 1985 | 0.9 | 0.8 | 1.0 | France  |
| Female | 1986 | 0.9 | 0.8 | 1.0 | France  |
| Female | 1987 | 0.9 | 0.9 | 1.0 | France  |
| Female | 1988 | 0.9 | 0.9 | 1.0 | France  |
| Female | 1989 | 0.9 | 0.8 | 1.0 | France  |
| Female | 1990 | 1.0 | 1.0 | 1.1 | France  |
| Female | 1991 | 0.9 | 0.8 | 1.0 | France  |
| Female | 1992 | 0.9 | 0.9 | 1.0 | France  |
| Female | 1993 | 1.0 | 0.9 | 1.0 | France  |
| Female | 1994 | 0.9 | 0.9 | 1.0 | France  |
| Female | 1995 | 0.9 | 0.9 | 1.0 | France  |
| Female | 1996 | 0.9 | 0.9 | 1.0 | France  |
| Female | 1997 | 1.0 | 0.9 | 1.0 | France  |
| Female | 1998 | 1.0 | 0.9 | 1.1 | France  |



|        |      |     |     |     |         |
|--------|------|-----|-----|-----|---------|
| Female | 1999 | 1.0 | 0.9 | 1.0 | France  |
| Female | 2000 | 1.0 | 0.9 | 1.0 | France  |
| Female | 2001 | 0.9 | 0.8 | 1.0 | France  |
| Female | 2002 | 1.0 | 0.9 | 1.0 | France  |
| Female | 2003 | 0.9 | 0.8 | 1.0 | France  |
| Female | 2004 | 0.9 | 0.8 | 0.9 | France  |
| Female | 2005 | 0.8 | 0.8 | 0.9 | France  |
| Female | 2006 | 0.9 | 0.8 | 0.9 | France  |
| Female | 2007 | 0.9 | 0.9 | 1.0 | France  |
| Female | 2008 | 0.9 | 0.8 | 0.9 | France  |
| Female | 2009 | 1.0 | 0.9 | 1.0 | France  |
| Female | 2010 | 0.9 | 0.9 | 1.0 | France  |
| Female | 2011 | 1.0 | 0.9 | 1.0 | France  |
| Female | 2012 | 0.8 | 0.8 | 0.9 | France  |
| Female | 2013 | 0.9 | 0.8 | 0.9 | France  |
| Female | 2014 | 0.9 | 0.8 | 0.9 | France  |
| Female | 2015 | 0.9 | 0.8 | 1.0 | France  |
| Female | 2016 | 0.9 | 0.8 | 0.9 | France  |
| Female | 1990 | 0.7 | 0.7 | 0.8 | Germany |
| Female | 1991 | 0.8 | 0.7 | 0.8 | Germany |
| Female | 1992 | 0.8 | 0.7 | 0.8 | Germany |
| Female | 1993 | 0.9 | 0.8 | 0.9 | Germany |
| Female | 1994 | 0.8 | 0.8 | 0.9 | Germany |
| Female | 1995 | 0.9 | 0.8 | 0.9 | Germany |
| Female | 1996 | 0.9 | 0.8 | 1.0 | Germany |
| Female | 1997 | 0.9 | 0.8 | 1.0 | Germany |
| Female | 1998 | 0.8 | 0.8 | 0.9 | Germany |
| Female | 1999 | 0.9 | 0.8 | 0.9 | Germany |
| Female | 2000 | 0.9 | 0.8 | 0.9 | Germany |
| Female | 2001 | 0.9 | 0.9 | 1.0 | Germany |
| Female | 2002 | 1.0 | 0.9 | 1.0 | Germany |
| Female | 2003 | 0.9 | 0.9 | 1.0 | Germany |
| Female | 2004 | 1.0 | 0.9 | 1.0 | Germany |
| Female | 2005 | 1.0 | 0.9 | 1.0 | Germany |
| Female | 2006 | 0.9 | 0.9 | 1.0 | Germany |
| Female | 2007 | 1.0 | 0.9 | 1.0 | Germany |
| Female | 2008 | 1.0 | 1.0 | 1.1 | Germany |
| Female | 2009 | 1.0 | 0.9 | 1.0 | Germany |
| Female | 2010 | 1.0 | 0.9 | 1.0 | Germany |
| Female | 2011 | 1.0 | 0.9 | 1.0 | Germany |
| Female | 2012 | 1.0 | 1.0 | 1.1 | Germany |
| Female | 2013 | 0.9 | 0.9 | 1.0 | Germany |
| Female | 2014 | 1.0 | 0.9 | 1.0 | Germany |
| Female | 2015 | 0.9 | 0.9 | 1.0 | Germany |
| Female | 2016 | 0.9 | 0.9 | 1.0 | Germany |
| Female | 2017 | 0.9 | 0.9 | 1.0 | Germany |

|        |      |     |     |     |                  |
|--------|------|-----|-----|-----|------------------|
| Female | 2018 | 1.0 | 0.9 | 1.0 | Germany          |
| Female | 2019 | 1.0 | 0.9 | 1.0 | Germany          |
| Female | 1979 | 2.4 | 1.9 | 3.0 | Hong Kong, China |
| Female | 1980 | 2.1 | 1.5 | 2.6 | Hong Kong, China |
| Female | 1981 | 1.9 | 1.4 | 2.5 | Hong Kong, China |
| Female | 1982 | 2.1 | 1.5 | 2.6 | Hong Kong, China |
| Female | 1983 | 2.6 | 2.0 | 3.2 | Hong Kong, China |
| Female | 1984 | 1.7 | 1.3 | 2.2 | Hong Kong, China |
| Female | 1985 | 1.9 | 1.4 | 2.4 | Hong Kong, China |
| Female | 1986 | 1.7 | 1.3 | 2.1 | Hong Kong, China |
| Female | 1987 | 1.7 | 1.3 | 2.1 | Hong Kong, China |
| Female | 1988 | 1.6 | 1.2 | 2.0 | Hong Kong, China |
| Female | 1989 | 1.8 | 1.4 | 2.3 | Hong Kong, China |
| Female | 1990 | 1.3 | 1.0 | 1.7 | Hong Kong, China |
| Female | 1991 | 1.5 | 1.1 | 1.9 | Hong Kong, China |
| Female | 1992 | 1.4 | 1.0 | 1.8 | Hong Kong, China |
| Female | 1993 | 1.2 | 0.9 | 1.5 | Hong Kong, China |
| Female | 1994 | 1.4 | 1.1 | 1.7 | Hong Kong, China |
| Female | 1995 | 1.3 | 1.0 | 1.6 | Hong Kong, China |
| Female | 1996 | 1.3 | 1.0 | 1.6 | Hong Kong, China |
| Female | 1997 | 1.2 | 0.9 | 1.4 | Hong Kong, China |
| Female | 1998 | 1.0 | 0.8 | 1.3 | Hong Kong, China |
| Female | 1999 | 1.2 | 0.9 | 1.4 | Hong Kong, China |
| Female | 2000 | 1.0 | 0.8 | 1.2 | Hong Kong, China |
| Female | 2001 | 0.9 | 0.7 | 1.1 | Hong Kong, China |
| Female | 2002 | 0.9 | 0.7 | 1.1 | Hong Kong, China |
| Female | 2003 | 1.0 | 0.7 | 1.2 | Hong Kong, China |
| Female | 2004 | 1.0 | 0.8 | 1.3 | Hong Kong, China |
| Female | 2005 | 0.9 | 0.7 | 1.1 | Hong Kong, China |
| Female | 2006 | 0.8 | 0.6 | 1.0 | Hong Kong, China |
| Female | 2007 | 0.9 | 0.7 | 1.0 | Hong Kong, China |
| Female | 2008 | 0.7 | 0.6 | 0.9 | Hong Kong, China |
| Female | 2009 | 0.6 | 0.4 | 0.7 | Hong Kong, China |
| Female | 2010 | 0.6 | 0.4 | 0.7 | Hong Kong, China |
| Female | 2011 | 0.6 | 0.4 | 0.7 | Hong Kong, China |
| Female | 2012 | 0.5 | 0.4 | 0.7 | Hong Kong, China |
| Female | 2013 | 0.6 | 0.4 | 0.7 | Hong Kong, China |
| Female | 2014 | 0.6 | 0.5 | 0.8 | Hong Kong, China |
| Female | 2015 | 0.4 | 0.3 | 0.5 | Hong Kong, China |
| Female | 2016 | 0.5 | 0.3 | 0.6 | Hong Kong, China |
| Female | 2017 | 0.5 | 0.4 | 0.6 | Hong Kong, China |
| Female | 1979 | 3.2 | 2.6 | 3.9 | Ireland          |
| Female | 1980 | 4.0 | 3.3 | 4.8 | Ireland          |
| Female | 1981 | 3.6 | 2.9 | 4.4 | Ireland          |
| Female | 1982 | 3.7 | 2.9 | 4.4 | Ireland          |
| Female | 1983 | 3.9 | 3.2 | 4.7 | Ireland          |

|        |      |     |     |     |         |
|--------|------|-----|-----|-----|---------|
| Female | 1984 | 3.1 | 2.5 | 3.7 | Ireland |
| Female | 1985 | 3.2 | 2.6 | 3.9 | Ireland |
| Female | 1986 | 3.7 | 3.0 | 4.4 | Ireland |
| Female | 1987 | 3.5 | 2.8 | 4.1 | Ireland |
| Female | 1988 | 3.2 | 2.6 | 3.8 | Ireland |
| Female | 1989 | 3.9 | 3.2 | 4.6 | Ireland |
| Female | 1990 | 3.7 | 3.0 | 4.3 | Ireland |
| Female | 1991 | 3.0 | 2.4 | 3.6 | Ireland |
| Female | 1992 | 3.8 | 3.1 | 4.5 | Ireland |
| Female | 1993 | 2.8 | 2.3 | 3.4 | Ireland |
| Female | 1994 | 3.7 | 3.1 | 4.4 | Ireland |
| Female | 1995 | 3.7 | 3.0 | 4.3 | Ireland |
| Female | 1996 | 3.2 | 2.6 | 3.8 | Ireland |
| Female | 1997 | 2.8 | 2.3 | 3.3 | Ireland |
| Female | 1998 | 2.7 | 2.2 | 3.2 | Ireland |
| Female | 1999 | 3.0 | 2.5 | 3.6 | Ireland |
| Female | 2000 | 2.8 | 2.3 | 3.3 | Ireland |
| Female | 2001 | 3.4 | 2.8 | 4.0 | Ireland |
| Female | 2002 | 2.4 | 1.9 | 2.8 | Ireland |
| Female | 2003 | 2.6 | 2.1 | 3.0 | Ireland |
| Female | 2004 | 3.0 | 2.5 | 3.5 | Ireland |
| Female | 2005 | 2.8 | 2.3 | 3.4 | Ireland |
| Female | 2006 | 2.6 | 2.1 | 3.1 | Ireland |
| Female | 2007 | 2.5 | 2.0 | 2.9 | Ireland |
| Female | 2008 | 2.5 | 2.0 | 2.9 | Ireland |
| Female | 2009 | 2.4 | 1.9 | 2.8 | Ireland |
| Female | 2010 | 2.1 | 1.7 | 2.4 | Ireland |
| Female | 2011 | 2.4 | 2.0 | 2.8 | Ireland |
| Female | 2012 | 2.7 | 2.2 | 3.1 | Ireland |
| Female | 2013 | 2.3 | 1.9 | 2.7 | Ireland |
| Female | 2014 | 2.1 | 1.7 | 2.5 | Ireland |
| Female | 2015 | 2.2 | 1.9 | 2.6 | Ireland |
| Female | 1979 | 0.8 | 0.5 | 1.2 | Israel  |
| Female | 1980 | 1.2 | 0.8 | 1.6 | Israel  |
| Female | 1981 | 0.9 | 0.6 | 1.3 | Israel  |
| Female | 1982 | 1.2 | 0.8 | 1.6 | Israel  |
| Female | 1983 | 0.9 | 0.6 | 1.2 | Israel  |
| Female | 1984 | 0.9 | 0.6 | 1.2 | Israel  |
| Female | 1985 | 0.5 | 0.3 | 0.7 | Israel  |
| Female | 1986 | 0.5 | 0.3 | 0.7 | Israel  |
| Female | 1987 | 0.8 | 0.5 | 1.1 | Israel  |
| Female | 1988 | 0.7 | 0.4 | 0.9 | Israel  |
| Female | 1989 | 0.8 | 0.5 | 1.2 | Israel  |
| Female | 1990 | 0.7 | 0.4 | 0.9 | Israel  |
| Female | 1991 | 1.1 | 0.8 | 1.4 | Israel  |
| Female | 1992 | 0.5 | 0.3 | 0.7 | Israel  |

|        |      |     |     |     |        |
|--------|------|-----|-----|-----|--------|
| Female | 1993 | 0.8 | 0.5 | 1.0 | Israel |
| Female | 1994 | 0.5 | 0.3 | 0.6 | Israel |
| Female | 1995 | 0.6 | 0.4 | 0.8 | Israel |
| Female | 1996 | 0.8 | 0.5 | 1.0 | Israel |
| Female | 1997 | 0.7 | 0.5 | 1.0 | Israel |
| Female | 1998 | 0.6 | 0.4 | 0.8 | Israel |
| Female | 1999 | 0.6 | 0.4 | 0.8 | Israel |
| Female | 2000 | 0.7 | 0.5 | 0.9 | Israel |
| Female | 2001 | 0.5 | 0.3 | 0.6 | Israel |
| Female | 2002 | 0.6 | 0.4 | 0.8 | Israel |
| Female | 2003 | 0.5 | 0.4 | 0.7 | Israel |
| Female | 2004 | 0.5 | 0.3 | 0.7 | Israel |
| Female | 2005 | 0.9 | 0.7 | 1.1 | Israel |
| Female | 2006 | 0.6 | 0.4 | 0.8 | Israel |
| Female | 2007 | 0.6 | 0.4 | 0.7 | Israel |
| Female | 2008 | 0.5 | 0.4 | 0.7 | Israel |
| Female | 2009 | 0.5 | 0.3 | 0.6 | Israel |
| Female | 2010 | 0.5 | 0.3 | 0.6 | Israel |
| Female | 2011 | 0.4 | 0.3 | 0.5 | Israel |
| Female | 2012 | 0.6 | 0.4 | 0.7 | Israel |
| Female | 2013 | 0.5 | 0.3 | 0.6 | Israel |
| Female | 2014 | 0.6 | 0.4 | 0.8 | Israel |
| Female | 2015 | 0.5 | 0.4 | 0.7 | Israel |
| Female | 2016 | 0.5 | 0.4 | 0.7 | Israel |
| Female | 2017 | 0.4 | 0.3 | 0.6 | Israel |
| Female | 2018 | 0.5 | 0.3 | 0.6 | Israel |
| Female | 1979 | 0.7 | 0.7 | 0.8 | Italy  |
| Female | 1980 | 0.8 | 0.7 | 0.8 | Italy  |
| Female | 1981 | 0.7 | 0.6 | 0.8 | Italy  |
| Female | 1982 | 0.7 | 0.6 | 0.8 | Italy  |
| Female | 1983 | 0.6 | 0.6 | 0.7 | Italy  |
| Female | 1984 | 0.6 | 0.6 | 0.7 | Italy  |
| Female | 1985 | 0.7 | 0.6 | 0.8 | Italy  |
| Female | 1986 | 0.7 | 0.6 | 0.7 | Italy  |
| Female | 1987 | 0.6 | 0.6 | 0.7 | Italy  |
| Female | 1988 | 0.7 | 0.6 | 0.7 | Italy  |
| Female | 1989 | 0.6 | 0.5 | 0.6 | Italy  |
| Female | 1990 | 0.6 | 0.5 | 0.6 | Italy  |
| Female | 1991 | 0.6 | 0.5 | 0.6 | Italy  |
| Female | 1992 | 0.5 | 0.5 | 0.6 | Italy  |
| Female | 1993 | 0.6 | 0.5 | 0.6 | Italy  |
| Female | 1994 | 0.6 | 0.5 | 0.6 | Italy  |
| Female | 1995 | 0.5 | 0.5 | 0.6 | Italy  |
| Female | 1996 | 0.5 | 0.5 | 0.6 | Italy  |
| Female | 1997 | 0.5 | 0.5 | 0.6 | Italy  |
| Female | 1998 | 0.6 | 0.5 | 0.6 | Italy  |

|        |      |     |     |     |       |
|--------|------|-----|-----|-----|-------|
| Female | 1999 | 0.6 | 0.5 | 0.6 | Italy |
| Female | 2000 | 0.5 | 0.4 | 0.5 | Italy |
| Female | 2001 | 0.5 | 0.5 | 0.6 | Italy |
| Female | 2002 | 0.5 | 0.5 | 0.5 | Italy |
| Female | 2003 | 0.4 | 0.4 | 0.5 | Italy |
| Female | 2004 | 0.4 | 0.4 | 0.4 | Italy |
| Female | 2005 | 0.4 | 0.4 | 0.5 | Italy |
| Female | 2006 | 0.4 | 0.4 | 0.5 | Italy |
| Female | 2007 | 0.4 | 0.4 | 0.5 | Italy |
| Female | 2008 | 0.4 | 0.4 | 0.5 | Italy |
| Female | 2009 | 0.4 | 0.4 | 0.5 | Italy |
| Female | 2010 | 0.4 | 0.4 | 0.4 | Italy |
| Female | 2011 | 0.4 | 0.4 | 0.4 | Italy |
| Female | 2012 | 0.4 | 0.4 | 0.4 | Italy |
| Female | 2013 | 0.4 | 0.3 | 0.4 | Italy |
| Female | 2014 | 0.4 | 0.3 | 0.4 | Italy |
| Female | 2015 | 0.4 | 0.4 | 0.5 | Italy |
| Female | 2016 | 0.4 | 0.4 | 0.5 | Italy |
| Female | 2017 | 0.5 | 0.4 | 0.5 | Italy |
| Female | 1979 | 1.2 | 1.1 | 1.3 | Japan |
| Female | 1980 | 1.3 | 1.2 | 1.4 | Japan |
| Female | 1981 | 1.2 | 1.1 | 1.2 | Japan |
| Female | 1982 | 1.2 | 1.1 | 1.3 | Japan |
| Female | 1983 | 1.1 | 1.0 | 1.2 | Japan |
| Female | 1984 | 1.0 | 0.9 | 1.1 | Japan |
| Female | 1985 | 1.0 | 0.9 | 1.0 | Japan |
| Female | 1986 | 0.9 | 0.9 | 1.0 | Japan |
| Female | 1987 | 0.9 | 0.8 | 0.9 | Japan |
| Female | 1988 | 0.9 | 0.8 | 0.9 | Japan |
| Female | 1989 | 0.8 | 0.8 | 0.9 | Japan |
| Female | 1990 | 0.9 | 0.8 | 0.9 | Japan |
| Female | 1991 | 0.9 | 0.8 | 0.9 | Japan |
| Female | 1992 | 0.8 | 0.8 | 0.9 | Japan |
| Female | 1993 | 0.8 | 0.8 | 0.8 | Japan |
| Female | 1994 | 0.8 | 0.8 | 0.9 | Japan |
| Female | 1995 | 0.8 | 0.7 | 0.8 | Japan |
| Female | 1996 | 0.8 | 0.8 | 0.9 | Japan |
| Female | 1997 | 0.8 | 0.8 | 0.9 | Japan |
| Female | 1998 | 0.8 | 0.7 | 0.8 | Japan |
| Female | 1999 | 0.8 | 0.8 | 0.8 | Japan |
| Female | 2000 | 0.8 | 0.8 | 0.8 | Japan |
| Female | 2001 | 0.8 | 0.8 | 0.9 | Japan |
| Female | 2002 | 0.8 | 0.8 | 0.9 | Japan |
| Female | 2003 | 0.8 | 0.8 | 0.8 | Japan |
| Female | 2004 | 0.8 | 0.8 | 0.9 | Japan |
| Female | 2005 | 0.8 | 0.8 | 0.8 | Japan |

|        |      |     |     |     |                   |
|--------|------|-----|-----|-----|-------------------|
| Female | 2006 | 0.7 | 0.7 | 0.8 | Japan             |
| Female | 2007 | 0.8 | 0.8 | 0.8 | Japan             |
| Female | 2008 | 0.8 | 0.7 | 0.8 | Japan             |
| Female | 2009 | 0.8 | 0.7 | 0.8 | Japan             |
| Female | 2010 | 0.8 | 0.7 | 0.8 | Japan             |
| Female | 2011 | 0.8 | 0.7 | 0.8 | Japan             |
| Female | 2012 | 0.8 | 0.7 | 0.8 | Japan             |
| Female | 2013 | 0.8 | 0.7 | 0.8 | Japan             |
| Female | 2014 | 0.8 | 0.8 | 0.8 | Japan             |
| Female | 2015 | 0.8 | 0.7 | 0.8 | Japan             |
| Female | 2016 | 0.8 | 0.7 | 0.8 | Japan             |
| Female | 2017 | 0.8 | 0.7 | 0.8 | Japan             |
| Female | 2018 | 0.8 | 0.7 | 0.8 | Japan             |
| Female | 1985 | 0.7 | 0.6 | 0.9 | Republic of Korea |
| Female | 1986 | 0.7 | 0.6 | 0.8 | Republic of Korea |
| Female | 1987 | 0.8 | 0.7 | 0.9 | Republic of Korea |
| Female | 1988 | 0.6 | 0.5 | 0.7 | Republic of Korea |
| Female | 1989 | 0.7 | 0.6 | 0.8 | Republic of Korea |
| Female | 1990 | 0.6 | 0.5 | 0.7 | Republic of Korea |
| Female | 1991 | 0.6 | 0.5 | 0.7 | Republic of Korea |
| Female | 1992 | 0.6 | 0.5 | 0.7 | Republic of Korea |
| Female | 1993 | 0.6 | 0.5 | 0.7 | Republic of Korea |
| Female | 1994 | 0.6 | 0.5 | 0.7 | Republic of Korea |
| Female | 1995 | 0.7 | 0.6 | 0.9 | Republic of Korea |
| Female | 1996 | 0.6 | 0.5 | 0.7 | Republic of Korea |
| Female | 1997 | 0.6 | 0.5 | 0.7 | Republic of Korea |
| Female | 1998 | 0.5 | 0.4 | 0.6 | Republic of Korea |
| Female | 1999 | 0.4 | 0.4 | 0.5 | Republic of Korea |
| Female | 2000 | 0.4 | 0.4 | 0.5 | Republic of Korea |
| Female | 2001 | 0.4 | 0.3 | 0.5 | Republic of Korea |
| Female | 2002 | 0.4 | 0.3 | 0.4 | Republic of Korea |
| Female | 2003 | 0.3 | 0.3 | 0.4 | Republic of Korea |
| Female | 2004 | 0.3 | 0.3 | 0.4 | Republic of Korea |
| Female | 2005 | 0.2 | 0.2 | 0.3 | Republic of Korea |
| Female | 2006 | 0.3 | 0.2 | 0.3 | Republic of Korea |
| Female | 2007 | 0.3 | 0.2 | 0.3 | Republic of Korea |
| Female | 2008 | 0.3 | 0.2 | 0.3 | Republic of Korea |
| Female | 2009 | 0.2 | 0.2 | 0.2 | Republic of Korea |
| Female | 2010 | 0.2 | 0.1 | 0.2 | Republic of Korea |
| Female | 2011 | 0.2 | 0.2 | 0.3 | Republic of Korea |
| Female | 2012 | 0.2 | 0.2 | 0.2 | Republic of Korea |
| Female | 2013 | 0.2 | 0.2 | 0.3 | Republic of Korea |
| Female | 2014 | 0.2 | 0.2 | 0.2 | Republic of Korea |
| Female | 2015 | 0.2 | 0.1 | 0.2 | Republic of Korea |
| Female | 2016 | 0.2 | 0.2 | 0.2 | Republic of Korea |
| Female | 2017 | 0.2 | 0.1 | 0.2 | Republic of Korea |

|        |      |     |     |     |                   |
|--------|------|-----|-----|-----|-------------------|
| Female | 2018 | 0.2 | 0.1 | 0.2 | Republic of Korea |
| Female | 2019 | 0.2 | 0.2 | 0.2 | Republic of Korea |
| Female | 1980 | 0.4 | 0.2 | 0.7 | Latvia            |
| Female | 1981 | 0.5 | 0.2 | 0.7 | Latvia            |
| Female | 1982 | 0.4 | 0.2 | 0.6 | Latvia            |
| Female | 1983 | 0.5 | 0.3 | 0.8 | Latvia            |
| Female | 1984 | 0.5 | 0.3 | 0.7 | Latvia            |
| Female | 1985 | 0.6 | 0.4 | 0.9 | Latvia            |
| Female | 1986 | 0.4 | 0.2 | 0.6 | Latvia            |
| Female | 1987 | 0.5 | 0.2 | 0.7 | Latvia            |
| Female | 1988 | 0.5 | 0.3 | 0.8 | Latvia            |
| Female | 1989 | 0.9 | 0.6 | 1.3 | Latvia            |
| Female | 1990 | 0.5 | 0.3 | 0.8 | Latvia            |
| Female | 1991 | 0.6 | 0.4 | 0.9 | Latvia            |
| Female | 1992 | 0.7 | 0.4 | 1.0 | Latvia            |
| Female | 1993 | 0.5 | 0.3 | 0.8 | Latvia            |
| Female | 1994 | 0.6 | 0.3 | 0.8 | Latvia            |
| Female | 1995 | 0.3 | 0.1 | 0.5 | Latvia            |
| Female | 1996 | 0.2 | 0.1 | 0.3 | Latvia            |
| Female | 1997 | 0.3 | 0.1 | 0.5 | Latvia            |
| Female | 1998 | 0.7 | 0.4 | 1.1 | Latvia            |
| Female | 1999 | 0.4 | 0.2 | 0.7 | Latvia            |
| Female | 2000 | 0.3 | 0.1 | 0.4 | Latvia            |
| Female | 2001 | 0.4 | 0.2 | 0.6 | Latvia            |
| Female | 2002 | 0.5 | 0.3 | 0.8 | Latvia            |
| Female | 2003 | 0.3 | 0.1 | 0.5 | Latvia            |
| Female | 2004 | 0.4 | 0.2 | 0.6 | Latvia            |
| Female | 2005 | 0.5 | 0.2 | 0.7 | Latvia            |
| Female | 2006 | 0.6 | 0.3 | 0.9 | Latvia            |
| Female | 2007 | 0.7 | 0.4 | 1.0 | Latvia            |
| Female | 2008 | 0.4 | 0.2 | 0.6 | Latvia            |
| Female | 2009 | 0.6 | 0.3 | 0.9 | Latvia            |
| Female | 2010 | 0.6 | 0.3 | 0.9 | Latvia            |
| Female | 2011 | 0.5 | 0.3 | 0.7 | Latvia            |
| Female | 2012 | 0.4 | 0.2 | 0.6 | Latvia            |
| Female | 2013 | 0.7 | 0.3 | 1.0 | Latvia            |
| Female | 2014 | 0.5 | 0.3 | 0.8 | Latvia            |
| Female | 2015 | 0.8 | 0.5 | 1.2 | Latvia            |
| Female | 2016 | 1.1 | 0.7 | 1.5 | Latvia            |
| Female | 2017 | 1.0 | 0.6 | 1.3 | Latvia            |
| Female | 2018 | 0.9 | 0.5 | 1.2 | Latvia            |
| Female | 1979 | 1.2 | 1.0 | 1.3 | Netherlands       |
| Female | 1980 | 0.9 | 0.7 | 1.0 | Netherlands       |
| Female | 1981 | 1.1 | 1.0 | 1.3 | Netherlands       |
| Female | 1982 | 1.0 | 0.8 | 1.1 | Netherlands       |
| Female | 1983 | 1.1 | 0.9 | 1.2 | Netherlands       |

|        |      |     |     |     |             |
|--------|------|-----|-----|-----|-------------|
| Female | 1984 | 1.2 | 1.0 | 1.3 | Netherlands |
| Female | 1985 | 1.3 | 1.1 | 1.5 | Netherlands |
| Female | 1986 | 1.3 | 1.1 | 1.4 | Netherlands |
| Female | 1987 | 1.3 | 1.1 | 1.5 | Netherlands |
| Female | 1988 | 1.2 | 1.1 | 1.4 | Netherlands |
| Female | 1989 | 1.3 | 1.1 | 1.4 | Netherlands |
| Female | 1990 | 1.6 | 1.4 | 1.8 | Netherlands |
| Female | 1991 | 1.4 | 1.2 | 1.6 | Netherlands |
| Female | 1992 | 1.7 | 1.5 | 1.8 | Netherlands |
| Female | 1993 | 1.6 | 1.4 | 1.8 | Netherlands |
| Female | 1994 | 1.9 | 1.7 | 2.1 | Netherlands |
| Female | 1995 | 1.7 | 1.5 | 1.9 | Netherlands |
| Female | 1996 | 2.0 | 1.8 | 2.2 | Netherlands |
| Female | 1997 | 1.8 | 1.6 | 2.0 | Netherlands |
| Female | 1998 | 1.6 | 1.5 | 1.8 | Netherlands |
| Female | 1999 | 1.9 | 1.7 | 2.1 | Netherlands |
| Female | 2000 | 1.8 | 1.6 | 2.0 | Netherlands |
| Female | 2001 | 1.7 | 1.5 | 1.9 | Netherlands |
| Female | 2002 | 2.0 | 1.8 | 2.2 | Netherlands |
| Female | 2003 | 1.9 | 1.7 | 2.1 | Netherlands |
| Female | 2004 | 2.1 | 1.9 | 2.3 | Netherlands |
| Female | 2005 | 2.0 | 1.8 | 2.1 | Netherlands |
| Female | 2006 | 1.9 | 1.7 | 2.1 | Netherlands |
| Female | 2007 | 1.9 | 1.7 | 2.1 | Netherlands |
| Female | 2008 | 2.1 | 1.9 | 2.3 | Netherlands |
| Female | 2009 | 1.9 | 1.8 | 2.1 | Netherlands |
| Female | 2010 | 1.9 | 1.7 | 2.1 | Netherlands |
| Female | 2011 | 2.0 | 1.8 | 2.2 | Netherlands |
| Female | 2012 | 2.0 | 1.8 | 2.1 | Netherlands |
| Female | 2013 | 1.9 | 1.8 | 2.1 | Netherlands |
| Female | 2014 | 2.0 | 1.8 | 2.1 | Netherlands |
| Female | 2015 | 2.0 | 1.8 | 2.1 | Netherlands |
| Female | 2016 | 2.0 | 1.9 | 2.2 | Netherlands |
| Female | 2017 | 2.0 | 1.9 | 2.2 | Netherlands |
| Female | 2018 | 2.0 | 1.9 | 2.2 | Netherlands |
| Female | 1979 | 1.9 | 1.5 | 2.4 | New Zealand |
| Female | 1980 | 1.5 | 1.0 | 1.9 | New Zealand |
| Female | 1981 | 1.6 | 1.1 | 2.1 | New Zealand |
| Female | 1982 | 1.8 | 1.3 | 2.3 | New Zealand |
| Female | 1983 | 2.0 | 1.5 | 2.6 | New Zealand |
| Female | 1984 | 1.7 | 1.2 | 2.2 | New Zealand |
| Female | 1985 | 1.7 | 1.3 | 2.2 | New Zealand |
| Female | 1986 | 1.4 | 1.0 | 1.7 | New Zealand |
| Female | 1987 | 1.7 | 1.2 | 2.1 | New Zealand |
| Female | 1988 | 2.0 | 1.6 | 2.5 | New Zealand |
| Female | 1989 | 1.4 | 1.1 | 1.8 | New Zealand |



|        |      |     |     |     |             |
|--------|------|-----|-----|-----|-------------|
| Female | 1990 | 2.0 | 1.5 | 2.5 | New Zealand |
| Female | 1991 | 1.8 | 1.3 | 2.2 | New Zealand |
| Female | 1992 | 1.8 | 1.4 | 2.2 | New Zealand |
| Female | 1993 | 1.8 | 1.4 | 2.2 | New Zealand |
| Female | 1994 | 1.6 | 1.2 | 2.0 | New Zealand |
| Female | 1995 | 1.7 | 1.3 | 2.1 | New Zealand |
| Female | 1996 | 1.9 | 1.5 | 2.4 | New Zealand |
| Female | 1997 | 1.4 | 1.1 | 1.8 | New Zealand |
| Female | 1998 | 1.0 | 0.8 | 1.3 | New Zealand |
| Female | 1999 | 1.4 | 1.0 | 1.7 | New Zealand |
| Female | 2000 | 1.1 | 0.8 | 1.4 | New Zealand |
| Female | 2001 | 1.4 | 1.1 | 1.7 | New Zealand |
| Female | 2002 | 1.3 | 1.0 | 1.7 | New Zealand |
| Female | 2003 | 1.6 | 1.2 | 1.9 | New Zealand |
| Female | 2004 | 1.6 | 1.2 | 1.9 | New Zealand |
| Female | 2005 | 1.3 | 1.0 | 1.6 | New Zealand |
| Female | 2006 | 1.5 | 1.2 | 1.8 | New Zealand |
| Female | 2007 | 1.2 | 0.9 | 1.5 | New Zealand |
| Female | 2008 | 1.3 | 1.0 | 1.6 | New Zealand |
| Female | 2009 | 1.3 | 1.0 | 1.6 | New Zealand |
| Female | 2010 | 1.6 | 1.2 | 1.9 | New Zealand |
| Female | 2011 | 1.7 | 1.3 | 2.1 | New Zealand |
| Female | 2012 | 1.1 | 0.9 | 1.4 | New Zealand |
| Female | 2013 | 1.3 | 1.0 | 1.6 | New Zealand |
| Female | 2014 | 1.2 | 0.9 | 1.5 | New Zealand |
| Female | 2015 | 1.1 | 0.9 | 1.4 | New Zealand |
| Female | 2016 | 1.0 | 0.8 | 1.2 | New Zealand |
| Female | 1992 | 0.6 | 0.5 | 0.7 | Philippines |
| Female | 1993 | 0.5 | 0.4 | 0.6 | Philippines |
| Female | 1994 | 0.6 | 0.5 | 0.7 | Philippines |
| Female | 1995 | 0.7 | 0.6 | 0.8 | Philippines |
| Female | 1996 | 0.6 | 0.5 | 0.7 | Philippines |
| Female | 1997 | 0.5 | 0.4 | 0.5 | Philippines |
| Female | 1998 | 0.6 | 0.5 | 0.7 | Philippines |
| Female | 1999 | 0.4 | 0.3 | 0.5 | Philippines |
| Female | 2000 | 0.5 | 0.4 | 0.6 | Philippines |
| Female | 2001 | 0.5 | 0.4 | 0.6 | Philippines |
| Female | 2002 | 0.5 | 0.4 | 0.6 | Philippines |
| Female | 2003 | 0.4 | 0.3 | 0.5 | Philippines |
| Female | 2006 | 0.4 | 0.3 | 0.5 | Philippines |
| Female | 2007 | 0.4 | 0.3 | 0.5 | Philippines |
| Female | 2008 | 0.4 | 0.3 | 0.4 | Philippines |
| Female | 2009 | 0.3 | 0.3 | 0.4 | Philippines |
| Female | 2010 | 0.4 | 0.3 | 0.4 | Philippines |
| Female | 2011 | 0.2 | 0.2 | 0.3 | Philippines |
| Female | 2014 | 0.4 | 0.3 | 0.5 | Philippines |

|        |      |     |     |     |          |
|--------|------|-----|-----|-----|----------|
| Female | 1980 | 0.8 | 0.7 | 0.9 | Poland   |
| Female | 1981 | 0.8 | 0.7 | 0.9 | Poland   |
| Female | 1982 | 0.7 | 0.6 | 0.8 | Poland   |
| Female | 1983 | 0.7 | 0.6 | 0.8 | Poland   |
| Female | 1984 | 0.8 | 0.7 | 0.9 | Poland   |
| Female | 1985 | 0.7 | 0.6 | 0.7 | Poland   |
| Female | 1986 | 0.7 | 0.6 | 0.8 | Poland   |
| Female | 1987 | 0.7 | 0.6 | 0.8 | Poland   |
| Female | 1988 | 0.8 | 0.7 | 0.9 | Poland   |
| Female | 1989 | 0.7 | 0.6 | 0.7 | Poland   |
| Female | 1990 | 0.8 | 0.7 | 0.8 | Poland   |
| Female | 1991 | 0.6 | 0.5 | 0.7 | Poland   |
| Female | 1992 | 0.7 | 0.6 | 0.7 | Poland   |
| Female | 1993 | 0.8 | 0.7 | 0.9 | Poland   |
| Female | 1994 | 0.7 | 0.7 | 0.8 | Poland   |
| Female | 1995 | 0.8 | 0.7 | 0.9 | Poland   |
| Female | 1996 | 0.6 | 0.6 | 0.7 | Poland   |
| Female | 1999 | 0.6 | 0.5 | 0.7 | Poland   |
| Female | 2000 | 0.7 | 0.6 | 0.8 | Poland   |
| Female | 2001 | 0.7 | 0.6 | 0.8 | Poland   |
| Female | 2002 | 0.7 | 0.6 | 0.7 | Poland   |
| Female | 2003 | 0.7 | 0.6 | 0.7 | Poland   |
| Female | 2004 | 0.7 | 0.6 | 0.7 | Poland   |
| Female | 2005 | 0.7 | 0.6 | 0.8 | Poland   |
| Female | 2006 | 0.7 | 0.6 | 0.7 | Poland   |
| Female | 2007 | 0.8 | 0.7 | 0.8 | Poland   |
| Female | 2008 | 0.7 | 0.6 | 0.7 | Poland   |
| Female | 2009 | 0.7 | 0.6 | 0.7 | Poland   |
| Female | 2010 | 0.6 | 0.5 | 0.7 | Poland   |
| Female | 2011 | 0.6 | 0.5 | 0.7 | Poland   |
| Female | 2012 | 0.7 | 0.6 | 0.8 | Poland   |
| Female | 2013 | 0.7 | 0.6 | 0.8 | Poland   |
| Female | 2014 | 0.8 | 0.7 | 0.8 | Poland   |
| Female | 2015 | 0.7 | 0.6 | 0.7 | Poland   |
| Female | 2016 | 0.7 | 0.6 | 0.8 | Poland   |
| Female | 2017 | 0.6 | 0.6 | 0.7 | Poland   |
| Female | 2018 | 0.7 | 0.6 | 0.8 | Poland   |
| Female | 1980 | 1.3 | 1.1 | 1.6 | Portugal |
| Female | 1981 | 1.5 | 1.2 | 1.7 | Portugal |
| Female | 1982 | 1.4 | 1.2 | 1.6 | Portugal |
| Female | 1983 | 1.3 | 1.1 | 1.5 | Portugal |
| Female | 1984 | 1.4 | 1.2 | 1.6 | Portugal |
| Female | 1985 | 1.2 | 1.0 | 1.4 | Portugal |
| Female | 1986 | 1.3 | 1.1 | 1.6 | Portugal |
| Female | 1987 | 1.1 | 0.9 | 1.3 | Portugal |
| Female | 1988 | 1.0 | 0.9 | 1.2 | Portugal |

|        |      |     |     |     |                    |
|--------|------|-----|-----|-----|--------------------|
| Female | 1989 | 0.9 | 0.8 | 1.1 | Portugal           |
| Female | 1990 | 1.1 | 0.9 | 1.3 | Portugal           |
| Female | 1991 | 0.7 | 0.5 | 0.8 | Portugal           |
| Female | 1992 | 0.9 | 0.8 | 1.1 | Portugal           |
| Female | 1993 | 0.8 | 0.6 | 0.9 | Portugal           |
| Female | 1994 | 0.8 | 0.7 | 1.0 | Portugal           |
| Female | 1995 | 0.6 | 0.5 | 0.7 | Portugal           |
| Female | 1996 | 0.8 | 0.7 | 1.0 | Portugal           |
| Female | 1997 | 0.6 | 0.4 | 0.7 | Portugal           |
| Female | 1998 | 0.8 | 0.6 | 0.9 | Portugal           |
| Female | 1999 | 0.8 | 0.6 | 0.9 | Portugal           |
| Female | 2000 | 0.6 | 0.5 | 0.7 | Portugal           |
| Female | 2001 | 0.7 | 0.6 | 0.9 | Portugal           |
| Female | 2002 | 0.5 | 0.4 | 0.6 | Portugal           |
| Female | 2003 | 0.6 | 0.5 | 0.8 | Portugal           |
| Female | 2007 | 0.3 | 0.2 | 0.4 | Portugal           |
| Female | 2008 | 0.6 | 0.4 | 0.7 | Portugal           |
| Female | 2009 | 0.4 | 0.3 | 0.5 | Portugal           |
| Female | 2010 | 0.4 | 0.4 | 0.5 | Portugal           |
| Female | 2011 | 0.4 | 0.3 | 0.5 | Portugal           |
| Female | 2012 | 0.5 | 0.4 | 0.6 | Portugal           |
| Female | 2013 | 0.3 | 0.2 | 0.3 | Portugal           |
| Female | 2014 | 0.4 | 0.3 | 0.5 | Portugal           |
| Female | 2015 | 0.3 | 0.3 | 0.4 | Portugal           |
| Female | 2016 | 0.3 | 0.3 | 0.4 | Portugal           |
| Female | 2017 | 0.5 | 0.4 | 0.6 | Portugal           |
| Female | 2018 | 0.3 | 0.2 | 0.4 | Portugal           |
| Female | 1980 | 2.3 | 2.2 | 2.3 | Russian Federation |
| Female | 1981 | 1.9 | 1.8 | 2.0 | Russian Federation |
| Female | 1982 | 2.0 | 1.9 | 2.0 | Russian Federation |
| Female | 1983 | 1.9 | 1.8 | 2.0 | Russian Federation |
| Female | 1984 | 1.8 | 1.7 | 1.9 | Russian Federation |
| Female | 1985 | 1.7 | 1.6 | 1.8 | Russian Federation |
| Female | 1986 | 1.7 | 1.6 | 1.7 | Russian Federation |
| Female | 1987 | 1.7 | 1.7 | 1.8 | Russian Federation |
| Female | 1988 | 1.7 | 1.6 | 1.7 | Russian Federation |
| Female | 1989 | 1.6 | 1.6 | 1.7 | Russian Federation |
| Female | 1990 | 1.6 | 1.5 | 1.6 | Russian Federation |
| Female | 1991 | 1.5 | 1.4 | 1.5 | Russian Federation |
| Female | 1992 | 1.5 | 1.4 | 1.5 | Russian Federation |
| Female | 1993 | 1.4 | 1.4 | 1.5 | Russian Federation |
| Female | 1994 | 1.3 | 1.3 | 1.4 | Russian Federation |
| Female | 1995 | 1.2 | 1.2 | 1.3 | Russian Federation |
| Female | 1996 | 1.1 | 1.1 | 1.2 | Russian Federation |
| Female | 1997 | 1.1 | 1.1 | 1.2 | Russian Federation |
| Female | 1998 | 1.1 | 1.0 | 1.1 | Russian Federation |

|        |      |     |     |     |                    |
|--------|------|-----|-----|-----|--------------------|
| Female | 1999 | 1.1 | 1.0 | 1.1 | Russian Federation |
| Female | 2000 | 1.0 | 0.9 | 1.0 | Russian Federation |
| Female | 2001 | 1.0 | 0.9 | 1.0 | Russian Federation |
| Female | 2002 | 0.9 | 0.9 | 0.9 | Russian Federation |
| Female | 2003 | 0.9 | 0.9 | 0.9 | Russian Federation |
| Female | 2004 | 0.9 | 0.9 | 1.0 | Russian Federation |
| Female | 2005 | 0.8 | 0.8 | 0.9 | Russian Federation |
| Female | 2006 | 0.8 | 0.7 | 0.8 | Russian Federation |
| Female | 2007 | 0.8 | 0.7 | 0.8 | Russian Federation |
| Female | 2008 | 0.7 | 0.7 | 0.7 | Russian Federation |
| Female | 2009 | 0.8 | 0.7 | 0.8 | Russian Federation |
| Female | 2010 | 0.7 | 0.7 | 0.8 | Russian Federation |
| Female | 2011 | 0.8 | 0.7 | 0.8 | Russian Federation |
| Female | 2012 | 0.7 | 0.7 | 0.8 | Russian Federation |
| Female | 2013 | 0.7 | 0.6 | 0.7 | Russian Federation |
| Female | 2014 | 0.7 | 0.7 | 0.8 | Russian Federation |
| Female | 2015 | 0.7 | 0.7 | 0.8 | Russian Federation |
| Female | 2016 | 0.7 | 0.7 | 0.7 | Russian Federation |
| Female | 2017 | 0.7 | 0.7 | 0.8 | Russian Federation |
| Female | 2018 | 0.8 | 0.7 | 0.8 | Russian Federation |
| Female | 2019 | 0.8 | 0.8 | 0.8 | Russian Federation |
| Female | 1979 | 3.8 | 2.5 | 5.0 | Singapore          |
| Female | 1980 | 3.7 | 2.5 | 4.9 | Singapore          |
| Female | 1981 | 2.2 | 1.3 | 3.1 | Singapore          |
| Female | 1982 | 2.0 | 1.1 | 2.8 | Singapore          |
| Female | 1983 | 2.5 | 1.5 | 3.4 | Singapore          |
| Female | 1984 | 2.6 | 1.7 | 3.5 | Singapore          |
| Female | 1985 | 1.8 | 1.1 | 2.5 | Singapore          |
| Female | 1986 | 1.8 | 1.2 | 2.5 | Singapore          |
| Female | 1987 | 1.6 | 1.0 | 2.3 | Singapore          |
| Female | 1988 | 0.8 | 0.3 | 1.2 | Singapore          |
| Female | 1989 | 1.4 | 0.8 | 2.0 | Singapore          |
| Female | 1990 | 1.4 | 0.9 | 2.0 | Singapore          |
| Female | 1991 | 1.9 | 1.3 | 2.6 | Singapore          |
| Female | 1992 | 2.2 | 1.5 | 2.9 | Singapore          |
| Female | 1993 | 1.4 | 0.9 | 1.9 | Singapore          |
| Female | 1994 | 1.5 | 0.9 | 2.1 | Singapore          |
| Female | 1995 | 0.8 | 0.4 | 1.2 | Singapore          |
| Female | 1996 | 1.0 | 0.6 | 1.4 | Singapore          |
| Female | 1997 | 1.4 | 0.9 | 1.9 | Singapore          |
| Female | 1998 | 0.8 | 0.5 | 1.1 | Singapore          |
| Female | 1999 | 0.7 | 0.4 | 1.0 | Singapore          |
| Female | 2000 | 0.8 | 0.5 | 1.1 | Singapore          |
| Female | 2001 | 0.6 | 0.3 | 0.9 | Singapore          |
| Female | 2002 | 0.7 | 0.4 | 1.0 | Singapore          |
| Female | 2003 | 0.3 | 0.1 | 0.4 | Singapore          |

|        |      |     |     |     |           |
|--------|------|-----|-----|-----|-----------|
| Female | 2004 | 0.5 | 0.3 | 0.8 | Singapore |
| Female | 2005 | 0.4 | 0.2 | 0.5 | Singapore |
| Female | 2006 | 0.4 | 0.2 | 0.5 | Singapore |
| Female | 2007 | 0.3 | 0.1 | 0.4 | Singapore |
| Female | 2008 | 0.5 | 0.3 | 0.6 | Singapore |
| Female | 2009 | 0.4 | 0.2 | 0.5 | Singapore |
| Female | 2010 | 0.4 | 0.2 | 0.5 | Singapore |
| Female | 2011 | 0.4 | 0.2 | 0.5 | Singapore |
| Female | 2012 | 0.3 | 0.2 | 0.5 | Singapore |
| Female | 2013 | 0.3 | 0.2 | 0.4 | Singapore |
| Female | 2014 | 0.3 | 0.2 | 0.5 | Singapore |
| Female | 2015 | 0.5 | 0.3 | 0.7 | Singapore |
| Female | 2016 | 0.3 | 0.1 | 0.4 | Singapore |
| Female | 2017 | 0.2 | 0.1 | 0.3 | Singapore |
| Female | 2019 | 0.1 | 0.1 | 0.2 | Singapore |
| Female | 1985 | 0.5 | 0.2 | 0.9 | Slovenia  |
| Female | 1986 | 0.3 | 0.1 | 0.5 | Slovenia  |
| Female | 1987 | 0.5 | 0.3 | 0.8 | Slovenia  |
| Female | 1988 | 0.7 | 0.3 | 1.1 | Slovenia  |
| Female | 1989 | 0.4 | 0.2 | 0.6 | Slovenia  |
| Female | 1990 | 0.9 | 0.5 | 1.4 | Slovenia  |
| Female | 1991 | 1.0 | 0.5 | 1.4 | Slovenia  |
| Female | 1992 | 0.7 | 0.4 | 1.0 | Slovenia  |
| Female | 1993 | 0.5 | 0.2 | 0.7 | Slovenia  |
| Female | 1994 | 0.4 | 0.2 | 0.6 | Slovenia  |
| Female | 1995 | 0.6 | 0.3 | 1.0 | Slovenia  |
| Female | 1996 | 0.7 | 0.3 | 1.0 | Slovenia  |
| Female | 1997 | 0.2 | 0.1 | 0.4 | Slovenia  |
| Female | 1998 | 0.8 | 0.4 | 1.2 | Slovenia  |
| Female | 1999 | 0.9 | 0.5 | 1.3 | Slovenia  |
| Female | 2000 | 0.5 | 0.2 | 0.8 | Slovenia  |
| Female | 2001 | 0.7 | 0.4 | 1.0 | Slovenia  |
| Female | 2002 | 0.7 | 0.4 | 1.0 | Slovenia  |
| Female | 2003 | 0.5 | 0.2 | 0.7 | Slovenia  |
| Female | 2004 | 0.6 | 0.3 | 0.9 | Slovenia  |
| Female | 2005 | 0.5 | 0.2 | 0.7 | Slovenia  |
| Female | 2006 | 0.7 | 0.3 | 1.1 | Slovenia  |
| Female | 2007 | 0.5 | 0.2 | 0.7 | Slovenia  |
| Female | 2008 | 0.6 | 0.3 | 0.9 | Slovenia  |
| Female | 2009 | 0.5 | 0.2 | 0.7 | Slovenia  |
| Female | 2010 | 0.3 | 0.1 | 0.5 | Slovenia  |
| Female | 2011 | 0.5 | 0.3 | 0.8 | Slovenia  |
| Female | 2012 | 0.6 | 0.3 | 0.9 | Slovenia  |
| Female | 2013 | 0.7 | 0.4 | 1.0 | Slovenia  |
| Female | 2014 | 0.6 | 0.3 | 0.9 | Slovenia  |
| Female | 2015 | 0.6 | 0.3 | 0.9 | Slovenia  |

|        |      |     |     |     |             |
|--------|------|-----|-----|-----|-------------|
| Female | 2016 | 0.6 | 0.4 | 0.9 | Slovenia    |
| Female | 2017 | 0.7 | 0.4 | 0.9 | Slovenia    |
| Female | 2018 | 0.4 | 0.2 | 0.5 | Slovenia    |
| Female | 2019 | 0.7 | 0.4 | 1.0 | Slovenia    |
| Female | 1980 | 0.7 | 0.6 | 0.8 | Spain       |
| Female | 1981 | 0.7 | 0.6 | 0.7 | Spain       |
| Female | 1982 | 0.7 | 0.6 | 0.8 | Spain       |
| Female | 1983 | 0.6 | 0.5 | 0.7 | Spain       |
| Female | 1984 | 0.7 | 0.6 | 0.8 | Spain       |
| Female | 1985 | 0.6 | 0.5 | 0.6 | Spain       |
| Female | 1986 | 0.6 | 0.5 | 0.7 | Spain       |
| Female | 1987 | 0.5 | 0.5 | 0.6 | Spain       |
| Female | 1988 | 0.5 | 0.4 | 0.6 | Spain       |
| Female | 1989 | 0.5 | 0.5 | 0.6 | Spain       |
| Female | 1990 | 0.5 | 0.5 | 0.6 | Spain       |
| Female | 1991 | 0.4 | 0.4 | 0.5 | Spain       |
| Female | 1992 | 0.4 | 0.4 | 0.5 | Spain       |
| Female | 1993 | 0.5 | 0.5 | 0.6 | Spain       |
| Female | 1994 | 0.4 | 0.3 | 0.4 | Spain       |
| Female | 1995 | 0.4 | 0.3 | 0.4 | Spain       |
| Female | 1996 | 0.4 | 0.4 | 0.5 | Spain       |
| Female | 1997 | 0.4 | 0.4 | 0.5 | Spain       |
| Female | 1998 | 0.5 | 0.4 | 0.5 | Spain       |
| Female | 1999 | 0.4 | 0.4 | 0.5 | Spain       |
| Female | 2000 | 0.4 | 0.3 | 0.5 | Spain       |
| Female | 2001 | 0.4 | 0.4 | 0.5 | Spain       |
| Female | 2002 | 0.4 | 0.4 | 0.5 | Spain       |
| Female | 2003 | 0.4 | 0.4 | 0.5 | Spain       |
| Female | 2004 | 0.4 | 0.3 | 0.4 | Spain       |
| Female | 2005 | 0.4 | 0.4 | 0.5 | Spain       |
| Female | 2006 | 0.5 | 0.4 | 0.5 | Spain       |
| Female | 2007 | 0.4 | 0.4 | 0.5 | Spain       |
| Female | 2008 | 0.4 | 0.3 | 0.5 | Spain       |
| Female | 2009 | 0.5 | 0.4 | 0.5 | Spain       |
| Female | 2010 | 0.5 | 0.4 | 0.5 | Spain       |
| Female | 2011 | 0.5 | 0.4 | 0.5 | Spain       |
| Female | 2012 | 0.3 | 0.3 | 0.4 | Spain       |
| Female | 2013 | 0.5 | 0.4 | 0.5 | Spain       |
| Female | 2014 | 0.5 | 0.4 | 0.5 | Spain       |
| Female | 2015 | 0.5 | 0.4 | 0.5 | Spain       |
| Female | 2016 | 0.4 | 0.4 | 0.5 | Spain       |
| Female | 2017 | 0.5 | 0.5 | 0.6 | Spain       |
| Female | 1995 | 1.0 | 0.8 | 1.2 | Switzerland |
| Female | 1996 | 0.9 | 0.7 | 1.1 | Switzerland |
| Female | 1997 | 1.0 | 0.8 | 1.2 | Switzerland |
| Female | 1998 | 1.1 | 0.9 | 1.3 | Switzerland |

|        |      |     |     |     |             |
|--------|------|-----|-----|-----|-------------|
| Female | 1999 | 0.9 | 0.7 | 1.1 | Switzerland |
| Female | 2000 | 0.9 | 0.8 | 1.1 | Switzerland |
| Female | 2001 | 1.1 | 0.9 | 1.4 | Switzerland |
| Female | 2002 | 1.0 | 0.8 | 1.2 | Switzerland |
| Female | 2003 | 0.9 | 0.7 | 1.1 | Switzerland |
| Female | 2004 | 0.7 | 0.6 | 0.9 | Switzerland |
| Female | 2005 | 1.1 | 0.9 | 1.3 | Switzerland |
| Female | 2006 | 1.1 | 0.8 | 1.3 | Switzerland |
| Female | 2007 | 1.2 | 1.0 | 1.5 | Switzerland |
| Female | 2008 | 1.0 | 0.8 | 1.2 | Switzerland |
| Female | 2009 | 0.9 | 0.7 | 1.1 | Switzerland |
| Female | 2010 | 0.9 | 0.7 | 1.1 | Switzerland |
| Female | 2011 | 0.9 | 0.7 | 1.0 | Switzerland |
| Female | 2012 | 1.0 | 0.8 | 1.1 | Switzerland |
| Female | 2013 | 1.1 | 0.9 | 1.3 | Switzerland |
| Female | 2014 | 1.0 | 0.8 | 1.2 | Switzerland |
| Female | 2015 | 0.9 | 0.7 | 1.1 | Switzerland |
| Female | 2016 | 0.7 | 0.5 | 0.8 | Switzerland |
| Female | 2017 | 0.8 | 0.6 | 0.9 | Switzerland |
| Female | 1979 | 0.3 | 0.2 | 0.4 | Thailand    |
| Female | 1980 | 0.4 | 0.3 | 0.5 | Thailand    |
| Female | 1981 | 0.2 | 0.1 | 0.3 | Thailand    |
| Female | 1982 | 0.4 | 0.3 | 0.5 | Thailand    |
| Female | 1983 | 0.2 | 0.2 | 0.3 | Thailand    |
| Female | 1984 | 0.3 | 0.2 | 0.3 | Thailand    |
| Female | 1985 | 0.2 | 0.1 | 0.2 | Thailand    |
| Female | 1986 | 0.2 | 0.1 | 0.2 | Thailand    |
| Female | 1987 | 0.2 | 0.1 | 0.3 | Thailand    |
| Female | 1990 | 0.2 | 0.2 | 0.3 | Thailand    |
| Female | 1991 | 0.3 | 0.2 | 0.4 | Thailand    |
| Female | 1992 | 0.2 | 0.2 | 0.3 | Thailand    |
| Female | 1994 | 0.1 | 0.1 | 0.2 | Thailand    |
| Female | 1995 | 0.2 | 0.2 | 0.3 | Thailand    |
| Female | 1996 | 0.2 | 0.1 | 0.2 | Thailand    |
| Female | 1997 | 0.1 | 0.1 | 0.2 | Thailand    |
| Female | 1998 | 0.1 | 0.1 | 0.1 | Thailand    |
| Female | 1999 | 0.2 | 0.1 | 0.2 | Thailand    |
| Female | 2000 | 0.2 | 0.1 | 0.2 | Thailand    |
| Female | 2002 | 0.4 | 0.3 | 0.4 | Thailand    |
| Female | 2003 | 0.6 | 0.5 | 0.6 | Thailand    |
| Female | 2004 | 0.4 | 0.3 | 0.4 | Thailand    |
| Female | 2005 | 0.3 | 0.3 | 0.4 | Thailand    |
| Female | 2006 | 0.3 | 0.3 | 0.4 | Thailand    |
| Female | 2007 | 0.4 | 0.3 | 0.4 | Thailand    |
| Female | 2008 | 0.3 | 0.3 | 0.4 | Thailand    |
| Female | 2009 | 0.3 | 0.3 | 0.4 | Thailand    |

|        |      |     |     |     |                |
|--------|------|-----|-----|-----|----------------|
| Female | 2010 | 0.4 | 0.3 | 0.4 | Thailand       |
| Female | 2011 | 0.4 | 0.3 | 0.4 | Thailand       |
| Female | 2012 | 0.4 | 0.3 | 0.4 | Thailand       |
| Female | 2013 | 0.4 | 0.3 | 0.4 | Thailand       |
| Female | 2014 | 0.4 | 0.3 | 0.4 | Thailand       |
| Female | 2015 | 0.4 | 0.3 | 0.4 | Thailand       |
| Female | 2016 | 0.3 | 0.3 | 0.4 | Thailand       |
| Female | 2017 | 0.4 | 0.3 | 0.4 | Thailand       |
| Female | 2018 | 0.4 | 0.3 | 0.4 | Thailand       |
| Female | 2019 | 0.3 | 0.3 | 0.4 | Thailand       |
| Female | 2009 | 0.7 | 0.6 | 0.7 | Turkey         |
| Female | 2010 | 0.6 | 0.6 | 0.7 | Turkey         |
| Female | 2011 | 0.7 | 0.7 | 0.8 | Turkey         |
| Female | 2012 | 0.6 | 0.5 | 0.6 | Turkey         |
| Female | 2013 | 0.6 | 0.6 | 0.7 | Turkey         |
| Female | 2014 | 0.7 | 0.6 | 0.7 | Turkey         |
| Female | 2015 | 0.6 | 0.6 | 0.7 | Turkey         |
| Female | 2016 | 0.7 | 0.6 | 0.7 | Turkey         |
| Female | 2019 | 0.5 | 0.4 | 0.5 | Turkey         |
| Female | 1979 | 2.5 | 2.4 | 2.6 | United Kingdom |
| Female | 1980 | 2.6 | 2.5 | 2.7 | United Kingdom |
| Female | 1981 | 2.6 | 2.4 | 2.7 | United Kingdom |
| Female | 1982 | 2.7 | 2.6 | 2.8 | United Kingdom |
| Female | 1983 | 2.7 | 2.6 | 2.8 | United Kingdom |
| Female | 1984 | 2.9 | 2.7 | 3.0 | United Kingdom |
| Female | 1985 | 2.7 | 2.6 | 2.9 | United Kingdom |
| Female | 1986 | 2.8 | 2.7 | 2.9 | United Kingdom |
| Female | 1987 | 2.8 | 2.7 | 2.9 | United Kingdom |
| Female | 1988 | 2.7 | 2.6 | 2.8 | United Kingdom |
| Female | 1989 | 2.9 | 2.8 | 3.0 | United Kingdom |
| Female | 1990 | 3.0 | 2.9 | 3.1 | United Kingdom |
| Female | 1991 | 2.9 | 2.8 | 3.1 | United Kingdom |
| Female | 1992 | 3.0 | 2.9 | 3.1 | United Kingdom |
| Female | 1993 | 3.0 | 2.9 | 3.2 | United Kingdom |
| Female | 1994 | 3.0 | 2.9 | 3.1 | United Kingdom |
| Female | 1995 | 3.1 | 3.0 | 3.2 | United Kingdom |
| Female | 1996 | 3.0 | 2.9 | 3.1 | United Kingdom |
| Female | 1997 | 3.0 | 2.9 | 3.1 | United Kingdom |
| Female | 1998 | 2.8 | 2.6 | 2.9 | United Kingdom |
| Female | 1999 | 3.0 | 2.9 | 3.2 | United Kingdom |
| Female | 2001 | 2.8 | 2.7 | 2.9 | United Kingdom |
| Female | 2002 | 2.9 | 2.8 | 3.0 | United Kingdom |
| Female | 2003 | 2.8 | 2.7 | 2.9 | United Kingdom |
| Female | 2004 | 2.8 | 2.6 | 2.9 | United Kingdom |
| Female | 2005 | 2.7 | 2.6 | 2.8 | United Kingdom |
| Female | 2006 | 2.7 | 2.6 | 2.8 | United Kingdom |



|        |      |     |     |     |                |
|--------|------|-----|-----|-----|----------------|
| Female | 2007 | 2.7 | 2.6 | 2.8 | United Kingdom |
| Female | 2008 | 2.7 | 2.6 | 2.8 | United Kingdom |
| Female | 2009 | 2.5 | 2.4 | 2.6 | United Kingdom |
| Female | 2010 | 2.4 | 2.3 | 2.5 | United Kingdom |
| Female | 2011 | 2.3 | 2.3 | 2.4 | United Kingdom |
| Female | 2012 | 2.4 | 2.3 | 2.5 | United Kingdom |
| Female | 2013 | 2.4 | 2.3 | 2.5 | United Kingdom |
| Female | 2014 | 2.4 | 2.3 | 2.5 | United Kingdom |
| Female | 2015 | 2.3 | 2.2 | 2.4 | United Kingdom |
| Female | 2016 | 2.3 | 2.2 | 2.4 | United Kingdom |
| Female | 1970 | 1.5 | 1.1 | 1.9 | Denmark        |
| Female | 1971 | 1.2 | 0.9 | 1.5 | Denmark        |
| Female | 1972 | 1.0 | 0.7 | 1.3 | Denmark        |
| Female | 1973 | 1.0 | 0.7 | 1.3 | Denmark        |
| Female | 1974 | 0.9 | 0.6 | 1.1 | Denmark        |
| Female | 1975 | 1.3 | 1.0 | 1.6 | Denmark        |
| Female | 1976 | 1.1 | 0.8 | 1.4 | Denmark        |
| Female | 1977 | 1.1 | 0.8 | 1.4 | Denmark        |
| Female | 1978 | 1.3 | 1.0 | 1.6 | Denmark        |
| Female | 1979 | 1.0 | 0.7 | 1.2 | Denmark        |
| Female | 1980 | 1.4 | 1.1 | 1.7 | Denmark        |
| Female | 1981 | 1.0 | 0.8 | 1.2 | Denmark        |
| Female | 1982 | 1.3 | 1.0 | 1.6 | Denmark        |
| Female | 1983 | 1.5 | 1.2 | 1.8 | Denmark        |
| Female | 1984 | 1.1 | 0.8 | 1.4 | Denmark        |
| Female | 1985 | 1.2 | 0.9 | 1.5 | Denmark        |
| Female | 1986 | 1.4 | 1.1 | 1.7 | Denmark        |
| Female | 1987 | 1.4 | 1.1 | 1.7 | Denmark        |
| Female | 1988 | 1.4 | 1.1 | 1.7 | Denmark        |
| Female | 1989 | 1.3 | 1.0 | 1.6 | Denmark        |
| Female | 1990 | 1.4 | 1.1 | 1.7 | Denmark        |
| Female | 1991 | 1.1 | 0.9 | 1.3 | Denmark        |
| Female | 1992 | 1.6 | 1.3 | 1.9 | Denmark        |
| Female | 1993 | 1.4 | 1.1 | 1.7 | Denmark        |
| Female | 1994 | 1.6 | 1.3 | 1.9 | Denmark        |
| Female | 1995 | 1.9 | 1.5 | 2.3 | Denmark        |
| Female | 1996 | 1.7 | 1.4 | 2.0 | Denmark        |
| Female | 1997 | 1.8 | 1.5 | 2.1 | Denmark        |
| Female | 1998 | 1.6 | 1.3 | 1.9 | Denmark        |
| Female | 1999 | 1.7 | 1.4 | 2.0 | Denmark        |
| Female | 2000 | 2.3 | 1.9 | 2.7 | Denmark        |
| Female | 2001 | 1.8 | 1.5 | 2.1 | Denmark        |
| Female | 2002 | 2.0 | 1.6 | 2.4 | Denmark        |
| Female | 2003 | 1.6 | 1.3 | 1.9 | Denmark        |
| Female | 2004 | 1.9 | 1.6 | 2.2 | Denmark        |
| Female | 2005 | 1.9 | 1.5 | 2.3 | Denmark        |

|        |      |     |     |     |         |
|--------|------|-----|-----|-----|---------|
| Female | 2006 | 2.0 | 1.6 | 2.4 | Denmark |
| Female | 2007 | 1.8 | 1.5 | 2.1 | Denmark |
| Female | 2008 | 1.7 | 1.4 | 2.0 | Denmark |
| Female | 2009 | 1.2 | 0.9 | 1.5 | Denmark |
| Female | 2010 | 1.4 | 1.1 | 1.7 | Denmark |
| Female | 2011 | 1.5 | 1.2 | 1.8 | Denmark |
| Female | 2012 | 1.9 | 1.6 | 2.2 | Denmark |
| Female | 2013 | 1.5 | 1.2 | 1.8 | Denmark |
| Female | 2014 | 1.5 | 1.2 | 1.8 | Denmark |
| Female | 2015 | 1.3 | 1.0 | 1.6 | Denmark |
| Female | 2016 | 1.7 | 1.4 | 2.0 | Denmark |
| Female | 2017 | 1.1 | 0.9 | 1.3 | Denmark |
| Female | 2018 | 1.6 | 1.3 | 1.9 | Denmark |
| Female | 2019 | 1.9 | 1.6 | 2.2 | Denmark |
| Male   | 1970 | 3.3 | 2.7 | 3.9 | Denmark |
| Male   | 1971 | 2.7 | 2.2 | 3.2 | Denmark |
| Male   | 1972 | 2.4 | 1.9 | 2.9 | Denmark |
| Male   | 1973 | 3.1 | 2.5 | 3.7 | Denmark |
| Male   | 1974 | 3.3 | 2.7 | 3.9 | Denmark |
| Male   | 1975 | 3.0 | 2.5 | 3.5 | Denmark |
| Male   | 1976 | 3.0 | 2.5 | 3.5 | Denmark |
| Male   | 1977 | 3.4 | 2.8 | 4.0 | Denmark |
| Male   | 1978 | 2.7 | 2.2 | 3.2 | Denmark |
| Male   | 1979 | 3.6 | 3.0 | 4.2 | Denmark |
| Male   | 1980 | 3.6 | 3.0 | 4.2 | Denmark |
| Male   | 1981 | 4.1 | 3.5 | 4.7 | Denmark |
| Male   | 1982 | 3.7 | 3.1 | 4.3 | Denmark |
| Male   | 1983 | 4.6 | 3.9 | 5.3 | Denmark |
| Male   | 1984 | 4.8 | 4.1 | 5.5 | Denmark |
| Male   | 1985 | 4.5 | 3.8 | 5.2 | Denmark |
| Male   | 1986 | 3.8 | 3.2 | 4.4 | Denmark |
| Male   | 1987 | 4.8 | 4.1 | 5.5 | Denmark |
| Male   | 1988 | 4.9 | 4.2 | 5.6 | Denmark |
| Male   | 1989 | 4.8 | 4.1 | 5.5 | Denmark |
| Male   | 1990 | 5.4 | 4.7 | 6.1 | Denmark |
| Male   | 1991 | 5.1 | 4.4 | 5.8 | Denmark |
| Male   | 1992 | 5.4 | 4.7 | 6.1 | Denmark |
| Male   | 1993 | 5.1 | 4.4 | 5.8 | Denmark |
| Male   | 1994 | 5.9 | 5.2 | 6.6 | Denmark |
| Male   | 1995 | 5.7 | 5.0 | 6.4 | Denmark |
| Male   | 1996 | 6.3 | 5.5 | 7.1 | Denmark |
| Male   | 1997 | 5.6 | 4.9 | 6.3 | Denmark |
| Male   | 1998 | 6.3 | 5.6 | 7.0 | Denmark |
| Male   | 1999 | 6.6 | 5.8 | 7.4 | Denmark |
| Male   | 2000 | 6.5 | 5.7 | 7.3 | Denmark |
| Male   | 2001 | 6.7 | 5.9 | 7.5 | Denmark |

|      |      |     |     |      |         |
|------|------|-----|-----|------|---------|
| Male | 2002 | 7.1 | 6.3 | 7.9  | Denmark |
| Male | 2003 | 5.7 | 5.0 | 6.4  | Denmark |
| Male | 2004 | 6.1 | 5.4 | 6.8  | Denmark |
| Male | 2005 | 6.1 | 5.4 | 6.8  | Denmark |
| Male | 2006 | 5.7 | 5.0 | 6.4  | Denmark |
| Male | 2007 | 5.5 | 4.8 | 6.2  | Denmark |
| Male | 2008 | 4.5 | 3.9 | 5.1  | Denmark |
| Male | 2009 | 5.2 | 4.6 | 5.8  | Denmark |
| Male | 2010 | 5.4 | 4.8 | 6.0  | Denmark |
| Male | 2011 | 5.9 | 5.2 | 6.6  | Denmark |
| Male | 2012 | 5.9 | 5.3 | 6.5  | Denmark |
| Male | 2013 | 5.3 | 4.7 | 5.9  | Denmark |
| Male | 2014 | 5.2 | 4.6 | 5.8  | Denmark |
| Male | 2015 | 5.2 | 4.6 | 5.8  | Denmark |
| Male | 2016 | 5.0 | 4.4 | 5.6  | Denmark |
| Male | 2017 | 5.4 | 4.8 | 6.0  | Denmark |
| Male | 2018 | 4.9 | 4.3 | 5.5  | Denmark |
| Male | 2019 | 5.9 | 5.3 | 6.5  | Denmark |
| Male | 1953 | 8.5 | 7.1 | 9.9  | Finland |
| Male | 1954 | 8.0 | 6.6 | 9.4  | Finland |
| Male | 1955 | 8.8 | 7.4 | 10.2 | Finland |
| Male | 1956 | 8.9 | 7.5 | 10.3 | Finland |
| Male | 1957 | 9.0 | 7.6 | 10.4 | Finland |
| Male | 1958 | 7.1 | 5.9 | 8.3  | Finland |
| Male | 1959 | 7.2 | 6.0 | 8.4  | Finland |
| Male | 1960 | 7.5 | 6.2 | 8.8  | Finland |
| Male | 1961 | 6.6 | 5.5 | 7.7  | Finland |
| Male | 1962 | 6.9 | 5.7 | 8.1  | Finland |
| Male | 1963 | 5.7 | 4.7 | 6.7  | Finland |
| Male | 1964 | 6.8 | 5.6 | 8.0  | Finland |
| Male | 1965 | 5.6 | 4.6 | 6.6  | Finland |
| Male | 1966 | 5.7 | 4.7 | 6.7  | Finland |
| Male | 1967 | 4.9 | 3.9 | 5.9  | Finland |
| Male | 1968 | 4.3 | 3.4 | 5.2  | Finland |
| Male | 1969 | 4.8 | 3.9 | 5.7  | Finland |
| Male | 1970 | 5.0 | 4.1 | 5.9  | Finland |
| Male | 1971 | 4.3 | 3.4 | 5.2  | Finland |
| Male | 1972 | 3.9 | 3.1 | 4.7  | Finland |
| Male | 1973 | 4.1 | 3.3 | 4.9  | Finland |
| Male | 1974 | 3.5 | 2.8 | 4.2  | Finland |
| Male | 1975 | 3.8 | 3.0 | 4.6  | Finland |
| Male | 1976 | 3.5 | 2.8 | 4.2  | Finland |
| Male | 1977 | 3.3 | 2.6 | 4.0  | Finland |
| Male | 1978 | 3.5 | 2.8 | 4.2  | Finland |
| Male | 1979 | 3.1 | 2.4 | 3.8  | Finland |
| Male | 1980 | 3.5 | 2.8 | 4.2  | Finland |

|        |      |     |     |     |         |
|--------|------|-----|-----|-----|---------|
| Male   | 1981 | 3.6 | 2.9 | 4.3 | Finland |
| Male   | 1982 | 3.2 | 2.5 | 3.9 | Finland |
| Male   | 1983 | 3.0 | 2.4 | 3.6 | Finland |
| Male   | 1984 | 2.6 | 2.0 | 3.2 | Finland |
| Male   | 1985 | 3.1 | 2.5 | 3.7 | Finland |
| Male   | 1986 | 2.4 | 1.9 | 2.9 | Finland |
| Male   | 1987 | 3.1 | 2.5 | 3.7 | Finland |
| Male   | 1988 | 2.9 | 2.3 | 3.5 | Finland |
| Male   | 1989 | 3.0 | 2.4 | 3.6 | Finland |
| Male   | 1990 | 2.8 | 2.2 | 3.4 | Finland |
| Male   | 1991 | 3.5 | 2.9 | 4.1 | Finland |
| Male   | 1992 | 2.8 | 2.2 | 3.4 | Finland |
| Male   | 1993 | 3.1 | 2.5 | 3.7 | Finland |
| Male   | 1994 | 2.6 | 2.1 | 3.1 | Finland |
| Male   | 1995 | 3.7 | 3.1 | 4.3 | Finland |
| Male   | 1996 | 2.8 | 2.3 | 3.3 | Finland |
| Male   | 1997 | 2.7 | 2.2 | 3.2 | Finland |
| Male   | 1998 | 2.6 | 2.1 | 3.1 | Finland |
| Male   | 1999 | 3.2 | 2.6 | 3.8 | Finland |
| Male   | 2000 | 2.5 | 2.0 | 3.0 | Finland |
| Male   | 2001 | 3.1 | 2.6 | 3.6 | Finland |
| Male   | 2002 | 2.9 | 2.4 | 3.4 | Finland |
| Male   | 2003 | 2.9 | 2.4 | 3.4 | Finland |
| Male   | 2004 | 2.7 | 2.2 | 3.2 | Finland |
| Male   | 2005 | 3.0 | 2.5 | 3.5 | Finland |
| Male   | 2006 | 2.4 | 2.0 | 2.8 | Finland |
| Male   | 2007 | 3.4 | 2.9 | 3.9 | Finland |
| Male   | 2008 | 2.4 | 2.0 | 2.8 | Finland |
| Male   | 2009 | 2.9 | 2.4 | 3.4 | Finland |
| Male   | 2010 | 3.2 | 2.7 | 3.7 | Finland |
| Male   | 2011 | 3.1 | 2.6 | 3.6 | Finland |
| Male   | 2012 | 3.3 | 2.8 | 3.8 | Finland |
| Male   | 2013 | 3.2 | 2.7 | 3.7 | Finland |
| Male   | 2014 | 3.1 | 2.6 | 3.6 | Finland |
| Male   | 2015 | 3.0 | 2.5 | 3.5 | Finland |
| Male   | 2016 | 3.2 | 2.7 | 3.7 | Finland |
| Male   | 2017 | 3.3 | 2.8 | 3.8 | Finland |
| Male   | 2018 | 3.5 | 3.0 | 4.0 | Finland |
| Male   | 2019 | 3.2 | 2.8 | 3.6 | Finland |
| Female | 1953 | 6.8 | 5.8 | 7.8 | Finland |
| Female | 1954 | 5.8 | 4.9 | 6.7 | Finland |
| Female | 1955 | 6.0 | 5.0 | 7.0 | Finland |
| Female | 1956 | 5.2 | 4.3 | 6.1 | Finland |
| Female | 1957 | 6.1 | 5.2 | 7.0 | Finland |
| Female | 1958 | 5.9 | 5.0 | 6.8 | Finland |
| Female | 1959 | 5.9 | 5.0 | 6.8 | Finland |

|        |      |     |     |     |         |
|--------|------|-----|-----|-----|---------|
| Female | 1960 | 5.0 | 4.2 | 5.8 | Finland |
| Female | 1961 | 5.4 | 4.6 | 6.2 | Finland |
| Female | 1962 | 4.3 | 3.6 | 5.0 | Finland |
| Female | 1963 | 4.8 | 4.0 | 5.6 | Finland |
| Female | 1964 | 4.7 | 3.9 | 5.5 | Finland |
| Female | 1965 | 4.4 | 3.7 | 5.1 | Finland |
| Female | 1966 | 4.2 | 3.5 | 4.9 | Finland |
| Female | 1967 | 3.6 | 3.0 | 4.2 | Finland |
| Female | 1968 | 3.5 | 2.9 | 4.1 | Finland |
| Female | 1969 | 3.5 | 2.9 | 4.1 | Finland |
| Female | 1970 | 3.2 | 2.6 | 3.8 | Finland |
| Female | 1971 | 3.5 | 2.9 | 4.1 | Finland |
| Female | 1972 | 3.3 | 2.7 | 3.9 | Finland |
| Female | 1973 | 2.8 | 2.3 | 3.3 | Finland |
| Female | 1974 | 2.3 | 1.8 | 2.8 | Finland |
| Female | 1975 | 2.9 | 2.4 | 3.4 | Finland |
| Female | 1976 | 2.7 | 2.2 | 3.2 | Finland |
| Female | 1977 | 2.2 | 1.8 | 2.6 | Finland |
| Female | 1978 | 2.3 | 1.9 | 2.7 | Finland |
| Female | 1979 | 2.1 | 1.7 | 2.5 | Finland |
| Female | 1980 | 2.1 | 1.7 | 2.5 | Finland |
| Female | 1981 | 2.2 | 1.8 | 2.6 | Finland |
| Female | 1982 | 2.0 | 1.6 | 2.4 | Finland |
| Female | 1983 | 1.9 | 1.5 | 2.3 | Finland |
| Female | 1984 | 1.7 | 1.4 | 2.0 | Finland |
| Female | 1985 | 2.2 | 1.8 | 2.6 | Finland |
| Female | 1986 | 1.9 | 1.5 | 2.3 | Finland |
| Female | 1987 | 1.5 | 1.2 | 1.8 | Finland |
| Female | 1988 | 1.8 | 1.5 | 2.1 | Finland |
| Female | 1989 | 1.6 | 1.3 | 1.9 | Finland |
| Female | 1990 | 1.3 | 1.0 | 1.6 | Finland |
| Female | 1991 | 1.2 | 0.9 | 1.5 | Finland |
| Female | 1992 | 1.3 | 1.0 | 1.6 | Finland |
| Female | 1993 | 1.4 | 1.1 | 1.7 | Finland |
| Female | 1994 | 1.0 | 0.7 | 1.2 | Finland |
| Female | 1995 | 1.1 | 0.9 | 1.3 | Finland |
| Female | 1996 | 1.1 | 0.9 | 1.3 | Finland |
| Female | 1997 | 1.3 | 1.0 | 1.6 | Finland |
| Female | 1998 | 1.0 | 0.8 | 1.2 | Finland |
| Female | 1999 | 1.0 | 0.8 | 1.2 | Finland |
| Female | 2000 | 1.0 | 0.8 | 1.2 | Finland |
| Female | 2001 | 0.8 | 0.6 | 1.0 | Finland |
| Female | 2002 | 0.9 | 0.7 | 1.1 | Finland |
| Female | 2003 | 0.6 | 0.5 | 0.8 | Finland |
| Female | 2004 | 1.0 | 0.7 | 1.2 | Finland |
| Female | 2005 | 1.0 | 0.8 | 1.2 | Finland |

|        |      |     |       |      |         |
|--------|------|-----|-------|------|---------|
| Female | 2006 | 1.0 | 0.8   | 1.2  | Finland |
| Female | 2007 | 1.1 | 0.9   | 1.3  | Finland |
| Female | 2008 | 0.7 | 0.6   | 0.9  | Finland |
| Female | 2009 | 0.9 | 0.7   | 1.1  | Finland |
| Female | 2010 | 1.0 | 0.8   | 1.2  | Finland |
| Female | 2011 | 0.9 | 0.7   | 1.1  | Finland |
| Female | 2012 | 0.9 | 0.7   | 1.1  | Finland |
| Female | 2013 | 0.8 | 0.6   | 1.0  | Finland |
| Female | 2014 | 1.0 | 0.8   | 1.2  | Finland |
| Female | 2015 | 0.8 | 0.6   | 0.9  | Finland |
| Female | 2016 | 0.8 | 0.6   | 1.0  | Finland |
| Female | 2017 | 0.9 | 0.7   | 1.1  | Finland |
| Female | 2018 | 0.8 | 0.6   | 1.0  | Finland |
| Female | 2019 | 0.9 | 0.7   | 1.1  | Finland |
| Female | 1951 | 7.5 | 1.5   | 13.5 | Iceland |
| Female | 1953 | 4.8 | 0.6   | 9.0  | Iceland |
| Female | 1954 | 1.4 | (1.3) | 4.1  | Iceland |
| Female | 1955 | 2.7 | (0.4) | 5.8  | Iceland |
| Female | 1956 | 4.7 | 0.6   | 8.8  | Iceland |
| Female | 1957 | 4.6 | 0.6   | 8.6  | Iceland |
| Female | 1958 | 1.3 | (1.2) | 3.8  | Iceland |
| Female | 1959 | 6.9 | 1.8   | 12.0 | Iceland |
| Female | 1960 | 5.7 | 1.1   | 10.3 | Iceland |
| Female | 1961 | 3.2 | 0.1   | 6.3  | Iceland |
| Female | 1962 | 8.1 | 3.1   | 13.1 | Iceland |
| Female | 1963 | 4.7 | 0.9   | 8.5  | Iceland |
| Female | 1964 | 4.4 | 0.9   | 7.9  | Iceland |
| Female | 1965 | 3.4 | 0.4   | 6.4  | Iceland |
| Female | 1966 | 3.0 | 0.1   | 5.9  | Iceland |
| Female | 1967 | 4.4 | 1.1   | 7.7  | Iceland |
| Female | 1968 | 2.1 | (0.3) | 4.5  | Iceland |
| Female | 1969 | 3.8 | 0.5   | 7.1  | Iceland |
| Female | 1970 | 0.5 | (0.5) | 1.4  | Iceland |
| Female | 1971 | 2.0 | (0.3) | 4.3  | Iceland |
| Female | 1972 | 3.5 | 0.7   | 6.3  | Iceland |
| Female | 1973 | 0.4 | (0.3) | 1.0  | Iceland |
| Female | 1974 | 5.2 | 1.3   | 9.1  | Iceland |
| Female | 1975 | 0.3 | (0.3) | 0.9  | Iceland |
| Female | 1976 | 4.2 | 0.8   | 7.6  | Iceland |
| Female | 1977 | 2.0 | 0.2   | 3.8  | Iceland |
| Female | 1978 | 1.1 | (0.4) | 2.6  | Iceland |
| Female | 1979 | 3.4 | 0.1   | 6.7  | Iceland |
| Female | 1980 | 2.5 | 0.1   | 5.0  | Iceland |
| Female | 1981 | 1.2 | (0.5) | 2.9  | Iceland |
| Female | 1982 | 3.4 | 0.9   | 5.9  | Iceland |
| Female | 1983 | 2.7 | 0.5   | 4.9  | Iceland |

|        |      |      |       |      |         |
|--------|------|------|-------|------|---------|
| Female | 1984 | 1.2  | (0.5) | 2.9  | Iceland |
| Female | 1985 | 1.7  | (0.2) | 3.6  | Iceland |
| Female | 1986 | 1.6  | 0.0   | 3.2  | Iceland |
| Female | 1987 | 1.2  | 0.0   | 2.4  | Iceland |
| Female | 1988 | 1.8  | 0.0   | 3.6  | Iceland |
| Female | 1990 | 0.8  | (0.3) | 1.9  | Iceland |
| Female | 1991 | 1.3  | (0.2) | 2.8  | Iceland |
| Female | 1992 | 1.4  | (0.5) | 3.3  | Iceland |
| Female | 1993 | 3.5  | 1.1   | 5.9  | Iceland |
| Female | 1994 | 2.8  | 0.6   | 5.0  | Iceland |
| Female | 1995 | 2.4  | 0.0   | 4.8  | Iceland |
| Female | 1996 | 3.7  | 1.3   | 6.1  | Iceland |
| Female | 1997 | 2.5  | 0.5   | 4.5  | Iceland |
| Female | 1998 | 1.8  | 0.4   | 3.2  | Iceland |
| Female | 1999 | 0.4  | (0.2) | 1.0  | Iceland |
| Female | 2000 | 0.5  | (0.2) | 1.2  | Iceland |
| Female | 2001 | 1.1  | 0.0   | 2.2  | Iceland |
| Female | 2002 | 1.3  | (0.2) | 2.8  | Iceland |
| Female | 2003 | 1.1  | (0.1) | 2.3  | Iceland |
| Female | 2004 | 1.4  | 0.0   | 2.8  | Iceland |
| Female | 2005 | 1.2  | 0.0   | 2.4  | Iceland |
| Female | 2006 | 0.9  | (0.3) | 2.1  | Iceland |
| Female | 2007 | 1.8  | 0.2   | 3.4  | Iceland |
| Female | 2008 | 1.6  | 0.2   | 3.0  | Iceland |
| Female | 2009 | 0.5  | (0.1) | 1.1  | Iceland |
| Female | 2010 | 1.2  | 0.1   | 2.3  | Iceland |
| Female | 2011 | 1.5  | 0.2   | 2.8  | Iceland |
| Female | 2012 | 1.3  | 0.2   | 2.4  | Iceland |
| Female | 2013 | 1.6  | 0.2   | 3.0  | Iceland |
| Female | 2014 | 1.0  | (0.1) | 2.1  | Iceland |
| Female | 2015 | 1.0  | 0.1   | 1.8  | Iceland |
| Female | 2016 | 2.6  | 0.8   | 4.4  | Iceland |
| Female | 2017 | 0.9  | (0.1) | 2.0  | Iceland |
| Female | 2018 | 0.9  | 0.0   | 1.7  | Iceland |
| Female | 2019 | 0.1  | (0.1) | 0.4  | Iceland |
| Male   | 1951 | 6.4  | 0.8   | 12.0 | Iceland |
| Male   | 1952 | 15.8 | 6.9   | 24.7 | Iceland |
| Male   | 1953 | 6.4  | 0.8   | 12.0 | Iceland |
| Male   | 1954 | 5.1  | 0.1   | 10.1 | Iceland |
| Male   | 1955 | 10.8 | 3.3   | 18.3 | Iceland |
| Male   | 1956 | 5.0  | 0.1   | 9.9  | Iceland |
| Male   | 1957 | 11.9 | 4.5   | 19.3 | Iceland |
| Male   | 1958 | 2.1  | (0.8) | 5.0  | Iceland |
| Male   | 1959 | 5.1  | 0.1   | 10.1 | Iceland |
| Male   | 1960 | 13.6 | 5.6   | 21.6 | Iceland |
| Male   | 1961 | 7.4  | 1.5   | 13.3 | Iceland |

|      |      |     |       |      |         |
|------|------|-----|-------|------|---------|
| Male | 1962 | 3.7 | 0.1   | 7.3  | Iceland |
| Male | 1963 | 6.1 | 1.2   | 11.0 | Iceland |
| Male | 1964 | 5.8 | 0.7   | 10.9 | Iceland |
| Male | 1965 | 4.9 | 0.6   | 9.2  | Iceland |
| Male | 1966 | 7.2 | 2.2   | 12.2 | Iceland |
| Male | 1967 | 4.6 | 0.9   | 8.3  | Iceland |
| Male | 1968 | 0.9 | (0.8) | 2.6  | Iceland |
| Male | 1969 | 9.9 | 3.8   | 16.0 | Iceland |
| Male | 1970 | 7.6 | 2.3   | 12.9 | Iceland |
| Male | 1971 | 2.0 | (0.8) | 4.8  | Iceland |
| Male | 1972 | 3.1 | 0.1   | 6.1  | Iceland |
| Male | 1973 | 3.5 | 0.4   | 6.6  | Iceland |
| Male | 1974 | 3.1 | 0.1   | 6.1  | Iceland |
| Male | 1975 | 4.0 | 0.1   | 7.9  | Iceland |
| Male | 1976 | 4.2 | 0.5   | 7.9  | Iceland |
| Male | 1977 | 4.7 | 0.6   | 8.8  | Iceland |
| Male | 1978 | 1.7 | (0.2) | 3.6  | Iceland |
| Male | 1979 | 2.7 | 0.1   | 5.3  | Iceland |
| Male | 1980 | 5.9 | 2.0   | 9.8  | Iceland |
| Male | 1981 | 0.9 | (0.8) | 2.6  | Iceland |
| Male | 1982 | 4.2 | 0.8   | 7.6  | Iceland |
| Male | 1983 | 1.4 | (0.5) | 3.3  | Iceland |
| Male | 1984 | 5.3 | 1.6   | 9.0  | Iceland |
| Male | 1985 | 7.7 | 3.1   | 12.3 | Iceland |
| Male | 1986 | 1.7 | (0.2) | 3.6  | Iceland |
| Male | 1987 | 2.2 | 0.0   | 4.4  | Iceland |
| Male | 1988 | 2.5 | (0.3) | 5.3  | Iceland |
| Male | 1989 | 3.4 | 0.7   | 6.1  | Iceland |
| Male | 1990 | 4.7 | 1.2   | 8.2  | Iceland |
| Male | 1991 | 7.1 | 3.2   | 11.0 | Iceland |
| Male | 1992 | 1.8 | 0.0   | 3.6  | Iceland |
| Male | 1993 | 2.3 | 0.0   | 4.6  | Iceland |
| Male | 1994 | 4.7 | 1.6   | 7.8  | Iceland |
| Male | 1995 | 7.4 | 3.5   | 11.3 | Iceland |
| Male | 1996 | 5.9 | 2.6   | 9.2  | Iceland |
| Male | 1997 | 8.3 | 4.0   | 12.6 | Iceland |
| Male | 1998 | 4.5 | 2.0   | 7.0  | Iceland |
| Male | 1999 | 3.4 | 0.7   | 6.1  | Iceland |
| Male | 2000 | 4.6 | 1.7   | 7.5  | Iceland |
| Male | 2001 | 4.0 | 1.2   | 6.8  | Iceland |
| Male | 2002 | 3.6 | 0.7   | 6.5  | Iceland |
| Male | 2003 | 2.9 | 0.6   | 5.2  | Iceland |
| Male | 2004 | 3.2 | 0.8   | 5.6  | Iceland |
| Male | 2005 | 5.3 | 2.2   | 8.4  | Iceland |
| Male | 2006 | 4.8 | 1.7   | 7.9  | Iceland |
| Male | 2007 | 5.3 | 2.4   | 8.2  | Iceland |



|      |      |     |     |      |         |
|------|------|-----|-----|------|---------|
| Male | 2008 | 5.8 | 2.9 | 8.7  | Iceland |
| Male | 2009 | 5.3 | 2.2 | 8.4  | Iceland |
| Male | 2010 | 5.9 | 2.8 | 9.0  | Iceland |
| Male | 2011 | 5.8 | 2.9 | 8.7  | Iceland |
| Male | 2012 | 3.5 | 1.3 | 5.7  | Iceland |
| Male | 2013 | 5.7 | 2.8 | 8.6  | Iceland |
| Male | 2014 | 3.4 | 1.3 | 5.5  | Iceland |
| Male | 2015 | 3.0 | 1.0 | 5.0  | Iceland |
| Male | 2016 | 4.6 | 2.1 | 7.1  | Iceland |
| Male | 2017 | 3.8 | 1.6 | 6.0  | Iceland |
| Male | 2018 | 7.2 | 4.3 | 10.1 | Iceland |
| Male | 2019 | 3.8 | 1.7 | 5.9  | Iceland |
| Male | 1961 | 3.1 | 2.4 | 3.8  | Norway  |
| Male | 1962 | 3.2 | 2.5 | 3.9  | Norway  |
| Male | 1963 | 3.1 | 2.4 | 3.8  | Norway  |
| Male | 1964 | 1.8 | 1.3 | 2.3  | Norway  |
| Male | 1965 | 3.0 | 2.3 | 3.7  | Norway  |
| Male | 1966 | 2.5 | 1.9 | 3.1  | Norway  |
| Male | 1967 | 2.2 | 1.7 | 2.7  | Norway  |
| Male | 1968 | 2.7 | 2.1 | 3.3  | Norway  |
| Male | 1969 | 2.8 | 2.2 | 3.4  | Norway  |
| Male | 1970 | 2.2 | 1.7 | 2.7  | Norway  |
| Male | 1971 | 2.3 | 1.7 | 2.9  | Norway  |
| Male | 1972 | 2.6 | 2.0 | 3.2  | Norway  |
| Male | 1973 | 2.7 | 2.1 | 3.3  | Norway  |
| Male | 1974 | 1.9 | 1.4 | 2.4  | Norway  |
| Male | 1975 | 3.0 | 2.4 | 3.6  | Norway  |
| Male | 1976 | 2.4 | 1.8 | 3.0  | Norway  |
| Male | 1977 | 2.8 | 2.2 | 3.4  | Norway  |
| Male | 1978 | 2.6 | 2.0 | 3.2  | Norway  |
| Male | 1979 | 2.4 | 1.9 | 2.9  | Norway  |
| Male | 1980 | 2.4 | 1.9 | 2.9  | Norway  |
| Male | 1981 | 2.7 | 2.1 | 3.3  | Norway  |
| Male | 1982 | 2.8 | 2.2 | 3.4  | Norway  |
| Male | 1983 | 2.4 | 1.9 | 2.9  | Norway  |
| Male | 1984 | 2.4 | 1.9 | 2.9  | Norway  |
| Male | 1985 | 2.2 | 1.7 | 2.7  | Norway  |
| Male | 1986 | 2.1 | 1.6 | 2.6  | Norway  |
| Male | 1987 | 2.6 | 2.1 | 3.1  | Norway  |
| Male | 1988 | 2.8 | 2.2 | 3.4  | Norway  |
| Male | 1989 | 2.8 | 2.2 | 3.4  | Norway  |
| Male | 1990 | 3.0 | 2.4 | 3.6  | Norway  |
| Male | 1991 | 3.4 | 2.8 | 4.0  | Norway  |
| Male | 1992 | 3.0 | 2.4 | 3.6  | Norway  |
| Male | 1993 | 3.2 | 2.6 | 3.8  | Norway  |
| Male | 1994 | 2.8 | 2.2 | 3.4  | Norway  |

|        |      |     |     |     |        |
|--------|------|-----|-----|-----|--------|
| Male   | 1995 | 3.1 | 2.5 | 3.7 | Norway |
| Male   | 1996 | 2.5 | 2.0 | 3.0 | Norway |
| Male   | 1997 | 3.2 | 2.6 | 3.8 | Norway |
| Male   | 1998 | 3.0 | 2.4 | 3.6 | Norway |
| Male   | 1999 | 3.1 | 2.5 | 3.7 | Norway |
| Male   | 2000 | 2.8 | 2.3 | 3.3 | Norway |
| Male   | 2001 | 2.3 | 1.8 | 2.8 | Norway |
| Male   | 2002 | 3.3 | 2.7 | 3.9 | Norway |
| Male   | 2003 | 3.1 | 2.5 | 3.7 | Norway |
| Male   | 2004 | 3.5 | 2.9 | 4.1 | Norway |
| Male   | 2005 | 3.4 | 2.8 | 4.0 | Norway |
| Male   | 2006 | 3.3 | 2.7 | 3.9 | Norway |
| Male   | 2007 | 3.4 | 2.8 | 4.0 | Norway |
| Male   | 2008 | 3.2 | 2.7 | 3.7 | Norway |
| Male   | 2009 | 2.8 | 2.3 | 3.3 | Norway |
| Male   | 2010 | 3.7 | 3.1 | 4.3 | Norway |
| Male   | 2011 | 3.1 | 2.6 | 3.6 | Norway |
| Male   | 2012 | 3.4 | 2.9 | 3.9 | Norway |
| Male   | 2013 | 3.4 | 2.9 | 3.9 | Norway |
| Male   | 2014 | 3.4 | 2.9 | 3.9 | Norway |
| Male   | 2015 | 3.2 | 2.7 | 3.7 | Norway |
| Male   | 2016 | 3.3 | 2.8 | 3.8 | Norway |
| Male   | 2017 | 3.0 | 2.5 | 3.5 | Norway |
| Male   | 2018 | 3.6 | 3.1 | 4.1 | Norway |
| Male   | 2019 | 3.4 | 2.9 | 3.9 | Norway |
| Female | 1961 | 0.8 | 0.5 | 1.1 | Norway |
| Female | 1962 | 0.5 | 0.2 | 0.7 | Norway |
| Female | 1963 | 0.7 | 0.4 | 1.0 | Norway |
| Female | 1964 | 1.0 | 0.7 | 1.3 | Norway |
| Female | 1965 | 0.7 | 0.4 | 1.0 | Norway |
| Female | 1966 | 1.0 | 0.6 | 1.3 | Norway |
| Female | 1967 | 0.7 | 0.4 | 0.9 | Norway |
| Female | 1968 | 0.8 | 0.5 | 1.0 | Norway |
| Female | 1969 | 0.8 | 0.5 | 1.0 | Norway |
| Female | 1970 | 0.8 | 0.5 | 1.1 | Norway |
| Female | 1971 | 0.5 | 0.3 | 0.7 | Norway |
| Female | 1972 | 0.7 | 0.5 | 1.0 | Norway |
| Female | 1973 | 0.8 | 0.5 | 1.1 | Norway |
| Female | 1974 | 0.7 | 0.4 | 0.9 | Norway |
| Female | 1975 | 0.7 | 0.5 | 1.0 | Norway |
| Female | 1976 | 0.6 | 0.3 | 0.8 | Norway |
| Female | 1977 | 0.6 | 0.4 | 0.8 | Norway |
| Female | 1978 | 0.7 | 0.4 | 0.9 | Norway |
| Female | 1979 | 0.7 | 0.4 | 0.9 | Norway |
| Female | 1980 | 0.5 | 0.3 | 0.6 | Norway |
| Female | 1981 | 0.7 | 0.5 | 0.9 | Norway |

|        |      |     |     |     |        |
|--------|------|-----|-----|-----|--------|
| Female | 1982 | 0.6 | 0.4 | 0.8 | Norway |
| Female | 1983 | 0.6 | 0.4 | 0.8 | Norway |
| Female | 1984 | 0.7 | 0.4 | 0.9 | Norway |
| Female | 1985 | 0.5 | 0.3 | 0.7 | Norway |
| Female | 1986 | 0.7 | 0.5 | 1.0 | Norway |
| Female | 1987 | 0.5 | 0.3 | 0.7 | Norway |
| Female | 1988 | 0.9 | 0.7 | 1.2 | Norway |
| Female | 1989 | 0.5 | 0.3 | 0.8 | Norway |
| Female | 1990 | 0.6 | 0.4 | 0.9 | Norway |
| Female | 1991 | 0.8 | 0.5 | 1.0 | Norway |
| Female | 1992 | 0.7 | 0.4 | 0.9 | Norway |
| Female | 1993 | 0.6 | 0.4 | 0.8 | Norway |
| Female | 1994 | 0.8 | 0.5 | 1.0 | Norway |
| Female | 1995 | 0.5 | 0.3 | 0.7 | Norway |
| Female | 1996 | 0.8 | 0.5 | 1.0 | Norway |
| Female | 1997 | 0.8 | 0.6 | 1.1 | Norway |
| Female | 1998 | 0.8 | 0.6 | 1.0 | Norway |
| Female | 1999 | 0.9 | 0.6 | 1.2 | Norway |
| Female | 2000 | 0.7 | 0.5 | 0.9 | Norway |
| Female | 2001 | 0.8 | 0.6 | 1.1 | Norway |
| Female | 2002 | 0.8 | 0.5 | 1.1 | Norway |
| Female | 2003 | 0.9 | 0.6 | 1.1 | Norway |
| Female | 2004 | 1.1 | 0.8 | 1.4 | Norway |
| Female | 2005 | 1.0 | 0.7 | 1.3 | Norway |
| Female | 2006 | 0.8 | 0.6 | 1.0 | Norway |
| Female | 2007 | 0.5 | 0.3 | 0.7 | Norway |
| Female | 2008 | 0.8 | 0.6 | 1.1 | Norway |
| Female | 2009 | 0.9 | 0.7 | 1.2 | Norway |
| Female | 2010 | 1.0 | 0.7 | 1.2 | Norway |
| Female | 2011 | 0.7 | 0.4 | 0.9 | Norway |
| Female | 2012 | 0.9 | 0.6 | 1.1 | Norway |
| Female | 2013 | 0.8 | 0.6 | 1.0 | Norway |
| Female | 2014 | 0.9 | 0.7 | 1.2 | Norway |
| Female | 2015 | 0.8 | 0.6 | 1.0 | Norway |
| Female | 2016 | 0.8 | 0.6 | 1.1 | Norway |
| Female | 2017 | 0.8 | 0.6 | 1.0 | Norway |
| Female | 2018 | 0.8 | 0.6 | 1.0 | Norway |
| Female | 2019 | 0.8 | 0.6 | 1.0 | Norway |
| Female | 1952 | 1.3 | 1.0 | 1.6 | Sweden |
| Female | 1953 | 1.5 | 1.2 | 1.8 | Sweden |
| Female | 1954 | 1.3 | 1.0 | 1.6 | Sweden |
| Female | 1955 | 1.4 | 1.1 | 1.7 | Sweden |
| Female | 1956 | 1.5 | 1.2 | 1.8 | Sweden |
| Female | 1957 | 1.5 | 1.2 | 1.8 | Sweden |
| Female | 1958 | 1.0 | 0.8 | 1.2 | Sweden |
| Female | 1959 | 1.3 | 1.0 | 1.6 | Sweden |

|        |      |     |     |     |        |
|--------|------|-----|-----|-----|--------|
| Female | 1960 | 1.2 | 0.9 | 1.5 | Sweden |
| Female | 1961 | 1.1 | 0.9 | 1.3 | Sweden |
| Female | 1962 | 1.0 | 0.7 | 1.2 | Sweden |
| Female | 1963 | 1.2 | 0.9 | 1.5 | Sweden |
| Female | 1964 | 0.8 | 0.6 | 1.0 | Sweden |
| Female | 1965 | 1.0 | 0.8 | 1.2 | Sweden |
| Female | 1966 | 1.1 | 0.9 | 1.3 | Sweden |
| Female | 1967 | 1.1 | 0.9 | 1.3 | Sweden |
| Female | 1968 | 1.0 | 0.8 | 1.2 | Sweden |
| Female | 1969 | 0.9 | 0.7 | 1.0 | Sweden |
| Female | 1970 | 0.8 | 0.6 | 0.9 | Sweden |
| Female | 1971 | 1.0 | 0.8 | 1.2 | Sweden |
| Female | 1972 | 1.0 | 0.8 | 1.2 | Sweden |
| Female | 1973 | 1.0 | 0.8 | 1.2 | Sweden |
| Female | 1974 | 1.0 | 0.8 | 1.2 | Sweden |
| Female | 1975 | 0.8 | 0.6 | 1.0 | Sweden |
| Female | 1976 | 0.8 | 0.7 | 1.0 | Sweden |
| Female | 1977 | 0.9 | 0.7 | 1.1 | Sweden |
| Female | 1978 | 0.9 | 0.7 | 1.1 | Sweden |
| Female | 1979 | 0.8 | 0.7 | 1.0 | Sweden |
| Female | 1980 | 0.8 | 0.6 | 0.9 | Sweden |
| Female | 1981 | 0.8 | 0.6 | 0.9 | Sweden |
| Female | 1982 | 0.7 | 0.6 | 0.9 | Sweden |
| Female | 1983 | 0.7 | 0.6 | 0.9 | Sweden |
| Female | 1984 | 0.8 | 0.6 | 1.0 | Sweden |
| Female | 1985 | 0.7 | 0.5 | 0.8 | Sweden |
| Female | 1986 | 0.7 | 0.6 | 0.9 | Sweden |
| Female | 1987 | 0.9 | 0.7 | 1.0 | Sweden |
| Female | 1988 | 0.7 | 0.5 | 0.8 | Sweden |
| Female | 1989 | 1.0 | 0.8 | 1.2 | Sweden |
| Female | 1990 | 0.9 | 0.7 | 1.1 | Sweden |
| Female | 1991 | 0.9 | 0.7 | 1.1 | Sweden |
| Female | 1992 | 0.9 | 0.7 | 1.0 | Sweden |
| Female | 1993 | 1.0 | 0.8 | 1.2 | Sweden |
| Female | 1994 | 0.8 | 0.7 | 1.0 | Sweden |
| Female | 1995 | 0.8 | 0.6 | 1.0 | Sweden |
| Female | 1996 | 0.9 | 0.7 | 1.0 | Sweden |
| Female | 1997 | 0.7 | 0.6 | 0.9 | Sweden |
| Female | 1998 | 0.9 | 0.7 | 1.0 | Sweden |
| Female | 1999 | 0.8 | 0.6 | 0.9 | Sweden |
| Female | 2000 | 0.9 | 0.7 | 1.1 | Sweden |
| Female | 2001 | 1.0 | 0.8 | 1.2 | Sweden |
| Female | 2002 | 0.9 | 0.8 | 1.1 | Sweden |
| Female | 2003 | 1.0 | 0.8 | 1.1 | Sweden |
| Female | 2004 | 0.9 | 0.7 | 1.0 | Sweden |
| Female | 2005 | 0.8 | 0.7 | 1.0 | Sweden |

|        |      |     |     |     |        |
|--------|------|-----|-----|-----|--------|
| Female | 2006 | 0.9 | 0.7 | 1.0 | Sweden |
| Female | 2007 | 0.9 | 0.8 | 1.1 | Sweden |
| Female | 2008 | 0.8 | 0.6 | 1.0 | Sweden |
| Female | 2009 | 1.0 | 0.8 | 1.2 | Sweden |
| Female | 2010 | 0.8 | 0.6 | 0.9 | Sweden |
| Female | 2011 | 1.0 | 0.8 | 1.1 | Sweden |
| Female | 2012 | 0.9 | 0.7 | 1.0 | Sweden |
| Female | 2013 | 0.9 | 0.7 | 1.0 | Sweden |
| Female | 2014 | 0.7 | 0.6 | 0.8 | Sweden |
| Female | 2015 | 0.8 | 0.7 | 0.9 | Sweden |
| Female | 2016 | 1.0 | 0.8 | 1.2 | Sweden |
| Female | 2017 | 0.9 | 0.8 | 1.1 | Sweden |
| Female | 2018 | 0.9 | 0.8 | 1.1 | Sweden |
| Female | 2019 | 0.8 | 0.7 | 1.0 | Sweden |
| Male   | 1952 | 2.5 | 2.1 | 2.9 | Sweden |
| Male   | 1953 | 2.6 | 2.2 | 3.0 | Sweden |
| Male   | 1954 | 2.6 | 2.2 | 3.0 | Sweden |
| Male   | 1955 | 2.7 | 2.2 | 3.2 | Sweden |
| Male   | 1956 | 3.0 | 2.5 | 3.5 | Sweden |
| Male   | 1957 | 2.9 | 2.4 | 3.4 | Sweden |
| Male   | 1958 | 2.2 | 1.8 | 2.6 | Sweden |
| Male   | 1959 | 2.4 | 2.0 | 2.8 | Sweden |
| Male   | 1960 | 2.7 | 2.3 | 3.1 | Sweden |
| Male   | 1961 | 2.7 | 2.3 | 3.1 | Sweden |
| Male   | 1962 | 2.6 | 2.2 | 3.0 | Sweden |
| Male   | 1963 | 2.5 | 2.1 | 2.9 | Sweden |
| Male   | 1964 | 2.5 | 2.1 | 2.9 | Sweden |
| Male   | 1965 | 2.7 | 2.3 | 3.1 | Sweden |
| Male   | 1966 | 2.3 | 1.9 | 2.7 | Sweden |
| Male   | 1967 | 2.6 | 2.2 | 3.0 | Sweden |
| Male   | 1968 | 2.7 | 2.3 | 3.1 | Sweden |
| Male   | 1969 | 2.6 | 2.2 | 3.0 | Sweden |
| Male   | 1970 | 2.7 | 2.3 | 3.1 | Sweden |
| Male   | 1971 | 3.0 | 2.6 | 3.4 | Sweden |
| Male   | 1972 | 3.1 | 2.7 | 3.5 | Sweden |
| Male   | 1973 | 2.8 | 2.4 | 3.2 | Sweden |
| Male   | 1974 | 2.5 | 2.1 | 2.9 | Sweden |
| Male   | 1975 | 3.1 | 2.7 | 3.5 | Sweden |
| Male   | 1976 | 3.2 | 2.8 | 3.6 | Sweden |
| Male   | 1977 | 2.6 | 2.2 | 3.0 | Sweden |
| Male   | 1978 | 3.0 | 2.6 | 3.4 | Sweden |
| Male   | 1979 | 2.7 | 2.3 | 3.1 | Sweden |
| Male   | 1980 | 2.8 | 2.4 | 3.2 | Sweden |
| Male   | 1981 | 2.9 | 2.5 | 3.3 | Sweden |
| Male   | 1982 | 3.3 | 2.9 | 3.7 | Sweden |
| Male   | 1983 | 3.0 | 2.6 | 3.4 | Sweden |

|      |      |     |     |     |           |
|------|------|-----|-----|-----|-----------|
| Male | 1984 | 2.9 | 2.5 | 3.3 | Sweden    |
| Male | 1985 | 2.9 | 2.5 | 3.3 | Sweden    |
| Male | 1986 | 2.7 | 2.3 | 3.1 | Sweden    |
| Male | 1987 | 3.2 | 2.8 | 3.6 | Sweden    |
| Male | 1988 | 3.1 | 2.7 | 3.5 | Sweden    |
| Male | 1989 | 2.5 | 2.2 | 2.8 | Sweden    |
| Male | 1990 | 2.8 | 2.4 | 3.2 | Sweden    |
| Male | 1991 | 3.0 | 2.6 | 3.4 | Sweden    |
| Male | 1992 | 2.9 | 2.5 | 3.3 | Sweden    |
| Male | 1993 | 2.9 | 2.5 | 3.3 | Sweden    |
| Male | 1994 | 2.9 | 2.5 | 3.3 | Sweden    |
| Male | 1995 | 2.4 | 2.1 | 2.7 | Sweden    |
| Male | 1996 | 3.0 | 2.6 | 3.4 | Sweden    |
| Male | 1997 | 3.3 | 2.9 | 3.7 | Sweden    |
| Male | 1998 | 3.0 | 2.6 | 3.4 | Sweden    |
| Male | 1999 | 3.1 | 2.7 | 3.5 | Sweden    |
| Male | 2000 | 2.9 | 2.5 | 3.3 | Sweden    |
| Male | 2001 | 2.9 | 2.5 | 3.3 | Sweden    |
| Male | 2002 | 2.8 | 2.4 | 3.2 | Sweden    |
| Male | 2003 | 3.3 | 2.9 | 3.7 | Sweden    |
| Male | 2004 | 3.5 | 3.1 | 3.9 | Sweden    |
| Male | 2005 | 3.2 | 2.8 | 3.6 | Sweden    |
| Male | 2006 | 3.1 | 2.7 | 3.5 | Sweden    |
| Male | 2007 | 3.1 | 2.7 | 3.5 | Sweden    |
| Male | 2008 | 2.8 | 2.5 | 3.1 | Sweden    |
| Male | 2009 | 3.2 | 2.8 | 3.6 | Sweden    |
| Male | 2010 | 3.0 | 2.7 | 3.3 | Sweden    |
| Male | 2011 | 3.0 | 2.7 | 3.3 | Sweden    |
| Male | 2012 | 3.1 | 2.8 | 3.4 | Sweden    |
| Male | 2013 | 3.2 | 2.9 | 3.5 | Sweden    |
| Male | 2014 | 3.2 | 2.9 | 3.5 | Sweden    |
| Male | 2015 | 3.0 | 2.7 | 3.3 | Sweden    |
| Male | 2016 | 3.4 | 3.1 | 3.7 | Sweden    |
| Male | 2017 | 2.9 | 2.6 | 3.2 | Sweden    |
| Male | 2018 | 3.0 | 2.7 | 3.3 | Sweden    |
| Male | 2019 | 3.2 | 2.9 | 3.5 | Sweden    |
| Male | 1969 | 3.2 | 3.1 | 3.3 | USA White |
| Male | 1970 | 3.3 | 3.2 | 3.4 | USA White |
| Male | 1971 | 3.4 | 3.3 | 3.5 | USA White |
| Male | 1972 | 3.4 | 3.3 | 3.5 | USA White |
| Male | 1973 | 3.3 | 3.2 | 3.4 | USA White |
| Male | 1974 | 3.4 | 3.3 | 3.5 | USA White |
| Male | 1975 | 3.5 | 3.4 | 3.6 | USA White |
| Male | 1976 | 3.5 | 3.4 | 3.6 | USA White |
| Male | 1977 | 3.4 | 3.3 | 3.5 | USA White |
| Male | 1978 | 3.5 | 3.4 | 3.6 | USA White |

|      |      |      |      |      |           |
|------|------|------|------|------|-----------|
| Male | 1979 | 3.5  | 3.3  | 3.6  | USA White |
| Male | 1980 | 3.6  | 3.5  | 3.7  | USA White |
| Male | 1981 | 3.5  | 3.4  | 3.6  | USA White |
| Male | 1982 | 3.5  | 3.4  | 3.6  | USA White |
| Male | 1983 | 3.6  | 3.5  | 3.7  | USA White |
| Male | 1984 | 3.7  | 3.5  | 3.8  | USA White |
| Male | 1985 | 3.7  | 3.6  | 3.8  | USA White |
| Male | 1986 | 3.8  | 3.7  | 3.9  | USA White |
| Male | 1987 | 3.9  | 3.8  | 4.0  | USA White |
| Male | 1988 | 3.9  | 3.8  | 4.0  | USA White |
| Male | 1989 | 4.1  | 3.9  | 4.2  | USA White |
| Male | 1990 | 4.1  | 4.0  | 4.2  | USA White |
| Male | 1991 | 4.2  | 4.1  | 4.3  | USA White |
| Male | 1992 | 4.3  | 4.2  | 4.4  | USA White |
| Male | 1993 | 4.3  | 4.2  | 4.4  | USA White |
| Male | 1994 | 4.5  | 4.3  | 4.6  | USA White |
| Male | 1995 | 4.5  | 4.4  | 4.6  | USA White |
| Male | 1996 | 4.6  | 4.4  | 4.7  | USA White |
| Male | 1997 | 4.6  | 4.5  | 4.7  | USA White |
| Male | 1998 | 4.7  | 4.6  | 4.8  | USA White |
| Male | 1999 | 4.8  | 4.6  | 4.9  | USA White |
| Male | 2000 | 4.8  | 4.7  | 4.9  | USA White |
| Male | 2001 | 4.8  | 4.7  | 5.0  | USA White |
| Male | 2002 | 4.9  | 4.8  | 5.0  | USA White |
| Male | 2003 | 4.9  | 4.8  | 5.0  | USA White |
| Male | 2004 | 4.9  | 4.8  | 5.0  | USA White |
| Male | 2005 | 5.1  | 5.0  | 5.2  | USA White |
| Male | 2006 | 5.0  | 4.9  | 5.2  | USA White |
| Male | 2007 | 4.9  | 4.8  | 5.0  | USA White |
| Male | 2008 | 4.9  | 4.8  | 5.0  | USA White |
| Male | 2009 | 4.8  | 4.7  | 4.9  | USA White |
| Male | 2010 | 4.9  | 4.8  | 5.0  | USA White |
| Male | 2011 | 4.9  | 4.8  | 5.0  | USA White |
| Male | 2012 | 4.8  | 4.7  | 4.9  | USA White |
| Male | 2013 | 4.7  | 4.6  | 4.8  | USA White |
| Male | 2014 | 4.7  | 4.6  | 4.8  | USA White |
| Male | 2015 | 4.7  | 4.6  | 4.8  | USA White |
| Male | 2016 | 4.7  | 4.6  | 4.8  | USA White |
| Male | 2017 | 4.6  | 4.5  | 4.6  | USA White |
| Male | 2018 | 4.5  | 4.4  | 4.5  | USA White |
| Male | 2019 | 4.5  | 4.5  | 4.6  | USA White |
| Male | 1969 | 10.7 | 10.0 | 11.4 | USA Black |
| Male | 1970 | 10.5 | 9.9  | 11.2 | USA Black |
| Male | 1971 | 10.5 | 9.8  | 11.1 | USA Black |
| Male | 1972 | 11.0 | 10.4 | 11.7 | USA Black |
| Male | 1973 | 11.7 | 11.1 | 12.4 | USA Black |

|      |      |      |      |      |           |
|------|------|------|------|------|-----------|
| Male | 1974 | 11.7 | 11.0 | 12.4 | USA Black |
| Male | 1975 | 12.6 | 11.9 | 13.3 | USA Black |
| Male | 1976 | 13.3 | 12.6 | 14.0 | USA Black |
| Male | 1977 | 13.1 | 12.4 | 13.8 | USA Black |
| Male | 1978 | 13.2 | 12.5 | 13.9 | USA Black |
| Male | 1979 | 13.8 | 13.1 | 14.5 | USA Black |
| Male | 1980 | 13.4 | 12.7 | 14.1 | USA Black |
| Male | 1981 | 13.9 | 13.2 | 14.6 | USA Black |
| Male | 1982 | 13.7 | 13.1 | 14.5 | USA Black |
| Male | 1983 | 13.3 | 12.6 | 14.0 | USA Black |
| Male | 1984 | 13.8 | 13.1 | 14.5 | USA Black |
| Male | 1985 | 13.1 | 12.5 | 13.8 | USA Black |
| Male | 1986 | 13.4 | 12.7 | 14.1 | USA Black |
| Male | 1987 | 12.4 | 11.8 | 13.1 | USA Black |
| Male | 1988 | 13.4 | 12.8 | 14.1 | USA Black |
| Male | 1989 | 12.8 | 12.1 | 13.4 | USA Black |
| Male | 1990 | 11.9 | 11.3 | 12.5 | USA Black |
| Male | 1991 | 11.9 | 11.3 | 12.6 | USA Black |
| Male | 1992 | 10.9 | 10.4 | 11.5 | USA Black |
| Male | 1993 | 11.5 | 10.9 | 12.1 | USA Black |
| Male | 1994 | 10.8 | 10.3 | 11.4 | USA Black |
| Male | 1995 | 10.3 | 9.8  | 10.9 | USA Black |
| Male | 1996 | 9.5  | 9.0  | 10.1 | USA Black |
| Male | 1997 | 9.0  | 8.5  | 9.5  | USA Black |
| Male | 1998 | 8.5  | 8.0  | 9.0  | USA Black |
| Male | 1999 | 8.0  | 7.5  | 8.4  | USA Black |
| Male | 2000 | 7.5  | 7.1  | 8.0  | USA Black |
| Male | 2001 | 7.7  | 7.3  | 8.2  | USA Black |
| Male | 2002 | 6.9  | 6.5  | 7.3  | USA Black |
| Male | 2003 | 6.7  | 6.3  | 7.1  | USA Black |
| Male | 2004 | 6.0  | 5.7  | 6.4  | USA Black |
| Male | 2005 | 5.9  | 5.5  | 6.2  | USA Black |
| Male | 2006 | 5.6  | 5.2  | 5.9  | USA Black |
| Male | 2007 | 5.4  | 5.1  | 5.7  | USA Black |
| Male | 2008 | 5.0  | 4.7  | 5.4  | USA Black |
| Male | 2009 | 4.8  | 4.5  | 5.1  | USA Black |
| Male | 2010 | 4.8  | 4.5  | 5.1  | USA Black |
| Male | 2011 | 4.3  | 4.1  | 4.6  | USA Black |
| Male | 2012 | 4.2  | 3.9  | 4.5  | USA Black |
| Male | 2013 | 3.8  | 3.6  | 4.1  | USA Black |
| Male | 2014 | 3.5  | 3.3  | 3.8  | USA Black |
| Male | 2015 | 3.4  | 3.1  | 3.6  | USA Black |
| Male | 2016 | 3.4  | 3.2  | 3.6  | USA Black |
| Male | 2017 | 3.2  | 3.0  | 3.4  | USA Black |
| Male | 2018 | 3.0  | 2.8  | 3.2  | USA Black |
| Male | 2019 | 3.0  | 2.8  | 3.2  | USA Black |



|      |      |     |     |     |     |
|------|------|-----|-----|-----|-----|
| Male | 1969 | 3.9 | 3.8 | 4.0 | USA |
| Male | 1970 | 3.9 | 3.8 | 4.0 | USA |
| Male | 1971 | 4.0 | 3.9 | 4.1 | USA |
| Male | 1972 | 4.1 | 4.0 | 4.2 | USA |
| Male | 1973 | 4.0 | 3.9 | 4.1 | USA |
| Male | 1974 | 4.1 | 4.0 | 4.2 | USA |
| Male | 1975 | 4.3 | 4.1 | 4.4 | USA |
| Male | 1976 | 4.3 | 4.2 | 4.4 | USA |
| Male | 1977 | 4.2 | 4.1 | 4.4 | USA |
| Male | 1978 | 4.4 | 4.2 | 4.5 | USA |
| Male | 1979 | 4.3 | 4.2 | 4.4 | USA |
| Male | 1980 | 4.4 | 4.3 | 4.5 | USA |
| Male | 1981 | 4.4 | 4.3 | 4.5 | USA |
| Male | 1982 | 4.4 | 4.3 | 4.5 | USA |
| Male | 1983 | 4.5 | 4.3 | 4.6 | USA |
| Male | 1984 | 4.5 | 4.4 | 4.6 | USA |
| Male | 1985 | 4.5 | 4.4 | 4.6 | USA |
| Male | 1986 | 4.6 | 4.5 | 4.7 | USA |
| Male | 1987 | 4.6 | 4.5 | 4.7 | USA |
| Male | 1988 | 4.7 | 4.6 | 4.8 | USA |
| Male | 1989 | 4.8 | 4.7 | 4.9 | USA |
| Male | 1990 | 4.7 | 4.6 | 4.9 | USA |
| Male | 1991 | 4.8 | 4.7 | 4.9 | USA |
| Male | 1992 | 4.8 | 4.7 | 4.9 | USA |
| Male | 1993 | 4.9 | 4.7 | 5.0 | USA |
| Male | 1994 | 5.0 | 4.9 | 5.1 | USA |
| Male | 1995 | 4.9 | 4.8 | 5.0 | USA |
| Male | 1996 | 4.9 | 4.8 | 5.0 | USA |
| Male | 1997 | 4.9 | 4.8 | 5.0 | USA |
| Male | 1998 | 4.9 | 4.8 | 5.0 | USA |
| Male | 1999 | 5.0 | 4.9 | 5.1 | USA |
| Male | 2000 | 5.0 | 4.9 | 5.1 | USA |
| Male | 2001 | 5.0 | 4.9 | 5.1 | USA |
| Male | 2002 | 5.0 | 4.9 | 5.1 | USA |
| Male | 2003 | 4.9 | 4.8 | 5.0 | USA |
| Male | 2004 | 4.9 | 4.8 | 5.0 | USA |
| Male | 2005 | 5.0 | 4.9 | 5.1 | USA |
| Male | 2006 | 5.0 | 4.9 | 5.1 | USA |
| Male | 2007 | 4.8 | 4.7 | 4.9 | USA |
| Male | 2008 | 4.8 | 4.7 | 4.8 | USA |
| Male | 2009 | 4.7 | 4.6 | 4.8 | USA |
| Male | 2010 | 4.7 | 4.6 | 4.8 | USA |
| Male | 2011 | 4.7 | 4.6 | 4.7 | USA |
| Male | 2012 | 4.6 | 4.5 | 4.7 | USA |
| Male | 2013 | 4.5 | 4.4 | 4.6 | USA |
| Male | 2014 | 4.5 | 4.4 | 4.5 | USA |

|        |      |     |     |     |           |
|--------|------|-----|-----|-----|-----------|
| Male   | 2015 | 4.4 | 4.3 | 4.5 | USA       |
| Male   | 2016 | 4.4 | 4.3 | 4.5 | USA       |
| Male   | 2017 | 4.3 | 4.2 | 4.3 | USA       |
| Male   | 2018 | 4.1 | 4.1 | 4.2 | USA       |
| Male   | 2019 | 4.2 | 4.1 | 4.3 | USA       |
| Female | 1969 | 0.9 | 0.9 | 1.0 | USA White |
| Female | 1970 | 0.9 | 0.9 | 1.0 | USA White |
| Female | 1971 | 0.9 | 0.9 | 1.0 | USA White |
| Female | 1972 | 0.9 | 0.8 | 1.0 | USA White |
| Female | 1973 | 0.9 | 0.9 | 1.0 | USA White |
| Female | 1974 | 0.9 | 0.9 | 1.0 | USA White |
| Female | 1975 | 0.9 | 0.9 | 1.0 | USA White |
| Female | 1976 | 1.0 | 0.9 | 1.0 | USA White |
| Female | 1977 | 1.0 | 0.9 | 1.0 | USA White |
| Female | 1978 | 1.0 | 0.9 | 1.0 | USA White |
| Female | 1979 | 1.0 | 0.9 | 1.0 | USA White |
| Female | 1980 | 0.9 | 0.9 | 1.0 | USA White |
| Female | 1981 | 0.9 | 0.9 | 1.0 | USA White |
| Female | 1982 | 1.0 | 0.9 | 1.0 | USA White |
| Female | 1983 | 0.9 | 0.9 | 1.0 | USA White |
| Female | 1984 | 1.0 | 0.9 | 1.0 | USA White |
| Female | 1985 | 0.9 | 0.8 | 0.9 | USA White |
| Female | 1986 | 1.0 | 0.9 | 1.0 | USA White |
| Female | 1987 | 0.9 | 0.9 | 1.0 | USA White |
| Female | 1988 | 0.9 | 0.9 | 1.0 | USA White |
| Female | 1989 | 0.9 | 0.9 | 1.0 | USA White |
| Female | 1990 | 0.9 | 0.9 | 1.0 | USA White |
| Female | 1991 | 0.9 | 0.9 | 1.0 | USA White |
| Female | 1992 | 0.9 | 0.9 | 1.0 | USA White |
| Female | 1993 | 0.9 | 0.9 | 1.0 | USA White |
| Female | 1994 | 0.9 | 0.9 | 1.0 | USA White |
| Female | 1995 | 0.9 | 0.9 | 1.0 | USA White |
| Female | 1996 | 1.0 | 0.9 | 1.0 | USA White |
| Female | 1997 | 0.9 | 0.9 | 1.0 | USA White |
| Female | 1998 | 1.0 | 0.9 | 1.0 | USA White |
| Female | 1999 | 1.0 | 0.9 | 1.0 | USA White |
| Female | 2000 | 1.0 | 0.9 | 1.0 | USA White |
| Female | 2001 | 1.0 | 0.9 | 1.0 | USA White |
| Female | 2002 | 1.0 | 0.9 | 1.0 | USA White |
| Female | 2003 | 1.0 | 0.9 | 1.0 | USA White |
| Female | 2004 | 0.9 | 0.9 | 1.0 | USA White |
| Female | 2005 | 0.9 | 0.9 | 1.0 | USA White |
| Female | 2006 | 1.0 | 0.9 | 1.0 | USA White |
| Female | 2007 | 0.9 | 0.9 | 0.9 | USA White |
| Female | 2008 | 0.9 | 0.8 | 0.9 | USA White |
| Female | 2009 | 0.9 | 0.8 | 0.9 | USA White |

|        |      |     |     |     |           |
|--------|------|-----|-----|-----|-----------|
| Female | 2010 | 0.9 | 0.9 | 1.0 | USA White |
| Female | 2011 | 0.9 | 0.8 | 0.9 | USA White |
| Female | 2012 | 0.8 | 0.8 | 0.9 | USA White |
| Female | 2013 | 0.9 | 0.8 | 0.9 | USA White |
| Female | 2014 | 0.8 | 0.8 | 0.9 | USA White |
| Female | 2015 | 0.9 | 0.8 | 0.9 | USA White |
| Female | 2016 | 0.9 | 0.8 | 0.9 | USA White |
| Female | 2017 | 0.8 | 0.8 | 0.8 | USA White |
| Female | 2018 | 0.8 | 0.8 | 0.9 | USA White |
| Female | 2019 | 0.8 | 0.8 | 0.9 | USA White |
| Female | 1969 | 2.3 | 2.0 | 2.6 | USA Black |
| Female | 1970 | 2.6 | 2.3 | 2.9 | USA Black |
| Female | 1971 | 2.5 | 2.3 | 2.9 | USA Black |
| Female | 1972 | 3.0 | 2.7 | 3.4 | USA Black |
| Female | 1973 | 3.2 | 2.9 | 3.5 | USA Black |
| Female | 1974 | 3.1 | 2.8 | 3.5 | USA Black |
| Female | 1975 | 3.1 | 2.8 | 3.4 | USA Black |
| Female | 1976 | 3.2 | 2.9 | 3.6 | USA Black |
| Female | 1977 | 3.2 | 2.9 | 3.6 | USA Black |
| Female | 1978 | 3.2 | 2.9 | 3.6 | USA Black |
| Female | 1979 | 3.1 | 2.8 | 3.5 | USA Black |
| Female | 1980 | 3.7 | 3.4 | 4.0 | USA Black |
| Female | 1981 | 3.3 | 3.0 | 3.6 | USA Black |
| Female | 1982 | 3.4 | 3.1 | 3.7 | USA Black |
| Female | 1983 | 3.4 | 3.1 | 3.7 | USA Black |
| Female | 1984 | 3.5 | 3.2 | 3.8 | USA Black |
| Female | 1985 | 3.2 | 2.9 | 3.5 | USA Black |
| Female | 1986 | 3.3 | 3.0 | 3.6 | USA Black |
| Female | 1987 | 3.3 | 3.0 | 3.6 | USA Black |
| Female | 1988 | 2.8 | 2.6 | 3.1 | USA Black |
| Female | 1989 | 3.1 | 2.8 | 3.4 | USA Black |
| Female | 1990 | 3.1 | 2.9 | 3.4 | USA Black |
| Female | 1991 | 3.0 | 2.8 | 3.3 | USA Black |
| Female | 1992 | 3.0 | 2.7 | 3.2 | USA Black |
| Female | 1993 | 3.0 | 2.7 | 3.2 | USA Black |
| Female | 1994 | 2.8 | 2.5 | 3.0 | USA Black |
| Female | 1995 | 2.4 | 2.2 | 2.7 | USA Black |
| Female | 1996 | 2.6 | 2.4 | 2.8 | USA Black |
| Female | 1997 | 2.3 | 2.1 | 2.6 | USA Black |
| Female | 1998 | 2.4 | 2.2 | 2.6 | USA Black |
| Female | 1999 | 2.1 | 1.9 | 2.3 | USA Black |
| Female | 2000 | 2.1 | 1.9 | 2.3 | USA Black |
| Female | 2001 | 2.0 | 1.8 | 2.2 | USA Black |
| Female | 2002 | 1.9 | 1.8 | 2.1 | USA Black |
| Female | 2003 | 1.8 | 1.7 | 2.0 | USA Black |
| Female | 2004 | 1.9 | 1.7 | 2.1 | USA Black |

|        |      |     |     |     |           |
|--------|------|-----|-----|-----|-----------|
| Female | 2005 | 1.5 | 1.4 | 1.7 | USA Black |
| Female | 2006 | 1.5 | 1.4 | 1.7 | USA Black |
| Female | 2007 | 1.4 | 1.3 | 1.6 | USA Black |
| Female | 2008 | 1.5 | 1.3 | 1.6 | USA Black |
| Female | 2009 | 1.2 | 1.1 | 1.4 | USA Black |
| Female | 2010 | 1.3 | 1.2 | 1.4 | USA Black |
| Female | 2011 | 1.2 | 1.1 | 1.3 | USA Black |
| Female | 2012 | 1.2 | 1.1 | 1.4 | USA Black |
| Female | 2013 | 1.1 | 1.0 | 1.2 | USA Black |
| Female | 2014 | 1.1 | 1.0 | 1.2 | USA Black |
| Female | 2015 | 1.0 | 0.9 | 1.1 | USA Black |
| Female | 2016 | 1.0 | 0.9 | 1.1 | USA Black |
| Female | 2017 | 1.0 | 0.9 | 1.1 | USA Black |
| Female | 2018 | 1.0 | 0.9 | 1.1 | USA Black |
| Female | 2019 | 0.9 | 0.8 | 1.0 | USA Black |
| Female | 1969 | 1.0 | 1.0 | 1.1 | USA       |
| Female | 1970 | 1.1 | 1.0 | 1.1 | USA       |
| Female | 1971 | 1.1 | 1.0 | 1.1 | USA       |
| Female | 1972 | 1.1 | 1.0 | 1.2 | USA       |
| Female | 1973 | 1.1 | 1.1 | 1.2 | USA       |
| Female | 1974 | 1.1 | 1.1 | 1.2 | USA       |
| Female | 1975 | 1.1 | 1.1 | 1.2 | USA       |
| Female | 1976 | 1.2 | 1.1 | 1.2 | USA       |
| Female | 1977 | 1.2 | 1.1 | 1.2 | USA       |
| Female | 1978 | 1.2 | 1.1 | 1.2 | USA       |
| Female | 1979 | 1.2 | 1.1 | 1.2 | USA       |
| Female | 1980 | 1.2 | 1.1 | 1.3 | USA       |
| Female | 1981 | 1.2 | 1.1 | 1.2 | USA       |
| Female | 1982 | 1.2 | 1.2 | 1.3 | USA       |
| Female | 1983 | 1.2 | 1.1 | 1.2 | USA       |
| Female | 1984 | 1.2 | 1.1 | 1.3 | USA       |
| Female | 1985 | 1.1 | 1.1 | 1.2 | USA       |
| Female | 1986 | 1.2 | 1.1 | 1.2 | USA       |
| Female | 1987 | 1.2 | 1.1 | 1.2 | USA       |
| Female | 1988 | 1.1 | 1.1 | 1.2 | USA       |
| Female | 1989 | 1.1 | 1.1 | 1.2 | USA       |
| Female | 1990 | 1.1 | 1.1 | 1.2 | USA       |
| Female | 1991 | 1.1 | 1.1 | 1.2 | USA       |
| Female | 1992 | 1.1 | 1.1 | 1.2 | USA       |
| Female | 1993 | 1.1 | 1.1 | 1.2 | USA       |
| Female | 1994 | 1.1 | 1.0 | 1.1 | USA       |
| Female | 1995 | 1.1 | 1.0 | 1.1 | USA       |
| Female | 1996 | 1.1 | 1.1 | 1.2 | USA       |
| Female | 1997 | 1.1 | 1.0 | 1.1 | USA       |
| Female | 1998 | 1.1 | 1.1 | 1.1 | USA       |
| Female | 1999 | 1.1 | 1.0 | 1.1 | USA       |

|        |      |     |     |     |     |
|--------|------|-----|-----|-----|-----|
| Female | 2000 | 1.1 | 1.0 | 1.1 | USA |
| Female | 2001 | 1.1 | 1.0 | 1.1 | USA |
| Female | 2002 | 1.0 | 1.0 | 1.1 | USA |
| Female | 2003 | 1.0 | 1.0 | 1.1 | USA |
| Female | 2004 | 1.0 | 1.0 | 1.1 | USA |
| Female | 2005 | 1.0 | 0.9 | 1.0 | USA |
| Female | 2006 | 1.0 | 1.0 | 1.0 | USA |
| Female | 2007 | 0.9 | 0.9 | 1.0 | USA |
| Female | 2008 | 0.9 | 0.9 | 1.0 | USA |
| Female | 2009 | 0.9 | 0.9 | 0.9 | USA |
| Female | 2010 | 0.9 | 0.9 | 1.0 | USA |
| Female | 2011 | 0.9 | 0.9 | 0.9 | USA |
| Female | 2012 | 0.9 | 0.8 | 0.9 | USA |
| Female | 2013 | 0.9 | 0.8 | 0.9 | USA |
| Female | 2014 | 0.9 | 0.8 | 0.9 | USA |
| Female | 2015 | 0.8 | 0.8 | 0.9 | USA |
| Female | 2016 | 0.9 | 0.8 | 0.9 | USA |
| Female | 2017 | 0.8 | 0.8 | 0.8 | USA |
| Female | 2018 | 0.8 | 0.8 | 0.9 | USA |
| Female | 2019 | 0.8 | 0.8 | 0.9 | USA |

Table S7. The incidence ASR and correlated 95%CI.

| sex    | Year | ASR (World | CI95_low | CI95_high | Country |
|--------|------|------------|----------|-----------|---------|
| Male   | 1993 | 15.6       | 8.9      | 22.3      | Uganda  |
| Male   | 1994 | 10.5       | 5.5      | 15.5      | Uganda  |
| Male   | 1995 | 17.4       | 11.0     | 23.8      | Uganda  |
| Male   | 1996 | 9.9        | 5.6      | 14.2      | Uganda  |
| Male   | 1997 | 11.3       | 6.5      | 16.1      | Uganda  |
| Male   | 1998 | 19.9       | 13.0     | 26.8      | Uganda  |
| Male   | 1999 | 4.8        | 1.7      | 7.9       | Uganda  |
| Male   | 2000 | 14.5       | 8.8      | 20.2      | Uganda  |
| Male   | 2001 | 13.9       | 8.6      | 19.2      | Uganda  |
| Male   | 2002 | 18.6       | 12.2     | 25.0      | Uganda  |
| Male   | 2003 | 14.7       | 9.3      | 20.1      | Uganda  |
| Male   | 2004 | 16.2       | 10.5     | 21.9      | Uganda  |
| Male   | 2005 | 14.5       | 9.3      | 19.7      | Uganda  |
| Male   | 2006 | 17.6       | 12.1     | 23.1      | Uganda  |
| Male   | 2007 | 22.2       | 16.1     | 28.3      | Uganda  |
| Male   | 2008 | 19.2       | 13.7     | 24.7      | Uganda  |
| Male   | 2009 | 18.9       | 13.7     | 24.1      | Uganda  |
| Male   | 2010 | 30.0       | 23.4     | 36.6      | Uganda  |
| Male   | 2011 | 17.9       | 12.9     | 22.9      | Uganda  |
| Male   | 2012 | 19.7       | 14.5     | 24.9      | Uganda  |
| Female | 1993 | 5.7        | 2.2      | 9.2       | Uganda  |
| Female | 1994 | 12.1       | 6.7      | 17.5      | Uganda  |
| Female | 1995 | 20.4       | 13.1     | 27.7      | Uganda  |
| Female | 1996 | 11.2       | 6.0      | 16.4      | Uganda  |
| Female | 1997 | 8.4        | 4.1      | 12.7      | Uganda  |
| Female | 1998 | 11.9       | 6.7      | 17.1      | Uganda  |
| Female | 1999 | 7.4        | 3.4      | 11.4      | Uganda  |
| Female | 2000 | 7.6        | 3.3      | 11.9      | Uganda  |
| Female | 2001 | 6.5        | 3.0      | 10.0      | Uganda  |
| Female | 2002 | 10.2       | 5.8      | 14.6      | Uganda  |
| Female | 2003 | 14.6       | 9.1      | 20.1      | Uganda  |
| Female | 2004 | 12.2       | 7.7      | 16.7      | Uganda  |
| Female | 2005 | 6.2        | 3.2      | 9.2       | Uganda  |
| Female | 2006 | 16.8       | 11.5     | 22.1      | Uganda  |
| Female | 2007 | 11.2       | 7.1      | 15.3      | Uganda  |
| Female | 2008 | 12.4       | 8.1      | 16.7      | Uganda  |
| Female | 2009 | 8.5        | 5.3      | 11.7      | Uganda  |
| Female | 2010 | 13.5       | 9.5      | 17.5      | Uganda  |
| Female | 2011 | 12.2       | 8.2      | 16.2      | Uganda  |
| Female | 2012 | 11.8       | 8.1      | 15.5      | Uganda  |
| Male   | 1993 | 7.8        | 4.3      | 11.3      | Brazil  |
| Male   | 1994 | 9.1        | 5.2      | 13.0      | Brazil  |
| Male   | 1995 | 7.6        | 4.3      | 10.9      | Brazil  |
| Male   | 1996 | 9.1        | 5.6      | 12.6      | Brazil  |

|        |      |      |     |      |        |
|--------|------|------|-----|------|--------|
| Male   | 1997 | 9.8  | 6.2 | 13.4 | Brazil |
| Male   | 1998 | 12.4 | 8.4 | 16.4 | Brazil |
| Male   | 1999 | 8.2  | 4.9 | 11.5 | Brazil |
| Male   | 2000 | 9.4  | 6.2 | 12.6 | Brazil |
| Male   | 2001 | 7.0  | 4.4 | 9.6  | Brazil |
| Male   | 2002 | 7.3  | 4.5 | 10.1 | Brazil |
| Male   | 2003 | 9.5  | 6.4 | 12.6 | Brazil |
| Male   | 2004 | 8.9  | 5.9 | 11.9 | Brazil |
| Male   | 2005 | 9.3  | 6.3 | 12.3 | Brazil |
| Male   | 2006 | 8.1  | 5.3 | 10.9 | Brazil |
| Male   | 2007 | 8.1  | 5.5 | 10.7 | Brazil |
| Male   | 2008 | 6.8  | 4.5 | 9.1  | Brazil |
| Male   | 2009 | 4.3  | 2.5 | 6.1  | Brazil |
| Male   | 2010 | 6.7  | 4.6 | 8.8  | Brazil |
| Male   | 2011 | 5.1  | 3.2 | 7.0  | Brazil |
| Male   | 2012 | 7.2  | 5.0 | 9.4  | Brazil |
| Female | 1993 | 1.2  | 0.0 | 2.4  | Brazil |
| Female | 1994 | 1.6  | 0.2 | 3.0  | Brazil |
| Female | 1995 | 3.2  | 1.2 | 5.2  | Brazil |
| Female | 1996 | 3.3  | 1.3 | 5.3  | Brazil |
| Female | 1997 | 1.5  | 0.2 | 2.8  | Brazil |
| Female | 1998 | 1.8  | 0.5 | 3.1  | Brazil |
| Female | 1999 | 3.0  | 1.2 | 4.8  | Brazil |
| Female | 2000 | 2.0  | 0.7 | 3.3  | Brazil |
| Female | 2001 | 2.5  | 1.0 | 4.0  | Brazil |
| Female | 2002 | 2.2  | 0.8 | 3.6  | Brazil |
| Female | 2003 | 1.8  | 0.6 | 3.0  | Brazil |
| Female | 2004 | 2.3  | 0.9 | 3.7  | Brazil |
| Female | 2005 | 2.1  | 0.8 | 3.4  | Brazil |
| Female | 2006 | 2.5  | 1.1 | 3.9  | Brazil |
| Female | 2007 | 1.9  | 0.9 | 2.9  | Brazil |
| Female | 2008 | 1.9  | 0.8 | 3.0  | Brazil |
| Female | 2009 | 1.5  | 0.5 | 2.5  | Brazil |
| Female | 2010 | 0.8  | 0.2 | 1.4  | Brazil |
| Female | 2011 | 1.1  | 0.3 | 1.9  | Brazil |
| Female | 2012 | 1.2  | 0.4 | 2.0  | Brazil |
| Male   | 1998 | 11.8 | 6.5 | 17.1 | Chile  |
| Male   | 1999 | 8.5  | 4.2 | 12.8 | Chile  |
| Male   | 2000 | 10.6 | 5.8 | 15.4 | Chile  |
| Male   | 2001 | 7.0  | 3.2 | 10.8 | Chile  |
| Male   | 2002 | 8.3  | 4.1 | 12.5 | Chile  |
| Male   | 2003 | 9.3  | 5.1 | 13.5 | Chile  |
| Male   | 2004 | 7.4  | 3.7 | 11.1 | Chile  |
| Male   | 2005 | 7.9  | 3.9 | 11.9 | Chile  |
| Male   | 2006 | 5.7  | 2.6 | 8.8  | Chile  |
| Male   | 2007 | 4.8  | 2.1 | 7.5  | Chile  |

|        |      |     |     |      |          |
|--------|------|-----|-----|------|----------|
| Male   | 2008 | 6.8 | 3.4 | 10.2 | Chile    |
| Male   | 2009 | 5.8 | 2.8 | 8.8  | Chile    |
| Male   | 2010 | 7.1 | 3.8 | 10.4 | Chile    |
| Male   | 2011 | 7.7 | 4.3 | 11.1 | Chile    |
| Male   | 2012 | 7.2 | 4.0 | 10.4 | Chile    |
| Female | 1998 | 6.6 | 3.0 | 10.2 | Chile    |
| Female | 1999 | 6.9 | 3.3 | 10.5 | Chile    |
| Female | 2000 | 4.3 | 1.5 | 7.1  | Chile    |
| Female | 2001 | 2.9 | 0.6 | 5.2  | Chile    |
| Female | 2002 | 3.9 | 1.4 | 6.4  | Chile    |
| Female | 2003 | 3.4 | 1.3 | 5.5  | Chile    |
| Female | 2004 | 2.9 | 0.8 | 5.0  | Chile    |
| Female | 2005 | 6.1 | 3.3 | 8.9  | Chile    |
| Female | 2006 | 2.9 | 1.0 | 4.8  | Chile    |
| Female | 2007 | 1.9 | 0.2 | 3.6  | Chile    |
| Female | 2008 | 4.1 | 1.9 | 6.3  | Chile    |
| Female | 2009 | 1.8 | 0.4 | 3.2  | Chile    |
| Female | 2010 | 2.5 | 0.6 | 4.4  | Chile    |
| Female | 2011 | 2.8 | 1.1 | 4.5  | Chile    |
| Female | 2012 | 1.4 | 0.3 | 2.5  | Chile    |
| Male   | 1983 | 2.4 | 0.7 | 4.1  | Colombia |
| Male   | 1984 | 4.3 | 2.3 | 6.3  | Colombia |
| Male   | 1985 | 2.0 | 0.8 | 3.2  | Colombia |
| Male   | 1986 | 3.3 | 1.6 | 5.0  | Colombia |
| Male   | 1987 | 4.8 | 2.7 | 6.9  | Colombia |
| Male   | 1988 | 5.2 | 3.0 | 7.4  | Colombia |
| Male   | 1989 | 1.7 | 0.6 | 2.8  | Colombia |
| Male   | 1990 | 3.5 | 1.8 | 5.2  | Colombia |
| Male   | 1991 | 3.7 | 2.0 | 5.4  | Colombia |
| Male   | 1992 | 4.0 | 2.2 | 5.8  | Colombia |
| Male   | 1993 | 3.2 | 1.7 | 4.7  | Colombia |
| Male   | 1994 | 3.9 | 2.2 | 5.6  | Colombia |
| Male   | 1995 | 5.8 | 3.7 | 7.9  | Colombia |
| Male   | 1996 | 3.1 | 1.6 | 4.6  | Colombia |
| Male   | 1997 | 2.4 | 1.1 | 3.7  | Colombia |
| Male   | 1998 | 2.4 | 1.2 | 3.6  | Colombia |
| Male   | 1999 | 5.9 | 4.0 | 7.8  | Colombia |
| Male   | 2000 | 3.9 | 2.4 | 5.4  | Colombia |
| Male   | 2001 | 2.5 | 1.3 | 3.7  | Colombia |
| Male   | 2002 | 1.9 | 1.0 | 2.8  | Colombia |
| Male   | 2003 | 3.4 | 2.1 | 4.7  | Colombia |
| Male   | 2004 | 2.8 | 1.7 | 3.9  | Colombia |
| Male   | 2005 | 3.0 | 1.8 | 4.2  | Colombia |
| Male   | 2006 | 3.4 | 2.2 | 4.6  | Colombia |
| Male   | 2007 | 1.8 | 0.9 | 2.7  | Colombia |
| Male   | 2008 | 2.4 | 1.5 | 3.3  | Colombia |



|        |      |     |     |     |            |
|--------|------|-----|-----|-----|------------|
| Male   | 2009 | 1.6 | 0.8 | 2.4 | Colombia   |
| Male   | 2010 | 1.6 | 0.8 | 2.4 | Colombia   |
| Male   | 2011 | 1.6 | 0.8 | 2.4 | Colombia   |
| Male   | 2012 | 1.6 | 0.8 | 2.4 | Colombia   |
| Female | 1983 | 1.0 | 0.0 | 2.0 | Colombia   |
| Female | 1984 | 1.4 | 0.4 | 2.4 | Colombia   |
| Female | 1985 | 1.3 | 0.3 | 2.3 | Colombia   |
| Female | 1986 | 1.2 | 0.2 | 2.2 | Colombia   |
| Female | 1987 | 2.8 | 1.4 | 4.2 | Colombia   |
| Female | 1988 | 1.9 | 0.7 | 3.1 | Colombia   |
| Female | 1989 | 1.0 | 0.2 | 1.8 | Colombia   |
| Female | 1990 | 2.3 | 1.0 | 3.6 | Colombia   |
| Female | 1991 | 3.4 | 1.9 | 4.9 | Colombia   |
| Female | 1992 | 2.5 | 1.3 | 3.7 | Colombia   |
| Female | 1993 | 0.9 | 0.2 | 1.6 | Colombia   |
| Female | 1994 | 2.4 | 1.3 | 3.5 | Colombia   |
| Female | 1995 | 1.4 | 0.5 | 2.3 | Colombia   |
| Female | 1996 | 1.7 | 0.7 | 2.7 | Colombia   |
| Female | 1997 | 1.3 | 0.5 | 2.1 | Colombia   |
| Female | 1998 | 2.6 | 1.5 | 3.7 | Colombia   |
| Female | 1999 | 1.0 | 0.3 | 1.7 | Colombia   |
| Female | 2000 | 2.2 | 1.2 | 3.2 | Colombia   |
| Female | 2001 | 1.2 | 0.5 | 1.9 | Colombia   |
| Female | 2002 | 1.7 | 0.9 | 2.5 | Colombia   |
| Female | 2003 | 0.5 | 0.1 | 0.9 | Colombia   |
| Female | 2004 | 0.9 | 0.3 | 1.5 | Colombia   |
| Female | 2005 | 1.9 | 1.1 | 2.7 | Colombia   |
| Female | 2006 | 1.7 | 1.0 | 2.4 | Colombia   |
| Female | 2007 | 1.7 | 1.0 | 2.4 | Colombia   |
| Female | 2008 | 0.5 | 0.1 | 0.9 | Colombia   |
| Female | 2009 | 1.2 | 0.7 | 1.7 | Colombia   |
| Female | 2010 | 1.0 | 0.5 | 1.5 | Colombia   |
| Female | 2011 | 1.4 | 0.8 | 2.0 | Colombia   |
| Female | 2012 | 0.8 | 0.3 | 1.3 | Colombia   |
| Male   | 1982 | 2.7 | 1.5 | 3.9 | Costa Rica |
| Male   | 1983 | 3.8 | 2.4 | 5.2 | Costa Rica |
| Male   | 1984 | 3.7 | 2.4 | 5.0 | Costa Rica |
| Male   | 1985 | 4.2 | 2.8 | 5.6 | Costa Rica |
| Male   | 1986 | 2.1 | 1.2 | 3.0 | Costa Rica |
| Male   | 1987 | 3.1 | 2.0 | 4.2 | Costa Rica |
| Male   | 1988 | 2.8 | 1.8 | 3.8 | Costa Rica |
| Male   | 1989 | 3.5 | 2.3 | 4.7 | Costa Rica |
| Male   | 1990 | 2.8 | 1.8 | 3.8 | Costa Rica |
| Male   | 1991 | 3.3 | 2.2 | 4.4 | Costa Rica |
| Male   | 1992 | 2.3 | 1.4 | 3.2 | Costa Rica |
| Male   | 1993 | 2.7 | 1.7 | 3.7 | Costa Rica |

|        |      |     |     |     |            |
|--------|------|-----|-----|-----|------------|
| Male   | 1994 | 2.7 | 1.8 | 3.6 | Costa Rica |
| Male   | 1995 | 3.1 | 2.1 | 4.1 | Costa Rica |
| Male   | 1996 | 3.5 | 2.5 | 4.5 | Costa Rica |
| Male   | 1997 | 3.3 | 2.3 | 4.3 | Costa Rica |
| Male   | 1998 | 1.5 | 0.9 | 2.1 | Costa Rica |
| Male   | 1999 | 2.5 | 1.7 | 3.3 | Costa Rica |
| Male   | 2000 | 2.4 | 1.6 | 3.2 | Costa Rica |
| Male   | 2001 | 2.2 | 1.5 | 2.9 | Costa Rica |
| Male   | 2002 | 2.1 | 1.4 | 2.8 | Costa Rica |
| Male   | 2003 | 1.9 | 1.2 | 2.6 | Costa Rica |
| Male   | 2004 | 2.3 | 1.6 | 3.0 | Costa Rica |
| Male   | 2005 | 2.2 | 1.5 | 2.9 | Costa Rica |
| Male   | 2006 | 2.5 | 1.8 | 3.2 | Costa Rica |
| Male   | 2007 | 2.0 | 1.4 | 2.6 | Costa Rica |
| Male   | 2008 | 1.7 | 1.1 | 2.3 | Costa Rica |
| Male   | 2009 | 1.6 | 1.1 | 2.1 | Costa Rica |
| Male   | 2010 | 2.0 | 1.4 | 2.6 | Costa Rica |
| Male   | 2011 | 1.8 | 1.2 | 2.4 | Costa Rica |
| Female | 1982 | 1.1 | 0.3 | 1.9 | Costa Rica |
| Female | 1983 | 2.0 | 1.0 | 3.0 | Costa Rica |
| Female | 1984 | 1.3 | 0.5 | 2.1 | Costa Rica |
| Female | 1985 | 1.3 | 0.6 | 2.0 | Costa Rica |
| Female | 1986 | 0.7 | 0.2 | 1.2 | Costa Rica |
| Female | 1987 | 1.1 | 0.4 | 1.8 | Costa Rica |
| Female | 1988 | 2.0 | 1.1 | 2.9 | Costa Rica |
| Female | 1989 | 1.4 | 0.7 | 2.1 | Costa Rica |
| Female | 1990 | 0.8 | 0.2 | 1.4 | Costa Rica |
| Female | 1991 | 0.5 | 0.1 | 0.9 | Costa Rica |
| Female | 1992 | 1.2 | 0.5 | 1.9 | Costa Rica |
| Female | 1993 | 0.4 | 0.0 | 0.8 | Costa Rica |
| Female | 1994 | 1.1 | 0.5 | 1.7 | Costa Rica |
| Female | 1995 | 1.4 | 0.8 | 2.0 | Costa Rica |
| Female | 1996 | 1.1 | 0.6 | 1.6 | Costa Rica |
| Female | 1997 | 1.0 | 0.5 | 1.5 | Costa Rica |
| Female | 1998 | 0.6 | 0.2 | 1.0 | Costa Rica |
| Female | 1999 | 0.7 | 0.3 | 1.1 | Costa Rica |
| Female | 2000 | 0.9 | 0.4 | 1.4 | Costa Rica |
| Female | 2001 | 0.7 | 0.3 | 1.1 | Costa Rica |
| Female | 2002 | 0.4 | 0.1 | 0.7 | Costa Rica |
| Female | 2003 | 0.8 | 0.4 | 1.2 | Costa Rica |
| Female | 2004 | 0.6 | 0.3 | 0.9 | Costa Rica |
| Female | 2005 | 0.6 | 0.3 | 0.9 | Costa Rica |
| Female | 2006 | 0.6 | 0.3 | 0.9 | Costa Rica |
| Female | 2007 | 0.4 | 0.1 | 0.7 | Costa Rica |
| Female | 2008 | 0.5 | 0.2 | 0.8 | Costa Rica |
| Female | 2009 | 0.8 | 0.5 | 1.1 | Costa Rica |

|        |      |     |       |     |            |
|--------|------|-----|-------|-----|------------|
| Female | 2010 | 0.7 | 0.4   | 1.0 | Costa Rica |
| Female | 2011 | 0.4 | 0.2   | 0.6 | Costa Rica |
| Male   | 1985 | 4.7 | 2.1   | 7.3 | Ecuador    |
| Male   | 1986 | 3.6 | 1.5   | 5.7 | Ecuador    |
| Male   | 1987 | 3.8 | 1.6   | 6.0 | Ecuador    |
| Male   | 1988 | 3.3 | 1.3   | 5.3 | Ecuador    |
| Male   | 1989 | 2.2 | 0.6   | 3.8 | Ecuador    |
| Male   | 1990 | 4.8 | 2.2   | 7.4 | Ecuador    |
| Male   | 1991 | 2.3 | 0.7   | 3.9 | Ecuador    |
| Male   | 1992 | 3.7 | 1.6   | 5.8 | Ecuador    |
| Male   | 1993 | 2.8 | 1.1   | 4.5 | Ecuador    |
| Male   | 1994 | 3.0 | 1.2   | 4.8 | Ecuador    |
| Male   | 1995 | 1.1 | 0.1   | 2.1 | Ecuador    |
| Male   | 1996 | 2.4 | 0.9   | 3.9 | Ecuador    |
| Male   | 1997 | 3.9 | 2.1   | 5.7 | Ecuador    |
| Male   | 1998 | 1.8 | 0.7   | 2.9 | Ecuador    |
| Male   | 1999 | 2.5 | 1.1   | 3.9 | Ecuador    |
| Male   | 2000 | 1.1 | 0.2   | 2.0 | Ecuador    |
| Male   | 2001 | 2.5 | 1.2   | 3.8 | Ecuador    |
| Male   | 2002 | 2.0 | 0.9   | 3.1 | Ecuador    |
| Male   | 2003 | 1.1 | 0.3   | 1.9 | Ecuador    |
| Male   | 2004 | 2.1 | 0.9   | 3.3 | Ecuador    |
| Male   | 2005 | 3.3 | 2.0   | 4.6 | Ecuador    |
| Male   | 2006 | 2.4 | 1.2   | 3.6 | Ecuador    |
| Male   | 2007 | 2.1 | 1.0   | 3.2 | Ecuador    |
| Male   | 2008 | 2.7 | 1.5   | 3.9 | Ecuador    |
| Male   | 2009 | 2.0 | 0.9   | 3.1 | Ecuador    |
| Male   | 2010 | 1.7 | 0.8   | 2.6 | Ecuador    |
| Male   | 2011 | 0.7 | 0.1   | 1.3 | Ecuador    |
| Male   | 2012 | 1.6 | 0.7   | 2.5 | Ecuador    |
| Female | 1985 | 0.9 | (0.1) | 1.9 | Ecuador    |
| Female | 1987 | 0.5 | (0.2) | 1.2 | Ecuador    |
| Female | 1988 | 0.8 | 0.0   | 1.6 | Ecuador    |
| Female | 1989 | 1.3 | 0.3   | 2.3 | Ecuador    |
| Female | 1990 | 0.8 | (0.1) | 1.7 | Ecuador    |
| Female | 1991 | 0.6 | (0.1) | 1.3 | Ecuador    |
| Female | 1992 | 1.8 | 0.6   | 3.0 | Ecuador    |
| Female | 1993 | 1.7 | 0.5   | 2.9 | Ecuador    |
| Female | 1994 | 0.5 | (0.1) | 1.1 | Ecuador    |
| Female | 1995 | 0.3 | (0.1) | 0.7 | Ecuador    |
| Female | 1996 | 0.5 | (0.2) | 1.2 | Ecuador    |
| Female | 1997 | 1.1 | 0.3   | 1.9 | Ecuador    |
| Female | 1998 | 0.6 | 0.0   | 1.2 | Ecuador    |
| Female | 1999 | 0.6 | 0.1   | 1.1 | Ecuador    |
| Female | 2000 | 1.0 | 0.2   | 1.8 | Ecuador    |
| Female | 2001 | 1.1 | 0.2   | 2.0 | Ecuador    |

|        |      |     |       |     |         |
|--------|------|-----|-------|-----|---------|
| Female | 2002 | 0.4 | (0.1) | 0.9 | Ecuador |
| Female | 2003 | 0.8 | 0.1   | 1.5 | Ecuador |
| Female | 2004 | 1.1 | 0.3   | 1.9 | Ecuador |
| Female | 2005 | 0.7 | 0.0   | 1.4 | Ecuador |
| Female | 2006 | 0.4 | 0.0   | 0.8 | Ecuador |
| Female | 2007 | 0.4 | (0.1) | 0.9 | Ecuador |
| Female | 2008 | 0.8 | 0.2   | 1.4 | Ecuador |
| Female | 2009 | 0.8 | 0.2   | 1.4 | Ecuador |
| Female | 2010 | 0.8 | 0.2   | 1.4 | Ecuador |
| Female | 2011 | 0.6 | 0.1   | 1.1 | Ecuador |
| Female | 2012 | 1.0 | 0.3   | 1.7 | Ecuador |
| Male   | 1983 | 3.9 | 3.5   | 4.3 | Canada  |
| Male   | 1984 | 4.0 | 3.6   | 4.4 | Canada  |
| Male   | 1985 | 4.1 | 3.7   | 4.5 | Canada  |
| Male   | 1986 | 4.0 | 3.6   | 4.4 | Canada  |
| Male   | 1987 | 4.4 | 4.0   | 4.8 | Canada  |
| Male   | 1988 | 3.9 | 3.6   | 4.2 | Canada  |
| Male   | 1989 | 3.9 | 3.6   | 4.2 | Canada  |
| Male   | 1990 | 3.9 | 3.6   | 4.2 | Canada  |
| Male   | 1991 | 4.3 | 3.9   | 4.7 | Canada  |
| Male   | 1992 | 4.4 | 4.0   | 4.8 | Canada  |
| Male   | 1993 | 4.1 | 3.8   | 4.4 | Canada  |
| Male   | 1994 | 4.3 | 4.0   | 4.6 | Canada  |
| Male   | 1995 | 4.1 | 3.8   | 4.4 | Canada  |
| Male   | 1996 | 4.2 | 3.9   | 4.5 | Canada  |
| Male   | 1997 | 4.4 | 4.1   | 4.7 | Canada  |
| Male   | 1998 | 4.3 | 4.0   | 4.6 | Canada  |
| Male   | 1999 | 4.5 | 4.2   | 4.8 | Canada  |
| Male   | 2000 | 4.5 | 4.2   | 4.8 | Canada  |
| Male   | 2001 | 4.1 | 3.8   | 4.4 | Canada  |
| Male   | 2002 | 4.3 | 4.0   | 4.6 | Canada  |
| Male   | 2003 | 4.6 | 4.3   | 4.9 | Canada  |
| Male   | 2004 | 4.4 | 4.1   | 4.7 | Canada  |
| Male   | 2005 | 4.3 | 4.0   | 4.6 | Canada  |
| Male   | 2006 | 4.4 | 4.1   | 4.7 | Canada  |
| Male   | 2007 | 4.6 | 4.3   | 4.9 | Canada  |
| Male   | 2008 | 4.8 | 4.5   | 5.1 | Canada  |
| Male   | 2009 | 5.0 | 4.7   | 5.3 | Canada  |
| Male   | 2010 | 4.9 | 4.6   | 5.2 | Canada  |
| Male   | 2011 | 4.7 | 4.4   | 5.0 | Canada  |
| Male   | 2012 | 5.1 | 4.8   | 5.4 | Canada  |
| Female | 1983 | 1.3 | 1.1   | 1.5 | Canada  |
| Female | 1984 | 1.2 | 1.0   | 1.4 | Canada  |
| Female | 1985 | 1.4 | 1.2   | 1.6 | Canada  |
| Female | 1986 | 1.3 | 1.1   | 1.5 | Canada  |
| Female | 1987 | 1.3 | 1.1   | 1.5 | Canada  |

|        |      |     |       |      |         |
|--------|------|-----|-------|------|---------|
| Female | 1988 | 1.3 | 1.1   | 1.5  | Canada  |
| Female | 1989 | 1.4 | 1.2   | 1.6  | Canada  |
| Female | 1990 | 1.3 | 1.1   | 1.5  | Canada  |
| Female | 1991 | 1.4 | 1.2   | 1.6  | Canada  |
| Female | 1992 | 1.3 | 1.1   | 1.5  | Canada  |
| Female | 1993 | 1.3 | 1.1   | 1.5  | Canada  |
| Female | 1994 | 1.3 | 1.1   | 1.5  | Canada  |
| Female | 1995 | 1.3 | 1.1   | 1.5  | Canada  |
| Female | 1996 | 1.5 | 1.3   | 1.7  | Canada  |
| Female | 1997 | 1.4 | 1.2   | 1.6  | Canada  |
| Female | 1998 | 1.2 | 1.1   | 1.3  | Canada  |
| Female | 1999 | 1.3 | 1.1   | 1.5  | Canada  |
| Female | 2000 | 1.3 | 1.2   | 1.4  | Canada  |
| Female | 2001 | 1.2 | 1.1   | 1.3  | Canada  |
| Female | 2002 | 1.3 | 1.2   | 1.4  | Canada  |
| Female | 2003 | 1.3 | 1.2   | 1.4  | Canada  |
| Female | 2004 | 1.2 | 1.1   | 1.3  | Canada  |
| Female | 2005 | 1.2 | 1.1   | 1.3  | Canada  |
| Female | 2006 | 1.2 | 1.1   | 1.3  | Canada  |
| Female | 2007 | 1.2 | 1.1   | 1.3  | Canada  |
| Female | 2008 | 1.1 | 1.0   | 1.2  | Canada  |
| Female | 2009 | 1.4 | 1.3   | 1.5  | Canada  |
| Female | 2010 | 1.2 | 1.1   | 1.3  | Canada  |
| Female | 2011 | 1.2 | 1.1   | 1.3  | Canada  |
| Female | 2012 | 1.2 | 1.1   | 1.3  | Canada  |
| Male   | 1998 | 3.7 | 0.1   | 7.3  | Bahrain |
| Male   | 1999 | 3.4 | 0.1   | 6.7  | Bahrain |
| Male   | 2000 | 1.8 | (0.7) | 4.3  | Bahrain |
| Male   | 2001 | 3.6 | 0.1   | 7.1  | Bahrain |
| Male   | 2002 | 9.3 | 3.5   | 15.1 | Bahrain |
| Male   | 2003 | 5.3 | 1.1   | 9.5  | Bahrain |
| Male   | 2004 | 4.9 | 1.0   | 8.8  | Bahrain |
| Male   | 2005 | 2.3 | (0.3) | 4.9  | Bahrain |
| Male   | 2006 | 2.9 | 0.1   | 5.7  | Bahrain |
| Male   | 2007 | 2.0 | (0.3) | 4.3  | Bahrain |
| Male   | 2008 | 2.4 | 0.0   | 4.8  | Bahrain |
| Male   | 2009 | 1.9 | (0.3) | 4.1  | Bahrain |
| Male   | 2010 | 0.4 | (0.4) | 1.2  | Bahrain |
| Male   | 2011 | 1.9 | 0.0   | 3.8  | Bahrain |
| Male   | 2012 | 1.5 | 0.0   | 3.0  | Bahrain |
| Female | 1998 | 1.1 | (1.1) | 3.3  | Bahrain |
| Female | 1999 | 1.0 | (1.0) | 3.0  | Bahrain |
| Female | 2000 | 1.0 | (1.0) | 3.0  | Bahrain |
| Female | 2001 | 3.1 | 0.1   | 6.1  | Bahrain |
| Female | 2002 | 2.8 | (0.4) | 6.0  | Bahrain |
| Female | 2003 | 0.9 | (0.9) | 2.7  | Bahrain |

|        |      |      |       |      |                  |
|--------|------|------|-------|------|------------------|
| Female | 2004 | 1.2  | (0.5) | 2.9  | Bahrain          |
| Female | 2005 | 3.3  | 0.1   | 6.5  | Bahrain          |
| Female | 2006 | 2.5  | (0.3) | 5.3  | Bahrain          |
| Female | 2008 | 0.7  | (0.7) | 2.1  | Bahrain          |
| Female | 2009 | 0.5  | (0.5) | 1.5  | Bahrain          |
| Female | 2010 | 1.1  | (0.4) | 2.6  | Bahrain          |
| Female | 2011 | 1.9  | 0.0   | 3.8  | Bahrain          |
| Female | 2012 | 0.3  | (0.3) | 0.9  | Bahrain          |
| Male   | 1998 | 10.3 | 9.7   | 10.9 | China            |
| Male   | 1999 | 10.3 | 9.7   | 10.9 | China            |
| Male   | 2000 | 10.3 | 9.7   | 10.9 | China            |
| Male   | 2001 | 10.3 | 9.7   | 10.9 | China            |
| Male   | 2002 | 9.7  | 9.1   | 10.3 | China            |
| Male   | 2003 | 8.2  | 7.7   | 8.7  | China            |
| Male   | 2004 | 8.4  | 7.9   | 8.9  | China            |
| Male   | 2005 | 7.9  | 7.4   | 8.4  | China            |
| Male   | 2006 | 8.0  | 7.5   | 8.5  | China            |
| Male   | 2007 | 7.4  | 6.9   | 7.9  | China            |
| Male   | 2008 | 7.2  | 6.8   | 7.6  | China            |
| Male   | 2009 | 6.6  | 6.2   | 7.0  | China            |
| Male   | 2010 | 6.8  | 6.4   | 7.2  | China            |
| Male   | 2011 | 6.5  | 6.1   | 6.9  | China            |
| Male   | 2012 | 6.7  | 6.3   | 7.1  | China            |
| Female | 1998 | 2.9  | 2.6   | 3.2  | China            |
| Female | 1999 | 2.1  | 1.9   | 2.3  | China            |
| Female | 2000 | 2.4  | 2.1   | 2.7  | China            |
| Female | 2001 | 2.5  | 2.2   | 2.8  | China            |
| Female | 2002 | 2.1  | 1.9   | 2.3  | China            |
| Female | 2003 | 2.0  | 1.8   | 2.2  | China            |
| Female | 2004 | 2.0  | 1.8   | 2.2  | China            |
| Female | 2005 | 1.8  | 1.6   | 2.0  | China            |
| Female | 2006 | 1.7  | 1.5   | 1.9  | China            |
| Female | 2007 | 1.7  | 1.5   | 1.9  | China            |
| Female | 2008 | 1.5  | 1.3   | 1.7  | China            |
| Female | 2009 | 1.4  | 1.2   | 1.6  | China            |
| Female | 2010 | 1.2  | 1.1   | 1.3  | China            |
| Female | 2011 | 1.2  | 1.1   | 1.3  | China            |
| Female | 2012 | 1.1  | 1.0   | 1.2  | China            |
| Male   | 1983 | 19.2 | 17.5  | 20.9 | Hong Kong, China |
| Male   | 1984 | 18.4 | 16.7  | 20.1 | Hong Kong, China |
| Male   | 1985 | 18.9 | 17.2  | 20.6 | Hong Kong, China |
| Male   | 1986 | 17.9 | 16.3  | 19.5 | Hong Kong, China |
| Male   | 1987 | 16.1 | 14.6  | 17.6 | Hong Kong, China |
| Male   | 1988 | 15.0 | 13.6  | 16.4 | Hong Kong, China |
| Male   | 1989 | 14.1 | 12.8  | 15.4 | Hong Kong, China |
| Male   | 1990 | 15.5 | 14.1  | 16.9 | Hong Kong, China |

|        |      |      |      |      |                  |
|--------|------|------|------|------|------------------|
| Male   | 1991 | 13.0 | 11.7 | 14.3 | Hong Kong, China |
| Male   | 1992 | 13.3 | 12.0 | 14.6 | Hong Kong, China |
| Male   | 1993 | 13.8 | 12.5 | 15.1 | Hong Kong, China |
| Male   | 1994 | 12.3 | 11.1 | 13.5 | Hong Kong, China |
| Male   | 1995 | 11.7 | 10.6 | 12.8 | Hong Kong, China |
| Male   | 1996 | 10.7 | 9.7  | 11.7 | Hong Kong, China |
| Male   | 1997 | 10.4 | 9.4  | 11.4 | Hong Kong, China |
| Male   | 1998 | 9.8  | 8.8  | 10.8 | Hong Kong, China |
| Male   | 1999 | 9.2  | 8.3  | 10.1 | Hong Kong, China |
| Male   | 2000 | 10.0 | 9.1  | 10.9 | Hong Kong, China |
| Male   | 2001 | 9.8  | 8.9  | 10.7 | Hong Kong, China |
| Male   | 2002 | 8.4  | 7.6  | 9.2  | Hong Kong, China |
| Male   | 2003 | 7.7  | 6.9  | 8.5  | Hong Kong, China |
| Male   | 2004 | 7.3  | 6.5  | 8.1  | Hong Kong, China |
| Male   | 2005 | 7.2  | 6.5  | 7.9  | Hong Kong, China |
| Male   | 2006 | 7.1  | 6.4  | 7.8  | Hong Kong, China |
| Male   | 2007 | 6.2  | 5.5  | 6.9  | Hong Kong, China |
| Male   | 2008 | 6.6  | 5.9  | 7.3  | Hong Kong, China |
| Male   | 2009 | 6.1  | 5.5  | 6.7  | Hong Kong, China |
| Male   | 2010 | 6.0  | 5.4  | 6.6  | Hong Kong, China |
| Male   | 2011 | 5.4  | 4.8  | 6.0  | Hong Kong, China |
| Male   | 2012 | 5.2  | 4.6  | 5.8  | Hong Kong, China |
| Female | 1983 | 3.8  | 3.1  | 4.5  | Hong Kong, China |
| Female | 1984 | 3.7  | 3.0  | 4.4  | Hong Kong, China |
| Female | 1985 | 4.1  | 3.4  | 4.8  | Hong Kong, China |
| Female | 1986 | 3.2  | 2.6  | 3.8  | Hong Kong, China |
| Female | 1987 | 3.3  | 2.7  | 3.9  | Hong Kong, China |
| Female | 1988 | 3.5  | 2.9  | 4.1  | Hong Kong, China |
| Female | 1989 | 3.0  | 2.4  | 3.6  | Hong Kong, China |
| Female | 1990 | 3.1  | 2.5  | 3.7  | Hong Kong, China |
| Female | 1991 | 3.3  | 2.7  | 3.9  | Hong Kong, China |
| Female | 1992 | 2.9  | 2.4  | 3.4  | Hong Kong, China |
| Female | 1993 | 2.7  | 2.2  | 3.2  | Hong Kong, China |
| Female | 1994 | 3.0  | 2.5  | 3.5  | Hong Kong, China |
| Female | 1995 | 2.8  | 2.3  | 3.3  | Hong Kong, China |
| Female | 1996 | 2.0  | 1.6  | 2.4  | Hong Kong, China |
| Female | 1997 | 2.2  | 1.8  | 2.6  | Hong Kong, China |
| Female | 1998 | 1.9  | 1.5  | 2.3  | Hong Kong, China |
| Female | 1999 | 1.6  | 1.3  | 1.9  | Hong Kong, China |
| Female | 2000 | 2.0  | 1.6  | 2.4  | Hong Kong, China |
| Female | 2001 | 1.6  | 1.3  | 1.9  | Hong Kong, China |
| Female | 2002 | 1.5  | 1.2  | 1.8  | Hong Kong, China |
| Female | 2003 | 1.5  | 1.2  | 1.8  | Hong Kong, China |
| Female | 2004 | 1.7  | 1.4  | 2.0  | Hong Kong, China |
| Female | 2005 | 1.8  | 1.4  | 2.2  | Hong Kong, China |
| Female | 2006 | 1.6  | 1.3  | 1.9  | Hong Kong, China |

|        |      |      |     |      |                  |
|--------|------|------|-----|------|------------------|
| Female | 2007 | 1.3  | 1.0 | 1.6  | Hong Kong, China |
| Female | 2008 | 1.2  | 1.0 | 1.4  | Hong Kong, China |
| Female | 2009 | 0.9  | 0.7 | 1.1  | Hong Kong, China |
| Female | 2010 | 1.1  | 0.9 | 1.3  | Hong Kong, China |
| Female | 2011 | 1.0  | 0.8 | 1.2  | Hong Kong, China |
| Female | 2012 | 0.9  | 0.7 | 1.1  | Hong Kong, China |
| Male   | 1983 | 5.6  | 4.2 | 7.0  | India            |
| Male   | 1984 | 7.0  | 5.5 | 8.5  | India            |
| Male   | 1985 | 7.0  | 5.5 | 8.5  | India            |
| Male   | 1986 | 6.6  | 5.2 | 8.0  | India            |
| Male   | 1987 | 8.8  | 7.2 | 10.4 | India            |
| Male   | 1988 | 8.5  | 6.9 | 10.1 | India            |
| Male   | 1989 | 8.6  | 7.1 | 10.1 | India            |
| Male   | 1990 | 9.4  | 7.8 | 11.0 | India            |
| Male   | 1991 | 10.4 | 8.7 | 12.1 | India            |
| Male   | 1992 | 8.7  | 7.2 | 10.2 | India            |
| Male   | 1993 | 8.5  | 7.0 | 10.0 | India            |
| Male   | 1994 | 8.7  | 7.2 | 10.2 | India            |
| Male   | 1995 | 8.8  | 7.3 | 10.3 | India            |
| Male   | 1996 | 7.4  | 6.1 | 8.7  | India            |
| Male   | 1997 | 9.3  | 7.8 | 10.8 | India            |
| Male   | 1998 | 8.8  | 7.4 | 10.2 | India            |
| Male   | 1999 | 9.1  | 7.7 | 10.5 | India            |
| Male   | 2000 | 9.5  | 8.1 | 10.9 | India            |
| Male   | 2001 | 9.2  | 7.8 | 10.6 | India            |
| Male   | 2002 | 8.9  | 7.5 | 10.3 | India            |
| Male   | 2003 | 7.4  | 6.2 | 8.6  | India            |
| Male   | 2004 | 8.1  | 6.8 | 9.4  | India            |
| Male   | 2005 | 8.1  | 6.8 | 9.4  | India            |
| Male   | 2006 | 7.9  | 6.7 | 9.1  | India            |
| Male   | 2007 | 8.3  | 7.1 | 9.5  | India            |
| Male   | 2008 | 7.5  | 6.3 | 8.7  | India            |
| Male   | 2009 | 6.4  | 5.3 | 7.5  | India            |
| Male   | 2010 | 5.1  | 4.2 | 6.0  | India            |
| Male   | 2011 | 6.7  | 5.6 | 7.8  | India            |
| Male   | 2012 | 4.7  | 3.8 | 5.6  | India            |
| Female | 1983 | 5.3  | 4.0 | 6.6  | India            |
| Female | 1984 | 5.6  | 4.3 | 6.9  | India            |
| Female | 1985 | 5.2  | 3.9 | 6.5  | India            |
| Female | 1986 | 6.9  | 5.5 | 8.3  | India            |
| Female | 1987 | 5.7  | 4.4 | 7.0  | India            |
| Female | 1988 | 6.4  | 5.0 | 7.8  | India            |
| Female | 1989 | 6.8  | 5.4 | 8.2  | India            |
| Female | 1990 | 5.8  | 4.5 | 7.1  | India            |
| Female | 1991 | 6.5  | 5.1 | 7.9  | India            |
| Female | 1992 | 5.6  | 4.4 | 6.8  | India            |



|        |      |     |     |     |        |
|--------|------|-----|-----|-----|--------|
| Female | 1993 | 4.8 | 3.7 | 5.9 | India  |
| Female | 1994 | 5.9 | 4.7 | 7.1 | India  |
| Female | 1995 | 6.5 | 5.2 | 7.8 | India  |
| Female | 1996 | 7.1 | 5.8 | 8.4 | India  |
| Female | 1997 | 5.7 | 4.5 | 6.9 | India  |
| Female | 1998 | 6.4 | 5.2 | 7.6 | India  |
| Female | 1999 | 5.2 | 4.1 | 6.3 | India  |
| Female | 2000 | 6.1 | 4.9 | 7.3 | India  |
| Female | 2001 | 5.1 | 4.1 | 6.1 | India  |
| Female | 2002 | 4.5 | 3.5 | 5.5 | India  |
| Female | 2003 | 4.0 | 3.1 | 4.9 | India  |
| Female | 2004 | 5.4 | 4.4 | 6.4 | India  |
| Female | 2005 | 4.8 | 3.8 | 5.8 | India  |
| Female | 2006 | 5.1 | 4.1 | 6.1 | India  |
| Female | 2007 | 4.3 | 3.4 | 5.2 | India  |
| Female | 2008 | 3.8 | 3.0 | 4.6 | India  |
| Female | 2009 | 4.0 | 3.2 | 4.8 | India  |
| Female | 2010 | 4.1 | 3.3 | 4.9 | India  |
| Female | 2011 | 4.1 | 3.3 | 4.9 | India  |
| Female | 2012 | 3.7 | 2.9 | 4.5 | India  |
| Male   | 1963 | 2.4 | 1.4 | 3.4 | Israel |
| Male   | 1964 | 2.6 | 1.6 | 3.6 | Israel |
| Male   | 1965 | 2.2 | 1.3 | 3.1 | Israel |
| Male   | 1966 | 2.3 | 1.4 | 3.2 | Israel |
| Male   | 1967 | 2.2 | 1.4 | 3.0 | Israel |
| Male   | 1968 | 1.7 | 1.0 | 2.4 | Israel |
| Male   | 1969 | 2.4 | 1.6 | 3.2 | Israel |
| Male   | 1970 | 2.2 | 1.4 | 3.0 | Israel |
| Male   | 1971 | 1.8 | 1.1 | 2.5 | Israel |
| Male   | 1972 | 1.7 | 1.0 | 2.4 | Israel |
| Male   | 1973 | 1.8 | 1.1 | 2.5 | Israel |
| Male   | 1974 | 2.1 | 1.4 | 2.8 | Israel |
| Male   | 1975 | 2.5 | 1.8 | 3.2 | Israel |
| Male   | 1976 | 1.9 | 1.3 | 2.5 | Israel |
| Male   | 1977 | 1.7 | 1.1 | 2.3 | Israel |
| Male   | 1978 | 1.9 | 1.3 | 2.5 | Israel |
| Male   | 1979 | 1.7 | 1.1 | 2.3 | Israel |
| Male   | 1980 | 1.5 | 1.0 | 2.0 | Israel |
| Male   | 1981 | 1.6 | 1.1 | 2.1 | Israel |
| Male   | 1982 | 1.3 | 0.8 | 1.8 | Israel |
| Male   | 1983 | 1.7 | 1.1 | 2.3 | Israel |
| Male   | 1984 | 1.1 | 0.7 | 1.5 | Israel |
| Male   | 1985 | 1.8 | 1.3 | 2.3 | Israel |
| Male   | 1986 | 0.9 | 0.5 | 1.3 | Israel |
| Male   | 1987 | 1.3 | 0.9 | 1.7 | Israel |
| Male   | 1988 | 1.5 | 1.0 | 2.0 | Israel |

|        |      |     |     |     |        |
|--------|------|-----|-----|-----|--------|
| Female | 1963 | 2.7 | 1.7 | 3.7 | Israel |
| Female | 1964 | 1.3 | 0.6 | 2.0 | Israel |
| Female | 1965 | 1.2 | 0.6 | 1.8 | Israel |
| Female | 1966 | 1.9 | 1.1 | 2.7 | Israel |
| Female | 1967 | 1.8 | 1.1 | 2.5 | Israel |
| Female | 1968 | 1.4 | 0.8 | 2.0 | Israel |
| Female | 1969 | 1.7 | 1.0 | 2.4 | Israel |
| Female | 1970 | 1.7 | 1.0 | 2.4 | Israel |
| Female | 1971 | 2.2 | 1.5 | 2.9 | Israel |
| Female | 1972 | 1.2 | 0.7 | 1.7 | Israel |
| Female | 1973 | 1.4 | 0.8 | 2.0 | Israel |
| Female | 1974 | 1.2 | 0.7 | 1.7 | Israel |
| Female | 1975 | 1.4 | 0.9 | 1.9 | Israel |
| Female | 1976 | 1.6 | 1.0 | 2.2 | Israel |
| Female | 1977 | 2.0 | 1.4 | 2.6 | Israel |
| Female | 1978 | 0.9 | 0.5 | 1.3 | Israel |
| Female | 1979 | 0.9 | 0.5 | 1.3 | Israel |
| Female | 1980 | 1.4 | 0.9 | 1.9 | Israel |
| Female | 1981 | 1.0 | 0.6 | 1.4 | Israel |
| Female | 1982 | 1.1 | 0.7 | 1.5 | Israel |
| Female | 1983 | 1.1 | 0.7 | 1.5 | Israel |
| Female | 1984 | 1.2 | 0.8 | 1.6 | Israel |
| Female | 1985 | 0.8 | 0.5 | 1.1 | Israel |
| Female | 1986 | 1.0 | 0.7 | 1.3 | Israel |
| Female | 1987 | 0.7 | 0.4 | 1.0 | Israel |
| Female | 1988 | 1.0 | 0.6 | 1.4 | Israel |
| Female | 1989 | 1.2 | 0.8 | 1.6 | Israel |
| Female | 1990 | 1.2 | 0.8 | 1.6 | Israel |
| Female | 1991 | 0.9 | 0.6 | 1.2 | Israel |
| Female | 1992 | 0.9 | 0.6 | 1.2 | Israel |
| Female | 1993 | 1.0 | 0.7 | 1.3 | Israel |
| Female | 1994 | 1.1 | 0.8 | 1.4 | Israel |
| Female | 1995 | 1.2 | 0.8 | 1.6 | Israel |
| Female | 1996 | 1.2 | 0.9 | 1.5 | Israel |
| Female | 1997 | 1.1 | 0.8 | 1.4 | Israel |
| Female | 1998 | 0.8 | 0.6 | 1.0 | Israel |
| Female | 1999 | 0.9 | 0.6 | 1.2 | Israel |
| Female | 2000 | 1.1 | 0.8 | 1.4 | Israel |
| Female | 2001 | 1.0 | 0.7 | 1.3 | Israel |
| Female | 2002 | 0.8 | 0.6 | 1.0 | Israel |
| Female | 2003 | 0.6 | 0.4 | 0.8 | Israel |
| Female | 2004 | 1.1 | 0.8 | 1.4 | Israel |
| Female | 2005 | 1.0 | 0.7 | 1.3 | Israel |
| Female | 2006 | 0.9 | 0.7 | 1.1 | Israel |
| Female | 2007 | 1.0 | 0.7 | 1.3 | Israel |
| Female | 2008 | 0.9 | 0.7 | 1.1 | Israel |

|        |      |      |      |      |                   |
|--------|------|------|------|------|-------------------|
| Female | 2009 | 0.7  | 0.5  | 0.9  | Israel            |
| Female | 2010 | 0.8  | 0.6  | 1.0  | Israel            |
| Female | 2011 | 0.8  | 0.6  | 1.0  | Israel            |
| Female | 2012 | 0.8  | 0.6  | 1.0  | Israel            |
| Male   | 1998 | 11.7 | 11.1 | 12.3 | Japan             |
| Male   | 1999 | 12.2 | 11.6 | 12.8 | Japan             |
| Male   | 2000 | 12.0 | 11.4 | 12.6 | Japan             |
| Male   | 2001 | 12.2 | 11.6 | 12.8 | Japan             |
| Male   | 2002 | 11.7 | 11.1 | 12.3 | Japan             |
| Male   | 2003 | 12.0 | 11.4 | 12.6 | Japan             |
| Male   | 2004 | 11.8 | 11.2 | 12.4 | Japan             |
| Male   | 2005 | 12.5 | 11.9 | 13.1 | Japan             |
| Male   | 2006 | 12.6 | 12.0 | 13.2 | Japan             |
| Male   | 2007 | 13.0 | 12.4 | 13.6 | Japan             |
| Male   | 2008 | 12.2 | 11.6 | 12.8 | Japan             |
| Male   | 2009 | 12.8 | 12.2 | 13.4 | Japan             |
| Male   | 2010 | 13.5 | 12.9 | 14.1 | Japan             |
| Female | 1998 | 1.7  | 1.5  | 1.9  | Japan             |
| Female | 1999 | 1.8  | 1.6  | 2.0  | Japan             |
| Female | 2000 | 1.7  | 1.5  | 1.9  | Japan             |
| Female | 2001 | 1.8  | 1.6  | 2.0  | Japan             |
| Female | 2002 | 1.9  | 1.7  | 2.1  | Japan             |
| Female | 2003 | 2.1  | 1.9  | 2.3  | Japan             |
| Female | 2004 | 1.8  | 1.6  | 2.0  | Japan             |
| Female | 2005 | 1.8  | 1.6  | 2.0  | Japan             |
| Female | 2006 | 2.0  | 1.8  | 2.2  | Japan             |
| Female | 2007 | 2.1  | 1.9  | 2.3  | Japan             |
| Female | 2008 | 2.0  | 1.8  | 2.2  | Japan             |
| Female | 2009 | 2.2  | 2.0  | 2.4  | Japan             |
| Female | 2010 | 2.3  | 2.1  | 2.5  | Japan             |
| Male   | 1999 | 7.3  | 6.7  | 7.9  | Republic of Korea |
| Male   | 2000 | 7.2  | 6.6  | 7.8  | Republic of Korea |
| Male   | 2001 | 7.5  | 6.9  | 8.1  | Republic of Korea |
| Male   | 2002 | 7.3  | 6.7  | 7.9  | Republic of Korea |
| Male   | 2003 | 6.8  | 6.2  | 7.4  | Republic of Korea |
| Male   | 2004 | 6.4  | 5.9  | 6.9  | Republic of Korea |
| Male   | 2005 | 6.1  | 5.6  | 6.6  | Republic of Korea |
| Male   | 2006 | 5.6  | 5.1  | 6.1  | Republic of Korea |
| Male   | 2007 | 5.9  | 5.4  | 6.4  | Republic of Korea |
| Male   | 2008 | 6.0  | 5.5  | 6.5  | Republic of Korea |
| Male   | 2009 | 5.9  | 5.4  | 6.4  | Republic of Korea |
| Male   | 2010 | 6.1  | 5.6  | 6.6  | Republic of Korea |
| Male   | 2011 | 5.7  | 5.3  | 6.1  | Republic of Korea |
| Male   | 2012 | 5.9  | 5.5  | 6.3  | Republic of Korea |
| Female | 1999 | 0.6  | 0.4  | 0.8  | Republic of Korea |
| Female | 2000 | 0.5  | 0.4  | 0.6  | Republic of Korea |

|        |      |     |     |     |                   |
|--------|------|-----|-----|-----|-------------------|
| Female | 2001 | 0.7 | 0.5 | 0.9 | Republic of Korea |
| Female | 2002 | 0.6 | 0.4 | 0.8 | Republic of Korea |
| Female | 2003 | 0.5 | 0.4 | 0.6 | Republic of Korea |
| Female | 2004 | 0.5 | 0.4 | 0.6 | Republic of Korea |
| Female | 2005 | 0.4 | 0.3 | 0.5 | Republic of Korea |
| Female | 2006 | 0.4 | 0.3 | 0.5 | Republic of Korea |
| Female | 2007 | 0.5 | 0.4 | 0.6 | Republic of Korea |
| Female | 2008 | 0.5 | 0.4 | 0.6 | Republic of Korea |
| Female | 2009 | 0.4 | 0.3 | 0.5 | Republic of Korea |
| Female | 2010 | 0.5 | 0.4 | 0.6 | Republic of Korea |
| Female | 2011 | 0.4 | 0.3 | 0.5 | Republic of Korea |
| Female | 2012 | 0.5 | 0.4 | 0.6 | Republic of Korea |
| Male   | 1983 | 2.9 | 1.7 | 4.1 | Philippines       |
| Male   | 1984 | 3.9 | 2.5 | 5.3 | Philippines       |
| Male   | 1985 | 3.1 | 1.9 | 4.3 | Philippines       |
| Male   | 1986 | 2.7 | 1.5 | 3.9 | Philippines       |
| Male   | 1987 | 3.3 | 2.1 | 4.5 | Philippines       |
| Male   | 1988 | 3.4 | 2.1 | 4.7 | Philippines       |
| Male   | 1989 | 3.7 | 2.4 | 5.0 | Philippines       |
| Male   | 1990 | 2.6 | 1.6 | 3.6 | Philippines       |
| Male   | 1991 | 2.9 | 1.8 | 4.0 | Philippines       |
| Male   | 1992 | 2.9 | 1.9 | 3.9 | Philippines       |
| Male   | 1993 | 2.4 | 1.4 | 3.4 | Philippines       |
| Male   | 1994 | 3.1 | 2.0 | 4.2 | Philippines       |
| Male   | 1995 | 3.1 | 2.0 | 4.2 | Philippines       |
| Male   | 1996 | 3.1 | 2.1 | 4.1 | Philippines       |
| Male   | 1997 | 3.7 | 2.6 | 4.8 | Philippines       |
| Male   | 1998 | 3.6 | 2.5 | 4.7 | Philippines       |
| Male   | 1999 | 2.7 | 1.8 | 3.6 | Philippines       |
| Male   | 2000 | 2.5 | 1.6 | 3.4 | Philippines       |
| Male   | 2001 | 2.5 | 1.6 | 3.4 | Philippines       |
| Male   | 2002 | 4.1 | 3.0 | 5.2 | Philippines       |
| Male   | 2003 | 3.7 | 2.7 | 4.7 | Philippines       |
| Male   | 2004 | 2.5 | 1.7 | 3.3 | Philippines       |
| Male   | 2005 | 2.0 | 1.3 | 2.7 | Philippines       |
| Male   | 2006 | 2.7 | 1.9 | 3.5 | Philippines       |
| Male   | 2007 | 2.3 | 1.5 | 3.1 | Philippines       |
| Male   | 2008 | 2.5 | 1.7 | 3.3 | Philippines       |
| Male   | 2009 | 2.4 | 1.7 | 3.1 | Philippines       |
| Male   | 2010 | 2.9 | 2.1 | 3.7 | Philippines       |
| Male   | 2011 | 1.9 | 1.3 | 2.5 | Philippines       |
| Male   | 2012 | 1.7 | 1.1 | 2.3 | Philippines       |
| Female | 1983 | 2.7 | 1.6 | 3.8 | Philippines       |
| Female | 1984 | 1.9 | 1.0 | 2.8 | Philippines       |
| Female | 1985 | 2.8 | 1.7 | 3.9 | Philippines       |
| Female | 1986 | 2.2 | 1.3 | 3.1 | Philippines       |

|        |      |     |     |     |             |
|--------|------|-----|-----|-----|-------------|
| Female | 1987 | 2.2 | 1.3 | 3.1 | Philippines |
| Female | 1988 | 2.6 | 1.6 | 3.6 | Philippines |
| Female | 1989 | 1.2 | 0.5 | 1.9 | Philippines |
| Female | 1990 | 1.8 | 1.0 | 2.6 | Philippines |
| Female | 1991 | 1.8 | 1.0 | 2.6 | Philippines |
| Female | 1992 | 1.1 | 0.5 | 1.7 | Philippines |
| Female | 1993 | 1.4 | 0.7 | 2.1 | Philippines |
| Female | 1994 | 1.2 | 0.5 | 1.9 | Philippines |
| Female | 1995 | 1.2 | 0.6 | 1.8 | Philippines |
| Female | 1996 | 1.9 | 1.2 | 2.6 | Philippines |
| Female | 1997 | 1.2 | 0.6 | 1.8 | Philippines |
| Female | 1998 | 0.8 | 0.4 | 1.2 | Philippines |
| Female | 1999 | 0.5 | 0.2 | 0.8 | Philippines |
| Female | 2000 | 0.9 | 0.5 | 1.3 | Philippines |
| Female | 2001 | 0.6 | 0.2 | 1.0 | Philippines |
| Female | 2002 | 1.0 | 0.5 | 1.5 | Philippines |
| Female | 2003 | 1.0 | 0.5 | 1.5 | Philippines |
| Female | 2004 | 0.8 | 0.4 | 1.2 | Philippines |
| Female | 2005 | 0.8 | 0.4 | 1.2 | Philippines |
| Female | 2006 | 1.0 | 0.6 | 1.4 | Philippines |
| Female | 2007 | 0.8 | 0.4 | 1.2 | Philippines |
| Female | 2008 | 0.9 | 0.5 | 1.3 | Philippines |
| Female | 2009 | 0.4 | 0.1 | 0.7 | Philippines |
| Female | 2010 | 0.6 | 0.3 | 0.9 | Philippines |
| Female | 2011 | 0.6 | 0.3 | 0.9 | Philippines |
| Female | 2012 | 0.5 | 0.2 | 0.8 | Philippines |
| Male   | 1993 | 3.0 | 2.2 | 3.8 | Thailand    |
| Male   | 1994 | 2.8 | 2.1 | 3.5 | Thailand    |
| Male   | 1995 | 2.2 | 1.6 | 2.8 | Thailand    |
| Male   | 1996 | 2.7 | 2.0 | 3.4 | Thailand    |
| Male   | 1997 | 2.7 | 2.0 | 3.4 | Thailand    |
| Male   | 1998 | 3.2 | 2.5 | 3.9 | Thailand    |
| Male   | 1999 | 3.4 | 2.6 | 4.2 | Thailand    |
| Male   | 2000 | 3.2 | 2.5 | 3.9 | Thailand    |
| Male   | 2001 | 3.3 | 2.6 | 4.0 | Thailand    |
| Male   | 2002 | 2.6 | 2.0 | 3.2 | Thailand    |
| Male   | 2003 | 2.5 | 1.9 | 3.1 | Thailand    |
| Male   | 2004 | 2.9 | 2.3 | 3.5 | Thailand    |
| Male   | 2005 | 2.9 | 2.3 | 3.5 | Thailand    |
| Male   | 2006 | 2.8 | 2.2 | 3.4 | Thailand    |
| Male   | 2007 | 3.1 | 2.5 | 3.7 | Thailand    |
| Male   | 2008 | 3.3 | 2.7 | 3.9 | Thailand    |
| Male   | 2009 | 3.1 | 2.5 | 3.7 | Thailand    |
| Male   | 2010 | 3.1 | 2.5 | 3.7 | Thailand    |
| Male   | 2011 | 3.3 | 2.7 | 3.9 | Thailand    |
| Male   | 2012 | 3.1 | 2.5 | 3.7 | Thailand    |

|        |      |     |     |     |          |
|--------|------|-----|-----|-----|----------|
| Female | 1993 | 1.5 | 1.0 | 2.0 | Thailand |
| Female | 1994 | 1.4 | 0.9 | 1.9 | Thailand |
| Female | 1995 | 0.9 | 0.5 | 1.3 | Thailand |
| Female | 1996 | 1.0 | 0.6 | 1.4 | Thailand |
| Female | 1997 | 1.3 | 0.8 | 1.8 | Thailand |
| Female | 1998 | 1.0 | 0.6 | 1.4 | Thailand |
| Female | 1999 | 0.7 | 0.4 | 1.0 | Thailand |
| Female | 2000 | 1.1 | 0.7 | 1.5 | Thailand |
| Female | 2001 | 0.7 | 0.4 | 1.0 | Thailand |
| Female | 2002 | 0.8 | 0.5 | 1.1 | Thailand |
| Female | 2003 | 0.5 | 0.3 | 0.7 | Thailand |
| Female | 2004 | 0.5 | 0.3 | 0.7 | Thailand |
| Female | 2005 | 0.6 | 0.3 | 0.9 | Thailand |
| Female | 2006 | 0.6 | 0.3 | 0.9 | Thailand |
| Female | 2007 | 0.8 | 0.5 | 1.1 | Thailand |
| Female | 2008 | 0.4 | 0.2 | 0.6 | Thailand |
| Female | 2009 | 0.7 | 0.4 | 1.0 | Thailand |
| Female | 2010 | 0.4 | 0.2 | 0.6 | Thailand |
| Female | 2011 | 0.6 | 0.4 | 0.8 | Thailand |
| Female | 2012 | 0.4 | 0.2 | 0.6 | Thailand |
| Male   | 1998 | 1.8 | 1.2 | 2.4 | Turkey   |
| Male   | 1999 | 2.2 | 1.5 | 2.9 | Turkey   |
| Male   | 2000 | 2.0 | 1.4 | 2.6 | Turkey   |
| Male   | 2001 | 2.4 | 1.8 | 3.0 | Turkey   |
| Male   | 2002 | 2.6 | 1.9 | 3.3 | Turkey   |
| Male   | 2003 | 2.4 | 1.8 | 3.0 | Turkey   |
| Male   | 2004 | 2.3 | 1.7 | 2.9 | Turkey   |
| Male   | 2005 | 2.2 | 1.6 | 2.8 | Turkey   |
| Male   | 2006 | 2.3 | 1.7 | 2.9 | Turkey   |
| Male   | 2007 | 2.3 | 1.7 | 2.9 | Turkey   |
| Male   | 2008 | 2.2 | 1.7 | 2.7 | Turkey   |
| Male   | 2009 | 2.3 | 1.8 | 2.8 | Turkey   |
| Male   | 2010 | 2.2 | 1.7 | 2.7 | Turkey   |
| Male   | 2011 | 1.6 | 1.2 | 2.0 | Turkey   |
| Male   | 2012 | 1.7 | 1.3 | 2.1 | Turkey   |
| Female | 1998 | 1.0 | 0.6 | 1.4 | Turkey   |
| Female | 1999 | 0.8 | 0.4 | 1.2 | Turkey   |
| Female | 2000 | 1.3 | 0.8 | 1.8 | Turkey   |
| Female | 2001 | 1.1 | 0.7 | 1.5 | Turkey   |
| Female | 2002 | 1.3 | 0.9 | 1.7 | Turkey   |
| Female | 2003 | 1.3 | 0.9 | 1.7 | Turkey   |
| Female | 2004 | 1.7 | 1.2 | 2.2 | Turkey   |
| Female | 2005 | 1.2 | 0.8 | 1.6 | Turkey   |
| Female | 2006 | 1.3 | 0.9 | 1.7 | Turkey   |
| Female | 2007 | 1.5 | 1.1 | 1.9 | Turkey   |
| Female | 2008 | 1.3 | 0.9 | 1.7 | Turkey   |

|        |      |     |     |     |          |
|--------|------|-----|-----|-----|----------|
| Female | 2009 | 1.6 | 1.2 | 2.0 | Turkey   |
| Female | 2010 | 1.2 | 0.9 | 1.5 | Turkey   |
| Female | 2011 | 1.1 | 0.8 | 1.4 | Turkey   |
| Female | 2012 | 1.3 | 0.9 | 1.7 | Turkey   |
| Male   | 1998 | 4.4 | 3.9 | 4.9 | Austria  |
| Male   | 1999 | 4.5 | 3.9 | 5.1 | Austria  |
| Male   | 2000 | 4.5 | 3.9 | 5.1 | Austria  |
| Male   | 2001 | 4.9 | 4.3 | 5.5 | Austria  |
| Male   | 2002 | 4.5 | 4.0 | 5.0 | Austria  |
| Male   | 2003 | 4.7 | 4.2 | 5.2 | Austria  |
| Male   | 2004 | 4.9 | 4.3 | 5.5 | Austria  |
| Male   | 2005 | 5.1 | 4.5 | 5.7 | Austria  |
| Male   | 2006 | 4.7 | 4.2 | 5.2 | Austria  |
| Male   | 2007 | 4.9 | 4.4 | 5.4 | Austria  |
| Male   | 2008 | 5.0 | 4.5 | 5.5 | Austria  |
| Male   | 2009 | 4.3 | 3.8 | 4.8 | Austria  |
| Male   | 2010 | 4.8 | 4.3 | 5.3 | Austria  |
| Male   | 2011 | 4.4 | 3.9 | 4.9 | Austria  |
| Male   | 2012 | 4.3 | 3.8 | 4.8 | Austria  |
| Female | 1998 | 0.8 | 0.6 | 1.0 | Austria  |
| Female | 1999 | 0.7 | 0.5 | 0.9 | Austria  |
| Female | 2000 | 0.7 | 0.5 | 0.9 | Austria  |
| Female | 2001 | 1.0 | 0.8 | 1.2 | Austria  |
| Female | 2002 | 0.9 | 0.7 | 1.1 | Austria  |
| Female | 2003 | 0.9 | 0.7 | 1.1 | Austria  |
| Female | 2004 | 0.7 | 0.5 | 0.9 | Austria  |
| Female | 2005 | 0.8 | 0.6 | 1.0 | Austria  |
| Female | 2006 | 1.1 | 0.9 | 1.3 | Austria  |
| Female | 2007 | 0.8 | 0.6 | 1.0 | Austria  |
| Female | 2008 | 0.7 | 0.5 | 0.9 | Austria  |
| Female | 2009 | 0.9 | 0.7 | 1.1 | Austria  |
| Female | 2010 | 1.1 | 0.9 | 1.3 | Austria  |
| Female | 2011 | 0.9 | 0.7 | 1.1 | Austria  |
| Female | 2012 | 1.0 | 0.8 | 1.2 | Austria  |
| Male   | 1998 | 2.7 | 2.3 | 3.1 | Bulgaria |
| Male   | 1999 | 2.4 | 2.0 | 2.8 | Bulgaria |
| Male   | 2000 | 2.2 | 1.8 | 2.6 | Bulgaria |
| Male   | 2001 | 2.1 | 1.7 | 2.5 | Bulgaria |
| Male   | 2002 | 1.8 | 1.5 | 2.1 | Bulgaria |
| Male   | 2003 | 2.4 | 2.0 | 2.8 | Bulgaria |
| Male   | 2004 | 2.4 | 2.0 | 2.8 | Bulgaria |
| Male   | 2005 | 2.2 | 1.8 | 2.6 | Bulgaria |
| Male   | 2006 | 2.7 | 2.3 | 3.1 | Bulgaria |
| Male   | 2007 | 2.6 | 2.2 | 3.0 | Bulgaria |
| Male   | 2008 | 2.7 | 2.3 | 3.1 | Bulgaria |
| Male   | 2009 | 2.7 | 2.3 | 3.1 | Bulgaria |

|        |      |     |     |     |          |
|--------|------|-----|-----|-----|----------|
| Male   | 2010 | 2.5 | 2.1 | 2.9 | Bulgaria |
| Male   | 2011 | 2.4 | 2.0 | 2.8 | Bulgaria |
| Male   | 2012 | 3.3 | 2.9 | 3.7 | Bulgaria |
| Female | 1998 | 0.4 | 0.3 | 0.5 | Bulgaria |
| Female | 1999 | 0.5 | 0.3 | 0.7 | Bulgaria |
| Female | 2000 | 0.3 | 0.2 | 0.4 | Bulgaria |
| Female | 2001 | 0.4 | 0.3 | 0.5 | Bulgaria |
| Female | 2002 | 0.5 | 0.4 | 0.6 | Bulgaria |
| Female | 2003 | 0.4 | 0.3 | 0.5 | Bulgaria |
| Female | 2004 | 0.5 | 0.4 | 0.6 | Bulgaria |
| Female | 2005 | 0.4 | 0.3 | 0.5 | Bulgaria |
| Female | 2006 | 0.4 | 0.3 | 0.5 | Bulgaria |
| Female | 2007 | 0.4 | 0.3 | 0.5 | Bulgaria |
| Female | 2008 | 0.4 | 0.3 | 0.5 | Bulgaria |
| Female | 2009 | 0.6 | 0.4 | 0.8 | Bulgaria |
| Female | 2010 | 0.4 | 0.3 | 0.5 | Bulgaria |
| Female | 2011 | 0.4 | 0.3 | 0.5 | Bulgaria |
| Female | 2012 | 0.5 | 0.4 | 0.6 | Bulgaria |
| Male   | 1983 | 4.0 | 3.4 | 4.6 | Belarus  |
| Male   | 1984 | 4.0 | 3.4 | 4.6 | Belarus  |
| Male   | 1985 | 4.4 | 3.8 | 5.0 | Belarus  |
| Male   | 1986 | 4.5 | 3.9 | 5.1 | Belarus  |
| Male   | 1987 | 4.8 | 4.2 | 5.4 | Belarus  |
| Male   | 1988 | 5.1 | 4.5 | 5.7 | Belarus  |
| Male   | 1989 | 5.4 | 4.8 | 6.0 | Belarus  |
| Male   | 1990 | 5.5 | 4.9 | 6.1 | Belarus  |
| Male   | 1991 | 6.1 | 5.4 | 6.8 | Belarus  |
| Male   | 1992 | 6.0 | 5.4 | 6.6 | Belarus  |
| Male   | 1993 | 6.3 | 5.6 | 7.0 | Belarus  |
| Male   | 1994 | 6.1 | 5.5 | 6.7 | Belarus  |
| Male   | 1995 | 5.8 | 5.2 | 6.4 | Belarus  |
| Male   | 1996 | 5.4 | 4.8 | 6.0 | Belarus  |
| Male   | 1997 | 5.5 | 4.9 | 6.1 | Belarus  |
| Male   | 1998 | 5.8 | 5.2 | 6.4 | Belarus  |
| Male   | 1999 | 6.3 | 5.6 | 7.0 | Belarus  |
| Male   | 2000 | 5.8 | 5.2 | 6.4 | Belarus  |
| Male   | 2001 | 6.6 | 5.9 | 7.3 | Belarus  |
| Male   | 2002 | 5.9 | 5.3 | 6.5 | Belarus  |
| Male   | 2003 | 6.8 | 6.1 | 7.5 | Belarus  |
| Male   | 2004 | 6.1 | 5.5 | 6.7 | Belarus  |
| Male   | 2005 | 6.4 | 5.8 | 7.0 | Belarus  |
| Male   | 2006 | 7.0 | 6.3 | 7.7 | Belarus  |
| Male   | 2007 | 6.9 | 6.2 | 7.6 | Belarus  |
| Male   | 2008 | 6.5 | 5.8 | 7.2 | Belarus  |
| Male   | 2009 | 6.8 | 6.1 | 7.5 | Belarus  |
| Male   | 2010 | 7.2 | 6.5 | 7.9 | Belarus  |



|        |      |     |       |     |         |
|--------|------|-----|-------|-----|---------|
| Male   | 2011 | 7.0 | 6.3   | 7.7 | Belarus |
| Male   | 2012 | 7.1 | 6.4   | 7.8 | Belarus |
| Female | 1983 | 0.5 | 0.4   | 0.6 | Belarus |
| Female | 1984 | 0.6 | 0.4   | 0.8 | Belarus |
| Female | 1985 | 0.5 | 0.4   | 0.6 | Belarus |
| Female | 1986 | 0.6 | 0.4   | 0.8 | Belarus |
| Female | 1987 | 0.5 | 0.4   | 0.6 | Belarus |
| Female | 1988 | 0.6 | 0.4   | 0.8 | Belarus |
| Female | 1989 | 0.5 | 0.4   | 0.6 | Belarus |
| Female | 1990 | 0.5 | 0.4   | 0.6 | Belarus |
| Female | 1991 | 0.7 | 0.5   | 0.9 | Belarus |
| Female | 1992 | 0.6 | 0.4   | 0.8 | Belarus |
| Female | 1993 | 0.5 | 0.4   | 0.6 | Belarus |
| Female | 1994 | 0.6 | 0.4   | 0.8 | Belarus |
| Female | 1995 | 0.4 | 0.3   | 0.5 | Belarus |
| Female | 1996 | 0.3 | 0.2   | 0.4 | Belarus |
| Female | 1997 | 0.3 | 0.2   | 0.4 | Belarus |
| Female | 1998 | 0.5 | 0.4   | 0.6 | Belarus |
| Female | 1999 | 0.3 | 0.2   | 0.4 | Belarus |
| Female | 2000 | 0.4 | 0.3   | 0.5 | Belarus |
| Female | 2001 | 0.4 | 0.3   | 0.5 | Belarus |
| Female | 2002 | 0.3 | 0.2   | 0.4 | Belarus |
| Female | 2003 | 0.3 | 0.2   | 0.4 | Belarus |
| Female | 2004 | 0.5 | 0.4   | 0.6 | Belarus |
| Female | 2005 | 0.3 | 0.2   | 0.4 | Belarus |
| Female | 2006 | 0.5 | 0.4   | 0.6 | Belarus |
| Female | 2007 | 0.4 | 0.3   | 0.5 | Belarus |
| Female | 2008 | 0.3 | 0.2   | 0.4 | Belarus |
| Female | 2009 | 0.4 | 0.3   | 0.5 | Belarus |
| Female | 2010 | 0.3 | 0.2   | 0.4 | Belarus |
| Female | 2011 | 0.4 | 0.3   | 0.5 | Belarus |
| Female | 2012 | 0.5 | 0.4   | 0.6 | Belarus |
| Male   | 1998 | 1.4 | 0.0   | 2.8 | Cyprus  |
| Male   | 1999 | 1.6 | 0.4   | 2.8 | Cyprus  |
| Male   | 2000 | 1.2 | 0.1   | 2.3 | Cyprus  |
| Male   | 2001 | 0.8 | 0.0   | 1.6 | Cyprus  |
| Male   | 2002 | 1.4 | 0.3   | 2.5 | Cyprus  |
| Male   | 2003 | 0.9 | 0.0   | 1.8 | Cyprus  |
| Male   | 2004 | 0.3 | (0.1) | 0.7 | Cyprus  |
| Male   | 2005 | 1.2 | 0.2   | 2.2 | Cyprus  |
| Male   | 2006 | 2.3 | 1.0   | 3.6 | Cyprus  |
| Male   | 2007 | 1.8 | 0.7   | 2.9 | Cyprus  |
| Male   | 2008 | 1.1 | 0.2   | 2.0 | Cyprus  |
| Male   | 2009 | 1.4 | 0.5   | 2.3 | Cyprus  |
| Male   | 2010 | 1.8 | 0.7   | 2.9 | Cyprus  |
| Male   | 2011 | 0.5 | (0.1) | 1.1 | Cyprus  |

|        |      |     |       |     |                |
|--------|------|-----|-------|-----|----------------|
| Male   | 2012 | 1.0 | 0.2   | 1.8 | Cyprus         |
| Female | 1998 | 0.4 | (0.1) | 0.9 | Cyprus         |
| Female | 2000 | 0.7 | (0.1) | 1.5 | Cyprus         |
| Female | 2001 | 0.2 | (0.2) | 0.6 | Cyprus         |
| Female | 2002 | 0.2 | (0.2) | 0.6 | Cyprus         |
| Female | 2003 | 0.8 | 0.0   | 1.6 | Cyprus         |
| Female | 2005 | 0.2 | (0.2) | 0.6 | Cyprus         |
| Female | 2006 | 0.4 | (0.2) | 1.0 | Cyprus         |
| Female | 2007 | 0.5 | 0.0   | 1.0 | Cyprus         |
| Female | 2008 | 0.3 | (0.0) | 0.6 | Cyprus         |
| Female | 2009 | 0.9 | 0.2   | 1.6 | Cyprus         |
| Female | 2010 | 0.2 | (0.2) | 0.6 | Cyprus         |
| Female | 2011 | 0.7 | 0.0   | 1.4 | Cyprus         |
| Female | 2012 | 0.2 | (0.2) | 0.6 | Cyprus         |
| Male   | 1983 | 3.2 | 2.7   | 3.7 | Czech Republic |
| Male   | 1984 | 3.6 | 3.1   | 4.1 | Czech Republic |
| Male   | 1985 | 3.0 | 2.6   | 3.4 | Czech Republic |
| Male   | 1986 | 3.1 | 2.7   | 3.5 | Czech Republic |
| Male   | 1987 | 3.7 | 3.2   | 4.2 | Czech Republic |
| Male   | 1988 | 3.7 | 3.2   | 4.2 | Czech Republic |
| Male   | 1989 | 4.3 | 3.8   | 4.8 | Czech Republic |
| Male   | 1990 | 3.9 | 3.4   | 4.4 | Czech Republic |
| Male   | 1991 | 4.4 | 3.9   | 4.9 | Czech Republic |
| Male   | 1992 | 4.7 | 4.2   | 5.2 | Czech Republic |
| Male   | 1993 | 4.7 | 4.2   | 5.2 | Czech Republic |
| Male   | 1994 | 5.4 | 4.8   | 6.0 | Czech Republic |
| Male   | 1995 | 4.8 | 4.3   | 5.3 | Czech Republic |
| Male   | 1996 | 5.0 | 4.5   | 5.5 | Czech Republic |
| Male   | 1997 | 5.5 | 4.9   | 6.1 | Czech Republic |
| Male   | 1998 | 5.4 | 4.8   | 6.0 | Czech Republic |
| Male   | 1999 | 5.3 | 4.8   | 5.8 | Czech Republic |
| Male   | 2000 | 4.6 | 4.1   | 5.1 | Czech Republic |
| Male   | 2001 | 4.4 | 3.9   | 4.9 | Czech Republic |
| Male   | 2002 | 5.7 | 5.2   | 6.2 | Czech Republic |
| Male   | 2003 | 5.4 | 4.9   | 5.9 | Czech Republic |
| Male   | 2004 | 5.2 | 4.7   | 5.7 | Czech Republic |
| Male   | 2005 | 5.1 | 4.6   | 5.6 | Czech Republic |
| Male   | 2006 | 5.4 | 4.9   | 5.9 | Czech Republic |
| Male   | 2007 | 5.4 | 4.9   | 5.9 | Czech Republic |
| Male   | 2008 | 5.8 | 5.3   | 6.3 | Czech Republic |
| Male   | 2009 | 6.0 | 5.5   | 6.5 | Czech Republic |
| Male   | 2010 | 5.9 | 5.4   | 6.4 | Czech Republic |
| Male   | 2011 | 5.1 | 4.6   | 5.6 | Czech Republic |
| Male   | 2012 | 6.1 | 5.6   | 6.6 | Czech Republic |
| Female | 1983 | 0.4 | 0.3   | 0.5 | Czech Republic |
| Female | 1984 | 0.4 | 0.3   | 0.5 | Czech Republic |

|        |      |     |     |      |                |
|--------|------|-----|-----|------|----------------|
| Female | 1985 | 0.3 | 0.2 | 0.4  | Czech Republic |
| Female | 1986 | 0.3 | 0.2 | 0.4  | Czech Republic |
| Female | 1987 | 0.4 | 0.3 | 0.5  | Czech Republic |
| Female | 1988 | 0.4 | 0.3 | 0.5  | Czech Republic |
| Female | 1989 | 0.6 | 0.4 | 0.8  | Czech Republic |
| Female | 1990 | 0.6 | 0.5 | 0.7  | Czech Republic |
| Female | 1991 | 0.5 | 0.4 | 0.6  | Czech Republic |
| Female | 1992 | 0.5 | 0.4 | 0.6  | Czech Republic |
| Female | 1993 | 0.5 | 0.4 | 0.6  | Czech Republic |
| Female | 1994 | 0.5 | 0.4 | 0.6  | Czech Republic |
| Female | 1995 | 0.5 | 0.4 | 0.6  | Czech Republic |
| Female | 1996 | 0.7 | 0.5 | 0.9  | Czech Republic |
| Female | 1997 | 0.6 | 0.5 | 0.7  | Czech Republic |
| Female | 1998 | 0.6 | 0.5 | 0.7  | Czech Republic |
| Female | 1999 | 0.8 | 0.6 | 1.0  | Czech Republic |
| Female | 2000 | 0.5 | 0.4 | 0.6  | Czech Republic |
| Female | 2001 | 0.5 | 0.4 | 0.6  | Czech Republic |
| Female | 2002 | 0.5 | 0.4 | 0.6  | Czech Republic |
| Female | 2003 | 0.6 | 0.5 | 0.7  | Czech Republic |
| Female | 2004 | 0.8 | 0.6 | 1.0  | Czech Republic |
| Female | 2005 | 0.9 | 0.7 | 1.1  | Czech Republic |
| Female | 2006 | 0.6 | 0.5 | 0.7  | Czech Republic |
| Female | 2007 | 0.9 | 0.7 | 1.1  | Czech Republic |
| Female | 2008 | 0.9 | 0.7 | 1.1  | Czech Republic |
| Female | 2009 | 1.0 | 0.8 | 1.2  | Czech Republic |
| Female | 2010 | 1.0 | 0.8 | 1.2  | Czech Republic |
| Female | 2011 | 0.8 | 0.6 | 1.0  | Czech Republic |
| Female | 2012 | 1.1 | 0.9 | 1.3  | Czech Republic |
| Male   | 1983 | 3.6 | 2.3 | 4.9  | Estonia        |
| Male   | 1984 | 4.8 | 3.2 | 6.4  | Estonia        |
| Male   | 1985 | 5.5 | 3.9 | 7.1  | Estonia        |
| Male   | 1986 | 5.4 | 3.8 | 7.0  | Estonia        |
| Male   | 1987 | 6.1 | 4.4 | 7.8  | Estonia        |
| Male   | 1988 | 5.5 | 3.9 | 7.1  | Estonia        |
| Male   | 1989 | 5.3 | 3.8 | 6.8  | Estonia        |
| Male   | 1990 | 5.7 | 4.1 | 7.3  | Estonia        |
| Male   | 1991 | 6.3 | 4.6 | 8.0  | Estonia        |
| Male   | 1992 | 5.2 | 3.7 | 6.7  | Estonia        |
| Male   | 1993 | 8.3 | 6.4 | 10.2 | Estonia        |
| Male   | 1994 | 5.6 | 4.0 | 7.2  | Estonia        |
| Male   | 1995 | 5.6 | 4.0 | 7.2  | Estonia        |
| Male   | 1996 | 6.2 | 4.5 | 7.9  | Estonia        |
| Male   | 1997 | 5.1 | 3.6 | 6.6  | Estonia        |
| Male   | 1998 | 5.7 | 4.1 | 7.3  | Estonia        |
| Male   | 1999 | 5.3 | 3.8 | 6.8  | Estonia        |
| Male   | 2000 | 5.3 | 3.8 | 6.8  | Estonia        |

|        |      |      |      |      |         |
|--------|------|------|------|------|---------|
| Male   | 2001 | 4.9  | 3.5  | 6.3  | Estonia |
| Male   | 2002 | 4.9  | 3.5  | 6.3  | Estonia |
| Male   | 2003 | 4.3  | 2.9  | 5.7  | Estonia |
| Male   | 2004 | 6.8  | 5.1  | 8.5  | Estonia |
| Male   | 2005 | 5.0  | 3.6  | 6.4  | Estonia |
| Male   | 2006 | 5.7  | 4.2  | 7.2  | Estonia |
| Male   | 2007 | 5.2  | 3.7  | 6.7  | Estonia |
| Male   | 2008 | 7.2  | 5.5  | 8.9  | Estonia |
| Male   | 2009 | 6.1  | 4.5  | 7.7  | Estonia |
| Male   | 2010 | 5.2  | 3.7  | 6.7  | Estonia |
| Male   | 2011 | 6.9  | 5.2  | 8.6  | Estonia |
| Male   | 2012 | 5.7  | 4.2  | 7.2  | Estonia |
| Female | 1983 | 0.6  | 0.2  | 1.0  | Estonia |
| Female | 1984 | 0.8  | 0.3  | 1.3  | Estonia |
| Female | 1985 | 0.7  | 0.3  | 1.1  | Estonia |
| Female | 1986 | 0.3  | 0.0  | 0.6  | Estonia |
| Female | 1987 | 0.7  | 0.3  | 1.1  | Estonia |
| Female | 1988 | 0.5  | 0.2  | 0.8  | Estonia |
| Female | 1989 | 0.5  | 0.2  | 0.8  | Estonia |
| Female | 1990 | 1.0  | 0.6  | 1.4  | Estonia |
| Female | 1991 | 1.0  | 0.5  | 1.5  | Estonia |
| Female | 1992 | 0.3  | 0.1  | 0.5  | Estonia |
| Female | 1993 | 0.5  | 0.1  | 0.9  | Estonia |
| Female | 1994 | 0.4  | 0.1  | 0.7  | Estonia |
| Female | 1995 | 1.1  | 0.6  | 1.6  | Estonia |
| Female | 1996 | 0.6  | 0.3  | 0.9  | Estonia |
| Female | 1997 | 0.5  | 0.1  | 0.9  | Estonia |
| Female | 1998 | 0.4  | 0.2  | 0.6  | Estonia |
| Female | 1999 | 0.7  | 0.3  | 1.1  | Estonia |
| Female | 2000 | 0.5  | 0.2  | 0.8  | Estonia |
| Female | 2001 | 0.7  | 0.3  | 1.1  | Estonia |
| Female | 2002 | 0.3  | 0.1  | 0.5  | Estonia |
| Female | 2003 | 0.8  | 0.4  | 1.2  | Estonia |
| Female | 2004 | 0.4  | 0.1  | 0.7  | Estonia |
| Female | 2005 | 0.6  | 0.3  | 0.9  | Estonia |
| Female | 2006 | 0.8  | 0.3  | 1.3  | Estonia |
| Female | 2007 | 0.9  | 0.4  | 1.4  | Estonia |
| Female | 2008 | 0.5  | 0.2  | 0.8  | Estonia |
| Female | 2009 | 0.6  | 0.2  | 1.0  | Estonia |
| Female | 2010 | 0.8  | 0.4  | 1.2  | Estonia |
| Female | 2011 | 0.7  | 0.3  | 1.1  | Estonia |
| Female | 2012 | 1.1  | 0.6  | 1.6  | Estonia |
| Male   | 1998 | 11.9 | 10.9 | 12.9 | France  |
| Male   | 1999 | 11.6 | 10.6 | 12.6 | France  |
| Male   | 2000 | 10.4 | 9.5  | 11.3 | France  |
| Male   | 2001 | 9.6  | 8.8  | 10.4 | France  |

|        |      |     |     |      |         |
|--------|------|-----|-----|------|---------|
| Male   | 2002 | 9.5 | 8.7 | 10.3 | France  |
| Male   | 2003 | 9.5 | 8.7 | 10.3 | France  |
| Male   | 2004 | 8.3 | 7.6 | 9.0  | France  |
| Male   | 2005 | 8.9 | 8.1 | 9.7  | France  |
| Male   | 2006 | 8.5 | 7.8 | 9.2  | France  |
| Male   | 2007 | 8.4 | 7.7 | 9.1  | France  |
| Male   | 2008 | 8.0 | 7.3 | 8.7  | France  |
| Male   | 2009 | 7.3 | 6.6 | 8.0  | France  |
| Male   | 2010 | 7.5 | 6.8 | 8.2  | France  |
| Male   | 2011 | 7.9 | 7.2 | 8.6  | France  |
| Female | 1998 | 1.3 | 1.0 | 1.6  | France  |
| Female | 1999 | 1.2 | 0.9 | 1.5  | France  |
| Female | 2000 | 1.4 | 1.1 | 1.7  | France  |
| Female | 2001 | 1.3 | 1.0 | 1.6  | France  |
| Female | 2002 | 1.4 | 1.1 | 1.7  | France  |
| Female | 2003 | 1.4 | 1.1 | 1.7  | France  |
| Female | 2004 | 1.1 | 0.9 | 1.3  | France  |
| Female | 2005 | 1.3 | 1.0 | 1.6  | France  |
| Female | 2006 | 1.5 | 1.2 | 1.8  | France  |
| Female | 2007 | 1.4 | 1.1 | 1.7  | France  |
| Female | 2008 | 1.1 | 0.9 | 1.3  | France  |
| Female | 2009 | 1.4 | 1.2 | 1.6  | France  |
| Female | 2010 | 1.6 | 1.3 | 1.9  | France  |
| Female | 2011 | 1.4 | 1.2 | 1.6  | France  |
| Male   | 1998 | 7.7 | 6.5 | 8.9  | Germany |
| Male   | 1999 | 6.4 | 5.4 | 7.4  | Germany |
| Male   | 2000 | 7.1 | 6.0 | 8.2  | Germany |
| Male   | 2001 | 6.6 | 5.5 | 7.7  | Germany |
| Male   | 2002 | 6.6 | 5.6 | 7.6  | Germany |
| Male   | 2003 | 6.4 | 5.4 | 7.4  | Germany |
| Male   | 2004 | 7.0 | 5.9 | 8.1  | Germany |
| Male   | 2005 | 8.0 | 6.9 | 9.1  | Germany |
| Male   | 2006 | 7.1 | 6.1 | 8.1  | Germany |
| Male   | 2007 | 7.7 | 6.6 | 8.8  | Germany |
| Male   | 2008 | 6.7 | 5.7 | 7.7  | Germany |
| Male   | 2009 | 7.2 | 6.1 | 8.3  | Germany |
| Male   | 2010 | 8.4 | 7.3 | 9.5  | Germany |
| Male   | 2011 | 6.8 | 5.8 | 7.8  | Germany |
| Male   | 2012 | 7.4 | 6.4 | 8.4  | Germany |
| Female | 1998 | 1.5 | 1.0 | 2.0  | Germany |
| Female | 1999 | 1.6 | 1.2 | 2.0  | Germany |
| Female | 2000 | 2.0 | 1.5 | 2.5  | Germany |
| Female | 2001 | 1.7 | 1.2 | 2.2  | Germany |
| Female | 2002 | 1.7 | 1.3 | 2.1  | Germany |
| Female | 2003 | 1.5 | 1.1 | 1.9  | Germany |
| Female | 2004 | 1.6 | 1.2 | 2.0  | Germany |

|        |      |     |     |      |         |
|--------|------|-----|-----|------|---------|
| Female | 2005 | 1.9 | 1.4 | 2.4  | Germany |
| Female | 2006 | 1.8 | 1.4 | 2.2  | Germany |
| Female | 2007 | 2.0 | 1.5 | 2.5  | Germany |
| Female | 2008 | 2.3 | 1.8 | 2.8  | Germany |
| Female | 2009 | 1.6 | 1.2 | 2.0  | Germany |
| Female | 2010 | 1.6 | 1.2 | 2.0  | Germany |
| Female | 2011 | 2.3 | 1.8 | 2.8  | Germany |
| Female | 2012 | 2.0 | 1.5 | 2.5  | Germany |
| Male   | 1994 | 7.7 | 6.5 | 8.9  | Ireland |
| Male   | 1995 | 7.6 | 6.5 | 8.7  | Ireland |
| Male   | 1996 | 8.2 | 7.0 | 9.4  | Ireland |
| Male   | 1997 | 8.6 | 7.4 | 9.8  | Ireland |
| Male   | 1998 | 6.5 | 5.5 | 7.5  | Ireland |
| Male   | 1999 | 8.1 | 7.0 | 9.2  | Ireland |
| Male   | 2000 | 7.4 | 6.3 | 8.5  | Ireland |
| Male   | 2001 | 8.5 | 7.4 | 9.6  | Ireland |
| Male   | 2002 | 7.4 | 6.4 | 8.4  | Ireland |
| Male   | 2003 | 7.3 | 6.3 | 8.3  | Ireland |
| Male   | 2004 | 8.8 | 7.7 | 9.9  | Ireland |
| Male   | 2005 | 7.9 | 6.8 | 9.0  | Ireland |
| Male   | 2006 | 7.7 | 6.7 | 8.7  | Ireland |
| Male   | 2007 | 9.0 | 7.9 | 10.1 | Ireland |
| Male   | 2008 | 7.7 | 6.7 | 8.7  | Ireland |
| Male   | 2009 | 8.2 | 7.2 | 9.2  | Ireland |
| Male   | 2010 | 7.6 | 6.6 | 8.6  | Ireland |
| Male   | 2011 | 7.5 | 6.6 | 8.4  | Ireland |
| Male   | 2012 | 7.2 | 6.3 | 8.1  | Ireland |
| Female | 1994 | 4.1 | 3.4 | 4.8  | Ireland |
| Female | 1995 | 4.3 | 3.6 | 5.0  | Ireland |
| Female | 1996 | 3.6 | 2.9 | 4.3  | Ireland |
| Female | 1997 | 3.3 | 2.7 | 3.9  | Ireland |
| Female | 1998 | 3.5 | 2.9 | 4.1  | Ireland |
| Female | 1999 | 3.4 | 2.8 | 4.0  | Ireland |
| Female | 2000 | 3.7 | 3.0 | 4.4  | Ireland |
| Female | 2001 | 3.6 | 3.0 | 4.2  | Ireland |
| Female | 2002 | 3.3 | 2.7 | 3.9  | Ireland |
| Female | 2003 | 3.8 | 3.1 | 4.5  | Ireland |
| Female | 2004 | 3.5 | 2.9 | 4.1  | Ireland |
| Female | 2005 | 3.2 | 2.6 | 3.8  | Ireland |
| Female | 2006 | 3.4 | 2.8 | 4.0  | Ireland |
| Female | 2007 | 3.5 | 2.9 | 4.1  | Ireland |
| Female | 2008 | 3.6 | 3.0 | 4.2  | Ireland |
| Female | 2009 | 3.1 | 2.6 | 3.6  | Ireland |
| Female | 2010 | 3.1 | 2.6 | 3.6  | Ireland |
| Female | 2011 | 3.2 | 2.7 | 3.7  | Ireland |
| Female | 2012 | 3.4 | 2.8 | 4.0  | Ireland |

|        |      |     |       |     |       |
|--------|------|-----|-------|-----|-------|
| Male   | 1998 | 4.4 | 3.8   | 5.0 | Italy |
| Male   | 1999 | 4.3 | 3.7   | 4.9 | Italy |
| Male   | 2000 | 4.1 | 3.5   | 4.7 | Italy |
| Male   | 2001 | 4.1 | 3.5   | 4.7 | Italy |
| Male   | 2002 | 4.4 | 3.8   | 5.0 | Italy |
| Male   | 2003 | 3.9 | 3.4   | 4.4 | Italy |
| Male   | 2004 | 3.7 | 3.2   | 4.2 | Italy |
| Male   | 2005 | 3.6 | 3.1   | 4.1 | Italy |
| Male   | 2006 | 3.1 | 2.6   | 3.6 | Italy |
| Male   | 2007 | 2.9 | 2.5   | 3.3 | Italy |
| Male   | 2008 | 3.3 | 2.9   | 3.7 | Italy |
| Male   | 2009 | 3.2 | 2.8   | 3.6 | Italy |
| Male   | 2010 | 3.3 | 2.9   | 3.7 | Italy |
| Female | 1998 | 0.9 | 0.7   | 1.1 | Italy |
| Female | 1999 | 0.7 | 0.5   | 0.9 | Italy |
| Female | 2000 | 0.9 | 0.7   | 1.1 | Italy |
| Female | 2001 | 1.0 | 0.8   | 1.2 | Italy |
| Female | 2002 | 0.9 | 0.7   | 1.1 | Italy |
| Female | 2003 | 0.9 | 0.7   | 1.1 | Italy |
| Female | 2004 | 0.8 | 0.6   | 1.0 | Italy |
| Female | 2005 | 0.9 | 0.7   | 1.1 | Italy |
| Female | 2006 | 0.8 | 0.6   | 1.0 | Italy |
| Female | 2007 | 0.7 | 0.5   | 0.9 | Italy |
| Female | 2008 | 1.0 | 0.8   | 1.2 | Italy |
| Female | 2009 | 0.9 | 0.7   | 1.1 | Italy |
| Female | 2010 | 0.8 | 0.6   | 1.0 | Italy |
| Male   | 1993 | 4.1 | 1.3   | 6.9 | Malta |
| Male   | 1994 | 5.1 | 2.2   | 8.0 | Malta |
| Male   | 1995 | 3.3 | 1.0   | 5.6 | Malta |
| Male   | 1996 | 3.9 | 1.4   | 6.4 | Malta |
| Male   | 1997 | 1.6 | 0.2   | 3.0 | Malta |
| Male   | 1998 | 3.4 | 1.2   | 5.6 | Malta |
| Male   | 1999 | 4.1 | 1.6   | 6.6 | Malta |
| Male   | 2000 | 0.7 | (0.3) | 1.7 | Malta |
| Male   | 2001 | 3.6 | 1.5   | 5.7 | Malta |
| Male   | 2002 | 2.3 | 0.6   | 4.0 | Malta |
| Male   | 2003 | 4.0 | 1.6   | 6.4 | Malta |
| Male   | 2004 | 1.8 | 0.2   | 3.4 | Malta |
| Male   | 2005 | 2.0 | 0.4   | 3.6 | Malta |
| Male   | 2006 | 4.1 | 1.9   | 6.3 | Malta |
| Male   | 2007 | 4.7 | 2.3   | 7.1 | Malta |
| Male   | 2008 | 5.1 | 2.7   | 7.5 | Malta |
| Male   | 2009 | 2.3 | 0.8   | 3.8 | Malta |
| Male   | 2010 | 2.6 | 1.0   | 4.2 | Malta |
| Male   | 2011 | 3.3 | 1.6   | 5.0 | Malta |
| Male   | 2012 | 3.7 | 1.8   | 5.6 | Malta |

|        |      |     |       |      |             |
|--------|------|-----|-------|------|-------------|
| Female | 1993 | 1.5 | 0.2   | 2.8  | Malta       |
| Female | 1994 | 1.4 | 0.2   | 2.6  | Malta       |
| Female | 1995 | 0.6 | (0.2) | 1.4  | Malta       |
| Female | 1996 | 0.9 | 0.0   | 1.8  | Malta       |
| Female | 1997 | 1.4 | 0.2   | 2.6  | Malta       |
| Female | 1998 | 1.1 | 0.0   | 2.2  | Malta       |
| Female | 1999 | 0.4 | (0.4) | 1.2  | Malta       |
| Female | 2000 | 0.2 | (0.2) | 0.6  | Malta       |
| Female | 2001 | 0.5 | (0.2) | 1.2  | Malta       |
| Female | 2002 | 0.7 | (0.1) | 1.5  | Malta       |
| Female | 2003 | 0.8 | 0.0   | 1.6  | Malta       |
| Female | 2004 | 0.5 | (0.2) | 1.2  | Malta       |
| Female | 2005 | 2.1 | 0.6   | 3.6  | Malta       |
| Female | 2007 | 1.0 | 0.1   | 1.9  | Malta       |
| Female | 2008 | 0.3 | (0.0) | 0.6  | Malta       |
| Female | 2009 | 0.9 | 0.2   | 1.6  | Malta       |
| Female | 2010 | 0.8 | (0.1) | 1.7  | Malta       |
| Female | 2011 | 1.1 | 0.0   | 2.2  | Malta       |
| Female | 2012 | 0.9 | 0.1   | 1.7  | Malta       |
| Male   | 1989 | 4.7 | 4.3   | 5.1  | Netherlands |
| Male   | 1990 | 5.4 | 4.9   | 5.9  | Netherlands |
| Male   | 1991 | 5.4 | 4.9   | 5.9  | Netherlands |
| Male   | 1992 | 5.7 | 5.2   | 6.2  | Netherlands |
| Male   | 1993 | 6.0 | 5.5   | 6.5  | Netherlands |
| Male   | 1994 | 6.3 | 5.8   | 6.8  | Netherlands |
| Male   | 1995 | 6.3 | 5.8   | 6.8  | Netherlands |
| Male   | 1996 | 6.4 | 5.9   | 6.9  | Netherlands |
| Male   | 1997 | 6.4 | 5.9   | 6.9  | Netherlands |
| Male   | 1998 | 7.0 | 6.5   | 7.5  | Netherlands |
| Male   | 1999 | 7.3 | 6.8   | 7.8  | Netherlands |
| Male   | 2000 | 7.0 | 6.5   | 7.5  | Netherlands |
| Male   | 2001 | 7.1 | 6.6   | 7.6  | Netherlands |
| Male   | 2002 | 8.3 | 7.8   | 8.8  | Netherlands |
| Male   | 2003 | 8.3 | 7.8   | 8.8  | Netherlands |
| Male   | 2004 | 8.5 | 8.0   | 9.0  | Netherlands |
| Male   | 2005 | 8.5 | 8.0   | 9.0  | Netherlands |
| Male   | 2006 | 8.7 | 8.2   | 9.2  | Netherlands |
| Male   | 2007 | 8.9 | 8.4   | 9.4  | Netherlands |
| Male   | 2008 | 9.8 | 9.3   | 10.3 | Netherlands |
| Male   | 2009 | 9.9 | 9.4   | 10.4 | Netherlands |
| Male   | 2010 | 9.7 | 9.2   | 10.2 | Netherlands |
| Male   | 2011 | 9.8 | 9.3   | 10.3 | Netherlands |
| Male   | 2012 | 9.6 | 9.1   | 10.1 | Netherlands |
| Female | 1989 | 1.5 | 1.3   | 1.7  | Netherlands |
| Female | 1990 | 2.1 | 1.9   | 2.3  | Netherlands |
| Female | 1991 | 2.1 | 1.9   | 2.3  | Netherlands |



|        |      |     |       |     |             |
|--------|------|-----|-------|-----|-------------|
| Female | 1992 | 1.9 | 1.7   | 2.1 | Netherlands |
| Female | 1993 | 2.1 | 1.9   | 2.3 | Netherlands |
| Female | 1994 | 2.2 | 2.0   | 2.4 | Netherlands |
| Female | 1995 | 2.4 | 2.1   | 2.7 | Netherlands |
| Female | 1996 | 2.5 | 2.2   | 2.8 | Netherlands |
| Female | 1997 | 2.1 | 1.9   | 2.3 | Netherlands |
| Female | 1998 | 2.2 | 2.0   | 2.4 | Netherlands |
| Female | 1999 | 2.2 | 2.0   | 2.4 | Netherlands |
| Female | 2000 | 2.2 | 2.0   | 2.4 | Netherlands |
| Female | 2001 | 2.3 | 2.1   | 2.5 | Netherlands |
| Female | 2002 | 2.5 | 2.3   | 2.7 | Netherlands |
| Female | 2003 | 2.6 | 2.4   | 2.8 | Netherlands |
| Female | 2004 | 2.6 | 2.4   | 2.8 | Netherlands |
| Female | 2005 | 2.5 | 2.3   | 2.7 | Netherlands |
| Female | 2006 | 2.6 | 2.4   | 2.8 | Netherlands |
| Female | 2007 | 2.6 | 2.4   | 2.8 | Netherlands |
| Female | 2008 | 2.8 | 2.6   | 3.0 | Netherlands |
| Female | 2009 | 3.1 | 2.8   | 3.4 | Netherlands |
| Female | 2010 | 2.8 | 2.6   | 3.0 | Netherlands |
| Female | 2011 | 3.1 | 2.8   | 3.4 | Netherlands |
| Female | 2012 | 2.8 | 2.6   | 3.0 | Netherlands |
| Male   | 1998 | 2.6 | 1.4   | 3.8 | Poland      |
| Male   | 1999 | 5.0 | 3.5   | 6.5 | Poland      |
| Male   | 2000 | 4.5 | 3.1   | 5.9 | Poland      |
| Male   | 2001 | 3.8 | 2.5   | 5.1 | Poland      |
| Male   | 2002 | 4.1 | 2.8   | 5.4 | Poland      |
| Male   | 2003 | 4.0 | 2.7   | 5.3 | Poland      |
| Male   | 2004 | 3.7 | 2.4   | 5.0 | Poland      |
| Male   | 2005 | 2.5 | 1.4   | 3.6 | Poland      |
| Male   | 2006 | 4.3 | 3.0   | 5.6 | Poland      |
| Male   | 2007 | 3.5 | 2.2   | 4.8 | Poland      |
| Male   | 2008 | 4.3 | 3.0   | 5.6 | Poland      |
| Male   | 2009 | 3.7 | 2.5   | 4.9 | Poland      |
| Male   | 2010 | 4.3 | 3.0   | 5.6 | Poland      |
| Male   | 2011 | 3.6 | 2.5   | 4.7 | Poland      |
| Male   | 2012 | 3.3 | 2.2   | 4.4 | Poland      |
| Female | 1998 | 0.7 | 0.2   | 1.2 | Poland      |
| Female | 1999 | 0.5 | 0.1   | 0.9 | Poland      |
| Female | 2000 | 0.6 | 0.2   | 1.0 | Poland      |
| Female | 2001 | 0.2 | (0.0) | 0.4 | Poland      |
| Female | 2002 | 0.9 | 0.4   | 1.4 | Poland      |
| Female | 2003 | 0.6 | 0.1   | 1.1 | Poland      |
| Female | 2004 | 0.1 | (0.0) | 0.2 | Poland      |
| Female | 2005 | 0.5 | 0.1   | 0.9 | Poland      |
| Female | 2006 | 0.6 | 0.2   | 1.0 | Poland      |
| Female | 2007 | 0.6 | 0.2   | 1.0 | Poland      |

|        |      |     |       |     |          |
|--------|------|-----|-------|-----|----------|
| Female | 2008 | 0.3 | 0.0   | 0.6 | Poland   |
| Female | 2009 | 0.3 | 0.0   | 0.6 | Poland   |
| Female | 2010 | 0.2 | (0.1) | 0.5 | Poland   |
| Female | 2011 | 0.5 | 0.2   | 0.8 | Poland   |
| Female | 2012 | 0.6 | 0.2   | 1.0 | Poland   |
| Male   | 1983 | 7.8 | 6.1   | 9.5 | Slovenia |
| Male   | 1984 | 8.0 | 6.3   | 9.7 | Slovenia |
| Male   | 1985 | 6.6 | 5.0   | 8.2 | Slovenia |
| Male   | 1986 | 7.4 | 5.8   | 9.0 | Slovenia |
| Male   | 1987 | 8.1 | 6.4   | 9.8 | Slovenia |
| Male   | 1988 | 6.3 | 4.8   | 7.8 | Slovenia |
| Male   | 1989 | 6.9 | 5.4   | 8.4 | Slovenia |
| Male   | 1990 | 6.5 | 5.1   | 7.9 | Slovenia |
| Male   | 1991 | 7.1 | 5.6   | 8.6 | Slovenia |
| Male   | 1992 | 7.7 | 6.1   | 9.3 | Slovenia |
| Male   | 1993 | 5.8 | 4.4   | 7.2 | Slovenia |
| Male   | 1994 | 7.1 | 5.6   | 8.6 | Slovenia |
| Male   | 1995 | 5.6 | 4.3   | 6.9 | Slovenia |
| Male   | 1996 | 6.6 | 5.2   | 8.0 | Slovenia |
| Male   | 1997 | 6.2 | 4.8   | 7.6 | Slovenia |
| Male   | 1998 | 4.7 | 3.5   | 5.9 | Slovenia |
| Male   | 1999 | 6.0 | 4.7   | 7.3 | Slovenia |
| Male   | 2000 | 5.1 | 3.9   | 6.3 | Slovenia |
| Male   | 2001 | 5.9 | 4.6   | 7.2 | Slovenia |
| Male   | 2002 | 5.5 | 4.3   | 6.7 | Slovenia |
| Male   | 2003 | 5.5 | 4.3   | 6.7 | Slovenia |
| Male   | 2004 | 4.7 | 3.6   | 5.8 | Slovenia |
| Male   | 2005 | 5.0 | 3.9   | 6.1 | Slovenia |
| Male   | 2006 | 4.3 | 3.3   | 5.3 | Slovenia |
| Male   | 2007 | 5.0 | 3.9   | 6.1 | Slovenia |
| Male   | 2008 | 3.4 | 2.5   | 4.3 | Slovenia |
| Male   | 2009 | 4.4 | 3.4   | 5.4 | Slovenia |
| Male   | 2010 | 3.5 | 2.6   | 4.4 | Slovenia |
| Male   | 2011 | 4.1 | 3.1   | 5.1 | Slovenia |
| Male   | 2012 | 4.0 | 3.1   | 4.9 | Slovenia |
| Female | 1983 | 1.2 | 0.6   | 1.8 | Slovenia |
| Female | 1984 | 0.8 | 0.4   | 1.2 | Slovenia |
| Female | 1985 | 0.5 | 0.2   | 0.8 | Slovenia |
| Female | 1986 | 0.6 | 0.2   | 1.0 | Slovenia |
| Female | 1987 | 0.6 | 0.3   | 0.9 | Slovenia |
| Female | 1988 | 1.1 | 0.6   | 1.6 | Slovenia |
| Female | 1989 | 0.4 | 0.2   | 0.6 | Slovenia |
| Female | 1990 | 0.9 | 0.4   | 1.4 | Slovenia |
| Female | 1991 | 1.0 | 0.5   | 1.5 | Slovenia |
| Female | 1992 | 0.9 | 0.5   | 1.3 | Slovenia |
| Female | 1993 | 0.5 | 0.2   | 0.8 | Slovenia |

|        |      |     |     |     |          |
|--------|------|-----|-----|-----|----------|
| Female | 1994 | 0.6 | 0.3 | 0.9 | Slovenia |
| Female | 1995 | 0.7 | 0.4 | 1.0 | Slovenia |
| Female | 1996 | 0.6 | 0.2 | 1.0 | Slovenia |
| Female | 1997 | 0.7 | 0.3 | 1.1 | Slovenia |
| Female | 1998 | 0.8 | 0.4 | 1.2 | Slovenia |
| Female | 1999 | 1.1 | 0.6 | 1.6 | Slovenia |
| Female | 2000 | 0.6 | 0.3 | 0.9 | Slovenia |
| Female | 2001 | 0.8 | 0.4 | 1.2 | Slovenia |
| Female | 2002 | 1.0 | 0.6 | 1.4 | Slovenia |
| Female | 2003 | 0.9 | 0.5 | 1.3 | Slovenia |
| Female | 2004 | 0.4 | 0.2 | 0.6 | Slovenia |
| Female | 2005 | 0.8 | 0.4 | 1.2 | Slovenia |
| Female | 2006 | 0.7 | 0.4 | 1.0 | Slovenia |
| Female | 2007 | 0.7 | 0.3 | 1.1 | Slovenia |
| Female | 2008 | 0.7 | 0.4 | 1.0 | Slovenia |
| Female | 2009 | 0.5 | 0.2 | 0.8 | Slovenia |
| Female | 2010 | 0.6 | 0.3 | 0.9 | Slovenia |
| Female | 2011 | 0.8 | 0.4 | 1.2 | Slovenia |
| Female | 2012 | 0.6 | 0.3 | 0.9 | Slovenia |
| Male   | 1993 | 6.8 | 6.1 | 7.5 | Spain    |
| Male   | 1994 | 7.2 | 6.5 | 7.9 | Spain    |
| Male   | 1995 | 7.1 | 6.4 | 7.8 | Spain    |
| Male   | 1996 | 6.7 | 6.0 | 7.4 | Spain    |
| Male   | 1997 | 6.9 | 6.2 | 7.6 | Spain    |
| Male   | 1998 | 6.7 | 6.0 | 7.4 | Spain    |
| Male   | 1999 | 6.1 | 5.5 | 6.7 | Spain    |
| Male   | 2000 | 6.8 | 6.1 | 7.5 | Spain    |
| Male   | 2001 | 6.1 | 5.5 | 6.7 | Spain    |
| Male   | 2002 | 6.1 | 5.5 | 6.7 | Spain    |
| Male   | 2003 | 6.0 | 5.4 | 6.6 | Spain    |
| Male   | 2004 | 5.4 | 4.8 | 6.0 | Spain    |
| Male   | 2005 | 5.9 | 5.3 | 6.5 | Spain    |
| Male   | 2006 | 5.3 | 4.8 | 5.8 | Spain    |
| Male   | 2007 | 6.0 | 5.4 | 6.6 | Spain    |
| Male   | 2008 | 5.1 | 4.6 | 5.6 | Spain    |
| Male   | 2009 | 5.0 | 4.5 | 5.5 | Spain    |
| Male   | 2010 | 5.1 | 4.6 | 5.6 | Spain    |
| Female | 1993 | 0.6 | 0.4 | 0.8 | Spain    |
| Female | 1994 | 0.8 | 0.6 | 1.0 | Spain    |
| Female | 1995 | 0.6 | 0.4 | 0.8 | Spain    |
| Female | 1996 | 0.8 | 0.6 | 1.0 | Spain    |
| Female | 1997 | 0.6 | 0.4 | 0.8 | Spain    |
| Female | 1998 | 0.7 | 0.5 | 0.9 | Spain    |
| Female | 1999 | 0.6 | 0.4 | 0.8 | Spain    |
| Female | 2000 | 0.6 | 0.4 | 0.8 | Spain    |
| Female | 2001 | 0.7 | 0.5 | 0.9 | Spain    |

|        |      |     |     |     |                |
|--------|------|-----|-----|-----|----------------|
| Female | 2002 | 0.7 | 0.5 | 0.9 | Spain          |
| Female | 2003 | 0.6 | 0.4 | 0.8 | Spain          |
| Female | 2004 | 0.7 | 0.5 | 0.9 | Spain          |
| Female | 2005 | 0.7 | 0.5 | 0.9 | Spain          |
| Female | 2006 | 0.7 | 0.5 | 0.9 | Spain          |
| Female | 2007 | 0.8 | 0.6 | 1.0 | Spain          |
| Female | 2008 | 0.8 | 0.6 | 1.0 | Spain          |
| Female | 2009 | 1.0 | 0.8 | 1.2 | Spain          |
| Female | 2010 | 0.8 | 0.6 | 1.0 | Spain          |
| Male   | 1998 | 7.1 | 5.8 | 8.4 | Switzerland    |
| Male   | 1999 | 8.0 | 6.6 | 9.4 | Switzerland    |
| Male   | 2000 | 8.4 | 7.1 | 9.7 | Switzerland    |
| Male   | 2001 | 6.3 | 5.1 | 7.5 | Switzerland    |
| Male   | 2002 | 7.3 | 6.1 | 8.5 | Switzerland    |
| Male   | 2003 | 7.3 | 6.1 | 8.5 | Switzerland    |
| Male   | 2004 | 7.6 | 6.4 | 8.8 | Switzerland    |
| Male   | 2005 | 6.9 | 5.7 | 8.1 | Switzerland    |
| Male   | 2006 | 6.0 | 5.0 | 7.0 | Switzerland    |
| Male   | 2007 | 6.9 | 5.8 | 8.0 | Switzerland    |
| Male   | 2008 | 6.4 | 5.3 | 7.5 | Switzerland    |
| Male   | 2009 | 6.5 | 5.4 | 7.6 | Switzerland    |
| Male   | 2010 | 6.1 | 5.1 | 7.1 | Switzerland    |
| Male   | 2011 | 6.8 | 5.7 | 7.9 | Switzerland    |
| Male   | 2012 | 5.5 | 4.5 | 6.5 | Switzerland    |
| Female | 1998 | 1.2 | 0.8 | 1.6 | Switzerland    |
| Female | 1999 | 1.6 | 1.1 | 2.1 | Switzerland    |
| Female | 2000 | 1.6 | 1.1 | 2.1 | Switzerland    |
| Female | 2001 | 1.9 | 1.3 | 2.5 | Switzerland    |
| Female | 2002 | 1.9 | 1.4 | 2.4 | Switzerland    |
| Female | 2003 | 1.7 | 1.2 | 2.2 | Switzerland    |
| Female | 2004 | 1.3 | 0.9 | 1.7 | Switzerland    |
| Female | 2005 | 1.8 | 1.3 | 2.3 | Switzerland    |
| Female | 2006 | 1.9 | 1.4 | 2.4 | Switzerland    |
| Female | 2007 | 1.7 | 1.2 | 2.2 | Switzerland    |
| Female | 2008 | 1.4 | 1.0 | 1.8 | Switzerland    |
| Female | 2009 | 1.9 | 1.4 | 2.4 | Switzerland    |
| Female | 2010 | 2.1 | 1.5 | 2.7 | Switzerland    |
| Female | 2011 | 1.6 | 1.2 | 2.0 | Switzerland    |
| Female | 2012 | 2.0 | 1.5 | 2.5 | Switzerland    |
| Male   | 1995 | 8.1 | 7.8 | 8.4 | United Kingdom |
| Male   | 1996 | 8.2 | 7.9 | 8.5 | United Kingdom |
| Male   | 1997 | 8.5 | 8.2 | 8.8 | United Kingdom |
| Male   | 1998 | 8.3 | 8.0 | 8.6 | United Kingdom |
| Male   | 1999 | 8.4 | 8.1 | 8.7 | United Kingdom |
| Male   | 2000 | 8.8 | 8.5 | 9.1 | United Kingdom |
| Male   | 2001 | 9.0 | 8.7 | 9.3 | United Kingdom |

|        |      |     |     |      |                |
|--------|------|-----|-----|------|----------------|
| Male   | 2002 | 9.1 | 8.8 | 9.4  | United Kingdom |
| Male   | 2003 | 9.1 | 8.8 | 9.4  | United Kingdom |
| Male   | 2004 | 9.1 | 8.8 | 9.4  | United Kingdom |
| Male   | 2005 | 9.2 | 8.9 | 9.5  | United Kingdom |
| Male   | 2006 | 9.2 | 8.9 | 9.5  | United Kingdom |
| Male   | 2007 | 9.5 | 9.2 | 9.8  | United Kingdom |
| Male   | 2008 | 9.8 | 9.5 | 10.1 | United Kingdom |
| Male   | 2009 | 9.6 | 9.3 | 9.9  | United Kingdom |
| Male   | 2010 | 9.7 | 9.4 | 10.0 | United Kingdom |
| Male   | 2011 | 9.5 | 9.2 | 9.8  | United Kingdom |
| Male   | 2012 | 9.8 | 9.5 | 10.1 | United Kingdom |
| Female | 1995 | 3.5 | 3.4 | 3.6  | United Kingdom |
| Female | 1996 | 3.4 | 3.3 | 3.5  | United Kingdom |
| Female | 1997 | 3.5 | 3.4 | 3.6  | United Kingdom |
| Female | 1998 | 3.5 | 3.4 | 3.6  | United Kingdom |
| Female | 1999 | 3.7 | 3.5 | 3.9  | United Kingdom |
| Female | 2000 | 3.6 | 3.5 | 3.7  | United Kingdom |
| Female | 2001 | 3.6 | 3.5 | 3.7  | United Kingdom |
| Female | 2002 | 3.5 | 3.4 | 3.6  | United Kingdom |
| Female | 2003 | 3.5 | 3.4 | 3.6  | United Kingdom |
| Female | 2004 | 3.4 | 3.3 | 3.5  | United Kingdom |
| Female | 2005 | 3.5 | 3.4 | 3.6  | United Kingdom |
| Female | 2006 | 3.6 | 3.5 | 3.7  | United Kingdom |
| Female | 2007 | 3.5 | 3.4 | 3.6  | United Kingdom |
| Female | 2008 | 3.5 | 3.4 | 3.6  | United Kingdom |
| Female | 2009 | 3.4 | 3.3 | 3.5  | United Kingdom |
| Female | 2010 | 3.4 | 3.3 | 3.5  | United Kingdom |
| Female | 2011 | 3.4 | 3.3 | 3.5  | United Kingdom |
| Female | 2012 | 3.5 | 3.4 | 3.6  | United Kingdom |
| Male   | 1993 | 5.0 | 4.6 | 5.4  | Australia      |
| Male   | 1994 | 5.3 | 4.9 | 5.7  | Australia      |
| Male   | 1995 | 5.0 | 4.6 | 5.4  | Australia      |
| Male   | 1996 | 5.1 | 4.7 | 5.5  | Australia      |
| Male   | 1997 | 4.8 | 4.4 | 5.2  | Australia      |
| Male   | 1998 | 4.7 | 4.3 | 5.1  | Australia      |
| Male   | 1999 | 5.3 | 4.9 | 5.7  | Australia      |
| Male   | 2000 | 5.2 | 4.8 | 5.6  | Australia      |
| Male   | 2001 | 4.9 | 4.5 | 5.3  | Australia      |
| Male   | 2002 | 5.0 | 4.6 | 5.4  | Australia      |
| Male   | 2003 | 5.0 | 4.6 | 5.4  | Australia      |
| Male   | 2004 | 5.3 | 4.9 | 5.7  | Australia      |
| Male   | 2005 | 5.0 | 4.7 | 5.3  | Australia      |
| Male   | 2006 | 5.2 | 4.8 | 5.6  | Australia      |
| Male   | 2007 | 5.1 | 4.8 | 5.4  | Australia      |
| Male   | 2008 | 5.4 | 5.0 | 5.8  | Australia      |
| Male   | 2009 | 5.2 | 4.9 | 5.5  | Australia      |

|        |      |     |     |     |             |
|--------|------|-----|-----|-----|-------------|
| Male   | 2010 | 5.5 | 5.2 | 5.8 | Australia   |
| Male   | 2011 | 5.3 | 5.0 | 5.6 | Australia   |
| Male   | 2012 | 5.2 | 4.9 | 5.5 | Australia   |
| Female | 1993 | 2.2 | 2.0 | 2.4 | Australia   |
| Female | 1994 | 2.1 | 1.9 | 2.3 | Australia   |
| Female | 1995 | 2.2 | 2.0 | 2.4 | Australia   |
| Female | 1996 | 2.1 | 1.9 | 2.3 | Australia   |
| Female | 1997 | 2.0 | 1.8 | 2.2 | Australia   |
| Female | 1998 | 2.1 | 1.9 | 2.3 | Australia   |
| Female | 1999 | 2.1 | 1.9 | 2.3 | Australia   |
| Female | 2000 | 1.9 | 1.7 | 2.1 | Australia   |
| Female | 2001 | 2.0 | 1.8 | 2.2 | Australia   |
| Female | 2002 | 1.8 | 1.6 | 2.0 | Australia   |
| Female | 2003 | 1.9 | 1.7 | 2.1 | Australia   |
| Female | 2004 | 1.9 | 1.7 | 2.1 | Australia   |
| Female | 2005 | 1.7 | 1.5 | 1.9 | Australia   |
| Female | 2006 | 1.6 | 1.4 | 1.8 | Australia   |
| Female | 2007 | 1.7 | 1.5 | 1.9 | Australia   |
| Female | 2008 | 1.7 | 1.5 | 1.9 | Australia   |
| Female | 2009 | 1.6 | 1.4 | 1.8 | Australia   |
| Female | 2010 | 1.8 | 1.6 | 2.0 | Australia   |
| Female | 2011 | 1.7 | 1.5 | 1.9 | Australia   |
| Female | 2012 | 1.6 | 1.4 | 1.8 | Australia   |
| Male   | 1983 | 5.3 | 4.3 | 6.3 | New Zealand |
| Male   | 1984 | 4.8 | 3.8 | 5.8 | New Zealand |
| Male   | 1985 | 6.0 | 4.9 | 7.1 | New Zealand |
| Male   | 1986 | 4.3 | 3.4 | 5.2 | New Zealand |
| Male   | 1987 | 6.1 | 5.0 | 7.2 | New Zealand |
| Male   | 1988 | 5.1 | 4.1 | 6.1 | New Zealand |
| Male   | 1989 | 5.9 | 4.8 | 7.0 | New Zealand |
| Male   | 1990 | 6.9 | 5.7 | 8.1 | New Zealand |
| Male   | 1991 | 5.3 | 4.3 | 6.3 | New Zealand |
| Male   | 1992 | 3.9 | 3.1 | 4.7 | New Zealand |
| Male   | 1993 | 6.1 | 5.1 | 7.1 | New Zealand |
| Male   | 1994 | 5.6 | 4.6 | 6.6 | New Zealand |
| Male   | 1995 | 6.2 | 5.2 | 7.2 | New Zealand |
| Male   | 1996 | 5.0 | 4.1 | 5.9 | New Zealand |
| Male   | 1997 | 5.6 | 4.7 | 6.5 | New Zealand |
| Male   | 1998 | 4.0 | 3.2 | 4.8 | New Zealand |
| Male   | 1999 | 5.6 | 4.7 | 6.5 | New Zealand |
| Male   | 2000 | 5.5 | 4.6 | 6.4 | New Zealand |
| Male   | 2001 | 5.3 | 4.4 | 6.2 | New Zealand |
| Male   | 2002 | 5.4 | 4.5 | 6.3 | New Zealand |
| Male   | 2003 | 5.7 | 4.8 | 6.6 | New Zealand |
| Male   | 2004 | 6.0 | 5.1 | 6.9 | New Zealand |
| Male   | 2005 | 4.9 | 4.1 | 5.7 | New Zealand |

|        |      |     |     |     |             |
|--------|------|-----|-----|-----|-------------|
| Male   | 2006 | 5.3 | 4.5 | 6.1 | New Zealand |
| Male   | 2007 | 5.7 | 4.9 | 6.5 | New Zealand |
| Male   | 2008 | 5.7 | 4.9 | 6.5 | New Zealand |
| Male   | 2009 | 4.8 | 4.1 | 5.5 | New Zealand |
| Male   | 2010 | 5.6 | 4.8 | 6.4 | New Zealand |
| Male   | 2011 | 5.1 | 4.4 | 5.8 | New Zealand |
| Male   | 2012 | 5.7 | 4.9 | 6.5 | New Zealand |
| Female | 1983 | 2.7 | 2.0 | 3.4 | New Zealand |
| Female | 1984 | 2.1 | 1.5 | 2.7 | New Zealand |
| Female | 1985 | 1.9 | 1.4 | 2.4 | New Zealand |
| Female | 1986 | 2.6 | 2.0 | 3.2 | New Zealand |
| Female | 1987 | 2.3 | 1.7 | 2.9 | New Zealand |
| Female | 1988 | 2.1 | 1.6 | 2.6 | New Zealand |
| Female | 1989 | 2.5 | 1.9 | 3.1 | New Zealand |
| Female | 1990 | 2.1 | 1.6 | 2.6 | New Zealand |
| Female | 1991 | 3.0 | 2.4 | 3.6 | New Zealand |
| Female | 1992 | 2.0 | 1.5 | 2.5 | New Zealand |
| Female | 1993 | 2.2 | 1.7 | 2.7 | New Zealand |
| Female | 1994 | 2.6 | 2.1 | 3.1 | New Zealand |
| Female | 1995 | 1.9 | 1.4 | 2.4 | New Zealand |
| Female | 1996 | 2.2 | 1.7 | 2.7 | New Zealand |
| Female | 1997 | 1.7 | 1.3 | 2.1 | New Zealand |
| Female | 1998 | 1.5 | 1.1 | 1.9 | New Zealand |
| Female | 1999 | 2.0 | 1.5 | 2.5 | New Zealand |
| Female | 2000 | 2.0 | 1.6 | 2.4 | New Zealand |
| Female | 2001 | 1.9 | 1.5 | 2.3 | New Zealand |
| Female | 2002 | 2.2 | 1.7 | 2.7 | New Zealand |
| Female | 2003 | 2.5 | 2.0 | 3.0 | New Zealand |
| Female | 2004 | 1.8 | 1.4 | 2.2 | New Zealand |
| Female | 2005 | 1.7 | 1.3 | 2.1 | New Zealand |
| Female | 2006 | 2.4 | 1.9 | 2.9 | New Zealand |
| Female | 2007 | 1.7 | 1.3 | 2.1 | New Zealand |
| Female | 2008 | 2.0 | 1.6 | 2.4 | New Zealand |
| Female | 2009 | 2.0 | 1.6 | 2.4 | New Zealand |
| Female | 2010 | 2.1 | 1.7 | 2.5 | New Zealand |
| Female | 2011 | 1.8 | 1.4 | 2.2 | New Zealand |
| Female | 2012 | 2.1 | 1.7 | 2.5 | New Zealand |
| Female | 1943 | 2.4 | 1.8 | 3.0 | Denmark     |
| Female | 1944 | 2.6 | 1.9 | 3.3 | Denmark     |
| Female | 1945 | 2.3 | 1.7 | 2.9 | Denmark     |
| Female | 1946 | 2.5 | 1.9 | 3.1 | Denmark     |
| Female | 1947 | 2.7 | 2.1 | 3.3 | Denmark     |
| Female | 1948 | 1.9 | 1.4 | 2.4 | Denmark     |
| Female | 1949 | 1.3 | 0.9 | 1.7 | Denmark     |
| Female | 1950 | 1.9 | 1.4 | 2.4 | Denmark     |
| Female | 1951 | 1.8 | 1.3 | 2.3 | Denmark     |

|        |      |     |     |     |         |
|--------|------|-----|-----|-----|---------|
| Female | 1952 | 1.7 | 1.2 | 2.2 | Denmark |
| Female | 1953 | 1.9 | 1.4 | 2.4 | Denmark |
| Female | 1954 | 1.5 | 1.1 | 1.9 | Denmark |
| Female | 1955 | 1.4 | 1.0 | 1.8 | Denmark |
| Female | 1956 | 1.4 | 1.0 | 1.8 | Denmark |
| Female | 1957 | 1.5 | 1.1 | 1.9 | Denmark |
| Female | 1958 | 1.4 | 1.0 | 1.8 | Denmark |
| Female | 1959 | 1.4 | 1.0 | 1.8 | Denmark |
| Female | 1960 | 1.0 | 0.7 | 1.3 | Denmark |
| Female | 1961 | 1.3 | 0.9 | 1.7 | Denmark |
| Female | 1962 | 1.0 | 0.7 | 1.3 | Denmark |
| Female | 1963 | 1.3 | 0.9 | 1.7 | Denmark |
| Female | 1964 | 1.2 | 0.9 | 1.5 | Denmark |
| Female | 1965 | 1.4 | 1.0 | 1.8 | Denmark |
| Female | 1966 | 1.2 | 0.9 | 1.5 | Denmark |
| Female | 1967 | 1.4 | 1.1 | 1.7 | Denmark |
| Female | 1968 | 1.3 | 1.0 | 1.6 | Denmark |
| Female | 1969 | 1.5 | 1.1 | 1.9 | Denmark |
| Female | 1970 | 1.4 | 1.0 | 1.8 | Denmark |
| Female | 1971 | 1.0 | 0.7 | 1.3 | Denmark |
| Female | 1972 | 1.0 | 0.7 | 1.3 | Denmark |
| Female | 1973 | 1.1 | 0.8 | 1.4 | Denmark |
| Female | 1974 | 1.1 | 0.8 | 1.4 | Denmark |
| Female | 1975 | 1.2 | 0.9 | 1.5 | Denmark |
| Female | 1976 | 1.3 | 1.0 | 1.6 | Denmark |
| Female | 1977 | 1.2 | 0.9 | 1.5 | Denmark |
| Female | 1978 | 1.1 | 0.8 | 1.4 | Denmark |
| Female | 1979 | 1.1 | 0.8 | 1.4 | Denmark |
| Female | 1980 | 1.3 | 1.0 | 1.6 | Denmark |
| Female | 1981 | 1.2 | 0.9 | 1.5 | Denmark |
| Female | 1982 | 1.3 | 1.0 | 1.6 | Denmark |
| Female | 1983 | 1.2 | 0.9 | 1.5 | Denmark |
| Female | 1984 | 1.0 | 0.7 | 1.2 | Denmark |
| Female | 1985 | 1.2 | 0.9 | 1.5 | Denmark |
| Female | 1986 | 1.4 | 1.1 | 1.7 | Denmark |
| Female | 1987 | 1.5 | 1.2 | 1.8 | Denmark |
| Female | 1988 | 1.4 | 1.1 | 1.7 | Denmark |
| Female | 1989 | 1.3 | 1.0 | 1.6 | Denmark |
| Female | 1990 | 1.4 | 1.1 | 1.7 | Denmark |
| Female | 1991 | 1.4 | 1.1 | 1.7 | Denmark |
| Female | 1992 | 1.5 | 1.2 | 1.8 | Denmark |
| Female | 1993 | 1.5 | 1.2 | 1.8 | Denmark |
| Female | 1994 | 1.8 | 1.4 | 2.2 | Denmark |
| Female | 1995 | 1.7 | 1.3 | 2.1 | Denmark |
| Female | 1996 | 1.8 | 1.4 | 2.2 | Denmark |
| Female | 1997 | 2.0 | 1.6 | 2.4 | Denmark |



|        |      |     |     |     |         |
|--------|------|-----|-----|-----|---------|
| Female | 1998 | 1.7 | 1.4 | 2.0 | Denmark |
| Female | 1999 | 1.9 | 1.5 | 2.3 | Denmark |
| Female | 2000 | 1.8 | 1.5 | 2.1 | Denmark |
| Female | 2001 | 2.1 | 1.7 | 2.5 | Denmark |
| Female | 2002 | 2.0 | 1.6 | 2.4 | Denmark |
| Female | 2003 | 1.7 | 1.4 | 2.0 | Denmark |
| Female | 2004 | 2.2 | 1.8 | 2.6 | Denmark |
| Female | 2005 | 2.0 | 1.6 | 2.4 | Denmark |
| Female | 2006 | 2.4 | 2.0 | 2.8 | Denmark |
| Female | 2007 | 1.9 | 1.5 | 2.3 | Denmark |
| Female | 2008 | 1.9 | 1.6 | 2.2 | Denmark |
| Female | 2009 | 1.8 | 1.5 | 2.1 | Denmark |
| Female | 2010 | 1.9 | 1.6 | 2.2 | Denmark |
| Female | 2011 | 2.2 | 1.8 | 2.6 | Denmark |
| Female | 2012 | 2.4 | 2.0 | 2.8 | Denmark |
| Female | 2013 | 1.9 | 1.6 | 2.2 | Denmark |
| Female | 2014 | 2.2 | 1.8 | 2.6 | Denmark |
| Female | 2015 | 1.9 | 1.6 | 2.2 | Denmark |
| Female | 2016 | 2.4 | 2.0 | 2.8 | Denmark |
| Female | 2017 | 2.4 | 2.0 | 2.8 | Denmark |
| Female | 2018 | 2.3 | 1.9 | 2.7 | Denmark |
| Female | 2019 | 2.1 | 1.8 | 2.4 | Denmark |
| Male   | 1943 | 6.9 | 5.8 | 8.0 | Denmark |
| Male   | 1944 | 4.6 | 3.7 | 5.5 | Denmark |
| Male   | 1945 | 5.9 | 4.9 | 6.9 | Denmark |
| Male   | 1946 | 4.0 | 3.2 | 4.8 | Denmark |
| Male   | 1947 | 4.6 | 3.7 | 5.5 | Denmark |
| Male   | 1948 | 4.3 | 3.5 | 5.1 | Denmark |
| Male   | 1949 | 4.3 | 3.5 | 5.1 | Denmark |
| Male   | 1950 | 4.0 | 3.2 | 4.8 | Denmark |
| Male   | 1951 | 4.2 | 3.4 | 5.0 | Denmark |
| Male   | 1952 | 3.4 | 2.7 | 4.1 | Denmark |
| Male   | 1953 | 3.4 | 2.7 | 4.1 | Denmark |
| Male   | 1954 | 3.0 | 2.4 | 3.6 | Denmark |
| Male   | 1955 | 3.0 | 2.4 | 3.6 | Denmark |
| Male   | 1956 | 2.7 | 2.1 | 3.3 | Denmark |
| Male   | 1957 | 2.7 | 2.1 | 3.3 | Denmark |
| Male   | 1958 | 2.6 | 2.0 | 3.2 | Denmark |
| Male   | 1959 | 3.0 | 2.4 | 3.6 | Denmark |
| Male   | 1960 | 2.5 | 2.0 | 3.0 | Denmark |
| Male   | 1961 | 2.5 | 1.9 | 3.1 | Denmark |
| Male   | 1962 | 2.4 | 1.9 | 2.9 | Denmark |
| Male   | 1963 | 3.0 | 2.4 | 3.6 | Denmark |
| Male   | 1964 | 2.3 | 1.8 | 2.8 | Denmark |
| Male   | 1965 | 2.7 | 2.1 | 3.3 | Denmark |
| Male   | 1966 | 2.7 | 2.1 | 3.3 | Denmark |

|      |      |     |     |     |         |
|------|------|-----|-----|-----|---------|
| Male | 1967 | 3.0 | 2.4 | 3.6 | Denmark |
| Male | 1968 | 2.8 | 2.2 | 3.4 | Denmark |
| Male | 1969 | 3.1 | 2.5 | 3.7 | Denmark |
| Male | 1970 | 2.6 | 2.1 | 3.1 | Denmark |
| Male | 1971 | 2.5 | 2.0 | 3.0 | Denmark |
| Male | 1972 | 2.4 | 1.9 | 2.9 | Denmark |
| Male | 1973 | 3.1 | 2.5 | 3.7 | Denmark |
| Male | 1974 | 3.1 | 2.5 | 3.7 | Denmark |
| Male | 1975 | 2.5 | 2.0 | 3.0 | Denmark |
| Male | 1976 | 2.7 | 2.2 | 3.2 | Denmark |
| Male | 1977 | 3.1 | 2.5 | 3.7 | Denmark |
| Male | 1978 | 2.7 | 2.2 | 3.2 | Denmark |
| Male | 1979 | 2.9 | 2.4 | 3.4 | Denmark |
| Male | 1980 | 3.0 | 2.4 | 3.6 | Denmark |
| Male | 1981 | 2.9 | 2.4 | 3.4 | Denmark |
| Male | 1982 | 3.0 | 2.4 | 3.6 | Denmark |
| Male | 1983 | 3.2 | 2.6 | 3.8 | Denmark |
| Male | 1984 | 3.9 | 3.3 | 4.5 | Denmark |
| Male | 1985 | 3.9 | 3.3 | 4.5 | Denmark |
| Male | 1986 | 3.3 | 2.7 | 3.9 | Denmark |
| Male | 1987 | 4.9 | 4.2 | 5.6 | Denmark |
| Male | 1988 | 4.5 | 3.8 | 5.2 | Denmark |
| Male | 1989 | 4.4 | 3.7 | 5.1 | Denmark |
| Male | 1990 | 5.0 | 4.3 | 5.7 | Denmark |
| Male | 1991 | 4.9 | 4.2 | 5.6 | Denmark |
| Male | 1992 | 5.4 | 4.7 | 6.1 | Denmark |
| Male | 1993 | 5.2 | 4.5 | 5.9 | Denmark |
| Male | 1994 | 5.6 | 4.9 | 6.3 | Denmark |
| Male | 1995 | 5.5 | 4.8 | 6.2 | Denmark |
| Male | 1996 | 6.3 | 5.5 | 7.1 | Denmark |
| Male | 1997 | 6.4 | 5.6 | 7.2 | Denmark |
| Male | 1998 | 6.0 | 5.3 | 6.7 | Denmark |
| Male | 1999 | 5.9 | 5.2 | 6.6 | Denmark |
| Male | 2000 | 5.9 | 5.2 | 6.6 | Denmark |
| Male | 2001 | 6.6 | 5.8 | 7.4 | Denmark |
| Male | 2002 | 6.9 | 6.1 | 7.7 | Denmark |
| Male | 2003 | 6.2 | 5.5 | 6.9 | Denmark |
| Male | 2004 | 6.4 | 5.7 | 7.1 | Denmark |
| Male | 2005 | 5.8 | 5.1 | 6.5 | Denmark |
| Male | 2006 | 5.7 | 5.0 | 6.4 | Denmark |
| Male | 2007 | 5.6 | 4.9 | 6.3 | Denmark |
| Male | 2008 | 6.3 | 5.6 | 7.0 | Denmark |
| Male | 2009 | 6.5 | 5.8 | 7.2 | Denmark |
| Male | 2010 | 6.8 | 6.1 | 7.5 | Denmark |
| Male | 2011 | 7.1 | 6.4 | 7.8 | Denmark |
| Male | 2012 | 7.8 | 7.1 | 8.5 | Denmark |

|        |      |     |     |     |         |
|--------|------|-----|-----|-----|---------|
| Male   | 2013 | 7.2 | 6.5 | 7.9 | Denmark |
| Male   | 2014 | 6.1 | 5.5 | 6.7 | Denmark |
| Male   | 2015 | 7.3 | 6.6 | 8.0 | Denmark |
| Male   | 2016 | 6.6 | 5.9 | 7.3 | Denmark |
| Male   | 2017 | 6.8 | 6.1 | 7.5 | Denmark |
| Male   | 2018 | 7.9 | 7.2 | 8.6 | Denmark |
| Male   | 2019 | 6.9 | 6.3 | 7.5 | Denmark |
| Female | 1953 | 6.2 | 5.2 | 7.2 | Finland |
| Female | 1954 | 6.6 | 5.6 | 7.6 | Finland |
| Female | 1955 | 5.9 | 5.0 | 6.8 | Finland |
| Female | 1956 | 6.8 | 5.8 | 7.8 | Finland |
| Female | 1957 | 5.9 | 5.0 | 6.8 | Finland |
| Female | 1958 | 5.9 | 5.0 | 6.8 | Finland |
| Female | 1959 | 5.9 | 5.0 | 6.8 | Finland |
| Female | 1960 | 5.9 | 5.0 | 6.8 | Finland |
| Female | 1961 | 5.3 | 4.5 | 6.1 | Finland |
| Female | 1962 | 5.3 | 4.5 | 6.1 | Finland |
| Female | 1963 | 4.6 | 3.8 | 5.4 | Finland |
| Female | 1964 | 5.5 | 4.7 | 6.3 | Finland |
| Female | 1965 | 4.2 | 3.5 | 4.9 | Finland |
| Female | 1966 | 4.3 | 3.6 | 5.0 | Finland |
| Female | 1967 | 3.9 | 3.2 | 4.6 | Finland |
| Female | 1968 | 3.7 | 3.1 | 4.3 | Finland |
| Female | 1969 | 4.2 | 3.5 | 4.9 | Finland |
| Female | 1970 | 3.4 | 2.8 | 4.0 | Finland |
| Female | 1971 | 3.6 | 3.0 | 4.2 | Finland |
| Female | 1972 | 3.7 | 3.1 | 4.3 | Finland |
| Female | 1973 | 2.6 | 2.1 | 3.1 | Finland |
| Female | 1974 | 3.5 | 2.9 | 4.1 | Finland |
| Female | 1975 | 2.5 | 2.0 | 3.0 | Finland |
| Female | 1976 | 2.8 | 2.3 | 3.3 | Finland |
| Female | 1977 | 2.9 | 2.4 | 3.4 | Finland |
| Female | 1978 | 2.1 | 1.7 | 2.5 | Finland |
| Female | 1979 | 2.6 | 2.1 | 3.1 | Finland |
| Female | 1980 | 2.5 | 2.1 | 2.9 | Finland |
| Female | 1981 | 2.4 | 2.0 | 2.8 | Finland |
| Female | 1982 | 2.2 | 1.8 | 2.6 | Finland |
| Female | 1983 | 2.3 | 1.9 | 2.7 | Finland |
| Female | 1984 | 2.2 | 1.8 | 2.6 | Finland |
| Female | 1985 | 2.3 | 1.9 | 2.7 | Finland |
| Female | 1986 | 2.0 | 1.6 | 2.4 | Finland |
| Female | 1987 | 1.9 | 1.5 | 2.3 | Finland |
| Female | 1988 | 1.9 | 1.5 | 2.3 | Finland |
| Female | 1989 | 1.8 | 1.5 | 2.1 | Finland |
| Female | 1990 | 1.5 | 1.2 | 1.8 | Finland |
| Female | 1991 | 1.7 | 1.4 | 2.0 | Finland |

|        |      |      |     |      |         |
|--------|------|------|-----|------|---------|
| Female | 1992 | 1.3  | 1.0 | 1.6  | Finland |
| Female | 1993 | 1.2  | 0.9 | 1.5  | Finland |
| Female | 1994 | 1.3  | 1.0 | 1.6  | Finland |
| Female | 1995 | 1.5  | 1.2 | 1.8  | Finland |
| Female | 1996 | 1.5  | 1.2 | 1.8  | Finland |
| Female | 1997 | 1.5  | 1.2 | 1.8  | Finland |
| Female | 1998 | 1.2  | 0.9 | 1.5  | Finland |
| Female | 1999 | 1.1  | 0.9 | 1.3  | Finland |
| Female | 2000 | 1.3  | 1.0 | 1.6  | Finland |
| Female | 2001 | 1.0  | 0.7 | 1.2  | Finland |
| Female | 2002 | 1.3  | 1.0 | 1.6  | Finland |
| Female | 2003 | 1.0  | 0.7 | 1.2  | Finland |
| Female | 2004 | 1.3  | 1.0 | 1.6  | Finland |
| Female | 2005 | 1.1  | 0.9 | 1.3  | Finland |
| Female | 2006 | 1.2  | 0.9 | 1.5  | Finland |
| Female | 2007 | 1.0  | 0.8 | 1.2  | Finland |
| Female | 2008 | 1.1  | 0.9 | 1.3  | Finland |
| Female | 2009 | 1.2  | 1.0 | 1.4  | Finland |
| Female | 2010 | 1.3  | 1.0 | 1.6  | Finland |
| Female | 2011 | 0.9  | 0.7 | 1.1  | Finland |
| Female | 2012 | 1.0  | 0.8 | 1.2  | Finland |
| Female | 2013 | 1.0  | 0.7 | 1.2  | Finland |
| Female | 2014 | 1.4  | 1.1 | 1.7  | Finland |
| Female | 2015 | 0.9  | 0.7 | 1.1  | Finland |
| Female | 2016 | 1.5  | 1.2 | 1.8  | Finland |
| Female | 2017 | 1.2  | 1.0 | 1.4  | Finland |
| Female | 2018 | 1.2  | 1.0 | 1.4  | Finland |
| Female | 2019 | 1.4  | 1.1 | 1.7  | Finland |
| Male   | 1953 | 9.2  | 7.7 | 10.7 | Finland |
| Male   | 1954 | 8.9  | 7.5 | 10.3 | Finland |
| Male   | 1955 | 8.8  | 7.4 | 10.2 | Finland |
| Male   | 1956 | 10.2 | 8.7 | 11.7 | Finland |
| Male   | 1957 | 8.2  | 6.9 | 9.5  | Finland |
| Male   | 1958 | 7.8  | 6.5 | 9.1  | Finland |
| Male   | 1959 | 7.5  | 6.3 | 8.7  | Finland |
| Male   | 1960 | 7.4  | 6.2 | 8.6  | Finland |
| Male   | 1961 | 6.3  | 5.2 | 7.4  | Finland |
| Male   | 1962 | 7.2  | 6.0 | 8.4  | Finland |
| Male   | 1963 | 6.3  | 5.2 | 7.4  | Finland |
| Male   | 1964 | 7.2  | 6.0 | 8.4  | Finland |
| Male   | 1965 | 6.0  | 4.9 | 7.1  | Finland |
| Male   | 1966 | 5.1  | 4.1 | 6.1  | Finland |
| Male   | 1967 | 5.6  | 4.6 | 6.6  | Finland |
| Male   | 1968 | 5.0  | 4.1 | 5.9  | Finland |
| Male   | 1969 | 5.6  | 4.6 | 6.6  | Finland |
| Male   | 1970 | 4.7  | 3.8 | 5.6  | Finland |

|      |      |     |     |     |         |
|------|------|-----|-----|-----|---------|
| Male | 1971 | 4.5 | 3.6 | 5.4 | Finland |
| Male | 1972 | 4.4 | 3.5 | 5.3 | Finland |
| Male | 1973 | 4.3 | 3.5 | 5.1 | Finland |
| Male | 1974 | 4.4 | 3.6 | 5.2 | Finland |
| Male | 1975 | 3.7 | 2.9 | 4.5 | Finland |
| Male | 1976 | 3.4 | 2.7 | 4.1 | Finland |
| Male | 1977 | 3.8 | 3.1 | 4.5 | Finland |
| Male | 1978 | 3.6 | 2.9 | 4.3 | Finland |
| Male | 1979 | 3.9 | 3.2 | 4.6 | Finland |
| Male | 1980 | 3.8 | 3.1 | 4.5 | Finland |
| Male | 1981 | 3.6 | 2.9 | 4.3 | Finland |
| Male | 1982 | 3.3 | 2.6 | 4.0 | Finland |
| Male | 1983 | 3.6 | 2.9 | 4.3 | Finland |
| Male | 1984 | 3.3 | 2.6 | 4.0 | Finland |
| Male | 1985 | 3.3 | 2.7 | 3.9 | Finland |
| Male | 1986 | 3.3 | 2.7 | 3.9 | Finland |
| Male | 1987 | 3.4 | 2.7 | 4.1 | Finland |
| Male | 1988 | 3.2 | 2.6 | 3.8 | Finland |
| Male | 1989 | 3.3 | 2.7 | 3.9 | Finland |
| Male | 1990 | 3.9 | 3.2 | 4.6 | Finland |
| Male | 1991 | 3.5 | 2.9 | 4.1 | Finland |
| Male | 1992 | 3.6 | 3.0 | 4.2 | Finland |
| Male | 1993 | 2.8 | 2.2 | 3.4 | Finland |
| Male | 1994 | 3.8 | 3.2 | 4.4 | Finland |
| Male | 1995 | 3.4 | 2.8 | 4.0 | Finland |
| Male | 1996 | 3.3 | 2.7 | 3.9 | Finland |
| Male | 1997 | 3.1 | 2.5 | 3.7 | Finland |
| Male | 1998 | 3.4 | 2.8 | 4.0 | Finland |
| Male | 1999 | 3.3 | 2.7 | 3.9 | Finland |
| Male | 2000 | 3.1 | 2.5 | 3.7 | Finland |
| Male | 2001 | 3.9 | 3.3 | 4.5 | Finland |
| Male | 2002 | 3.9 | 3.3 | 4.5 | Finland |
| Male | 2003 | 3.5 | 2.9 | 4.1 | Finland |
| Male | 2004 | 3.4 | 2.8 | 4.0 | Finland |
| Male | 2005 | 3.6 | 3.0 | 4.2 | Finland |
| Male | 2006 | 3.7 | 3.1 | 4.3 | Finland |
| Male | 2007 | 3.5 | 3.0 | 4.0 | Finland |
| Male | 2008 | 3.4 | 2.9 | 3.9 | Finland |
| Male | 2009 | 4.0 | 3.4 | 4.6 | Finland |
| Male | 2010 | 4.2 | 3.6 | 4.8 | Finland |
| Male | 2011 | 4.0 | 3.5 | 4.5 | Finland |
| Male | 2012 | 3.9 | 3.4 | 4.4 | Finland |
| Male | 2013 | 3.8 | 3.3 | 4.3 | Finland |
| Male | 2014 | 4.1 | 3.6 | 4.6 | Finland |
| Male | 2015 | 3.9 | 3.4 | 4.4 | Finland |
| Male | 2016 | 4.2 | 3.7 | 4.7 | Finland |

|        |      |     |       |      |         |
|--------|------|-----|-------|------|---------|
| Male   | 2017 | 4.9 | 4.3   | 5.5  | Finland |
| Male   | 2018 | 4.0 | 3.5   | 4.5  | Finland |
| Male   | 2019 | 4.5 | 4.0   | 5.0  | Finland |
| Female | 1955 | 4.8 | 0.6   | 9.0  | Iceland |
| Female | 1956 | 4.5 | 0.6   | 8.4  | Iceland |
| Female | 1957 | 3.8 | 0.1   | 7.5  | Iceland |
| Female | 1958 | 1.8 | (0.7) | 4.3  | Iceland |
| Female | 1959 | 8.6 | 3.0   | 14.2 | Iceland |
| Female | 1960 | 4.9 | 0.6   | 9.2  | Iceland |
| Female | 1961 | 4.2 | 0.8   | 7.6  | Iceland |
| Female | 1962 | 6.2 | 1.6   | 10.8 | Iceland |
| Female | 1963 | 7.8 | 3.0   | 12.6 | Iceland |
| Female | 1964 | 7.6 | 2.6   | 12.6 | Iceland |
| Female | 1965 | 5.7 | 1.8   | 9.6  | Iceland |
| Female | 1966 | 2.8 | 0.1   | 5.5  | Iceland |
| Female | 1967 | 2.3 | 0.0   | 4.6  | Iceland |
| Female | 1968 | 4.3 | 0.9   | 7.7  | Iceland |
| Female | 1969 | 1.5 | (0.6) | 3.6  | Iceland |
| Female | 1970 | 1.6 | (0.6) | 3.8  | Iceland |
| Female | 1971 | 2.3 | 0.0   | 4.6  | Iceland |
| Female | 1972 | 1.5 | (0.2) | 3.2  | Iceland |
| Female | 1973 | 3.3 | 0.4   | 6.2  | Iceland |
| Female | 1974 | 2.0 | (0.3) | 4.3  | Iceland |
| Female | 1975 | 3.3 | 0.1   | 6.5  | Iceland |
| Female | 1976 | 3.7 | 0.7   | 6.7  | Iceland |
| Female | 1977 | 1.7 | 0.0   | 3.4  | Iceland |
| Female | 1978 | 1.6 | (0.6) | 3.8  | Iceland |
| Female | 1979 | 3.5 | 0.4   | 6.6  | Iceland |
| Female | 1980 | 0.7 | (0.3) | 1.6  | Iceland |
| Female | 1981 | 2.2 | 0.0   | 4.4  | Iceland |
| Female | 1982 | 2.5 | 0.3   | 4.7  | Iceland |
| Female | 1983 | 5.7 | 2.3   | 9.1  | Iceland |
| Female | 1985 | 2.7 | 0.3   | 5.1  | Iceland |
| Female | 1986 | 1.7 | 0.0   | 3.4  | Iceland |
| Female | 1987 | 2.4 | 0.3   | 4.5  | Iceland |
| Female | 1988 | 1.2 | (0.2) | 2.6  | Iceland |
| Female | 1989 | 1.5 | 0.0   | 3.0  | Iceland |
| Female | 1990 | 1.8 | 0.0   | 3.6  | Iceland |
| Female | 1991 | 0.2 | (0.2) | 0.7  | Iceland |
| Female | 1992 | 5.0 | 1.5   | 8.5  | Iceland |
| Female | 1993 | 1.6 | 0.2   | 3.0  | Iceland |
| Female | 1994 | 2.8 | 0.3   | 5.3  | Iceland |
| Female | 1995 | 2.5 | 0.5   | 4.5  | Iceland |
| Female | 1996 | 0.2 | (0.2) | 0.6  | Iceland |
| Female | 1997 | 3.3 | 1.1   | 5.5  | Iceland |
| Female | 1998 | 0.7 | (0.3) | 1.6  | Iceland |

|        |      |      |       |      |         |
|--------|------|------|-------|------|---------|
| Female | 1999 | 0.9  | (0.1) | 1.9  | Iceland |
| Female | 2000 | 1.1  | (0.1) | 2.3  | Iceland |
| Female | 2001 | 1.3  | (0.2) | 2.8  | Iceland |
| Female | 2002 | 1.9  | 0.0   | 3.8  | Iceland |
| Female | 2003 | 0.4  | (0.2) | 1.0  | Iceland |
| Female | 2004 | 1.9  | 0.4   | 3.4  | Iceland |
| Female | 2005 | 2.3  | 0.6   | 4.0  | Iceland |
| Female | 2006 | 2.4  | 0.5   | 4.3  | Iceland |
| Female | 2007 | 1.8  | (0.2) | 3.8  | Iceland |
| Female | 2008 | 0.6  | (0.5) | 1.7  | Iceland |
| Female | 2009 | 1.7  | 0.3   | 3.1  | Iceland |
| Female | 2010 | 1.2  | 0.0   | 2.4  | Iceland |
| Female | 2011 | 2.1  | 0.6   | 3.6  | Iceland |
| Female | 2012 | 0.6  | (0.1) | 1.2  | Iceland |
| Female | 2013 | 1.5  | 0.4   | 2.6  | Iceland |
| Female | 2014 | 1.7  | 0.2   | 3.2  | Iceland |
| Female | 2015 | 2.7  | 0.9   | 4.5  | Iceland |
| Female | 2016 | 0.9  | (0.1) | 1.9  | Iceland |
| Female | 2017 | 1.0  | (0.1) | 2.1  | Iceland |
| Female | 2018 | 1.5  | 0.3   | 2.7  | Iceland |
| Female | 2019 | 0.7  | (0.3) | 1.7  | Iceland |
| Male   | 1955 | 6.3  | 0.8   | 11.8 | Iceland |
| Male   | 1956 | 8.2  | 2.1   | 14.3 | Iceland |
| Male   | 1957 | 8.2  | 2.1   | 14.3 | Iceland |
| Male   | 1958 | 4.6  | 0.1   | 9.1  | Iceland |
| Male   | 1959 | 8.6  | 2.6   | 14.6 | Iceland |
| Male   | 1960 | 9.2  | 2.4   | 16.0 | Iceland |
| Male   | 1961 | 10.0 | 3.1   | 16.9 | Iceland |
| Male   | 1962 | 4.8  | 0.6   | 9.0  | Iceland |
| Male   | 1963 | 8.8  | 2.7   | 14.9 | Iceland |
| Male   | 1964 | 3.9  | 0.1   | 7.7  | Iceland |
| Male   | 1965 | 6.0  | 1.2   | 10.8 | Iceland |
| Male   | 1966 | 8.9  | 3.4   | 14.4 | Iceland |
| Male   | 1967 | 4.1  | 0.5   | 7.7  | Iceland |
| Male   | 1968 | 4.1  | 0.1   | 8.1  | Iceland |
| Male   | 1969 | 6.4  | 1.7   | 11.1 | Iceland |
| Male   | 1970 | 5.4  | 1.1   | 9.7  | Iceland |
| Male   | 1971 | 2.6  | (0.3) | 5.5  | Iceland |
| Male   | 1972 | 3.8  | 0.5   | 7.1  | Iceland |
| Male   | 1973 | 2.1  | (0.3) | 4.5  | Iceland |
| Male   | 1974 | 4.2  | 0.1   | 8.3  | Iceland |
| Male   | 1975 | 5.4  | 1.1   | 9.7  | Iceland |
| Male   | 1976 | 3.4  | 0.1   | 6.7  | Iceland |
| Male   | 1977 | 4.5  | 0.9   | 8.1  | Iceland |
| Male   | 1978 | 4.8  | 1.0   | 8.6  | Iceland |
| Male   | 1979 | 5.4  | 1.7   | 9.1  | Iceland |

|        |      |     |       |      |         |
|--------|------|-----|-------|------|---------|
| Male   | 1980 | 2.5 | (0.3) | 5.3  | Iceland |
| Male   | 1981 | 3.6 | 0.4   | 6.8  | Iceland |
| Male   | 1982 | 5.9 | 1.8   | 10.0 | Iceland |
| Male   | 1983 | 6.6 | 2.0   | 11.2 | Iceland |
| Male   | 1984 | 4.4 | 1.1   | 7.7  | Iceland |
| Male   | 1985 | 6.1 | 1.9   | 10.3 | Iceland |
| Male   | 1986 | 0.9 | (0.3) | 2.1  | Iceland |
| Male   | 1987 | 2.6 | 0.1   | 5.1  | Iceland |
| Male   | 1988 | 5.0 | 1.3   | 8.7  | Iceland |
| Male   | 1989 | 8.8 | 4.2   | 13.4 | Iceland |
| Male   | 1990 | 6.2 | 2.4   | 10.0 | Iceland |
| Male   | 1991 | 7.6 | 3.5   | 11.7 | Iceland |
| Male   | 1992 | 3.8 | 0.8   | 6.8  | Iceland |
| Male   | 1993 | 2.4 | 0.3   | 4.5  | Iceland |
| Male   | 1994 | 6.2 | 2.7   | 9.7  | Iceland |
| Male   | 1995 | 4.6 | 1.6   | 7.6  | Iceland |
| Male   | 1996 | 8.8 | 4.6   | 13.0 | Iceland |
| Male   | 1997 | 4.9 | 1.9   | 7.9  | Iceland |
| Male   | 1998 | 5.3 | 2.0   | 8.6  | Iceland |
| Male   | 1999 | 4.0 | 1.2   | 6.8  | Iceland |
| Male   | 2000 | 5.3 | 2.0   | 8.6  | Iceland |
| Male   | 2001 | 5.4 | 2.1   | 8.7  | Iceland |
| Male   | 2002 | 5.9 | 2.4   | 9.4  | Iceland |
| Male   | 2003 | 3.3 | 0.9   | 5.7  | Iceland |
| Male   | 2004 | 7.5 | 3.6   | 11.4 | Iceland |
| Male   | 2005 | 3.8 | 1.2   | 6.4  | Iceland |
| Male   | 2006 | 5.3 | 2.3   | 8.3  | Iceland |
| Male   | 2007 | 6.6 | 3.3   | 9.9  | Iceland |
| Male   | 2008 | 7.5 | 4.1   | 10.9 | Iceland |
| Male   | 2009 | 8.5 | 4.6   | 12.4 | Iceland |
| Male   | 2010 | 5.4 | 2.5   | 8.3  | Iceland |
| Male   | 2011 | 7.0 | 3.8   | 10.2 | Iceland |
| Male   | 2012 | 8.6 | 4.8   | 12.4 | Iceland |
| Male   | 2013 | 7.4 | 4.2   | 10.6 | Iceland |
| Male   | 2014 | 4.2 | 1.6   | 6.8  | Iceland |
| Male   | 2015 | 4.5 | 2.0   | 7.0  | Iceland |
| Male   | 2016 | 5.0 | 2.5   | 7.5  | Iceland |
| Male   | 2017 | 7.0 | 3.9   | 10.1 | Iceland |
| Male   | 2018 | 6.9 | 4.0   | 9.8  | Iceland |
| Male   | 2019 | 5.4 | 2.9   | 7.9  | Iceland |
| Female | 1953 | 1.1 | 0.7   | 1.5  | Norway  |
| Female | 1954 | 1.0 | 0.6   | 1.4  | Norway  |
| Female | 1955 | 1.0 | 0.6   | 1.4  | Norway  |
| Female | 1956 | 0.7 | 0.4   | 1.0  | Norway  |
| Female | 1957 | 0.6 | 0.3   | 0.9  | Norway  |
| Female | 1958 | 0.9 | 0.6   | 1.3  | Norway  |



|        |      |     |     |     |        |
|--------|------|-----|-----|-----|--------|
| Female | 1959 | 0.8 | 0.5 | 1.2 | Norway |
| Female | 1960 | 0.9 | 0.5 | 1.2 | Norway |
| Female | 1961 | 0.6 | 0.4 | 0.9 | Norway |
| Female | 1962 | 0.9 | 0.5 | 1.2 | Norway |
| Female | 1963 | 0.9 | 0.5 | 1.2 | Norway |
| Female | 1964 | 1.1 | 0.7 | 1.5 | Norway |
| Female | 1965 | 0.8 | 0.5 | 1.1 | Norway |
| Female | 1966 | 1.0 | 0.6 | 1.3 | Norway |
| Female | 1967 | 0.9 | 0.6 | 1.2 | Norway |
| Female | 1968 | 0.6 | 0.3 | 0.8 | Norway |
| Female | 1969 | 0.9 | 0.6 | 1.2 | Norway |
| Female | 1970 | 0.7 | 0.5 | 1.0 | Norway |
| Female | 1971 | 0.7 | 0.5 | 1.0 | Norway |
| Female | 1972 | 0.7 | 0.4 | 0.9 | Norway |
| Female | 1973 | 0.7 | 0.5 | 1.0 | Norway |
| Female | 1974 | 0.8 | 0.5 | 1.0 | Norway |
| Female | 1975 | 0.7 | 0.4 | 0.9 | Norway |
| Female | 1976 | 0.7 | 0.4 | 0.9 | Norway |
| Female | 1977 | 0.7 | 0.5 | 1.0 | Norway |
| Female | 1978 | 1.0 | 0.7 | 1.2 | Norway |
| Female | 1979 | 0.5 | 0.3 | 0.8 | Norway |
| Female | 1980 | 0.6 | 0.4 | 0.8 | Norway |
| Female | 1981 | 0.6 | 0.4 | 0.8 | Norway |
| Female | 1982 | 0.8 | 0.6 | 1.0 | Norway |
| Female | 1983 | 0.7 | 0.5 | 1.0 | Norway |
| Female | 1984 | 0.8 | 0.5 | 1.0 | Norway |
| Female | 1985 | 0.8 | 0.5 | 1.1 | Norway |
| Female | 1986 | 0.6 | 0.4 | 0.8 | Norway |
| Female | 1987 | 1.0 | 0.7 | 1.3 | Norway |
| Female | 1988 | 0.8 | 0.6 | 1.1 | Norway |
| Female | 1989 | 0.7 | 0.5 | 1.0 | Norway |
| Female | 1990 | 1.0 | 0.7 | 1.3 | Norway |
| Female | 1991 | 0.9 | 0.6 | 1.2 | Norway |
| Female | 1992 | 0.6 | 0.4 | 0.8 | Norway |
| Female | 1993 | 0.8 | 0.5 | 1.0 | Norway |
| Female | 1994 | 1.0 | 0.7 | 1.3 | Norway |
| Female | 1995 | 0.8 | 0.6 | 1.1 | Norway |
| Female | 1996 | 0.7 | 0.5 | 0.9 | Norway |
| Female | 1997 | 0.9 | 0.7 | 1.2 | Norway |
| Female | 1998 | 1.2 | 0.9 | 1.5 | Norway |
| Female | 1999 | 0.9 | 0.6 | 1.2 | Norway |
| Female | 2000 | 1.0 | 0.7 | 1.3 | Norway |
| Female | 2001 | 1.1 | 0.8 | 1.4 | Norway |
| Female | 2002 | 0.9 | 0.7 | 1.2 | Norway |
| Female | 2003 | 1.1 | 0.8 | 1.4 | Norway |
| Female | 2004 | 1.1 | 0.8 | 1.4 | Norway |

|        |      |     |     |     |        |
|--------|------|-----|-----|-----|--------|
| Female | 2005 | 1.1 | 0.8 | 1.4 | Norway |
| Female | 2006 | 0.9 | 0.6 | 1.2 | Norway |
| Female | 2007 | 1.0 | 0.7 | 1.2 | Norway |
| Female | 2008 | 1.1 | 0.8 | 1.4 | Norway |
| Female | 2009 | 1.0 | 0.7 | 1.3 | Norway |
| Female | 2010 | 1.1 | 0.8 | 1.4 | Norway |
| Female | 2011 | 1.1 | 0.8 | 1.4 | Norway |
| Female | 2012 | 1.3 | 1.0 | 1.6 | Norway |
| Female | 2013 | 1.1 | 0.8 | 1.4 | Norway |
| Female | 2014 | 1.3 | 1.0 | 1.6 | Norway |
| Female | 2015 | 1.3 | 1.0 | 1.6 | Norway |
| Female | 2016 | 1.2 | 0.9 | 1.5 | Norway |
| Female | 2017 | 1.3 | 1.0 | 1.6 | Norway |
| Female | 2018 | 1.4 | 1.1 | 1.7 | Norway |
| Female | 2019 | 1.3 | 1.0 | 1.6 | Norway |
| Male   | 1953 | 3.3 | 2.5 | 4.1 | Norway |
| Male   | 1954 | 3.5 | 2.7 | 4.3 | Norway |
| Male   | 1955 | 3.5 | 2.7 | 4.3 | Norway |
| Male   | 1956 | 3.0 | 2.3 | 3.7 | Norway |
| Male   | 1957 | 3.2 | 2.5 | 3.9 | Norway |
| Male   | 1958 | 2.7 | 2.0 | 3.4 | Norway |
| Male   | 1959 | 3.2 | 2.5 | 3.9 | Norway |
| Male   | 1960 | 3.4 | 2.7 | 4.1 | Norway |
| Male   | 1961 | 3.5 | 2.8 | 4.2 | Norway |
| Male   | 1962 | 3.6 | 2.9 | 4.3 | Norway |
| Male   | 1963 | 2.7 | 2.1 | 3.3 | Norway |
| Male   | 1964 | 2.5 | 1.9 | 3.1 | Norway |
| Male   | 1965 | 3.1 | 2.4 | 3.8 | Norway |
| Male   | 1966 | 2.8 | 2.2 | 3.4 | Norway |
| Male   | 1967 | 2.6 | 2.0 | 3.2 | Norway |
| Male   | 1968 | 2.6 | 2.0 | 3.2 | Norway |
| Male   | 1969 | 2.6 | 2.0 | 3.2 | Norway |
| Male   | 1970 | 2.6 | 2.0 | 3.2 | Norway |
| Male   | 1971 | 3.0 | 2.4 | 3.6 | Norway |
| Male   | 1972 | 2.9 | 2.3 | 3.5 | Norway |
| Male   | 1973 | 2.0 | 1.5 | 2.5 | Norway |
| Male   | 1974 | 2.5 | 1.9 | 3.1 | Norway |
| Male   | 1975 | 3.2 | 2.6 | 3.8 | Norway |
| Male   | 1976 | 2.9 | 2.3 | 3.5 | Norway |
| Male   | 1977 | 2.6 | 2.0 | 3.2 | Norway |
| Male   | 1978 | 3.1 | 2.5 | 3.7 | Norway |
| Male   | 1979 | 2.6 | 2.0 | 3.2 | Norway |
| Male   | 1980 | 2.2 | 1.7 | 2.7 | Norway |
| Male   | 1981 | 2.9 | 2.3 | 3.5 | Norway |
| Male   | 1982 | 2.6 | 2.1 | 3.1 | Norway |
| Male   | 1983 | 2.9 | 2.3 | 3.5 | Norway |

|        |      |     |     |     |        |
|--------|------|-----|-----|-----|--------|
| Male   | 1984 | 2.2 | 1.7 | 2.7 | Norway |
| Male   | 1985 | 2.8 | 2.2 | 3.4 | Norway |
| Male   | 1986 | 2.5 | 2.0 | 3.0 | Norway |
| Male   | 1987 | 2.9 | 2.3 | 3.5 | Norway |
| Male   | 1988 | 3.4 | 2.8 | 4.0 | Norway |
| Male   | 1989 | 2.8 | 2.2 | 3.4 | Norway |
| Male   | 1990 | 3.2 | 2.6 | 3.8 | Norway |
| Male   | 1991 | 3.5 | 2.8 | 4.2 | Norway |
| Male   | 1992 | 3.1 | 2.5 | 3.7 | Norway |
| Male   | 1993 | 3.8 | 3.1 | 4.5 | Norway |
| Male   | 1994 | 2.3 | 1.8 | 2.8 | Norway |
| Male   | 1995 | 3.5 | 2.9 | 4.1 | Norway |
| Male   | 1996 | 3.2 | 2.6 | 3.8 | Norway |
| Male   | 1997 | 3.6 | 3.0 | 4.2 | Norway |
| Male   | 1998 | 3.5 | 2.9 | 4.1 | Norway |
| Male   | 1999 | 3.7 | 3.1 | 4.3 | Norway |
| Male   | 2000 | 2.8 | 2.3 | 3.3 | Norway |
| Male   | 2001 | 3.2 | 2.6 | 3.8 | Norway |
| Male   | 2002 | 3.5 | 2.9 | 4.1 | Norway |
| Male   | 2003 | 3.7 | 3.1 | 4.3 | Norway |
| Male   | 2004 | 4.0 | 3.4 | 4.6 | Norway |
| Male   | 2005 | 3.5 | 2.9 | 4.1 | Norway |
| Male   | 2006 | 3.9 | 3.3 | 4.5 | Norway |
| Male   | 2007 | 3.3 | 2.7 | 3.9 | Norway |
| Male   | 2008 | 4.0 | 3.4 | 4.6 | Norway |
| Male   | 2009 | 3.7 | 3.1 | 4.3 | Norway |
| Male   | 2010 | 4.4 | 3.8 | 5.0 | Norway |
| Male   | 2011 | 4.2 | 3.6 | 4.8 | Norway |
| Male   | 2012 | 4.0 | 3.4 | 4.6 | Norway |
| Male   | 2013 | 4.2 | 3.6 | 4.8 | Norway |
| Male   | 2014 | 4.8 | 4.2 | 5.4 | Norway |
| Male   | 2015 | 4.7 | 4.1 | 5.3 | Norway |
| Male   | 2016 | 4.4 | 3.8 | 5.0 | Norway |
| Male   | 2017 | 4.2 | 3.6 | 4.8 | Norway |
| Male   | 2018 | 4.7 | 4.1 | 5.3 | Norway |
| Male   | 2019 | 4.3 | 3.7 | 4.9 | Norway |
| Female | 1960 | 1.0 | 0.8 | 1.2 | Sweden |
| Female | 1961 | 1.2 | 0.9 | 1.5 | Sweden |
| Female | 1962 | 1.0 | 0.8 | 1.2 | Sweden |
| Female | 1963 | 1.1 | 0.9 | 1.3 | Sweden |
| Female | 1964 | 1.2 | 1.0 | 1.4 | Sweden |
| Female | 1965 | 1.2 | 0.9 | 1.5 | Sweden |
| Female | 1966 | 1.2 | 1.0 | 1.4 | Sweden |
| Female | 1967 | 1.1 | 0.9 | 1.3 | Sweden |
| Female | 1968 | 1.1 | 0.9 | 1.3 | Sweden |
| Female | 1969 | 0.9 | 0.7 | 1.1 | Sweden |

|        |      |     |     |     |        |
|--------|------|-----|-----|-----|--------|
| Female | 1970 | 0.9 | 0.6 | 1.1 | Sweden |
| Female | 1971 | 1.2 | 1.0 | 1.4 | Sweden |
| Female | 1972 | 1.3 | 1.1 | 1.5 | Sweden |
| Female | 1973 | 1.0 | 0.8 | 1.2 | Sweden |
| Female | 1974 | 1.0 | 0.8 | 1.2 | Sweden |
| Female | 1975 | 0.9 | 0.7 | 1.1 | Sweden |
| Female | 1976 | 0.8 | 0.6 | 1.0 | Sweden |
| Female | 1977 | 1.0 | 0.8 | 1.2 | Sweden |
| Female | 1978 | 0.8 | 0.7 | 1.0 | Sweden |
| Female | 1979 | 0.9 | 0.7 | 1.1 | Sweden |
| Female | 1980 | 0.9 | 0.7 | 1.1 | Sweden |
| Female | 1981 | 0.7 | 0.6 | 0.9 | Sweden |
| Female | 1982 | 0.8 | 0.7 | 1.0 | Sweden |
| Female | 1983 | 0.9 | 0.7 | 1.1 | Sweden |
| Female | 1984 | 1.0 | 0.8 | 1.1 | Sweden |
| Female | 1985 | 0.8 | 0.7 | 1.0 | Sweden |
| Female | 1986 | 0.9 | 0.7 | 1.0 | Sweden |
| Female | 1987 | 0.9 | 0.7 | 1.1 | Sweden |
| Female | 1988 | 1.1 | 0.9 | 1.3 | Sweden |
| Female | 1989 | 1.0 | 0.8 | 1.1 | Sweden |
| Female | 1990 | 0.9 | 0.7 | 1.1 | Sweden |
| Female | 1991 | 1.0 | 0.8 | 1.2 | Sweden |
| Female | 1992 | 1.1 | 0.9 | 1.3 | Sweden |
| Female | 1993 | 1.2 | 1.0 | 1.4 | Sweden |
| Female | 1994 | 1.0 | 0.8 | 1.2 | Sweden |
| Female | 1995 | 0.9 | 0.7 | 1.1 | Sweden |
| Female | 1996 | 0.8 | 0.7 | 1.0 | Sweden |
| Female | 1997 | 0.8 | 0.6 | 1.0 | Sweden |
| Female | 1998 | 1.0 | 0.8 | 1.2 | Sweden |
| Female | 1999 | 1.1 | 0.9 | 1.3 | Sweden |
| Female | 2000 | 1.1 | 0.9 | 1.3 | Sweden |
| Female | 2001 | 1.2 | 1.0 | 1.4 | Sweden |
| Female | 2002 | 1.0 | 0.8 | 1.2 | Sweden |
| Female | 2003 | 0.9 | 0.7 | 1.1 | Sweden |
| Female | 2004 | 0.8 | 0.7 | 1.0 | Sweden |
| Female | 2005 | 0.9 | 0.7 | 1.1 | Sweden |
| Female | 2006 | 0.9 | 0.7 | 1.1 | Sweden |
| Female | 2007 | 1.2 | 1.0 | 1.4 | Sweden |
| Female | 2008 | 1.0 | 0.8 | 1.2 | Sweden |
| Female | 2009 | 1.1 | 0.9 | 1.3 | Sweden |
| Female | 2010 | 0.9 | 0.7 | 1.1 | Sweden |
| Female | 2011 | 1.0 | 0.8 | 1.2 | Sweden |
| Female | 2012 | 1.0 | 0.8 | 1.2 | Sweden |
| Female | 2013 | 1.0 | 0.8 | 1.1 | Sweden |
| Female | 2014 | 1.2 | 1.0 | 1.4 | Sweden |
| Female | 2015 | 1.1 | 0.9 | 1.3 | Sweden |

|        |      |     |     |     |        |
|--------|------|-----|-----|-----|--------|
| Female | 2016 | 1.1 | 0.9 | 1.3 | Sweden |
| Female | 2017 | 1.2 | 1.0 | 1.4 | Sweden |
| Female | 2018 | 1.1 | 0.9 | 1.3 | Sweden |
| Female | 2019 | 1.0 | 0.8 | 1.2 | Sweden |
| Male   | 1960 | 2.4 | 2.0 | 2.8 | Sweden |
| Male   | 1961 | 2.6 | 2.2 | 3.0 | Sweden |
| Male   | 1962 | 2.7 | 2.3 | 3.1 | Sweden |
| Male   | 1963 | 2.3 | 1.9 | 2.7 | Sweden |
| Male   | 1964 | 2.5 | 2.1 | 2.9 | Sweden |
| Male   | 1965 | 2.7 | 2.3 | 3.1 | Sweden |
| Male   | 1966 | 2.7 | 2.3 | 3.1 | Sweden |
| Male   | 1967 | 2.5 | 2.1 | 2.9 | Sweden |
| Male   | 1968 | 2.8 | 2.4 | 3.2 | Sweden |
| Male   | 1969 | 2.7 | 2.3 | 3.1 | Sweden |
| Male   | 1970 | 2.8 | 2.4 | 3.2 | Sweden |
| Male   | 1971 | 3.0 | 2.6 | 3.4 | Sweden |
| Male   | 1972 | 3.0 | 2.6 | 3.4 | Sweden |
| Male   | 1973 | 2.8 | 2.4 | 3.2 | Sweden |
| Male   | 1974 | 2.8 | 2.4 | 3.2 | Sweden |
| Male   | 1975 | 2.8 | 2.4 | 3.2 | Sweden |
| Male   | 1976 | 3.0 | 2.6 | 3.4 | Sweden |
| Male   | 1977 | 2.9 | 2.5 | 3.3 | Sweden |
| Male   | 1978 | 2.9 | 2.5 | 3.3 | Sweden |
| Male   | 1979 | 2.9 | 2.5 | 3.3 | Sweden |
| Male   | 1980 | 3.2 | 2.8 | 3.6 | Sweden |
| Male   | 1981 | 3.0 | 2.6 | 3.4 | Sweden |
| Male   | 1982 | 3.2 | 2.8 | 3.6 | Sweden |
| Male   | 1983 | 3.2 | 2.8 | 3.6 | Sweden |
| Male   | 1984 | 3.2 | 2.8 | 3.6 | Sweden |
| Male   | 1985 | 3.2 | 2.8 | 3.6 | Sweden |
| Male   | 1986 | 3.3 | 2.9 | 3.7 | Sweden |
| Male   | 1987 | 3.2 | 2.8 | 3.6 | Sweden |
| Male   | 1988 | 3.0 | 2.6 | 3.4 | Sweden |
| Male   | 1989 | 3.1 | 2.7 | 3.5 | Sweden |
| Male   | 1990 | 2.9 | 2.5 | 3.3 | Sweden |
| Male   | 1991 | 3.2 | 2.8 | 3.6 | Sweden |
| Male   | 1992 | 3.0 | 2.6 | 3.4 | Sweden |
| Male   | 1993 | 3.1 | 2.7 | 3.5 | Sweden |
| Male   | 1994 | 2.9 | 2.5 | 3.3 | Sweden |
| Male   | 1995 | 3.0 | 2.6 | 3.4 | Sweden |
| Male   | 1996 | 3.3 | 2.9 | 3.7 | Sweden |
| Male   | 1997 | 3.0 | 2.6 | 3.4 | Sweden |
| Male   | 1998 | 3.4 | 3.0 | 3.8 | Sweden |
| Male   | 1999 | 3.6 | 3.2 | 4.0 | Sweden |
| Male   | 2000 | 3.2 | 2.8 | 3.6 | Sweden |
| Male   | 2001 | 3.5 | 3.1 | 3.9 | Sweden |

|      |      |     |     |     |        |
|------|------|-----|-----|-----|--------|
| Male | 2002 | 3.2 | 2.8 | 3.6 | Sweden |
| Male | 2003 | 3.7 | 3.3 | 4.1 | Sweden |
| Male | 2004 | 3.5 | 3.1 | 3.9 | Sweden |
| Male | 2005 | 3.9 | 3.5 | 4.3 | Sweden |
| Male | 2006 | 3.4 | 3.0 | 3.8 | Sweden |
| Male | 2007 | 2.9 | 2.5 | 3.3 | Sweden |
| Male | 2008 | 3.3 | 2.9 | 3.7 | Sweden |
| Male | 2009 | 3.7 | 3.3 | 4.1 | Sweden |
| Male | 2010 | 3.2 | 2.8 | 3.6 | Sweden |
| Male | 2011 | 3.6 | 3.2 | 4.0 | Sweden |
| Male | 2012 | 3.2 | 2.8 | 3.6 | Sweden |
| Male | 2013 | 3.5 | 3.1 | 3.9 | Sweden |
| Male | 2014 | 3.7 | 3.3 | 4.1 | Sweden |
| Male | 2015 | 3.2 | 2.9 | 3.5 | Sweden |
| Male | 2016 | 3.3 | 3.0 | 3.6 | Sweden |
| Male | 2017 | 3.2 | 2.9 | 3.5 | Sweden |
| Male | 2018 | 3.5 | 3.2 | 3.8 | Sweden |
| Male | 2019 | 3.0 | 2.7 | 3.3 | Sweden |
| Male | 1975 | 4.6 | 4.2 | 5.1 | USA    |
| Male | 1976 | 4.7 | 4.3 | 5.1 | USA    |
| Male | 1977 | 4.5 | 4.1 | 4.9 | USA    |
| Male | 1978 | 4.9 | 4.5 | 5.4 | USA    |
| Male | 1979 | 4.9 | 4.5 | 5.3 | USA    |
| Male | 1980 | 4.8 | 4.4 | 5.2 | USA    |
| Male | 1981 | 4.4 | 4.0 | 4.8 | USA    |
| Male | 1982 | 4.8 | 4.4 | 5.2 | USA    |
| Male | 1983 | 5.0 | 4.6 | 5.4 | USA    |
| Male | 1984 | 4.6 | 4.2 | 5.0 | USA    |
| Male | 1985 | 5.0 | 4.7 | 5.5 | USA    |
| Male | 1986 | 5.1 | 4.7 | 5.5 | USA    |
| Male | 1987 | 5.1 | 4.7 | 5.5 | USA    |
| Male | 1988 | 5.0 | 4.6 | 5.4 | USA    |
| Male | 1989 | 4.8 | 4.5 | 5.2 | USA    |
| Male | 1990 | 5.6 | 5.2 | 6.0 | USA    |
| Male | 1991 | 4.9 | 4.6 | 5.3 | USA    |
| Male | 1992 | 5.4 | 5.0 | 5.8 | USA    |
| Male | 1993 | 5.2 | 4.8 | 5.6 | USA    |
| Male | 1994 | 5.1 | 4.7 | 5.4 | USA    |
| Male | 1995 | 4.8 | 4.4 | 5.1 | USA    |
| Male | 1996 | 5.4 | 5.0 | 5.8 | USA    |
| Male | 1997 | 5.3 | 5.0 | 5.7 | USA    |
| Male | 1998 | 5.3 | 4.9 | 5.7 | USA    |
| Male | 1999 | 5.6 | 5.3 | 6.0 | USA    |
| Male | 2000 | 5.3 | 5.0 | 5.7 | USA    |
| Male | 2001 | 5.5 | 5.2 | 5.9 | USA    |
| Male | 2002 | 5.2 | 4.9 | 5.6 | USA    |

|      |      |     |     |     |           |
|------|------|-----|-----|-----|-----------|
| Male | 2003 | 5.2 | 4.8 | 5.5 | USA       |
| Male | 2004 | 5.8 | 5.4 | 6.1 | USA       |
| Male | 2005 | 5.2 | 4.8 | 5.5 | USA       |
| Male | 2006 | 5.2 | 4.9 | 5.6 | USA       |
| Male | 2007 | 5.1 | 4.8 | 5.5 | USA       |
| Male | 2008 | 5.2 | 4.9 | 5.5 | USA       |
| Male | 2009 | 5.1 | 4.8 | 5.4 | USA       |
| Male | 2010 | 5.0 | 4.7 | 5.4 | USA       |
| Male | 2011 | 4.9 | 4.6 | 5.2 | USA       |
| Male | 2012 | 4.9 | 4.6 | 5.2 | USA       |
| Male | 2013 | 4.9 | 4.6 | 5.2 | USA       |
| Male | 2014 | 4.6 | 4.3 | 4.9 | USA       |
| Male | 2015 | 4.9 | 4.6 | 5.2 | USA       |
| Male | 2016 | 4.9 | 4.6 | 5.2 | USA       |
| Male | 2017 | 4.9 | 4.6 | 5.2 | USA       |
| Male | 2018 | 4.5 | 4.3 | 4.8 | USA       |
| Male | 1975 | 3.8 | 3.4 | 4.2 | USA White |
| Male | 1976 | 3.9 | 3.6 | 4.4 | USA White |
| Male | 1977 | 3.5 | 3.2 | 3.9 | USA White |
| Male | 1978 | 3.9 | 3.6 | 4.3 | USA White |
| Male | 1979 | 3.9 | 3.6 | 4.3 | USA White |
| Male | 1980 | 3.9 | 3.5 | 4.3 | USA White |
| Male | 1981 | 3.3 | 3.0 | 3.7 | USA White |
| Male | 1982 | 3.7 | 3.3 | 4.1 | USA White |
| Male | 1983 | 3.9 | 3.6 | 4.3 | USA White |
| Male | 1984 | 3.8 | 3.4 | 4.2 | USA White |
| Male | 1985 | 4.1 | 3.8 | 4.5 | USA White |
| Male | 1986 | 4.1 | 3.7 | 4.5 | USA White |
| Male | 1987 | 4.3 | 3.9 | 4.7 | USA White |
| Male | 1988 | 4.3 | 3.9 | 4.7 | USA White |
| Male | 1989 | 4.0 | 3.6 | 4.4 | USA White |
| Male | 1990 | 4.8 | 4.4 | 5.2 | USA White |
| Male | 1991 | 4.4 | 4.0 | 4.8 | USA White |
| Male | 1992 | 4.9 | 4.5 | 5.3 | USA White |
| Male | 1993 | 4.6 | 4.2 | 5.0 | USA White |
| Male | 1994 | 4.6 | 4.2 | 5.0 | USA White |
| Male | 1995 | 4.4 | 4.0 | 4.7 | USA White |
| Male | 1996 | 4.9 | 4.5 | 5.3 | USA White |
| Male | 1997 | 5.3 | 4.9 | 5.8 | USA White |
| Male | 1998 | 5.0 | 4.6 | 5.4 | USA White |
| Male | 1999 | 5.6 | 5.2 | 6.0 | USA White |
| Male | 2000 | 5.3 | 4.9 | 5.7 | USA White |
| Male | 2001 | 5.5 | 5.1 | 5.9 | USA White |
| Male | 2002 | 5.2 | 4.9 | 5.6 | USA White |
| Male | 2003 | 5.3 | 4.9 | 5.7 | USA White |
| Male | 2004 | 5.9 | 5.5 | 6.3 | USA White |

|      |      |      |      |      |           |
|------|------|------|------|------|-----------|
| Male | 2005 | 5.4  | 5.0  | 5.8  | USA White |
| Male | 2006 | 5.4  | 5.1  | 5.8  | USA White |
| Male | 2007 | 5.3  | 4.9  | 5.7  | USA White |
| Male | 2008 | 5.4  | 5.1  | 5.8  | USA White |
| Male | 2009 | 5.5  | 5.2  | 5.9  | USA White |
| Male | 2010 | 5.3  | 4.9  | 5.7  | USA White |
| Male | 2011 | 5.4  | 5.1  | 5.8  | USA White |
| Male | 2012 | 5.2  | 4.9  | 5.6  | USA White |
| Male | 2013 | 5.2  | 4.8  | 5.5  | USA White |
| Male | 2014 | 4.9  | 4.6  | 5.2  | USA White |
| Male | 2015 | 5.3  | 4.9  | 5.6  | USA White |
| Male | 2016 | 5.2  | 4.8  | 5.5  | USA White |
| Male | 2017 | 5.3  | 5.0  | 5.6  | USA White |
| Male | 2018 | 4.9  | 4.6  | 5.3  | USA White |
| Male | 1975 | 14.6 | 12.0 | 17.6 | USA Black |
| Male | 1976 | 12.6 | 10.3 | 15.4 | USA Black |
| Male | 1977 | 14.9 | 12.3 | 17.9 | USA Black |
| Male | 1978 | 18.0 | 15.1 | 21.1 | USA Black |
| Male | 1979 | 17.1 | 14.4 | 20.2 | USA Black |
| Male | 1980 | 13.9 | 11.5 | 16.7 | USA Black |
| Male | 1981 | 16.5 | 13.8 | 19.4 | USA Black |
| Male | 1982 | 17.3 | 14.6 | 20.3 | USA Black |
| Male | 1983 | 17.2 | 14.6 | 20.2 | USA Black |
| Male | 1984 | 15.1 | 12.6 | 17.8 | USA Black |
| Male | 1985 | 16.7 | 14.1 | 19.6 | USA Black |
| Male | 1986 | 18.4 | 15.7 | 21.4 | USA Black |
| Male | 1987 | 15.2 | 12.8 | 18.0 | USA Black |
| Male | 1988 | 14.1 | 11.8 | 16.7 | USA Black |
| Male | 1989 | 13.1 | 10.9 | 15.6 | USA Black |
| Male | 1990 | 16.1 | 13.7 | 18.9 | USA Black |
| Male | 1991 | 12.3 | 10.3 | 14.7 | USA Black |
| Male | 1992 | 13.2 | 11.1 | 15.6 | USA Black |
| Male | 1993 | 12.6 | 10.6 | 15.0 | USA Black |
| Male | 1994 | 10.8 | 8.9  | 13.0 | USA Black |
| Male | 1995 | 10.3 | 8.5  | 12.4 | USA Black |
| Male | 1996 | 12.0 | 10.1 | 14.3 | USA Black |
| Male | 1997 | 7.7  | 6.2  | 9.5  | USA Black |
| Male | 1998 | 9.2  | 7.5  | 11.1 | USA Black |
| Male | 1999 | 8.1  | 6.5  | 9.8  | USA Black |
| Male | 2000 | 7.5  | 6.0  | 9.1  | USA Black |
| Male | 2001 | 8.1  | 6.6  | 9.9  | USA Black |
| Male | 2002 | 7.4  | 6.0  | 9.0  | USA Black |
| Male | 2003 | 7.1  | 5.7  | 8.7  | USA Black |
| Male | 2004 | 6.3  | 5.0  | 7.8  | USA Black |
| Male | 2005 | 5.5  | 4.4  | 6.9  | USA Black |
| Male | 2006 | 5.9  | 4.7  | 7.3  | USA Black |



|        |      |     |     |     |           |
|--------|------|-----|-----|-----|-----------|
| Male   | 2007 | 5.8 | 4.7 | 7.1 | USA Black |
| Male   | 2008 | 5.5 | 4.5 | 6.8 | USA Black |
| Male   | 2009 | 4.3 | 3.4 | 5.4 | USA Black |
| Male   | 2010 | 4.6 | 3.7 | 5.7 | USA Black |
| Male   | 2011 | 3.5 | 2.7 | 4.5 | USA Black |
| Male   | 2012 | 4.3 | 3.4 | 5.3 | USA Black |
| Male   | 2013 | 5.0 | 4.1 | 6.1 | USA Black |
| Male   | 2014 | 3.9 | 3.1 | 4.8 | USA Black |
| Male   | 2015 | 4.1 | 3.3 | 5.1 | USA Black |
| Male   | 2016 | 4.4 | 3.5 | 5.3 | USA Black |
| Male   | 2017 | 3.7 | 2.9 | 4.6 | USA Black |
| Male   | 2018 | 3.5 | 2.7 | 4.3 | USA Black |
| Female | 1975 | 1.4 | 1.2 | 1.7 | USA       |
| Female | 1976 | 1.6 | 1.4 | 1.8 | USA       |
| Female | 1977 | 1.6 | 1.3 | 1.8 | USA       |
| Female | 1978 | 1.3 | 1.1 | 1.5 | USA       |
| Female | 1979 | 1.5 | 1.3 | 1.7 | USA       |
| Female | 1980 | 1.6 | 1.4 | 1.8 | USA       |
| Female | 1981 | 1.6 | 1.4 | 1.8 | USA       |
| Female | 1982 | 1.5 | 1.3 | 1.7 | USA       |
| Female | 1983 | 1.4 | 1.2 | 1.6 | USA       |
| Female | 1984 | 1.5 | 1.3 | 1.7 | USA       |
| Female | 1985 | 1.5 | 1.3 | 1.7 | USA       |
| Female | 1986 | 1.6 | 1.4 | 1.8 | USA       |
| Female | 1987 | 1.4 | 1.3 | 1.6 | USA       |
| Female | 1988 | 1.5 | 1.3 | 1.7 | USA       |
| Female | 1989 | 1.4 | 1.2 | 1.6 | USA       |
| Female | 1990 | 1.5 | 1.3 | 1.7 | USA       |
| Female | 1991 | 1.6 | 1.4 | 1.8 | USA       |
| Female | 1992 | 1.3 | 1.1 | 1.5 | USA       |
| Female | 1993 | 1.5 | 1.3 | 1.7 | USA       |
| Female | 1994 | 1.3 | 1.2 | 1.5 | USA       |
| Female | 1995 | 1.4 | 1.2 | 1.5 | USA       |
| Female | 1996 | 1.4 | 1.2 | 1.6 | USA       |
| Female | 1997 | 1.4 | 1.2 | 1.6 | USA       |
| Female | 1998 | 1.2 | 1.1 | 1.4 | USA       |
| Female | 1999 | 1.4 | 1.2 | 1.6 | USA       |
| Female | 2000 | 1.4 | 1.2 | 1.5 | USA       |
| Female | 2001 | 1.2 | 1.0 | 1.3 | USA       |
| Female | 2002 | 1.2 | 1.1 | 1.4 | USA       |
| Female | 2003 | 1.2 | 1.1 | 1.4 | USA       |
| Female | 2004 | 1.4 | 1.2 | 1.6 | USA       |
| Female | 2005 | 1.2 | 1.0 | 1.3 | USA       |
| Female | 2006 | 1.3 | 1.1 | 1.4 | USA       |
| Female | 2007 | 1.2 | 1.1 | 1.4 | USA       |
| Female | 2008 | 1.0 | 0.9 | 1.2 | USA       |

|        |      |     |     |     |           |
|--------|------|-----|-----|-----|-----------|
| Female | 2009 | 1.3 | 1.1 | 1.4 | USA       |
| Female | 2010 | 1.1 | 0.9 | 1.2 | USA       |
| Female | 2011 | 1.1 | 1.0 | 1.3 | USA       |
| Female | 2012 | 1.0 | 0.9 | 1.2 | USA       |
| Female | 2013 | 1.1 | 1.0 | 1.3 | USA       |
| Female | 2014 | 1.1 | 1.0 | 1.2 | USA       |
| Female | 2015 | 1.1 | 1.0 | 1.2 | USA       |
| Female | 2016 | 1.0 | 0.9 | 1.2 | USA       |
| Female | 2017 | 1.1 | 1.0 | 1.2 | USA       |
| Female | 2018 | 1.1 | 1.0 | 1.2 | USA       |
| Female | 1975 | 1.3 | 1.1 | 1.5 | USA White |
| Female | 1976 | 1.4 | 1.2 | 1.6 | USA White |
| Female | 1977 | 1.3 | 1.1 | 1.5 | USA White |
| Female | 1978 | 1.1 | 0.9 | 1.3 | USA White |
| Female | 1979 | 1.3 | 1.1 | 1.5 | USA White |
| Female | 1980 | 1.2 | 1.0 | 1.4 | USA White |
| Female | 1981 | 1.2 | 1.0 | 1.4 | USA White |
| Female | 1982 | 1.2 | 1.1 | 1.5 | USA White |
| Female | 1983 | 1.2 | 1.0 | 1.4 | USA White |
| Female | 1984 | 1.2 | 1.0 | 1.4 | USA White |
| Female | 1985 | 1.2 | 1.0 | 1.4 | USA White |
| Female | 1986 | 1.4 | 1.2 | 1.6 | USA White |
| Female | 1987 | 1.2 | 1.1 | 1.4 | USA White |
| Female | 1988 | 1.3 | 1.1 | 1.5 | USA White |
| Female | 1989 | 1.2 | 1.0 | 1.4 | USA White |
| Female | 1990 | 1.2 | 1.1 | 1.5 | USA White |
| Female | 1991 | 1.4 | 1.2 | 1.6 | USA White |
| Female | 1992 | 1.1 | 1.0 | 1.3 | USA White |
| Female | 1993 | 1.4 | 1.2 | 1.6 | USA White |
| Female | 1994 | 1.2 | 1.0 | 1.4 | USA White |
| Female | 1995 | 1.2 | 1.1 | 1.4 | USA White |
| Female | 1996 | 1.2 | 1.0 | 1.4 | USA White |
| Female | 1997 | 1.2 | 1.1 | 1.4 | USA White |
| Female | 1998 | 1.1 | 0.9 | 1.3 | USA White |
| Female | 1999 | 1.3 | 1.1 | 1.5 | USA White |
| Female | 2000 | 1.3 | 1.1 | 1.5 | USA White |
| Female | 2001 | 1.2 | 1.0 | 1.3 | USA White |
| Female | 2002 | 1.1 | 0.9 | 1.3 | USA White |
| Female | 2003 | 1.2 | 1.0 | 1.3 | USA White |
| Female | 2004 | 1.4 | 1.2 | 1.6 | USA White |
| Female | 2005 | 1.1 | 1.0 | 1.3 | USA White |
| Female | 2006 | 1.2 | 1.1 | 1.4 | USA White |
| Female | 2007 | 1.2 | 1.0 | 1.4 | USA White |
| Female | 2008 | 1.0 | 0.9 | 1.2 | USA White |
| Female | 2009 | 1.2 | 1.0 | 1.4 | USA White |
| Female | 2010 | 1.0 | 0.9 | 1.2 | USA White |

|        |      |     |     |     |           |
|--------|------|-----|-----|-----|-----------|
| Female | 2011 | 1.1 | 1.0 | 1.3 | USA White |
| Female | 2012 | 1.1 | 0.9 | 1.2 | USA White |
| Female | 2013 | 1.2 | 1.1 | 1.4 | USA White |
| Female | 2014 | 1.1 | 1.0 | 1.3 | USA White |
| Female | 2015 | 1.1 | 1.0 | 1.3 | USA White |
| Female | 2016 | 1.0 | 0.9 | 1.1 | USA White |
| Female | 2017 | 1.1 | 0.9 | 1.2 | USA White |
| Female | 2018 | 1.1 | 0.9 | 1.2 | USA White |
| Female | 1975 | 2.8 | 1.8 | 4.1 | USA Black |
| Female | 1976 | 3.9 | 2.8 | 5.4 | USA Black |
| Female | 1977 | 4.3 | 3.1 | 5.9 | USA Black |
| Female | 1978 | 3.4 | 2.3 | 4.8 | USA Black |
| Female | 1979 | 3.8 | 2.7 | 5.2 | USA Black |
| Female | 1980 | 6.0 | 4.6 | 7.7 | USA Black |
| Female | 1981 | 5.9 | 4.5 | 7.5 | USA Black |
| Female | 1982 | 4.6 | 3.4 | 6.1 | USA Black |
| Female | 1983 | 3.1 | 2.2 | 4.4 | USA Black |
| Female | 1984 | 4.8 | 3.5 | 6.3 | USA Black |
| Female | 1985 | 4.6 | 3.4 | 6.0 | USA Black |
| Female | 1986 | 4.7 | 3.6 | 6.1 | USA Black |
| Female | 1987 | 3.6 | 2.6 | 4.9 | USA Black |
| Female | 1988 | 3.9 | 2.9 | 5.2 | USA Black |
| Female | 1989 | 4.0 | 3.0 | 5.3 | USA Black |
| Female | 1990 | 4.2 | 3.1 | 5.5 | USA Black |
| Female | 1991 | 3.7 | 2.7 | 4.9 | USA Black |
| Female | 1992 | 3.9 | 2.9 | 5.1 | USA Black |
| Female | 1993 | 3.5 | 2.5 | 4.6 | USA Black |
| Female | 1994 | 3.7 | 2.8 | 4.9 | USA Black |
| Female | 1995 | 3.2 | 2.3 | 4.2 | USA Black |
| Female | 1996 | 3.4 | 2.6 | 4.5 | USA Black |
| Female | 1997 | 3.5 | 2.6 | 4.6 | USA Black |
| Female | 1998 | 3.0 | 2.2 | 4.0 | USA Black |
| Female | 1999 | 2.9 | 2.1 | 3.9 | USA Black |
| Female | 2000 | 3.0 | 2.2 | 3.9 | USA Black |
| Female | 2001 | 1.8 | 1.2 | 2.6 | USA Black |
| Female | 2002 | 2.4 | 1.7 | 3.2 | USA Black |
| Female | 2003 | 2.5 | 1.9 | 3.4 | USA Black |
| Female | 2004 | 2.6 | 1.9 | 3.4 | USA Black |
| Female | 2005 | 2.0 | 1.4 | 2.8 | USA Black |
| Female | 2006 | 2.0 | 1.4 | 2.7 | USA Black |
| Female | 2007 | 2.0 | 1.4 | 2.7 | USA Black |
| Female | 2008 | 1.3 | 0.9 | 1.9 | USA Black |
| Female | 2009 | 2.5 | 1.9 | 3.2 | USA Black |
| Female | 2010 | 1.8 | 1.3 | 2.5 | USA Black |
| Female | 2011 | 1.5 | 1.0 | 2.0 | USA Black |
| Female | 2012 | 1.1 | 0.7 | 1.6 | USA Black |

|        |      |     |     |     |           |
|--------|------|-----|-----|-----|-----------|
| Female | 2013 | 1.4 | 1.0 | 1.9 | USA Black |
| Female | 2014 | 1.5 | 1.1 | 2.1 | USA Black |
| Female | 2015 | 1.4 | 1.0 | 1.9 | USA Black |
| Female | 2016 | 1.6 | 1.1 | 2.1 | USA Black |
| Female | 2017 | 1.5 | 1.1 | 2.0 | USA Black |
| Female | 2018 | 1.3 | 0.9 | 1.8 | USA Black |
